# Supplementary material for: Identifying Virulence-Associated Genes Using Transcriptomic and Proteomic Association Analyses of the Plant Parasitic Nematode Bursaphelenchus mucronatus
Source: MDPI journal article supplement (doi:10.3390/ijms17091492), 2016-09-07
Supplement: s1 [file s1]

# Supplementary Materials: Identifying Virulence-Associated Genes Using Transcriptomic and Proteomic Association Analyses of the Plant Parasitic Nematode *Bursaphelenchus mucronatus*

Lifeng Zhou, Fengmao Chen, Hongyang Pan, Jianren Ye, Xuejiao Dong, Chunyan Li and Fengling Lin

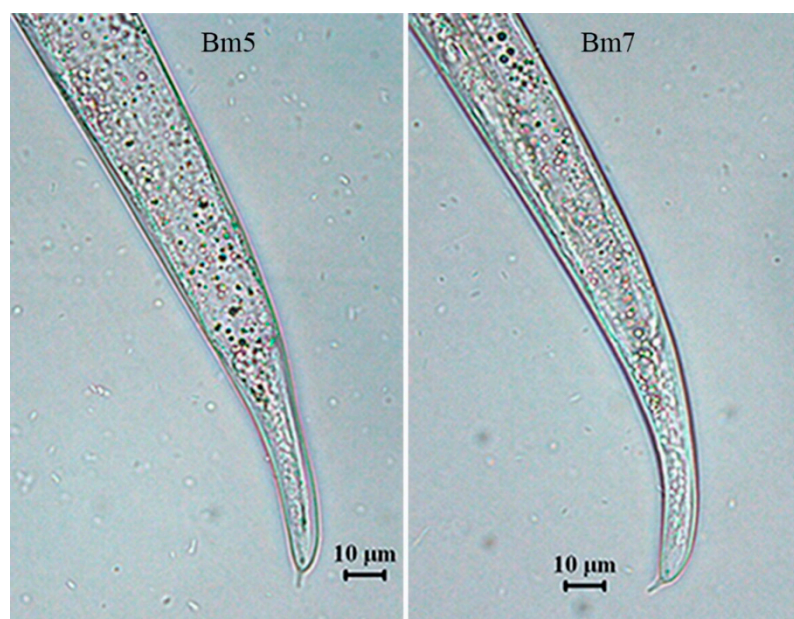

**Figure S1.** Photomicrographs showing the terminal mucro of the two *B. mucronatus* isolates.

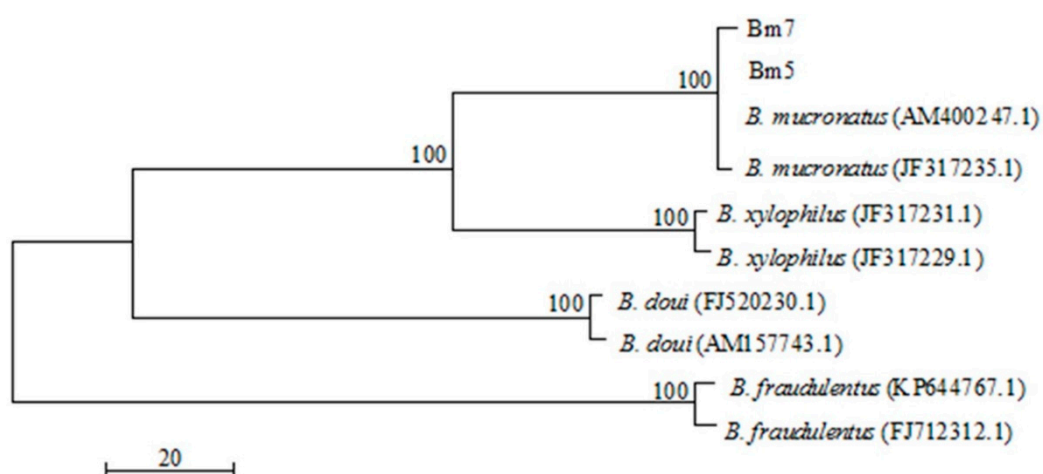

**Figure S2.** Phylogenetic tree of the two nematode isolates based on their internal transcribed spacer (ITS) sequences and that of four *Bursaphelenchus* species.

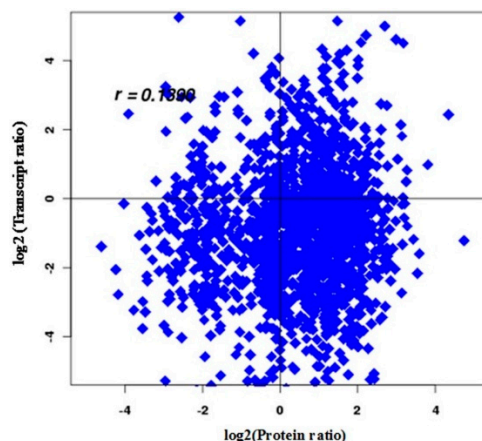

**Figure S3.** Correlation of protein and mRNA levels in *B. mucronatus*.

**Table S4.** Differential expression proteins and differential expression genes were in the same direction (either up or down).

| Protein            | Protein Quantition<br>(Bm5/Bm7) | Gene Quantitionlog2<br>(Bm5/Bm7) | Fdr                    | diff |
|--------------------|---------------------------------|----------------------------------|------------------------|------|
| Unigene5099_All    | 4.596                           | 1.723270188                      | $2.52 \times 10^{-68}$ | +    |
| CL1521.Contig2_All | 0.453                           | -4.524521727                     | $5.06 \times 10^{-6}$  | -    |
| CL4602.Contig1_All | 3.433                           | 1.463417323                      | $3.00 \times 10^{-7}$  | +    |
| Unigene11200_All   | 4.235                           | 4.522907959                      | $3.74 \times 10^{-6}$  | +    |
| CL3279.Contig1_All | 0.055                           | -2.784541118                     | $3.58 \times 10^{-6}$  | -    |
| Unigene1879_All    | 3.183                           | 2.35834097                       | $2.58 \times 10^{-69}$ | +    |
| Unigene518_All     | 2.889                           | 3.384299994                      | $8.99 \times 10^{-21}$ | +    |
| CL2220.Contig2_All | 0.212                           | -2.64689025                      | $5.54 \times 10^{-10}$ | -    |
| CL3787.Contig2_All | 2.129                           | 2.349444402                      | $1.64 \times 10^{-17}$ | +    |
| CL2825.Contig2_All | 0.299                           | -2.827380033                     | $2.04 \times 10^{-6}$  | -    |
| Unigene3119_All    | 2.36                            | 3.148094253                      | 0                      | +    |
| CL3388.Contig1_All | 0.207                           | -1.236009293                     | $2.09 \times 10^{-10}$ | -    |
| Unigene816_All     | 3.245                           | 1.220040673                      | 0                      | +    |
| CL4434.Contig1_All | 0.172                           | -4.031658084                     | $2.89 \times 10^{-11}$ | -    |
| Unigene3383_All    | 2.538                           | 1.023359726                      | 0                      | +    |
| CL4841.Contig2_All | 0.272                           | -1.996926327                     | $6.10 \times 10^{-8}$  | -    |
| Unigene6964_All    | 1.713                           | 2.887065527                      | 0                      | +    |
| Unigene3207_All    | 3.286                           | 4.289922182                      | 0                      | +    |
| Unigene12118_All   | 2.372                           | 12.36888837                      | $1.19 \times 10^{-8}$  | +    |
| Unigene917_All     | 3.5                             | 2.102744668                      | $3.68 \times 10^{-31}$ | +    |
| Unigene1752_All    | 0.247                           | -2.768538381                     | 0                      | -    |
| Unigene5837_All    | 1.956                           | 1.013823468                      | $7.80 \times 10^{-12}$ | +    |
| Unigene8364_All    | 1.606                           | 2.309994064                      | $1.09 \times 10^{-11}$ | +    |
| CL2312.Contig1_All | 0.192                           | -9.259037041                     | $5.33 \times 10^{-5}$  | -    |
| Unigene4571_All    | 3.721                           | 1.082402147                      | $8.31 \times 10^{-15}$ | +    |
| CL1393.Contig2_All | 2.288                           | 3.10791162                       | $1.68 \times 10^{-11}$ | +    |
| Unigene7838_All    | 0.36                            | -1.256647206                     | $2.75 \times 10^{-12}$ | -    |
| Unigene2609_All    | 0.134                           | -2.036025556                     | $4.67 \times 10^{-13}$ | -    |
| CL2047.Contig2_All | 0.181                           | -9.153298683                     | $2.70 \times 10^{-5}$  | -    |
| Unigene8379_All    | 2.01                            | 1.988572286                      | $6.70 \times 10^{-4}$  | +    |
| CL3063.Contig1_All | 0.254                           | -1.76894171                      | $1.17 \times 10^{-91}$ | -    |
| Unigene7452_All    | 0.293                           | -3.041774758                     | $2.67 \times 10^{-13}$ | -    |

|                    |       |              |                        |   |
|--------------------|-------|--------------|------------------------|---|
| Unigene18768_All   | 0.258 | -11.8473706  | $3.13 \times 10^{-12}$ | - |
| CL3469.Contig5_All | 0.328 | -2.686477752 | $1.35 \times 10^{-6}$  | - |
| Unigene5292_All    | 2.005 | 1.584937987  | 0                      | + |
| Unigene3722_All    | 0.2   | -1.460350097 | 0                      | - |
| Unigene10607_All   | 7.04  | 10.69740201  | $1.50 \times 10^{-6}$  | + |
| CL5015.Contig1_All | 2.363 | 1.528488236  | $5.47 \times 10^{-56}$ | + |
| Unigene7817_All    | 2.172 | 1.219507525  | $7.44 \times 10^{-16}$ | + |
| CL3471.Contig2_All | 0.139 | -2.903368661 | $3.06 \times 10^{-15}$ | - |
| Unigene1357_All    | 0.272 | -1.260321281 | $6.09 \times 10^{-25}$ | - |
| CL3666.Contig1_All | 0.086 | -2.98516452  | $1.67 \times 10^{-16}$ | - |
| CL3542.Contig2_All | 0.38  | -2.850457012 | $8.76 \times 10^{-26}$ | - |
| Unigene11218_All   | 4.02  | 11.55161214  | $1.20 \times 10^{-14}$ | + |
| Unigene936_All     | 3.208 | 1.625188933  | 0                      | + |
| Unigene7663_All    | 1.88  | 1.403618816  | 0                      | + |
| Unigene5221_All    | 1.836 | 2.012118245  | $1.09 \times 10^{-72}$ | + |
| CL5411.Contig2_All | 0.138 | -2.773890033 | $3.98 \times 10^{-31}$ | - |
| CL2676.Contig1_All | 0.125 | -3.676776745 | $5.39 \times 10^{-11}$ | - |
| Unigene7737_All    | 0.183 | -1.692996527 | $6.59 \times 10^{-69}$ | - |
| Unigene8544_All    | 4.609 | 1.99414376   | $1.54 \times 10^{-27}$ | + |
| Unigene7882_All    | 1.507 | 1.980910585  | $5.40 \times 10^{-25}$ | + |
| Unigene5671_All    | 2.508 | 2.89177294   | 0                      | + |
| CL1349.Contig1_All | 2.069 | 1.593332494  | $1.09 \times 10^{-5}$  | + |
| Unigene5006_All    | 2.743 | 1.548866142  | $4.75 \times 10^{-21}$ | + |
| Unigene4972_All    | 3.046 | 1.743653549  | 0                      | + |
| Unigene5774_All    | 2.247 | 1.040686422  | $4.40 \times 10^{-6}$  | + |
| Unigene7816_All    | 2.769 | 2.081529377  | $2.16 \times 10^{-47}$ | + |
| CL5445.Contig2_All | 2.62  | 1.466409867  | $6.89 \times 10^{-11}$ | + |
| CL3920.Contig2_All | 0.23  | -2.957486241 | $6.15 \times 10^{-44}$ | - |
| CL4520.Contig1_All | 3.594 | 12.05985141  | $4.49 \times 10^{-10}$ | + |
| CL4233.Contig1_All | 0.63  | -1.332132346 | $6.13 \times 10^{-6}$  | - |
| CL3833.Contig2_All | 0.195 | -1.037796077 | $8.59 \times 10^{-6}$  | - |
| Unigene4651_All    | 0.21  | -2.762411646 | $1.32 \times 10^{-25}$ | - |
| CL477.Contig1_All  | 2.519 | 15.43549447  | $2.59 \times 10^{-56}$ | + |
| CL4807.Contig1_All | 2.034 | 12.40577968  | $1.20 \times 10^{-14}$ | + |
| Unigene8425_All    | 2.141 | 3.774518662  | $6.04 \times 10^{-41}$ | + |
| Unigene8344_All    | 1.567 | 3.300875754  | 0                      | + |
| Unigene18266_All   | 0.576 | -4.000440989 | $5.49 \times 10^{-11}$ | - |
| Unigene9872_All    | 1.687 | 2.249200963  | $2.59 \times 10^{-64}$ | + |
| CL152.Contig2_All  | 0.273 | -1.468562505 | $3.34 \times 10^{-44}$ | - |
| CL5250.Contig1_All | 0.657 | -11.17573666 | $1.36 \times 10^{-5}$  | - |
| Unigene4416_All    | 5.171 | 1.033065258  | 0                      | + |
| Unigene6078_All    | 0.085 | -3.765484578 | 0                      | - |
| CL4316.Contig2_All | 0.235 | -1.702461015 | $1.44 \times 10^{-5}$  | - |
| Unigene8408_All    | 2.502 | 1.729414841  | $9.39 \times 10^{-5}$  | + |
| CL2368.Contig1_All | 1.755 | 1.828087957  | $9.40 \times 10^{-32}$ | + |
| Unigene6753_All    | 0.435 | -1.161753016 | 0                      | - |
| Unigene12944_All   | 3.073 | 10.77000309  | $2.84 \times 10^{-5}$  | + |
| CL1555.Contig2_All | 0.225 | -5.554709379 | $7.89 \times 10^{-25}$ | - |
| Unigene8377_All    | 0.168 | -2.686543802 | $2.80 \times 10^{-12}$ | - |
| Unigene15532_All   | 0.587 | -4.521463064 | $5.07 \times 10^{-6}$  | - |
| Unigene4866_All    | 3.098 | 3.25994237   | $1.66 \times 10^{-80}$ | + |
| Unigene2198_All    | 9.041 | 4.508872749  | 0                      | + |

|                    |       |              |                        |   |
|--------------------|-------|--------------|------------------------|---|
| CL2595.Contig1_All | 4.69  | 1.307882885  | 0                      | + |
| CL4242.Contig1_All | 0.135 | -3.869728975 | $7.90 \times 10^{-4}$  | - |
| CL2751.Contig2_All | 0.251 | -2.554052115 | $5.53 \times 10^{-14}$ | - |
| Unigene4171_All    | 3.963 | 1.508763112  | $9.71 \times 10^{-29}$ | + |
| Unigene636_All     | 6.058 | 1.996905085  | $1.14 \times 10^{-13}$ | + |
| Unigene7958_All    | 0.241 | -1.563677495 | $1.32 \times 10^{-90}$ | - |
| Unigene6172_All    | 2.299 | 3.775971382  | 0                      | + |
| CL4169.Contig1_All | 0.122 | -1.379472793 | $2.99 \times 10^{-11}$ | - |
| CL5426.Contig1_All | 0.26  | -4.585133873 | $2.65 \times 10^{-6}$  | - |
| Unigene2628_All    | 3.672 | 2.790465783  | $1.40 \times 10^{-20}$ | + |
| CL827.Contig2_All  | 0.189 | -1.284312981 | $5.68 \times 10^{-7}$  | - |
| CL3876.Contig1_All | 1.536 | 2.049552103  | $1.11 \times 10^{-13}$ | + |
| CL3787.Contig1_All | 2.912 | 4.185763469  | $5.94 \times 10^{-9}$  | + |
| CL1188.Contig2_All | 0.222 | -1.004005634 | $7.84 \times 10^{-4}$  | - |
| Unigene7182_All    | 3.986 | 3.495924139  | $8.99 \times 10^{-21}$ | + |
| CL4990.Contig2_All | 0.642 | -11.46209323 | $4.03 \times 10^{-4}$  | - |
| CL731.Contig1_All  | 0.182 | -1.836004402 | $2.46 \times 10^{-17}$ | - |
| Unigene2932_All    | 0.153 | -2.126150701 | $1.18 \times 10^{-11}$ | - |
| 9CL918.Contig3_All | 0.474 | -2.869697298 | $3.98 \times 10^{-10}$ | - |
| CL846.Contig2_All  | 0.266 | -3.015984624 | $2.95 \times 10^{-6}$  | - |
| Unigene2081_All    | 0.277 | -3.033619909 | 0                      | - |
| Unigene776_All     | 2.739 | 2.689053679  | 0                      | + |
| Unigene4940_All    | 2.036 | 2.528609427  | $1.68 \times 10^{-70}$ | + |
| Unigene5927_All    | 0.623 | -1.873163964 | $3.23 \times 10^{-38}$ | - |
| Unigene2447_All    | 4.653 | 4.72863827   | 0                      | + |
| CL4768.Contig1_All | 2.822 | 1.825873141  | $5.45 \times 10^{-79}$ | + |
| Unigene10193_All   | 1.719 | 11.89129007  | $1.21 \times 10^{-12}$ | + |
| Unigene110_All     | 2.515 | 2.28784217   | $3.59 \times 10^{-62}$ | + |
| CL5135.Contig1_All | 0.219 | -1.189702902 | $5.28 \times 10^{-4}$  | - |
| CL924.Contig2_All  | 0.307 | -2.52142377  | $3.07 \times 10^{-29}$ | - |
| CL5150.Contig1_All | 0.244 | -9.239121132 | $5.32 \times 10^{-5}$  | - |
| Unigene9846_All    | 1.754 | 2.855470488  | 0                      | + |
| Unigene9538_All    | 2.144 | 3.081704627  | $1.03 \times 10^{-55}$ | + |
| Unigene3371_All    | 4.018 | 1.322974996  | $2.64 \times 10^{-31}$ | + |
| CL1117.Contig2_All | 0.528 | -1.811884428 | $1.80 \times 10^{-4}$  | - |
| CL3034.Contig2_All | 0.216 | -2.510042029 | 0                      | - |
| CL454.Contig2_All  | 2.206 | 12.05263597  | $4.48 \times 10^{-14}$ | + |
| CL5348.Contig1_All | 0.483 | -2.469665996 | $3.20 \times 10^{-37}$ | - |
| Unigene1544_All    | 2.05  | 1.020429219  | 0                      | + |
| CL1554.Contig2_All | 2.698 | 1.789916426  | $5.82 \times 10^{-14}$ | + |
| CL1735.Contig2_All | 0.276 | -2.949575182 | $5.38 \times 10^{-26}$ | - |
| Unigene703_All     | 8.136 | 1.143461235  | $1.77 \times 10^{-70}$ | + |
| Unigene8638_All    | 8.646 | 2.126552005  | 0                      | + |
| CL3920.Contig3_All | 0.174 | -3.149478214 | $5.10 \times 10^{-7}$  | - |
| Unigene2623_All    | 1.824 | 2.03487808   | $5.52 \times 10^{-9}$  | + |
| Unigene6108_All    | 2.08  | 1.816755907  | 0                      | + |
| Unigene11930_All   | 3.211 | 11.95077458  | $2.84 \times 10^{-5}$  | + |
| CL2320.Contig1_All | 2.839 | 16.09505081  | 0                      | + |
| Unigene680_All     | 2.249 | 2.301898073  | $2.52 \times 10^{-77}$ | + |
| CL1534.Contig2_All | 0.344 | -3.676561673 | $5.38 \times 10^{-11}$ | - |
| Unigene21428_All   | 0.288 | -10.4604559  | $2.05 \times 10^{-4}$  | - |

**Table S5.** KEGG pathway enrichment analysis of differentially expressed transcripts in high virulence (Bm5) and low virulence (Bm7) *Bursaphelenchus mucronarius* isolates.

| #  | Pathway                                                                   | DEGs Genes with Pathway<br>Annotation (8785) | All genes with Pathway<br>Annotation (19776) | p Value      | Q Value      | Pathway ID | Level 1                              | Level 2                             |
|----|---------------------------------------------------------------------------|----------------------------------------------|----------------------------------------------|--------------|--------------|------------|--------------------------------------|-------------------------------------|
| 1  | <a href="#">Ribosome</a>                                                  | 358 (4.08%)                                  | 520 (2.63%)                                  | 4.349155e-30 | 1.104685e-27 | ko03010    | Genetic Information Processing       | Translation                         |
| 2  | <a href="#">Amoebiasis</a>                                                | 362 (4.12%)                                  | 576 (2.91%)                                  | 1.499134e-19 | 1.903900e-17 | ko05146    | Human Diseases                       | Infectious diseases: Parasitic      |
| 3  | <a href="#">Pathogenic Escherichia coli infection</a>                     | 177 (2.01%)                                  | 280 (1.42%)                                  | 1.493591e-10 | 1.264574e-08 | ko05130    | Human Diseases                       | Infectious diseases: Bacterial      |
| 4  | <a href="#">Dilated cardiomyopathy</a>                                    | 213 (2.42%)                                  | 356 (1.8%)                                   | 2.758634e-09 | 1.751733e-07 | ko05414    | Human Diseases                       | Cardiovascular diseases             |
| 5  | <a href="#">Focal adhesion</a>                                            | 452 (5.15%)                                  | 837 (4.23%)                                  | 8.358826e-09 | 4.214419e-07 | ko04510    | Cellular Processes                   | Cell communication                  |
| 6  | <a href="#">Alzheimer's disease</a>                                       | 295 (3.36%)                                  | 521 (2.63%)                                  | 9.955321e-09 | 4.214419e-07 | ko05010    | Human Diseases                       | Neurodegenerative diseases          |
| 7  | <a href="#">Huntington's disease</a>                                      | 288 (3.28%)                                  | 515 (2.6%)                                   | 7.343513e-08 | 2.664646e-06 | ko05016    | Human Diseases                       | Neurodegenerative diseases          |
| 8  | <a href="#">Cardiac muscle contraction</a>                                | 222 (2.53%)                                  | 387 (1.96%)                                  | 1.667616e-07 | 5.294681e-06 | ko04260    | Organismal Systems                   | Circulatory system                  |
| 9  | <a href="#">Hypertrophic cardiomyopathy (HCM)</a>                         | 203 (2.31%)                                  | 352 (1.78%)                                  | 3.274355e-07 | 9.013662e-06 | ko05410    | Human Diseases                       | Cardiovascular diseases             |
| 10 | <a href="#">Viral myocarditis</a>                                         | 153 (1.74%)                                  | 255 (1.29%)                                  | 3.548686e-07 | 9.013662e-06 | ko05416    | Human Diseases                       | Cardiovascular diseases             |
| 11 | <a href="#">ECM-receptor interaction</a>                                  | 255 (2.9%)                                   | 458 (2.32%)                                  | 6.558946e-07 | 1.514520e-05 | ko04512    | Environmental Information Processing | Signaling molecules and interaction |
| 12 | <a href="#">Tight junction</a>                                            | 262 (2.98%)                                  | 475 (2.4%)                                   | 1.29183e-06  | 2.734374e-05 | ko04530    | Cellular Processes                   | Cell communication                  |
| 13 | <a href="#">Oxidative phosphorylation</a>                                 | 242 (2.75%)                                  | 436 (2.2%)                                   | 1.721523e-06 | 3.363591e-05 | ko00190    | Metabolism                           | Energy metabolism                   |
| 14 | <a href="#">Salmonella infection</a>                                      | 204 (2.32%)                                  | 362 (1.83%)                                  | 2.813534e-06 | 5.104555e-05 | ko05132    | Human Diseases                       | Infectious diseases: Bacterial      |
| 15 | <a href="#">Melanogenesis</a>                                             | 124 (1.41%)                                  | 208 (1.05%)                                  | 6.869217e-06 | 1.163187e-04 | ko04916    | Organismal Systems                   | Endocrine system                    |
| 16 | <a href="#">Parkinson's disease</a>                                       | 238 (2.71%)                                  | 435 (2.2%)                                   | 8.45124e-06  | 1.341634e-04 | ko05012    | Human Diseases                       | Neurodegenerative diseases          |
| 17 | <a href="#">Salivary secretion</a>                                        | 162 (1.84%)                                  | 284 (1.44%)                                  | 1.143766e-05 | 1.708921e-04 | ko04970    | Organismal Systems                   | Digestive system                    |
| 18 | <a href="#">Gastric acid secretion</a>                                    | 187 (2.13%)                                  | 338 (1.71%)                                  | 3.187806e-05 | 4.415084e-04 | ko04971    | Organismal Systems                   | Digestive system                    |
| 19 | <a href="#">Endocytosis</a>                                               | 223 (2.54%)                                  | 411 (2.08%)                                  | 3.302622e-05 | 4.415084e-04 | ko04144    | Cellular Processes                   | Transport and catabolism            |
| 20 | <a href="#">Phagosome</a>                                                 | 181 (2.06%)                                  | 328 (1.66%)                                  | 5.135719e-05 | 6.522363e-04 | ko04145    | Cellular Processes                   | Transport and catabolism            |
| 21 | <a href="#">Endocrine and other factor-regulated calcium reabsorption</a> | 99 (1.13%)                                   | 166 (0.84%)                                  | 5.430883e-05 | 6.568782e-04 | ko04961    | Organismal Systems                   | Excretory system                    |
| 22 | <a href="#">Calcium signaling pathway</a>                                 | 260 (2.96%)                                  | 494 (2.5%)                                   | 0.0001260372 | 1.455157e-03 | ko04020    | Environmental Information Processing | Signal transduction                 |
| 23 | <a href="#">Vibrio cholerae infection</a>                                 | 188 (2.14%)                                  | 349 (1.76%)                                  | 0.0002191648 | 2.420342e-03 | ko05110    | Human Diseases                       | Infectious diseases: Bacterial      |
| 24 | <a href="#">Ribosome biogenesis in eukaryotes</a>                         | 141 (1.61%)                                  | 256 (1.29%)                                  | 0.0003655331 | 3.868559e-03 | ko03008    | Genetic Information Processing       | Translation                         |
| 25 | <a href="#">Vascular smooth muscle contraction</a>                        | 332 (3.78%)                                  | 654 (3.31%)                                  | 0.0005381806 | 5.419711e-03 | ko04270    | Organismal Systems                   | Circulatory system                  |
| 26 | <a href="#">African trypanosomiasis</a>                                   | 22 (0.25%)                                   | 29 (0.15%)                                   | 0.0005827658 | 5.419711e-03 | ko05143    | Human Diseases                       | Infectious diseases: Parasitic      |
| 27 | <a href="#">GnRH signaling pathway</a>                                    | 133 (1.51%)                                  | 242 (1.22%)                                  | 0.0005936804 | 5.419711e-03 | ko04912    | Organismal Systems                   | Endocrine system                    |
| 28 | <a href="#">Aminoacyl-tRNA biosynthesis</a>                               | 73 (0.83%)                                   | 123 (0.62%)                                  | 0.0005974485 | 5.419711e-03 | ko00970    | Genetic Information Processing       | Translation                         |
| 29 | <a href="#">Cholinergic synapse</a>                                       | 109 (1.24%)                                  | 194 (0.98%)                                  | 0.0006211402 | 5.440331e-03 | ko04725    | Organismal Systems                   | Nervous system                      |
| 30 | <a href="#">Chemokine signaling pathway</a>                               | 159 (1.81%)                                  | 296 (1.5%)                                   | 0.0007569009 | 6.408428e-03 | ko04062    | Organismal Systems                   | Immune system                       |
| 31 | <a href="#">Antigen processing and presentation</a>                       | 98 (1.12%)                                   | 175 (0.88%)                                  | 0.001312383  | 1.062029e-02 | ko04612    | Organismal Systems                   | Immune system                       |
| 32 | <a href="#">RNA transport</a>                                             | 238 (2.71%)                                  | 463 (2.34%)                                  | 0.001337989  | 1.062029e-02 | ko03013    | Genetic Information Processing       | Translation                         |
| 33 | <a href="#">Herpes simplex infection</a>                                  | 160 (1.82%)                                  | 303 (1.53%)                                  | 0.001917465  | 1.475867e-02 | ko05168    | Human Diseases                       | Infectious diseases: Viral          |

|    |                                                                        |             |             |             |              |         |                                      |                                     |
|----|------------------------------------------------------------------------|-------------|-------------|-------------|--------------|---------|--------------------------------------|-------------------------------------|
| 34 | <a href="#">Hedgehog signaling pathway</a>                             | 61 (0.69%)  | 104 (0.53%) | 0.00240174  | 1.754602e-02 | ko04340 | Environmental Information Processing | Signal transduction                 |
| 35 | <a href="#">Staphylococcus aureus infection</a>                        | 26 (0.3%)   | 38 (0.19%)  | 0.002417758 | 1.754602e-02 | ko05150 | Human Diseases                       | Infectious diseases: Bacterial      |
| 36 | <a href="#">Transcriptional misregulation in cancer</a>                | 165 (1.88%) | 317 (1.6%)  | 0.003572673 | 2.520719e-02 | ko05202 | Human Diseases                       | Cancers: Overview                   |
| 37 | <a href="#">Phototransduction</a>                                      | 71 (0.81%)  | 126 (0.64%) | 0.004609588 | 3.085248e-02 | ko04744 | Organismal Systems                   | Sensory system                      |
| 38 | <a href="#">Prion diseases</a>                                         | 72 (0.82%)  | 128 (0.65%) | 0.004615726 | 3.085248e-02 | ko05020 | Human Diseases                       | Neurodegenerative diseases          |
| 39 | <a href="#">Pancreatic secretion</a>                                   | 133 (1.51%) | 255 (1.29%) | 0.007529461 | 4.903803e-02 | ko04972 | Organismal Systems                   | Digestive system                    |
| 40 | <a href="#">Morphine addiction</a>                                     | 98 (1.12%)  | 183 (0.93%) | 0.007880047 | 5.003830e-02 | ko05032 | Human Diseases                       | Substance dependence                |
| 41 | <a href="#">Sulfur relay system</a>                                    | 32 (0.36%)  | 53 (0.27%)  | 0.0140478   | 8.592148e-02 | ko04122 | Genetic Information Processing       | Folding, sorting and degradation    |
| 42 | <a href="#">Olfactory transduction</a>                                 | 109 (1.24%) | 209 (1.06%) | 0.01444948  | 8.592148e-02 | ko04740 | Organismal Systems                   | Sensory system                      |
| 43 | <a href="#">Bacterial invasion of epithelial cells</a>                 | 131 (1.49%) | 255 (1.29%) | 0.01467617  | 8.592148e-02 | ko05100 | Human Diseases                       | Infectious diseases: Bacterial      |
| 44 | <a href="#">Spliceosome</a>                                            | 274 (3.12%) | 559 (2.83%) | 0.01501525  | 8.592148e-02 | ko03040 | Genetic Information Processing       | Transcription                       |
| 45 | <a href="#">Long-term depression</a>                                   | 71 (0.81%)  | 131 (0.66%) | 0.01522231  | 8.592148e-02 | ko04730 | Organismal Systems                   | Nervous system                      |
| 46 | <a href="#">GABAergic synapse</a>                                      | 110 (1.25%) | 212 (1.07%) | 0.01685084  | 9.304594e-02 | ko04727 | Organismal Systems                   | Nervous system                      |
| 47 | <a href="#">Dopaminergic synapse</a>                                   | 148 (1.68%) | 292 (1.48%) | 0.01764124  | 9.533777e-02 | ko04728 | Organismal Systems                   | Nervous system                      |
| 48 | <a href="#">Legionellosis</a>                                          | 73 (0.83%)  | 136 (0.69%) | 0.01846899  | 9.773174e-02 | ko05134 | Human Diseases                       | Infectious diseases: Bacterial      |
| 49 | <a href="#">Protein digestion and absorption</a>                       | 303 (3.45%) | 624 (3.16%) | 0.01933188  | 1.002102e-01 | ko04974 | Organismal Systems                   | Digestive system                    |
| 50 | <a href="#">Glutamatergic synapse</a>                                  | 112 (1.27%) | 218 (1.1%)  | 0.02253579  | 1.117004e-01 | ko04724 | Organismal Systems                   | Nervous system                      |
| 51 | <a href="#">Toxoplasmosis</a>                                          | 100 (1.14%) | 193 (0.98%) | 0.02283469  | 1.117004e-01 | ko05145 | Human Diseases                       | Infectious diseases: Parasitic      |
| 52 | <a href="#">Retrograde endocannabinoid signaling</a>                   | 111 (1.26%) | 216 (1.09%) | 0.02286780  | 1.117004e-01 | ko04723 | Organismal Systems                   | Nervous system                      |
| 53 | <a href="#">Arrhythmogenic right ventricular cardiomyopathy (ARVC)</a> | 63 (0.72%)  | 117 (0.59%) | 0.02508922  | 1.180287e-01 | ko05412 | Human Diseases                       | Cardiovascular diseases             |
| 54 | <a href="#">Type I diabetes mellitus</a>                               | 8 (0.09%)   | 10 (0.05%)  | 0.02509272  | 1.180287e-01 | ko04940 | Human Diseases                       | Endocrine and metabolic diseases    |
| 55 | <a href="#">Neuroactive ligand-receptor interaction</a>                | 223 (2.54%) | 455 (2.3%)  | 0.02610547  | 1.205598e-01 | ko04080 | Environmental Information Processing | Signaling molecules and interaction |
| 56 | <a href="#">Influenza A</a>                                            | 155 (1.76%) | 310 (1.57%) | 0.02679343  | 1.215273e-01 | ko05164 | Human Diseases                       | Infectious diseases: Viral          |
| 57 | <a href="#">Gap junction</a>                                           | 109 (1.24%) | 214 (1.08%) | 0.03186056  | 1.419751e-01 | ko04540 | Cellular Processes                   | Cell communication                  |
| 58 | <a href="#">Shigellosis</a>                                            | 90 (1.02%)  | 176 (0.89%) | 0.04266738  | 1.853152e-01 | ko05131 | Human Diseases                       | Infectious diseases: Bacterial      |
| 59 | <a href="#">ErbB signaling pathway</a>                                 | 99 (1.13%)  | 195 (0.99%) | 0.04304565  | 1.853152e-01 | ko04012 | Environmental Information Processing | Signal transduction                 |
| 60 | <a href="#">Fc gamma R-mediated phagocytosis</a>                       | 115 (1.31%) | 229 (1.16%) | 0.04408724  | 1.866360e-01 | ko04666 | Organismal Systems                   | Immune system                       |
| 61 | <a href="#">Synaptic vesicle cycle</a>                                 | 110 (1.25%) | 219 (1.11%) | 0.04774566  | 1.971348e-01 | ko04721 | Organismal Systems                   | Nervous system                      |
| 62 | <a href="#">mRNA surveillance pathway</a>                              | 169 (1.92%) | 345 (1.74%) | 0.04811953  | 1.971348e-01 | ko03015 | Genetic Information Processing       | Translation                         |
| 63 | <a href="#">Regulation of actin cytoskeleton</a>                       | 363 (4.13%) | 766 (3.87%) | 0.04984448  | 2.002273e-01 | ko04810 | Cellular Processes                   | Cell motility                       |
| 64 | <a href="#">Phototransduction - fly</a>                                | 98 (1.12%)  | 194 (0.98%) | 0.05045097  | 2.002273e-01 | ko04745 | Organismal Systems                   | Sensory system                      |
| 65 | <a href="#">Inositol phosphate metabolism</a>                          | 61 (0.69%)  | 117 (0.59%) | 0.05619881  | 2.196077e-01 | ko00562 | Metabolism                           | Carbohydrate metabolism             |
| 66 | <a href="#">Apoptosis</a>                                              | 45 (0.51%)  | 84 (0.42%)  | 0.05735088  | 2.207140e-01 | ko04210 | Cellular Processes                   | Cell growth and death               |
| 67 | <a href="#">Glioma</a>                                                 | 89 (1.01%)  | 177 (0.9%)  | 0.06712598  | 2.540511e-01 | ko05214 | Human Diseases                       | Cancers: Specific types             |
| 68 | <a href="#">Basal transcription factors</a>                            | 60 (0.68%)  | 116 (0.59%) | 0.06801367  | 2.540511e-01 | ko03022 | Genetic Information Processing       | Transcription                       |
| 69 | <a href="#">Amyotrophic lateral sclerosis (ALS)</a>                    | 123 (1.4%)  | 250 (1.26%) | 0.07162287  | 2.636552e-01 | ko05014 | Human Diseases                       | Neurodegenerative diseases          |



|     |                                                           |             |             |            |              |         |                                      |                                             |
|-----|-----------------------------------------------------------|-------------|-------------|------------|--------------|---------|--------------------------------------|---------------------------------------------|
| 70  | <a href="#">Renin-angiotensin system</a>                  | 42 (0.48%)  | 79 (0.4%)   | 0.07345429 | 2.665341e-01 | ko04614 | Organismal Systems                   | Endocrine system                            |
| 71  | <a href="#">Small cell lung cancer</a>                    | 126 (1.43%) | 258 (1.3%)  | 0.08505847 | 3.042937e-01 | ko05222 | Human Diseases                       | Cancers: Specific types                     |
| 72  | <a href="#">Taste transduction</a>                        | 44 (0.5%)   | 84 (0.42%)  | 0.08710842 | 3.071653e-01 | ko04742 | Organismal Systems                   | Sensory system                              |
| 73  | <a href="#">Leukocyte transendothelial migration</a>      | 117 (1.33%) | 239 (1.21%) | 0.0882798  | 3.071653e-01 | ko04670 | Organismal Systems                   | Immune system                               |
| 74  | <a href="#">Tuberculosis</a>                              | 175 (1.99%) | 365 (1.85%) | 0.09462265 | 3.213730e-01 | ko05152 | Human Diseases                       | Infectious diseases: Bacterial              |
| 75  | <a href="#">Chagas disease (American trypanosomiasis)</a> | 50 (0.57%)  | 97 (0.49%)  | 0.09489359 | 3.213730e-01 | ko05142 | Human Diseases                       | Infectious diseases: Parasitic              |
| 76  | <a href="#">Wnt signaling pathway</a>                     | 146 (1.66%) | 303 (1.53%) | 0.1022364  | 3.416848e-01 | ko04310 | Environmental Information Processing | Signal transduction                         |
| 77  | <a href="#">Systemic lupus erythematosus</a>              | 46 (0.52%)  | 90 (0.46%)  | 0.1204795  | 3.974259e-01 | ko05322 | Human Diseases                       | Immune diseases                             |
| 78  | <a href="#">Maturity onset diabetes of the young</a>      | 34 (0.39%)  | 65 (0.33%)  | 0.1239469  | 4.036220e-01 | ko04950 | Human Diseases                       | Endocrine and metabolic diseases            |
| 79  | <a href="#">Rheumatoid arthritis</a>                      | 56 (0.64%)  | 112 (0.57%) | 0.1366617  | 4.393933e-01 | ko05323 | Human Diseases                       | Immune diseases                             |
| 80  | <a href="#">MAPK signaling pathway</a>                    | 187 (2.13%) | 396 (2%)    | 0.1397795  | 4.437999e-01 | ko04010 | Environmental Information Processing | Signal transduction                         |
| 81  | <a href="#">Oocyte meiosis</a>                            | 157 (1.79%) | 333 (1.68%) | 0.1701126  | 5.285681e-01 | ko04114 | Cellular Processes                   | Cell growth and death                       |
| 82  | <a href="#">Circadian rhythm - fly</a>                    | 10 (0.11%)  | 17 (0.09%)  | 0.1706401  | 5.285681e-01 | ko04711 | Organismal Systems                   | Environmental adaptation                    |
| 83  | <a href="#">Leishmaniasis</a>                             | 26 (0.3%)   | 50 (0.25%)  | 0.1742012  | 5.289260e-01 | ko05140 | Human Diseases                       | Infectious diseases: Parasitic              |
| 84  | <a href="#">p53 signaling pathway</a>                     | 43 (0.49%)  | 86 (0.43%)  | 0.1749204  | 5.289260e-01 | ko04115 | Cellular Processes                   | Cell growth and death                       |
| 85  | <a href="#">Neurotrophin signaling pathway</a>            | 136 (1.55%) | 289 (1.46%) | 0.1977902  | 5.910437e-01 | ko04722 | Organismal Systems                   | Nervous system                              |
| 86  | <a href="#">MAPK signaling pathway - fly</a>              | 27 (0.31%)  | 53 (0.27%)  | 0.2062291  | 6.090952e-01 | ko04013 | Environmental Information Processing | Signal transduction                         |
| 87  | <a href="#">Glycosaminoglycan degradation</a>             | 14 (0.16%)  | 26 (0.13%)  | 0.2199982  | 6.422936e-01 | ko00531 | Metabolism                           | Glycan biosynthesis and metabolism          |
| 88  | <a href="#">Basal cell carcinoma</a>                      | 38 (0.43%)  | 78 (0.39%)  | 0.2569182  | 7.415593e-01 | ko05217 | Human Diseases                       | Cancers: Specific types                     |
| 89  | <a href="#">Phosphatidylinositol signaling system</a>     | 106 (1.21%) | 228 (1.15%) | 0.2854237  | 8.068121e-01 | ko04070 | Environmental Information Processing | Signal transduction                         |
| 90  | <a href="#">Fatty acid biosynthesis</a>                   | 13 (0.15%)  | 25 (0.13%)  | 0.2858783  | 8.068121e-01 | ko00061 | Metabolism                           | Lipid metabolism                            |
| 91  | <a href="#">Lysine degradation</a>                        | 104 (1.18%) | 224 (1.13%) | 0.2940191  | 8.206687e-01 | ko00310 | Metabolism                           | Amino acid metabolism                       |
| 92  | <a href="#">Pathways in cancer</a>                        | 357 (4.06%) | 787 (3.98%) | 0.3065453  | 8.463316e-01 | ko05200 | Human Diseases                       | Cancers: Overview                           |
| 93  | <a href="#">ABC transporters</a>                          | 66 (0.75%)  | 141 (0.71%) | 0.3122936  | 8.529309e-01 | ko02010 | Environmental Information Processing | Membrane transport                          |
| 94  | <a href="#">Collecting duct acid secretion</a>            | 33 (0.38%)  | 69 (0.35%)  | 0.3257073  | 8.801027e-01 | ko04966 | Organismal Systems                   | Excretory system                            |
| 95  | <a href="#">Caffeine metabolism</a>                       | 13 (0.15%)  | 26 (0.13%)  | 0.3517585  | 9.391965e-01 | ko00232 | Metabolism                           | Biosynthesis of other secondary metabolites |
| 96  | <a href="#">Osteoclast differentiation</a>                | 54 (0.61%)  | 116 (0.59%) | 0.3549719  | 9.391965e-01 | ko04380 | Organismal Systems                   | Development                                 |
| 97  | <a href="#">Pentose phosphate pathway</a>                 | 37 (0.42%)  | 79 (0.4%)   | 0.3735302  | 9.734596e-01 | ko00030 | Metabolism                           | Carbohydrate metabolism                     |
| 98  | <a href="#">Proteasome</a>                                | 55 (0.63%)  | 119 (0.6%)  | 0.3798541  | 9.734596e-01 | ko03050 | Genetic Information Processing       | Folding, sorting and degradation            |
| 99  | <a href="#">Complement and coagulation cascades</a>       | 31 (0.35%)  | 66 (0.33%)  | 0.3832478  | 9.734596e-01 | ko04610 | Organismal Systems                   | Immune system                               |
| 100 | <a href="#">Axon guidance</a>                             | 117 (1.33%) | 257 (1.3%)  | 0.3832518  | 9.734596e-01 | ko04360 | Organismal Systems                   | Development                                 |
| 101 | <a href="#">Base excision repair</a>                      | 30 (0.34%)  | 64 (0.32%)  | 0.392225   | 9.793156e-01 | ko03410 | Genetic Information Processing       | Replication and repair                      |
| 102 | <a href="#">Progesterone-mediated oocyte maturation</a>   | 101 (1.15%) | 222 (1.12%) | 0.3982541  | 9.793156e-01 | ko04914 | Organismal Systems                   | Endocrine system                            |

|     |                                                                  |             |             |           |              |         |                                      |                                           |
|-----|------------------------------------------------------------------|-------------|-------------|-----------|--------------|---------|--------------------------------------|-------------------------------------------|
| 103 | <a href="#">Measles</a>                                          | 79 (0.9%)   | 173 (0.87%) | 0.3989945 | 9.793156e-01 | ko05162 | Human Diseases                       | Infectious diseases: Viral                |
| 104 | <a href="#">Nucleotide excision repair</a>                       | 47 (0.54%)  | 102 (0.52%) | 0.4048352 | 9.793156e-01 | ko03420 | Genetic Information Processing       | Replication and repair                    |
| 105 | <a href="#">Glyoxylate and dicarboxylate metabolism</a>          | 47 (0.54%)  | 102 (0.52%) | 0.4048352 | 9.793156e-01 | ko00630 | Metabolism                           | Carbohydrate metabolism                   |
| 106 | <a href="#">Pyrimidine metabolism</a>                            | 124 (1.41%) | 274 (1.39%) | 0.4128348 | 9.892457e-01 | ko00240 | Metabolism                           | Nucleotide metabolism                     |
| 107 | <a href="#">Protein processing in endoplasmic reticulum</a>      | 211 (2.4%)  | 470 (2.38%) | 0.4353992 | 1.000000e+00 | ko04141 | Genetic Information Processing       | Folding, sorting and degradation          |
| 108 | <a href="#">Cytokine-cytokine receptor interaction</a>           | 21 (0.24%)  | 45 (0.23%)  | 0.4370963 | 1.000000e+00 | ko04060 | Environmental Information Processing | Signaling molecules and interaction       |
| 109 | <a href="#">Allograft rejection</a>                              | 1 (0.01%)   | 1 (0.01%)   | 0.4442253 | 1.000000e+00 | ko05330 | Human Diseases                       | Immune diseases                           |
| 110 | <a href="#">Graft-versus-host disease</a>                        | 1 (0.01%)   | 1 (0.01%)   | 0.4442253 | 1.000000e+00 | ko05332 | Human Diseases                       | Immune diseases                           |
| 111 | <a href="#">Selenocompound metabolism</a>                        | 11 (0.13%)  | 23 (0.12%)  | 0.4498165 | 1.000000e+00 | ko00450 | Metabolism                           | Metabolism of other amino acids           |
| 112 | <a href="#">Notch signaling pathway</a>                          | 48 (0.55%)  | 106 (0.54%) | 0.4664055 | 1.000000e+00 | ko04330 | Environmental Information Processing | Signal transduction                       |
| 113 | <a href="#">Insulin signaling pathway</a>                        | 189 (2.15%) | 423 (2.14%) | 0.4759296 | 1.000000e+00 | ko04910 | Organismal Systems                   | Endocrine system                          |
| 114 | <a href="#">Epstein-Barr virus infection</a>                     | 192 (2.19%) | 430 (2.17%) | 0.4804038 | 1.000000e+00 | ko05169 | Human Diseases                       | Infectious diseases: Viral                |
| 115 | <a href="#">Serotonergic synapse</a>                             | 120 (1.37%) | 269 (1.36%) | 0.4989401 | 1.000000e+00 | ko04726 | Organismal Systems                   | Nervous system                            |
| 116 | <a href="#">Adherens junction</a>                                | 147 (1.67%) | 330 (1.67%) | 0.5034025 | 1.000000e+00 | ko04520 | Cellular Processes                   | Cell communication                        |
| 117 | <a href="#">Glycosaminoglycan biosynthesis - heparan sulfate</a> | 19 (0.22%)  | 42 (0.21%)  | 0.517168  | 1.000000e+00 | ko00534 | Metabolism                           | Glycan biosynthesis and metabolism        |
| 118 | <a href="#">Prostate cancer</a>                                  | 93 (1.06%)  | 209 (1.06%) | 0.5181261 | 1.000000e+00 | ko05215 | Human Diseases                       | Cancers: Specific types                   |
| 119 | <a href="#">Porphyrin and chlorophyll metabolism</a>             | 57 (0.65%)  | 128 (0.65%) | 0.5243531 | 1.000000e+00 | ko00860 | Metabolism                           | Metabolism of cofactors and vitamins      |
| 120 | <a href="#">mTOR signaling pathway</a>                           | 49 (0.56%)  | 110 (0.56%) | 0.5265521 | 1.000000e+00 | ko04150 | Environmental Information Processing | Signal transduction                       |
| 121 | <a href="#">Non-small cell lung cancer</a>                       | 59 (0.67%)  | 133 (0.67%) | 0.5392918 | 1.000000e+00 | ko05223 | Human Diseases                       | Cancers: Specific types                   |
| 122 | <a href="#">Polyketide sugar unit biosynthesis</a>               | 3 (0.03%)   | 6 (0.03%)   | 0.5467876 | 1.000000e+00 | ko00523 | Metabolism                           | Metabolism of terpenoids and polyketides  |
| 123 | <a href="#">Amphetamine addiction</a>                            | 110 (1.25%) | 249 (1.26%) | 0.5558322 | 1.000000e+00 | ko05031 | Human Diseases                       | Substance dependence                      |
| 124 | <a href="#">Glycolysis / Gluconeogenesis</a>                     | 117 (1.33%) | 265 (1.34%) | 0.5594456 | 1.000000e+00 | ko00010 | Metabolism                           | Carbohydrate metabolism                   |
| 125 | <a href="#">Ascorbate and aldarate metabolism</a>                | 70 (0.8%)   | 159 (0.8%)  | 0.5708117 | 1.000000e+00 | ko00053 | Metabolism                           | Carbohydrate metabolism                   |
| 126 | <a href="#">Vitamin B6 metabolism</a>                            | 5 (0.06%)   | 11 (0.06%)  | 0.5876634 | 1.000000e+00 | ko00750 | Metabolism                           | Metabolism of cofactors and vitamins      |
| 127 | <a href="#">Pertussis</a>                                        | 46 (0.52%)  | 105 (0.53%) | 0.5876843 | 1.000000e+00 | ko05133 | Human Diseases                       | Infectious diseases: Bacterial            |
| 128 | <a href="#">Glycosphingolipid biosynthesis - ganglio series</a>  | 8 (0.09%)   | 18 (0.09%)  | 0.5892996 | 1.000000e+00 | ko00604 | Metabolism                           | Glycan biosynthesis and metabolism        |
| 129 | <a href="#">Drug metabolism - other enzymes</a>                  | 104 (1.18%) | 237 (1.2%)  | 0.5917125 | 1.000000e+00 | ko00983 | Metabolism                           | Xenobiotics biodegradation and metabolism |
| 130 | <a href="#">Nicotinate and nicotinamide metabolism</a>           | 21 (0.24%)  | 48 (0.24%)  | 0.5924202 | 1.000000e+00 | ko00760 | Metabolism                           | Metabolism of cofactors and vitamins      |
| 131 | <a href="#">D-Arginine and D-ornithine metabolism</a>            | 14 (0.16%)  | 32 (0.16%)  | 0.59783   | 1.000000e+00 | ko00472 | Metabolism                           | Metabolism of other amino acids           |
| 132 | <a href="#">Long-term potentiation</a>                           | 114 (1.3%)  | 261 (1.32%) | 0.6195086 | 1.000000e+00 | ko04720 | Organismal Systems                   | Nervous system                            |
| 133 | <a href="#">Homologous recombination</a>                         | 19 (0.22%)  | 44 (0.22%)  | 0.6224825 | 1.000000e+00 | ko03440 | Genetic Information Processing       | Replication and repair                    |
| 134 | <a href="#">Dorso-ventral axis formation</a>                     | 63 (0.72%)  | 145 (0.73%) | 0.624726  | 1.000000e+00 | ko04320 | Organismal Systems                   | Development                               |



|     |                                                                    |             |             |           |              |         |                                |                                          |
|-----|--------------------------------------------------------------------|-------------|-------------|-----------|--------------|---------|--------------------------------|------------------------------------------|
| 135 | <a href="#">Vasopressin-regulated water reabsorption</a>           | 45 (0.51%)  | 104 (0.53%) | 0.6303483 | 1.000000e+00 | ko04962 | Organismal Systems             | Excretory system                         |
| 136 | <a href="#">NOD-like receptor signaling pathway</a>                | 28 (0.32%)  | 65 (0.33%)  | 0.6327729 | 1.000000e+00 | ko04621 | Organismal Systems             | Immune system                            |
| 137 | <a href="#">Fc epsilon RI signaling pathway</a>                    | 61 (0.69%)  | 141 (0.71%) | 0.6407186 | 1.000000e+00 | ko04664 | Organismal Systems             | Immune system                            |
| 138 | <a href="#">HTLV-I infection</a>                                   | 201 (2.29%) | 460 (2.33%) | 0.6418567 | 1.000000e+00 | ko05166 | Human Diseases                 | Infectious diseases: Viral               |
| 139 | <a href="#">Arginine and proline metabolism</a>                    | 101 (1.15%) | 233 (1.18%) | 0.6540727 | 1.000000e+00 | ko00330 | Metabolism                     | Amino acid metabolism                    |
| 140 | <a href="#">RNA polymerase</a>                                     | 59 (0.67%)  | 137 (0.69%) | 0.6569479 | 1.000000e+00 | ko03020 | Genetic Information Processing | Transcription                            |
| 141 | <a href="#">Glycosphingolipid biosynthesis - globo series</a>      | 8 (0.09%)   | 19 (0.1%)   | 0.6647507 | 1.000000e+00 | ko00603 | Metabolism                     | Glycan biosynthesis and metabolism       |
| 142 | <a href="#">Circadian rhythm - mammal</a>                          | 19 (0.22%)  | 45 (0.23%)  | 0.6708903 | 1.000000e+00 | ko04710 | Organismal Systems             | Environmental adaptation                 |
| 143 | <a href="#">Melanoma</a>                                           | 34 (0.39%)  | 80 (0.4%)   | 0.6757388 | 1.000000e+00 | ko05218 | Human Diseases                 | Cancers: Specific types                  |
| 144 | <a href="#">Asthma</a>                                             | 1 (0.01%)   | 2 (0.01%)   | 0.691127  | 1.000000e+00 | ko05310 | Human Diseases                 | Immune diseases                          |
| 145 | <a href="#">Nicotine addiction</a>                                 | 48 (0.55%)  | 113 (0.57%) | 0.6947262 | 1.000000e+00 | ko05033 | Human Diseases                 | Substance dependence                     |
| 146 | <a href="#">Glycosaminoglycan biosynthesis—chondroitin sulfate</a> | 12 (0.14%)  | 29 (0.15%)  | 0.6952176 | 1.000000e+00 | ko00532 | Metabolism                     | Glycan biosynthesis and metabolism       |
| 147 | <a href="#">Malaria</a>                                            | 17 (0.19%)  | 41 (0.21%)  | 0.703337  | 1.000000e+00 | ko05144 | Human Diseases                 | Infectious diseases: Parasitic           |
| 148 | <a href="#">Valine, leucine and isoleucine biosynthesis</a>        | 14 (0.16%)  | 34 (0.17%)  | 0.708308  | 1.000000e+00 | ko00290 | Metabolism                     | Amino acid metabolism                    |
| 149 | <a href="#">Cell cycle</a>                                         | 124 (1.41%) | 289 (1.46%) | 0.7192413 | 1.000000e+00 | ko04110 | Cellular Processes             | Cell growth and death                    |
| 150 | <a href="#">Type II diabetes mellitus</a>                          | 36 (0.41%)  | 86 (0.43%)  | 0.720706  | 1.000000e+00 | ko04930 | Human Diseases                 | Endocrine and metabolic diseases         |
| 151 | <a href="#">Hepatitis C</a>                                        | 57 (0.65%)  | 135 (0.68%) | 0.7260495 | 1.000000e+00 | ko05160 | Human Diseases                 | Infectious diseases: Viral               |
| 152 | <a href="#">DNA replication</a>                                    | 35 (0.4%)   | 84 (0.42%)  | 0.7312281 | 1.000000e+00 | ko03030 | Genetic Information Processing | Replication and repair                   |
| 153 | <a href="#">Folate biosynthesis</a>                                | 18 (0.2%)   | 44 (0.22%)  | 0.7314347 | 1.000000e+00 | ko00790 | Metabolism                     | Metabolism of cofactors and vitamins     |
| 154 | <a href="#">Taurine and hypotaurine metabolism</a>                 | 7 (0.08%)   | 18 (0.09%)  | 0.759129  | 1.000000e+00 | ko00430 | Metabolism                     | Metabolism of other amino acids          |
| 155 | <a href="#">Pantothenate and CoA biosynthesis</a>                  | 16 (0.18%)  | 40 (0.2%)   | 0.7639636 | 1.000000e+00 | ko00770 | Metabolism                     | Metabolism of cofactors and vitamins     |
| 156 | <a href="#">Cocaine addiction</a>                                  | 46 (0.52%)  | 112 (0.57%) | 0.7909484 | 1.000000e+00 | ko05030 | Human Diseases                 | Substance dependence                     |
| 157 | <a href="#">RNA degradation</a>                                    | 68 (0.77%)  | 164 (0.83%) | 0.800609  | 1.000000e+00 | ko03018 | Genetic Information Processing | Folding, sorting and degradation         |
| 158 | <a href="#">Other types of O-glycan biosynthesis</a>               | 48 (0.55%)  | 118 (0.6%)  | 0.8194658 | 1.000000e+00 | ko00514 | Metabolism                     | Glycan biosynthesis and metabolism       |
| 159 | <a href="#">Natural killer cell mediated cytotoxicity</a>          | 52 (0.59%)  | 128 (0.65%) | 0.8305636 | 1.000000e+00 | ko04650 | Organismal Systems             | Immune system                            |
| 160 | <a href="#">Pyruvate metabolism</a>                                | 92 (1.05%)  | 222 (1.12%) | 0.8331586 | 1.000000e+00 | ko00620 | Metabolism                     | Carbohydrate metabolism                  |
| 161 | <a href="#">Endometrial cancer</a>                                 | 57 (0.65%)  | 140 (0.71%) | 0.8343074 | 1.000000e+00 | ko05213 | Human Diseases                 | Cancers: Specific types                  |
| 162 | <a href="#">Hematopoietic cell lineage</a>                         | 38 (0.43%)  | 95 (0.48%)  | 0.8346877 | 1.000000e+00 | ko04640 | Organismal Systems             | Immune system                            |
| 163 | <a href="#">Fat digestion and absorption</a>                       | 61 (0.69%)  | 150 (0.76%) | 0.8442    | 1.000000e+00 | ko04975 | Organismal Systems             | Digestive system                         |
| 164 | <a href="#">Pancreatic cancer</a>                                  | 39 (0.44%)  | 98 (0.5%)   | 0.8476057 | 1.000000e+00 | ko05212 | Human Diseases                 | Cancers: Specific types                  |
| 165 | <a href="#">Propanoate metabolism</a>                              | 62 (0.71%)  | 153 (0.77%) | 0.8546639 | 1.000000e+00 | ko00640 | Metabolism                     | Carbohydrate metabolism                  |
| 166 | <a href="#">Carbohydrate digestion and absorption</a>              | 51 (0.58%)  | 127 (0.64%) | 0.8555495 | 1.000000e+00 | ko04973 | Organismal Systems             | Digestive system                         |
| 167 | <a href="#">Insect hormone biosynthesis</a>                        | 4 (0.05%)   | 12 (0.06%)  | 0.8566835 | 1.000000e+00 | ko00981 | Metabolism                     | Metabolism of terpenoids and polyketides |
| 168 | <a href="#">PPAR signaling pathway</a>                             | 89 (1.01%)  | 217 (1.1%)  | 0.861123  | 1.000000e+00 | ko03320 | Organismal Systems             | Endocrine system                         |
| 169 | <a href="#">Riboflavin metabolism</a>                              | 25 (0.28%)  | 65 (0.33%)  | 0.8632479 | 1.000000e+00 | ko00740 | Metabolism                     | Metabolism of cofactors and vitamins     |

|     |                                                                            |             |             |           |              |         |                                      |                                          |
|-----|----------------------------------------------------------------------------|-------------|-------------|-----------|--------------|---------|--------------------------------------|------------------------------------------|
| 170 | <a href="#">Cytosolic DNA-sensing pathway</a>                              | 42 (0.48%)  | 106 (0.54%) | 0.8634934 | 1.000000e+00 | ko04623 | Organismal Systems                   | Immune system                            |
| 171 | <a href="#">Mineral absorption</a>                                         | 71 (0.81%)  | 175 (0.88%) | 0.8658602 | 1.000000e+00 | ko04978 | Organismal Systems                   | Digestive system                         |
| 172 | <a href="#">Chronic myeloid leukemia</a>                                   | 52 (0.59%)  | 130 (0.66%) | 0.8659895 | 1.000000e+00 | ko05220 | Human Diseases                       | Cancers: Specific types                  |
| 173 | <a href="#">Biosynthesis of unsaturated fatty acids</a>                    | 34 (0.39%)  | 87 (0.44%)  | 0.8674404 | 1.000000e+00 | ko01040 | Metabolism                           | Lipid metabolism                         |
| 174 | <a href="#">TGF-beta signaling pathway</a>                                 | 51 (0.58%)  | 128 (0.65%) | 0.8720987 | 1.000000e+00 | ko04350 | Environmental Information Processing | Signal transduction                      |
| 175 | <a href="#">Primary bile acid biosynthesis</a>                             | 17 (0.19%)  | 46 (0.23%)  | 0.8793335 | 1.000000e+00 | ko00120 | Metabolism                           | Lipid metabolism                         |
| 176 | <a href="#">T cell receptor signaling pathway</a>                          | 70 (0.8%)   | 174 (0.88%) | 0.8841625 | 1.000000e+00 | ko04660 | Organismal Systems                   | Immune system                            |
| 177 | <a href="#">Ubiquitin mediated proteolysis</a>                             | 129 (1.47%) | 313 (1.58%) | 0.8868602 | 1.000000e+00 | ko04120 | Genetic Information Processing       | Folding, sorting and degradation         |
| 178 | <a href="#">Thyroid cancer</a>                                             | 31 (0.35%)  | 81 (0.41%)  | 0.890885  | 1.000000e+00 | ko05216 | Human Diseases                       | Cancers: Specific types                  |
| 179 | <a href="#">Epithelial cell signaling in Helicobacter pylori infection</a> | 60 (0.68%)  | 151 (0.76%) | 0.8939781 | 1.000000e+00 | ko05120 | Human Diseases                       | Infectious diseases: Bacterial           |
| 180 | <a href="#">Protein export</a>                                             | 26 (0.3%)   | 69 (0.35%)  | 0.8950366 | 1.000000e+00 | ko03060 | Genetic Information Processing       | Folding, sorting and degradation         |
| 181 | <a href="#">Aldosterone-regulated sodium reabsorption</a>                  | 65 (0.74%)  | 163 (0.82%) | 0.8950612 | 1.000000e+00 | ko04960 | Organismal Systems                   | Excretory system                         |
| 182 | <a href="#">beta-Alanine metabolism</a>                                    | 47 (0.54%)  | 120 (0.61%) | 0.895603  | 1.000000e+00 | ko00410 | Metabolism                           | Metabolism of other amino acids          |
| 183 | <a href="#">Glutathione metabolism</a>                                     | 70 (0.8%)   | 175 (0.88%) | 0.896364  | 1.000000e+00 | ko00480 | Metabolism                           | Metabolism of other amino acids          |
| 184 | <a href="#">VEGF signaling pathway</a>                                     | 72 (0.82%)  | 180 (0.91%) | 0.8992129 | 1.000000e+00 | ko04370 | Environmental Information Processing | Signal transduction                      |
| 185 | <a href="#">Toll-like receptor signaling pathway</a>                       | 39 (0.44%)  | 101 (0.51%) | 0.8999602 | 1.000000e+00 | ko04620 | Organismal Systems                   | Immune system                            |
| 186 | <a href="#">Mucin type O-Glycan biosynthesis</a>                           | 15 (0.17%)  | 42 (0.21%)  | 0.9028875 | 1.000000e+00 | ko00512 | Metabolism                           | Glycan biosynthesis and metabolism       |
| 187 | <a href="#">Non-homologous end-joining</a>                                 | 6 (0.07%)   | 19 (0.1%)   | 0.9148106 | 1.000000e+00 | ko03450 | Genetic Information Processing       | Replication and repair                   |
| 188 | <a href="#">Bladder cancer</a>                                             | 19 (0.22%)  | 53 (0.27%)  | 0.919752  | 1.000000e+00 | ko05219 | Human Diseases                       | Cancers: Specific types                  |
| 189 | <a href="#">Terpenoid backbone biosynthesis</a>                            | 15 (0.17%)  | 43 (0.22%)  | 0.9225685 | 1.000000e+00 | ko00900 | Metabolism                           | Metabolism of terpenoids and polyketides |
| 190 | <a href="#">Sulfur metabolism</a>                                          | 11 (0.13%)  | 33 (0.17%)  | 0.9292739 | 1.000000e+00 | ko00920 | Metabolism                           | Energy metabolism                        |
| 191 | <a href="#">Fatty acid elongation</a>                                      | 31 (0.35%)  | 84 (0.42%)  | 0.9340648 | 1.000000e+00 | ko00062 | Metabolism                           | Lipid metabolism                         |
| 192 | <a href="#">N-Glycan biosynthesis</a>                                      | 39 (0.44%)  | 104 (0.53%) | 0.9369967 | 1.000000e+00 | ko00510 | Metabolism                           | Glycan biosynthesis and metabolism       |
| 193 | <a href="#">Butanoate metabolism</a>                                       | 39 (0.44%)  | 104 (0.53%) | 0.9369967 | 1.000000e+00 | ko00650 | Metabolism                           | Carbohydrate metabolism                  |
| 194 | <a href="#">Tryptophan metabolism</a>                                      | 91 (1.04%)  | 230 (1.16%) | 0.9408917 | 1.000000e+00 | ko00380 | Metabolism                           | Amino acid metabolism                    |
| 195 | <a href="#">Fanconi anemia pathway</a>                                     | 29 (0.33%)  | 80 (0.4%)   | 0.9447464 | 1.000000e+00 | ko03460 | Genetic Information Processing       | Replication and repair                   |
| 196 | <a href="#">Histidine metabolism</a>                                       | 33 (0.38%)  | 90 (0.46%)  | 0.9450861 | 1.000000e+00 | ko00340 | Metabolism                           | Amino acid metabolism                    |
| 197 | <a href="#">Thiamine metabolism</a>                                        | 1 (0.01%)   | 5 (0.03%)   | 0.9469948 | 1.000000e+00 | ko00730 | Metabolism                           | Metabolism of cofactors and vitamins     |
| 198 | <a href="#">NF-kappa B signaling pathway</a>                               | 43 (0.49%)  | 115 (0.58%) | 0.9477767 | 1.000000e+00 | ko04064 | Environmental Information Processing | Signal transduction                      |
| 199 | <a href="#">RIG-I-like receptor signaling pathway</a>                      | 17 (0.19%)  | 50 (0.25%)  | 0.9496323 | 1.000000e+00 | ko04622 | Organismal Systems                   | Immune system                            |
| 200 | <a href="#">Cyanoamino acid metabolism</a>                                 | 15 (0.17%)  | 45 (0.23%)  | 0.9519911 | 1.000000e+00 | ko00460 | Metabolism                           | Metabolism of other amino acids          |
| 201 | <a href="#">Acute myeloid leukemia</a>                                     | 33 (0.38%)  | 91 (0.46%)  | 0.9540838 | 1.000000e+00 | ko05221 | Human Diseases                       | Cancers: Specific types                  |
| 202 | <a href="#">Alanine, aspartate and glutamate metabolism</a>                | 37 (0.42%)  | 101 (0.51%) | 0.9544182 | 1.000000e+00 | ko00250 | Metabolism                           | Amino acid metabolism                    |
| 203 | <a href="#">Regulation of autophagy</a>                                    | 13 (0.15%)  | 40 (0.2%)   | 0.9550858 | 1.000000e+00 | ko04140 | Cellular Processes                   | Transport and catabolism                 |

|     |                                                                        |             |             |           |              |         |                                      |                                           |
|-----|------------------------------------------------------------------------|-------------|-------------|-----------|--------------|---------|--------------------------------------|-------------------------------------------|
| 204 | <a href="#">Ubiquinone and other terpenoid-quinone biosynthesis</a>    | 21 (0.24%)  | 61 (0.31%)  | 0.9569864 | 1.000000e+00 | ko00130 | Metabolism                           | Metabolism of cofactors and vitamins      |
| 205 | <a href="#">Drug metabolism - cytochrome P450</a>                      | 118 (1.34%) | 298 (1.51%) | 0.9602252 | 1.000000e+00 | ko00982 | Metabolism                           | Xenobiotics biodegradation and metabolism |
| 206 | <a href="#">Valine, leucine and isoleucine degradation</a>             | 81 (0.92%)  | 210 (1.06%) | 0.963483  | 1.000000e+00 | ko00280 | Metabolism                           | Amino acid metabolism                     |
| 207 | <a href="#">Steroid hormone biosynthesis</a>                           | 56 (0.64%)  | 150 (0.76%) | 0.9675774 | 1.000000e+00 | ko00140 | Metabolism                           | Lipid metabolism                          |
| 208 | <a href="#">D-Glutamine and D-glutamate metabolism</a>                 | 5 (0.06%)   | 19 (0.1%)   | 0.968733  | 1.000000e+00 | ko00471 | Metabolism                           | Metabolism of other amino acids           |
| 209 | <a href="#">Autoimmune thyroid disease</a>                             | 5 (0.06%)   | 19 (0.1%)   | 0.968733  | 1.000000e+00 | ko05320 | Human Diseases                       | Immune diseases                           |
| 210 | <a href="#">Synthesis and degradation of ketone bodies</a>             | 4 (0.05%)   | 16 (0.08%)  | 0.9688595 | 1.000000e+00 | ko00072 | Metabolism                           | Lipid metabolism                          |
| 211 | <a href="#">Glycosylphosphatidylinositol(GPI)-anch or biosynthesis</a> | 15 (0.17%)  | 47 (0.24%)  | 0.9711501 | 1.000000e+00 | ko00563 | Metabolism                           | Glycan biosynthesis and metabolism        |
| 212 | <a href="#">Glycine, serine and threonine metabolism</a>               | 41 (0.47%)  | 114 (0.58%) | 0.9732326 | 1.000000e+00 | ko00260 | Metabolism                           | Amino acid metabolism                     |
| 213 | <a href="#">Citrate cycle (TCA cycle)</a>                              | 67 (0.76%)  | 179 (0.91%) | 0.9760162 | 1.000000e+00 | ko00020 | Metabolism                           | Carbohydrate metabolism                   |
| 214 | <a href="#">Alcoholism</a>                                             | 133 (1.51%) | 339 (1.71%) | 0.9773698 | 1.000000e+00 | ko05034 | Human Diseases                       | Substance dependence                      |
| 215 | <a href="#">Phenylalanine, tyrosine and tryptophan biosynthesis</a>    | 8 (0.09%)   | 29 (0.15%)  | 0.980081  | 1.000000e+00 | ko00400 | Metabolism                           | Amino acid metabolism                     |
| 216 | <a href="#">Steroid biosynthesis</a>                                   | 13 (0.15%)  | 43 (0.22%)  | 0.980315  | 1.000000e+00 | ko00100 | Metabolism                           | Lipid metabolism                          |
| 217 | <a href="#">Tyrosine metabolism</a>                                    | 65 (0.74%)  | 177 (0.9%)  | 0.9846428 | 1.000000e+00 | ko00350 | Metabolism                           | Amino acid metabolism                     |
| 218 | <a href="#">Metabolism of xenobiotics by cytochrome P450</a>           | 119 (1.35%) | 310 (1.57%) | 0.986917  | 1.000000e+00 | ko00980 | Metabolism                           | Xenobiotics biodegradation and metabolism |
| 219 | <a href="#">B cell receptor signaling pathway</a>                      | 56 (0.64%)  | 156 (0.79%) | 0.9877532 | 1.000000e+00 | ko04662 | Organismal Systems                   | Immune system                             |
| 220 | <a href="#">Renal cell carcinoma</a>                                   | 66 (0.75%)  | 181 (0.92%) | 0.9879464 | 1.000000e+00 | ko05211 | Human Diseases                       | Cancers: Specific types                   |
| 221 | <a href="#">One carbon pool by folate</a>                              | 9 (0.1%)    | 34 (0.17%)  | 0.9902732 | 1.000000e+00 | ko00670 | Metabolism                           | Metabolism of cofactors and vitamins      |
| 222 | <a href="#">Purine metabolism</a>                                      | 202 (2.3%)  | 514 (2.6%)  | 0.992304  | 1.000000e+00 | ko00230 | Metabolism                           | Nucleotide metabolism                     |
| 223 | <a href="#">Fatty acid metabolism</a>                                  | 114 (1.3%)  | 302 (1.53%) | 0.992328  | 1.000000e+00 | ko00071 | Metabolism                           | Lipid metabolism                          |
| 224 | <a href="#">Pentose and glucuronate interconversions</a>               | 86 (0.98%)  | 235 (1.19%) | 0.9940098 | 1.000000e+00 | ko00040 | Metabolism                           | Carbohydrate metabolism                   |
| 225 | <a href="#">Cell adhesion molecules (CAMs)</a>                         | 51 (0.58%)  | 148 (0.75%) | 0.9947133 | 1.000000e+00 | ko04514 | Environmental Information Processing | Signaling molecules and interaction       |
| 226 | <a href="#">Proximal tubule bicarbonate reclamation</a>                | 41 (0.47%)  | 123 (0.62%) | 0.995388  | 1.000000e+00 | ko04964 | Organismal Systems                   | Excretory system                          |
| 227 | <a href="#">Glycosaminoglycan biosynthesis - keratan sulfate</a>       | 5 (0.06%)   | 24 (0.12%)  | 0.995819  | 1.000000e+00 | ko00533 | Metabolism                           | Glycan biosynthesis and metabolism        |
| 228 | <a href="#">Galactose metabolism</a>                                   | 27 (0.31%)  | 87 (0.44%)  | 0.9961774 | 1.000000e+00 | ko00052 | Metabolism                           | Carbohydrate metabolism                   |
| 229 | <a href="#">SNARE interactions in vesicular transport</a>              | 12 (0.14%)  | 46 (0.23%)  | 0.9967637 | 1.000000e+00 | ko04130 | Genetic Information Processing       | Folding, sorting and degradation          |
| 230 | <a href="#">Starch and sucrose metabolism</a>                          | 78 (0.89%)  | 219 (1.11%) | 0.996819  | 1.000000e+00 | ko00500 | Metabolism                           | Carbohydrate metabolism                   |
| 231 | <a href="#">Retinol metabolism</a>                                     | 114 (1.3%)  | 311 (1.57%) | 0.9978565 | 1.000000e+00 | ko00830 | Metabolism                           | Metabolism of cofactors and vitamins      |
| 232 | <a href="#">Lysosome</a>                                               | 301 (3.43%) | 764 (3.86%) | 0.9981312 | 1.000000e+00 | ko04142 | Cellular Processes                   | Transport and catabolism                  |

|     |                                                                            |               |               |           |              |         |                                      |                                    |
|-----|----------------------------------------------------------------------------|---------------|---------------|-----------|--------------|---------|--------------------------------------|------------------------------------|
| 233 | <a href="#">Fructose and mannose metabolism</a>                            | 53 (0.6%)     | 159 (0.8%)    | 0.9983592 | 1.000000e+00 | ko00051 | Metabolism                           | Carbohydrate metabolism            |
| 234 | <a href="#">Amino sugar and nucleotide sugar metabolism</a>                | 52 (0.59%)    | 157 (0.79%)   | 0.9985484 | 1.000000e+00 | ko00520 | Metabolism                           | Carbohydrate metabolism            |
| 235 | <a href="#">Mismatch repair</a>                                            | 18 (0.2%)     | 66 (0.33%)    | 0.9986553 | 1.000000e+00 | ko03430 | Genetic Information Processing       | Replication and repair             |
| 236 | <a href="#">Sphingolipid metabolism</a>                                    | 31 (0.35%)    | 103 (0.52%)   | 0.9989863 | 1.000000e+00 | ko00600 | Metabolism                           | Lipid metabolism                   |
| 237 | <a href="#">Glycosphingolipid biosynthesis - lacto and neolacto series</a> | 15 (0.17%)    | 59 (0.3%)     | 0.9992063 | 1.000000e+00 | ko00601 | Metabolism                           | Glycan biosynthesis and metabolism |
| 238 | <a href="#">Cysteine and methionine metabolism</a>                         | 44 (0.5%)     | 140 (0.71%)   | 0.9994003 | 1.000000e+00 | ko00270 | Metabolism                           | Amino acid metabolism              |
| 239 | <a href="#">Linoleic acid metabolism</a>                                   | 38 (0.43%)    | 124 (0.63%)   | 0.9994042 | 1.000000e+00 | ko00591 | Metabolism                           | Lipid metabolism                   |
| 240 | <a href="#">Colorectal cancer</a>                                          | 50 (0.57%)    | 156 (0.79%)   | 0.9994192 | 1.000000e+00 | ko05210 | Human Diseases                       | Cancers: Specific types            |
| 241 | <a href="#">Primary immunodeficiency</a>                                   | 1 (0.01%)     | 13 (0.07%)    | 0.9995188 | 1.000000e+00 | ko05340 | Human Diseases                       | Immune diseases                    |
| 242 | <a href="#">Jak-STAT signaling pathway</a>                                 | 31 (0.35%)    | 107 (0.54%)   | 0.9996493 | 1.000000e+00 | ko04630 | Environmental Information Processing | Signal transduction                |
| 243 | <a href="#">Phenylalanine metabolism</a>                                   | 41 (0.47%)    | 136 (0.69%)   | 0.9997756 | 1.000000e+00 | ko00360 | Metabolism                           | Amino acid metabolism              |
| 244 | <a href="#">Ether lipid metabolism</a>                                     | 29 (0.33%)    | 109 (0.55%)   | 0.9999606 | 1.000000e+00 | ko00565 | Metabolism                           | Lipid metabolism                   |
| 245 | <a href="#">Arachidonic acid metabolism</a>                                | 67 (0.76%)    | 213 (1.08%)   | 0.9999623 | 1.000000e+00 | ko00590 | Metabolism                           | Lipid metabolism                   |
| 246 | <a href="#">alpha-Linolenic acid metabolism</a>                            | 32 (0.36%)    | 121 (0.61%)   | 0.999986  | 1.000000e+00 | ko00592 | Metabolism                           | Lipid metabolism                   |
| 247 | <a href="#">Vitamin digestion and absorption</a>                           | 21 (0.24%)    | 94 (0.48%)    | 0.9999977 | 1.000000e+00 | ko04977 | Organismal Systems                   | Digestive system                   |
| 248 | <a href="#">Other glycan degradation</a>                                   | 17 (0.19%)    | 82 (0.41%)    | 0.9999981 | 1.000000e+00 | ko00511 | Metabolism                           | Glycan biosynthesis and metabolism |
| 249 | <a href="#">Glycerolipid metabolism</a>                                    | 69 (0.79%)    | 235 (1.19%)   | 0.9999993 | 1.000000e+00 | ko00561 | Metabolism                           | Lipid metabolism                   |
| 250 | <a href="#">Bile secretion</a>                                             | 148 (1.68%)   | 447 (2.26%)   | 0.9999997 | 1.000000e+00 | ko04976 | Organismal Systems                   | Digestive system                   |
| 251 | <a href="#">Adipocytokine signaling pathway</a>                            | 52 (0.59%)    | 191 (0.97%)   | 0.9999997 | 1.000000e+00 | ko04920 | Organismal Systems                   | Endocrine system                   |
| 252 | <a href="#">Peroxisome</a>                                                 | 119 (1.35%)   | 373 (1.89%)   | 0.9999998 | 1.000000e+00 | ko04146 | Cellular Processes                   | Transport and catabolism           |
| 253 | <a href="#">Metabolic pathways</a>                                         | 1361 (15.49%) | 3423 (17.31%) | 1         | 1.000000e+00 | ko01100 | Metabolism                           | Global map                         |
| 254 | <a href="#">Glycerophospholipid metabolism</a>                             | 79 (0.9%)     | 305 (1.54%)   | 1         | 1.000000e+00 | ko00564 | Metabolism                           | Lipid metabolism                   |

| # | Pathway                  | Differentially expressed genes                                                                                                                                                                                                                                                                                                                                                                                                                                                                                                                                                                                                                                                                                                                                                                                                                                                                                                                                                                                                                                                                                                                                                                                                                                                                                                                                                                                                                                                                                                                                                                                                                                                                                                                                                                                                                                                                                                                                                                                                                                                                                                                                                                                                                                                                                                                                                                                                                                                                                                                                                                                                                                                                                                                                                                                                                                                                                                                                                                                                                                                                                                                                                                                                                                                                                                                                                                                                                                                                                                                                                                                                                                                                                                                                                                                                                                                                                                                                                                                                                                                                                                                                                                                                                                                                                                                                                                                                                                                                                                                                                                                                                                                                                                                                                                                                                                                                                                                                                                                                                                                                                                                                                                                                                                                                                                                                                                                                                                                                                                                                                                                                                                                                                                                                                                                                                                                                                                                                                                                                                                                                                                                                                                                                                                                                                                                                                                                                                                                                                                                                                                                                                                                                                                                                                                             |
|---|--------------------------|------------------------------------------------------------------------------------------------------------------------------------------------------------------------------------------------------------------------------------------------------------------------------------------------------------------------------------------------------------------------------------------------------------------------------------------------------------------------------------------------------------------------------------------------------------------------------------------------------------------------------------------------------------------------------------------------------------------------------------------------------------------------------------------------------------------------------------------------------------------------------------------------------------------------------------------------------------------------------------------------------------------------------------------------------------------------------------------------------------------------------------------------------------------------------------------------------------------------------------------------------------------------------------------------------------------------------------------------------------------------------------------------------------------------------------------------------------------------------------------------------------------------------------------------------------------------------------------------------------------------------------------------------------------------------------------------------------------------------------------------------------------------------------------------------------------------------------------------------------------------------------------------------------------------------------------------------------------------------------------------------------------------------------------------------------------------------------------------------------------------------------------------------------------------------------------------------------------------------------------------------------------------------------------------------------------------------------------------------------------------------------------------------------------------------------------------------------------------------------------------------------------------------------------------------------------------------------------------------------------------------------------------------------------------------------------------------------------------------------------------------------------------------------------------------------------------------------------------------------------------------------------------------------------------------------------------------------------------------------------------------------------------------------------------------------------------------------------------------------------------------------------------------------------------------------------------------------------------------------------------------------------------------------------------------------------------------------------------------------------------------------------------------------------------------------------------------------------------------------------------------------------------------------------------------------------------------------------------------------------------------------------------------------------------------------------------------------------------------------------------------------------------------------------------------------------------------------------------------------------------------------------------------------------------------------------------------------------------------------------------------------------------------------------------------------------------------------------------------------------------------------------------------------------------------------------------------------------------------------------------------------------------------------------------------------------------------------------------------------------------------------------------------------------------------------------------------------------------------------------------------------------------------------------------------------------------------------------------------------------------------------------------------------------------------------------------------------------------------------------------------------------------------------------------------------------------------------------------------------------------------------------------------------------------------------------------------------------------------------------------------------------------------------------------------------------------------------------------------------------------------------------------------------------------------------------------------------------------------------------------------------------------------------------------------------------------------------------------------------------------------------------------------------------------------------------------------------------------------------------------------------------------------------------------------------------------------------------------------------------------------------------------------------------------------------------------------------------------------------------------------------------------------------------------------------------------------------------------------------------------------------------------------------------------------------------------------------------------------------------------------------------------------------------------------------------------------------------------------------------------------------------------------------------------------------------------------------------------------------------------------------------------------------------------------------------------------------------------------------------------------------------------------------------------------------------------------------------------------------------------------------------------------------------------------------------------------------------------------------------------------------------------------------------------------------------------------------------------------------------------------------------------------------------------------------|
| 1 | <a href="#">Ribosome</a> | <p>CL1053.Contig1_All, CL1053.Contig2_All, CL1074.Contig1_All, CL110.Contig11_All, CL110.Contig1_All, CL110.Contig3_All, CL110.Contig6_All, CL110.Contig7_All, CL110.Contig8_All, CL1244.Contig1_All, CL1321.Contig1_All, CL1321.Contig2_All, CL1351.Contig2_All, CL1523.Contig3_All, CL1523.Contig4_All, CL1642.Contig2_All, CL1703.Contig2_All, CL1703.Contig3_All, CL1703.Contig4_All, CL1828.Contig5_All, CL1928.Contig1_All, CL2081.Contig1_All, CL2221.Contig1_All, CL2283.Contig1_All, CL2283.Contig2_All, CL2320.Contig1_All, CL2320.Contig2_All, CL2434.Contig1_All, CL2676.Contig1_All, CL2806.Contig1_All, CL2961.Contig1_All, CL2961.Contig3_All, CL3021.Contig1_All, CL3021.Contig2_All, CL3036.Contig1_All, CL3093.Contig1_All, CL3189.Contig2_All, CL323.Contig1_All, CL3257.Contig1_All, CL3395.Contig1_All, CL3395.Contig2_All, CL343.Contig2_All, CL3447.Contig1_All, CL3733.Contig2_All, CL3733.Contig3_All, CL3762.Contig2_All, CL3762.Contig3_All, CL3894.Contig2_All, CL4125.Contig1_All, CL4130.Contig2_All, CL4135.Contig1_All, CL4170.Contig1_All, CL4170.Contig2_All, CL4286.Contig1_All, CL4425.Contig3_All, CL4529.Contig2_All, CL4581.Contig1_All, CL4581.Contig2_All, CL4681.Contig2_All, CL477.Contig1_All, CL4792.Contig2_All, CL4990.Contig2_All, CL5145.Contig2_All, CL5223.Contig1_All, CL5223.Contig2_All, CL5347.Contig1_All, CL5448.Contig1_All, CL616.Contig1_All, CL651.Contig1_All, CL661.Contig2_All, CL85.Contig1_All, CL993.Contig1_All, Unigene10115_All, Unigene10132_All, Unigene10215_All, Unigene10387_All, Unigene10416_All, Unigene10676_All, Unigene10677_All, Unigene10681_All, Unigene10682_All, Unigene10683_All, Unigene10690_All, Unigene10697_All, Unigene10772_All, Unigene10783_All, Unigene10789_All, Unigene10794_All, Unigene10795_All, Unigene10796_All, Unigene10797_All, Unigene10798_All, Unigene10799_All, Unigene10800_All, Unigene10806_All, Unigene10814_All, Unigene10815_All, Unigene10827_All, Unigene10828_All, Unigene10895_All, Unigene10896_All, Unigene10990_All, Unigene11015_All, Unigene11070_All, Unigene11089_All, Unigene11142_All, Unigene11143_All, Unigene11144_All, Unigene11154_All, Unigene11155_All, Unigene11291_All, Unigene11292_All, Unigene11383_All, Unigene11398_All, Unigene11399_All, Unigene11400_All, Unigene11487_All, Unigene11501_All, Unigene11618_All, Unigene11619_All, Unigene11621_All, Unigene11645_All, Unigene11646_All, Unigene11669_All, Unigene11691_All, Unigene11702_All, Unigene11703_All, Unigene11704_All, Unigene11705_All, Unigene11706_All, Unigene11707_All, Unigene11708_All, Unigene11709_All, Unigene11710_All, Unigene11712_All, Unigene11713_All, Unigene11714_All, Unigene11715_All, Unigene11716_All, Unigene11717_All, Unigene11718_All, Unigene11719_All, Unigene11722_All, Unigene11723_All, Unigene11725_All, Unigene11726_All, Unigene11727_All, Unigene11728_All, Unigene11731_All, Unigene11733_All, Unigene11734_All, Unigene11735_All, Unigene11737_All, Unigene11738_All, Unigene11739_All, Unigene11740_All, Unigene11742_All, Unigene11743_All, Unigene11745_All, Unigene11746_All, Unigene11747_All, Unigene11748_All, Unigene11749_All, Unigene11750_All, Unigene11751_All, Unigene11752_All, Unigene11753_All, Unigene11754_All, Unigene11755_All, Unigene11757_All, Unigene11758_All, Unigene11760_All, Unigene11761_All, Unigene11762_All, Unigene11764_All, Unigene11766_All, Unigene11771_All, Unigene11776_All, Unigene11776_All, Unigene11825_All, Unigene11835_All, Unigene12000_All, Unigene12119_All, Unigene12222_All, Unigene12260_All, Unigene12282_All, Unigene12306_All, Unigene12324_All, Unigene12333_All, Unigene12431_All, Unigene1244_All, Unigene12489_All, Unigene12504_All, Unigene12506_All, Unigene12514_All, Unigene12521_All, Unigene12531_All, Unigene12566_All, Unigene12626_All, Unigene12649_All, Unigene12653_All, Unigene12690_All, Unigene12726_All, Unigene12883_All, Unigene12908_All, Unigene12970_All, Unigene13090_All, Unigene13123_All, Unigene13133_All, Unigene13149_All, Unigene13164_All, Unigene13173_All, Unigene13213_All, Unigene13214_All, Unigene13489_All, Unigene13585_All, Unigene13620_All, Unigene1422_All, Unigene15131_All, Unigene15422_All, Unigene15508_All, Unigene15522_All, Unigene15523_All, Unigene15534_All, Unigene15569_All, Unigene15572_All, Unigene16094_All, Unigene16754_All, Unigene16756_All, Unigene16757_All, Unigene16759_All, Unigene16760_All, Unigene16762_All, Unigene16765_All, Unigene16792_All, Unigene16793_All, Unigene16858_All, Unigene16898_All, Unigene16969_All, Unigene17012_All, Unigene17039_All, Unigene1703_All, Unigene17225_All, Unigene17429_All, Unigene17455_All, Unigene17562_All, Unigene17563_All, Unigene17573_All, Unigene17599_All, Unigene17646_All, Unigene17665_All, Unigene17680_All, Unigene17711_All, Unigene17716_All, Unigene17719_All, Unigene17757_All, Unigene17758_All, Unigene17759_All, Unigene17761_All, Unigene17762_All, Unigene17767_All, Unigene17774_All, Unigene17779_All, Unigene17780_All, Unigene17782_All, Unigene17784_All, Unigene17789_All, Unigene17791_All, Unigene17996_All, Unigene18011_All, Unigene18020_All, Unigene18048_All, Unigene18049_All, Unigene18138_All, Unigene18150_All, Unigene18164_All, Unigene18198_All, Unigene18206_All, Unigene18207_All, Unigene18223_All, Unigene18242_All, Unigene18247_All, Unigene18269_All, Unigene18289_All, Unigene18302_All, Unigene18313_All, Unigene18327_All, Unigene18353_All, Unigene18383_All, Unigene18403_All, Unigene18476_All, Unigene18491_All, Unigene18498_All, Unigene18542_All, Unigene19006_All, Unigene19016_All, Unigene19017_All, Unigene19020_All, Unigene19023_All, Unigene19025_All, Unigene19029_All, Unigene19050_All, Unigene19271_All, Unigene19905_All, Unigene201_All, Unigene20636_All, Unigene20677_All, Unigene21409_All, Unigene2223_All, Unigene2227_All, Unigene2303_All, Unigene2561_All, Unigene2585_All, Unigene3339_All, Unigene3490_All, Unigene3612_All, Unigene3639_All, Unigene3649_All, Unigene444_All, Unigene4483_All, Unigene4605_All, Unigene5299_All, Unigene538_All, Unigene5524_All, Unigene6158_All, Unigene6179_All, Unigene6189_All, Unigene6257_All, Unigene629_All, Unigene6335_All, Unigene6421_All, Unigene6491_All, Unigene6520_All, Unigene6555_All, Unigene6593_All, Unigene6600_All, Unigene6607_All, Unigene6996_All, Unigene7366_All, Unigene7486_All, Unigene7571_All, Unigene7621_All, Unigene7624_All, Unigene8165_All, Unigene8219_All, Unigene8260_All, Unigene8363_All, Unigene8416_All, Unigene8543_All, Unigene8603_All, Unigene9243_All, Unigene9392_All, Unigene9397_All, Unigene9432_All, Unigene9484_All, Unigene9515_All, Unigene9574_All, Unigene9590_All, Unigene9689_All</p> |

CL1011.Contig1\_All, CL1011.Contig4\_All, CL1055.Contig1\_All, CL1055.Contig3\_All, CL1055.Contig4\_All, CL1055.Contig5\_All, CL1055.Contig6\_All, CL1055.Contig7\_All, CL1062.Contig1\_All, CL1066.Contig1\_All, CL1066.Contig2\_All, CL1066.Contig3\_All, CL1079.Contig4\_All, CL1116.Contig2\_All, CL1147.Contig1\_All, CL1147.Contig2\_All, CL1202.Contig1\_All, CL1202.Contig2\_All, CL1370.Contig3\_All, CL1436.Contig2\_All, CL1452.Contig1\_All, CL1495.Contig1\_All, CL1495.Contig2\_All, CL1503.Contig3\_All, CL1503.Contig4\_All, CL1503.Contig5\_All, CL1566.Contig2\_All, CL1613.Contig1\_All, CL1718.Contig1\_All, CL1718.Contig2\_All, CL1868.Contig1\_All, CL1868.Contig2\_All, CL1868.Contig4\_All, CL1890.Contig4\_All, CL2009.Contig2\_All, CL2066.Contig1\_All, CL209.Contig1\_All, CL209.Contig2\_All, CL209.Contig3\_All, CL209.Contig4\_All, CL2099.Contig1\_All, CL2105.Contig1\_All, CL2182.Contig1\_All, CL2182.Contig3\_All, CL2182.Contig4\_All, CL2252.Contig1\_All, CL2252.Contig2\_All, CL2252.Contig3\_All, CL2293.Contig1\_All, CL2297.Contig2\_All, CL2328.Contig1\_All, CL2424.Contig3\_All, CL2478.Contig2\_All, CL2481.Contig1\_All, CL2496.Contig1\_All, CL2611.Contig1\_All, CL2611.Contig2\_All, CL2698.Contig2\_All, CL2757.Contig2\_All, CL2927.Contig1\_All, CL2927.Contig3\_All, CL2930.Contig5\_All, CL2952.Contig1\_All, CL2979.Contig1\_All, CL3022.Contig2\_All, CL3145.Contig2\_All, CL3243.Contig1\_All, CL3243.Contig2\_All, CL3244.Contig1\_All, CL3248.Contig2\_All, CL326.Contig1\_All, CL3290.Contig2\_All, CL3290.Contig3\_All, CL3327.Contig1\_All, CL3327.Contig2\_All, CL3371.Contig1\_All, CL3387.Contig1\_All, CL3387.Contig2\_All, CL3442.Contig1\_All, CL3487.Contig6\_All, CL367.Contig1\_All, CL367.Contig2\_All, CL367.Contig3\_All, CL3690.Contig1\_All, CL3797.Contig1\_All, CL3797.Contig2\_All, CL387.Contig2\_All, CL39.Contig1\_All, CL39.Contig2\_All, CL39.Contig3\_All, CL39.Contig4\_All, CL4005.Contig2\_All, CL4005.Contig3\_All, CL4026.Contig1\_All, CL4042.Contig1\_All, CL4042.Contig2\_All, CL4042.Contig3\_All, CL4193.Contig1\_All, CL4399.Contig3\_All, CL4401.Contig2\_All, CL4401.Contig3\_All, CL4401.Contig4\_All, CL4491.Contig1\_All, CL4511.Contig1\_All, CL470.Contig1\_All, CL4844.Contig1\_All, CL4844.Contig2\_All, CL4879.Contig1\_All, CL4891.Contig1\_All, CL4891.Contig2\_All, CL4992.Contig1\_All, CL5048.Contig1\_All, CL5221.Contig1\_All, CL5268.Contig2\_All, CL5268.Contig3\_All, CL5280.Contig1\_All, CL5373.Contig1\_All, CL5373.Contig2\_All, CL5391.Contig1\_All, CL5391.Contig2\_All, CL5399.Contig1\_All, CL5399.Contig2\_All, CL5464.Contig1\_All, CL5464.Contig2\_All, CL5464.Contig3\_All, CL598.Contig1\_All, CL598.Contig2\_All, CL626.Contig1\_All, CL626.Contig2\_All, CL626.Contig3\_All, CL626.Contig4\_All, CL626.Contig6\_All, CL695.Contig16\_All, CL748.Contig1\_All, CL748.Contig3\_All, CL80.Contig1\_All, CL847.Contig1\_All, CL940.Contig3\_All, CL940.Contig5\_All, Unigene10012\_All, Unigene10058\_All, Unigene10093\_All, Unigene10095\_All, Unigene10096\_All, Unigene10123\_All, Unigene10200\_All, Unigene10238\_All, Unigene1024\_All, Unigene10254\_All, Unigene1026\_All, Unigene10316\_All, Unigene10469\_All, Unigene10623\_All, Unigene10723\_All, Unigene10724\_All, Unigene10779\_All, Unigene10787\_All, Unigene1096\_All, Unigene10974\_All, Unigene10983\_All, Unigene10984\_All, Unigene11093\_All, Unigene11094\_All, Unigene11097\_All, Unigene11141\_All, Unigene11160\_All, Unigene11190\_All, Unigene11203\_All, Unigene11222\_All, Unigene11337\_All, Unigene11338\_All, Unigene11358\_All, Unigene11377\_All, Unigene11436\_All, Unigene11447\_All, Unigene11448\_All, Unigene11469\_All, Unigene11510\_All, Unigene11511\_All, Unigene11515\_All, Unigene11538\_All, Unigene11543\_All, Unigene11544\_All, Unigene11557\_All, Unigene11565\_All, Unigene11576\_All, Unigene11578\_All, Unigene11587\_All, Unigene11588\_All, Unigene11589\_All, Unigene11590\_All, Unigene11629\_All, Unigene11648\_All, Unigene11660\_All, Unigene11662\_All, Unigene11672\_All, Unigene11687\_All, Unigene11797\_All, Unigene11810\_All, Unigene11880\_All, Unigene11985\_All, Unigene12016\_All, Unigene12017\_All, Unigene12118\_All, Unigene12125\_All, Unigene12154\_All, Unigene12155\_All, Unigene12194\_All, Unigene12210\_All, Unigene12212\_All, Unigene12285\_All, Unigene12315\_All, Unigene12357\_All, Unigene12435\_All, Unigene12533\_All, Unigene12537\_All, Unigene12692\_All, Unigene12710\_All, Unigene12793\_All, Unigene12853\_All, Unigene12974\_All, Unigene1322\_All, Unigene13324\_All, Unigene13732\_All, Unigene14133\_All, Unigene1488\_All, Unigene15320\_All, Unigene15658\_All, Unigene15814\_All, Unigene15815\_All, Unigene15824\_All, Unigene15840\_All, Unigene1614\_All, Unigene16558\_All, Unigene16580\_All, Unigene16659\_All, Unigene16965\_All, Unigene16966\_All, Unigene1704\_All, Unigene17111\_All, Unigene17321\_All, Unigene17327\_All, Unigene1757\_All, Unigene17596\_All, Unigene17679\_All, Unigene17727\_All, Unigene17728\_All, Unigene17731\_All, Unigene17798\_All, Unigene1792\_All, Unigene18063\_All, Unigene18488\_All, Unigene18496\_All, Unigene18873\_All, Unigene18898\_All, Unigene19237\_All, Unigene19303\_All, Unigene19360\_All, Unigene19426\_All, Unigene19840\_All, Unigene20095\_All, Unigene20128\_All, Unigene20912\_All, Unigene20912\_All, Unigene2105\_All, Unigene2180\_All, Unigene2190\_All, Unigene2209\_All, Unigene2251\_All, Unigene2297\_All, Unigene2503\_All, Unigene2560\_All, Unigene28\_All, Unigene3000\_All, Unigene3063\_All, Unigene3069\_All, Unigene3123\_All, Unigene3157\_All, Unigene3193\_All, Unigene3207\_All, Unigene3261\_All, Unigene3316\_All, Unigene3323\_All, Unigene3346\_All, Unigene3391\_All, Unigene3403\_All, Unigene3476\_All, Unigene3669\_All, Unigene3779\_All, Unigene3889\_All, Unigene3947\_All, Unigene3964\_All, Unigene4004\_All, Unigene4053\_All, Unigene4070\_All, Unigene4112\_All, Unigene414\_All, Unigene4218\_All, Unigene4305\_All, Unigene4359\_All, Unigene4418\_All, Unigene4444\_All, Unigene4532\_All, Unigene4825\_All, Unigene4922\_All, Unigene5059\_All, Unigene5086\_All, Unigene5121\_All, Unigene5169\_All, Unigene5233\_All, Unigene5265\_All, Unigene5589\_All, Unigene5799\_All, Unigene5799\_All, Unigene5889\_All, Unigene5913\_All, Unigene6009\_All, Unigene6050\_All, Unigene6076\_All, Unigene6098\_All, Unigene6145\_All, Unigene6305\_All, Unigene6326\_All, Unigene646\_All, Unigene6478\_All, Unigene65\_All, Unigene6741\_All, Unigene6780\_All, Unigene6886\_All, Unigene7054\_All, Unigene7106\_All, Unigene7280\_All, Unigene7431\_All, Unigene7440\_All, Unigene7534\_All, Unigene7560\_All, Unigene8102\_All, Unigene8151\_All, Unigene8179\_All, Unigene8204\_All, Unigene8231\_All, Unigene8262\_All, Unigene8324\_All, Unigene8399\_All, Unigene8422\_All, Unigene8514\_All, Unigene8537\_All, Unigene8562\_All, Unigene8936\_All, Unigene9040\_All, Unigene9042\_All, Unigene9161\_All, Unigene9271\_All, Unigene9284\_All, Unigene936\_All, Unigene9437\_All, Unigene9513\_All, Unigene955\_All, Unigene9611\_All, Unigene9733\_All, Unigene981\_All, Unigene9988\_All



|   |                                                       |                                                                                                                                                                                                                                                                                                                                                                                                                                                                                                                                                                                                                                                                                                                                                                                                                                                                                                                                                                                                                                                                                                                                                                                                                                                                                                                                                                                                                                                                                                                                                                                                                                                                                                                                                                                                                                                                                                                                                                                                                                                                                                                                                                                                                                                                                                                                                                                                                                                                                                                                                                                                                                                                                                                                                                                                                                                                                                                                                                                                                                                                                                                                                                                                                                                                                                                                                                                                                                                                                                                                                                                                                                                                                                                                                                                                                                                                                                                                                                                                                                                                        |
|---|-------------------------------------------------------|------------------------------------------------------------------------------------------------------------------------------------------------------------------------------------------------------------------------------------------------------------------------------------------------------------------------------------------------------------------------------------------------------------------------------------------------------------------------------------------------------------------------------------------------------------------------------------------------------------------------------------------------------------------------------------------------------------------------------------------------------------------------------------------------------------------------------------------------------------------------------------------------------------------------------------------------------------------------------------------------------------------------------------------------------------------------------------------------------------------------------------------------------------------------------------------------------------------------------------------------------------------------------------------------------------------------------------------------------------------------------------------------------------------------------------------------------------------------------------------------------------------------------------------------------------------------------------------------------------------------------------------------------------------------------------------------------------------------------------------------------------------------------------------------------------------------------------------------------------------------------------------------------------------------------------------------------------------------------------------------------------------------------------------------------------------------------------------------------------------------------------------------------------------------------------------------------------------------------------------------------------------------------------------------------------------------------------------------------------------------------------------------------------------------------------------------------------------------------------------------------------------------------------------------------------------------------------------------------------------------------------------------------------------------------------------------------------------------------------------------------------------------------------------------------------------------------------------------------------------------------------------------------------------------------------------------------------------------------------------------------------------------------------------------------------------------------------------------------------------------------------------------------------------------------------------------------------------------------------------------------------------------------------------------------------------------------------------------------------------------------------------------------------------------------------------------------------------------------------------------------------------------------------------------------------------------------------------------------------------------------------------------------------------------------------------------------------------------------------------------------------------------------------------------------------------------------------------------------------------------------------------------------------------------------------------------------------------------------------------------------------------------------------------------------------------------|
| 3 | <a href="#">Pathogenic Escherichia coli infection</a> | CL107.Contig3_All, CL1252.Contig6_All, CL1355.Contig1_All, CL1498.Contig1_All, CL1539.Contig1_All, CL1539.Contig2_All, CL1539.Contig3_All, CL1539.Contig4_All, CL156.Contig1_All, CL156.Contig3_All, CL156.Contig4_All, CL1723.Contig1_All, CL1723.Contig2_All, CL1723.Contig7_All, CL1803.Contig1_All, CL2049.Contig3_All, CL2085.Contig1_All, CL2182.Contig1_All, CL2182.Contig3_All, CL2182.Contig4_All, CL2224.Contig2_All, CL2224.Contig3_All, CL2224.Contig4_All, CL2375.Contig2_All, CL249.Contig1_All, CL249.Contig3_All, CL249.Contig5_All, CL249.Contig6_All, CL257.Contig1_All, CL257.Contig2_All, CL263.Contig3_All, CL271.Contig2_All, CL2923.Contig2_All, CL2975.Contig2_All, CL2977.Contig1_All, CL2977.Contig2_All, CL2986.Contig1_All, CL3027.Contig3_All, CL3315.Contig3_All, CL3315.Contig4_All, CL3489.Contig1_All, CL3510.Contig3_All, CL3696.Contig1_All, CL3823.Contig1_All, CL3823.Contig2_All, CL3848.Contig2_All, CL39.Contig1_All, CL39.Contig2_All, CL39.Contig3_All, CL39.Contig4_All, CL402.Contig1_All, CL4088.Contig2_All, CL4130.Contig1_All, CL4320.Contig3_All, CL4479.Contig2_All, CL4479.Contig3_All, CL4479.Contig5_All, CL4776.Contig1_All, CL4776.Contig2_All, CL5005.Contig1_All, CL5005.Contig2_All, CL5109.Contig1_All, CL5109.Contig2_All, CL5149.Contig1_All, CL5149.Contig2_All, CL5186.Contig2_All, CL5207.Contig2_All, CL5391.Contig1_All, CL5391.Contig2_All, CL5468.Contig3_All, CL621.Contig2_All, CL621.Contig4_All, CL621.Contig5_All, CL855.Contig1_All, CL855.Contig2_All, CL855.Contig3_All, CL940.Contig3_All, CL940.Contig5_All, Unigene10097_All, Unigene10125_All, Unigene10126_All, Unigene10128_All, Unigene1016_All, Unigene1017_All, Unigene10448_All, Unigene1050_All, Unigene10998_All, Unigene11082_All, Unigene11121_All, Unigene11130_All, Unigene11197_All, Unigene11202_All, Unigene11307_All, Unigene11369_All, Unigene11395_All, Unigene11459_All, Unigene11521_All, Unigene11597_All, Unigene11598_All, Unigene11599_All, Unigene1169_All, Unigene11874_All, Unigene11922_All, Unigene11992_All, Unigene12201_All, Unigene12203_All, Unigene12314_All, Unigene12522_All, Unigene12603_All, Unigene12684_All, Unigene13039_All, Unigene13060_All, Unigene13092_All, Unigene1447_All, Unigene15308_All, Unigene1538_All, Unigene16235_All, Unigene16840_All, Unigene16963_All, Unigene17404_All, Unigene18142_All, Unigene18598_All, Unigene18644_All, Unigene18674_All, Unigene18898_All, Unigene198_All, Unigene19920_All, Unigene20095_All, Unigene2741_All, Unigene2771_All, Unigene278_All, Unigene3176_All, Unigene3337_All, Unigene3457_All, Unigene3482_All, Unigene3945_All, Unigene4081_All, Unigene4207_All, Unigene420_All, Unigene5303_All, Unigene5448_All, Unigene5654_All, Unigene5727_All, Unigene5808_All, Unigene5873_All, Unigene6014_All, Unigene6029_All, Unigene615_All, Unigene649_All, Unigene6526_All, Unigene7001_All, Unigene7063_All, Unigene715_All, Unigene7213_All, Unigene7541_All, Unigene7767_All, Unigene783_All, Unigene7983_All, Unigene8103_All, Unigene8184_All, Unigene8775_All, Unigene9050_All, Unigene9137_All, Unigene9217_All, Unigene9374_All, Unigene9578_All, Unigene9604_All, Unigene9740_All, Unigene9785_All, Unigene9787_All, Unigene9855_All, Unigene9877_All, Unigene9902_All, Unigene9947_All, Unigene9972_All, Unigene9973_All, Unigene9984_All                                                                                                                                                                                                                                                                                                                                                                                                                                                                                                                                                                                                                                                                                       |
|   |                                                       | CL1075.Contig3_All, CL1079.Contig4_All, CL1087.Contig2_All, CL1087.Contig3_All, CL1132.Contig1_All, CL1132.Contig2_All, CL1141.Contig2_All, CL1355.Contig1_All, CL1452.Contig1_All, CL156.Contig1_All, CL156.Contig3_All, CL156.Contig4_All, CL1687.Contig4_All, CL1698.Contig2_All, CL1704.Contig1_All, CL1704.Contig2_All, CL1803.Contig1_All, CL2265.Contig1_All, CL2265.Contig2_All, CL2331.Contig2_All, CL2331.Contig3_All, CL2517.Contig4_All, CL2904.Contig1_All, CL2904.Contig2_All, CL3011.Contig1_All, CL3046.Contig1_All, CL3092.Contig1_All, CL3092.Contig2_All, CL3260.Contig1_All, CL3260.Contig2_All, CL3260.Contig3_All, CL3260.Contig4_All, CL3260.Contig5_All, CL3260.Contig7_All, CL3295.Contig1_All, CL3297.Contig1_All, CL3297.Contig2_All, CL3347.Contig1_All, CL3347.Contig2_All, CL3428.Contig1_All, CL3428.Contig2_All, CL3442.Contig1_All, CL349.Contig12_All, CL349.Contig3_All, CL349.Contig5_All, CL3543.Contig2_All, CL3543.Contig3_All, CL3543.Contig4_All, CL3554.Contig1_All, CL3590.Contig2_All, CL3672.Contig4_All, CL3761.Contig1_All, CL4005.Contig2_All, CL4005.Contig3_All, CL4187.Contig1_All, CL4250.Contig2_All, CL4262.Contig2_All, CL4332.Contig1_All, CL4332.Contig2_All, CL440.Contig3_All, CL440.Contig5_All, CL440.Contig6_All, CL4454.Contig3_All, CL4596.Contig1_All, CL470.Contig1_All, CL4992.Contig1_All, CL503.Contig2_All, CL503.Contig3_All, CL503.Contig4_All, CL503.Contig5_All, CL503.Contig6_All, CL503.Contig8_All, CL531.Contig1_All, CL5352.Contig1_All, CL5352.Contig2_All, CL5468.Contig3_All, CL573.Contig1_All, CL636.Contig1_All, CL636.Contig2_All, CL642.Contig1_All, CL642.Contig2_All, CL644.Contig1_All, CL703.Contig2_All, CL703.Contig3_All, CL703.Contig5_All, CL703.Contig6_All, CL923.Contig1_All, CL923.Contig2_All, CL923.Contig3_All, CL940.Contig3_All, CL940.Contig5_All, Unigene10040_All, Unigene10058_All, Unigene10201_All, Unigene10202_All, Unigene10471_All, Unigene11289_All, Unigene11298_All, Unigene11300_All, Unigene1131_All, Unigene11345_All, Unigene11597_All, Unigene11598_All, Unigene11599_All, Unigene11623_All, Unigene11923_All, Unigene11935_All, Unigene12418_All, Unigene12476_All, Unigene1257_All, Unigene12627_All, Unigene12658_All, Unigene12684_All, Unigene12697_All, Unigene12719_All, Unigene12828_All, Unigene13092_All, Unigene136_All, Unigene15271_All, Unigene15824_All, Unigene1633_All, Unigene16435_All, Unigene16510_All, Unigene16716_All, Unigene16874_All, Unigene16976_All, Unigene1705_All, Unigene17116_All, Unigene17117_All, Unigene17279_All, Unigene17362_All, Unigene17398_All, Unigene17697_All, Unigene17718_All, Unigene17773_All, Unigene17777_All, Unigene17824_All, Unigene18076_All, Unigene18106_All, Unigene18173_All, Unigene18215_All, Unigene18378_All, Unigene18598_All, Unigene18645_All, Unigene19289_All, Unigene19364_All, Unigene19453_All, Unigene19647_All, Unigene19738_All, Unigene19745_All, Unigene19866_All, Unigene20065_All, Unigene2020_All, Unigene20299_All, Unigene2029_All, Unigene2032_All, Unigene2052_All, Unigene20530_All, Unigene2053_All, Unigene20625_All, Unigene210_All, Unigene237_All, Unigene2503_All, Unigene2514_All, Unigene2741_All, Unigene278_All, Unigene2980_All, Unigene3061_All, Unigene3187_All, Unigene3300_All, Unigene3328_All, Unigene3407_All, Unigene3659_All, Unigene3696_All, Unigene3779_All, Unigene3945_All, Unigene4052_All, Unigene4112_All, Unigene4161_All, Unigene4207_All, Unigene4269_All, Unigene4406_All, Unigene4532_All, Unigene4692_All, Unigene4920_All, Unigene500_All, Unigene58_All, Unigene5994_All, Unigene6013_All, Unigene6037_All, Unigene6273_All, Unigene6284_All, Unigene6896_All, Unigene6907_All, Unigene7015_All, Unigene7063_All, Unigene7096_All, Unigene7129_All, Unigene7829_All, Unigene7854_All, Unigene785_All, Unigene8009_All, Unigene8482_All, Unigene8621_All, Unigene8830_All, Unigene8959_All, Unigene9039_All, Unigene9062_All, Unigene9076_All, Unigene9200_All, Unigene93_All, Unigene9722_All, Unigene9733_All |
| 4 | <a href="#">Dilated cardiomyopathy</a>                |                                                                                                                                                                                                                                                                                                                                                                                                                                                                                                                                                                                                                                                                                                                                                                                                                                                                                                                                                                                                                                                                                                                                                                                                                                                                                                                                                                                                                                                                                                                                                                                                                                                                                                                                                                                                                                                                                                                                                                                                                                                                                                                                                                                                                                                                                                                                                                                                                                                                                                                                                                                                                                                                                                                                                                                                                                                                                                                                                                                                                                                                                                                                                                                                                                                                                                                                                                                                                                                                                                                                                                                                                                                                                                                                                                                                                                                                                                                                                                                                                                                                        |

|   |                                |                                                                                                                                                                                                                                                                                                                                                                                                                                                                                                                                                                                                                                                                                                                                                                                                                                                                                                                                                                                                                                                                                                                                                                                                                                                                                                                                                                                                                                                                                                                                                                                                                                                                                                                                                                                                                                                                                                                                                                                                                                                                                                                                                                                                                                                                                                                                                                                                                                                                                                                                                                                                                                                                                                                                                                                                                                                                                                                                                                                                                                                                                                                                                                                                                                                                                                                                                                                                                                                                                                                                                                                                                                                                                                                                                                                                                                                                                                                                                                                                                                                                                                                                                                                                                                                                                                                                                                                                                                                                                                                                                                                                                                                                                                                                                                                                                                                                                                                                                                                                                                                                                                                                                                                                                                                                                                                                                                                                                                                                                                                                                                                                                                                                                                                                                                                                                                                                                                                                                                                                                                                                                                                                                                                                                                                                                                                                                                                                                                                                                                                                                                                                                                                                                                                                                                                                                                                                                                                                                                                                                                                                                                                                                                                                                                                                                                                                                                                                                                                                                                                                                                                                                                                                                                                                                                                                                                                                                                                                                                                                                                                                                                                                                                                                                                                                                                                                                                                                                                                                                                                                                                                                                                           |
|---|--------------------------------|-------------------------------------------------------------------------------------------------------------------------------------------------------------------------------------------------------------------------------------------------------------------------------------------------------------------------------------------------------------------------------------------------------------------------------------------------------------------------------------------------------------------------------------------------------------------------------------------------------------------------------------------------------------------------------------------------------------------------------------------------------------------------------------------------------------------------------------------------------------------------------------------------------------------------------------------------------------------------------------------------------------------------------------------------------------------------------------------------------------------------------------------------------------------------------------------------------------------------------------------------------------------------------------------------------------------------------------------------------------------------------------------------------------------------------------------------------------------------------------------------------------------------------------------------------------------------------------------------------------------------------------------------------------------------------------------------------------------------------------------------------------------------------------------------------------------------------------------------------------------------------------------------------------------------------------------------------------------------------------------------------------------------------------------------------------------------------------------------------------------------------------------------------------------------------------------------------------------------------------------------------------------------------------------------------------------------------------------------------------------------------------------------------------------------------------------------------------------------------------------------------------------------------------------------------------------------------------------------------------------------------------------------------------------------------------------------------------------------------------------------------------------------------------------------------------------------------------------------------------------------------------------------------------------------------------------------------------------------------------------------------------------------------------------------------------------------------------------------------------------------------------------------------------------------------------------------------------------------------------------------------------------------------------------------------------------------------------------------------------------------------------------------------------------------------------------------------------------------------------------------------------------------------------------------------------------------------------------------------------------------------------------------------------------------------------------------------------------------------------------------------------------------------------------------------------------------------------------------------------------------------------------------------------------------------------------------------------------------------------------------------------------------------------------------------------------------------------------------------------------------------------------------------------------------------------------------------------------------------------------------------------------------------------------------------------------------------------------------------------------------------------------------------------------------------------------------------------------------------------------------------------------------------------------------------------------------------------------------------------------------------------------------------------------------------------------------------------------------------------------------------------------------------------------------------------------------------------------------------------------------------------------------------------------------------------------------------------------------------------------------------------------------------------------------------------------------------------------------------------------------------------------------------------------------------------------------------------------------------------------------------------------------------------------------------------------------------------------------------------------------------------------------------------------------------------------------------------------------------------------------------------------------------------------------------------------------------------------------------------------------------------------------------------------------------------------------------------------------------------------------------------------------------------------------------------------------------------------------------------------------------------------------------------------------------------------------------------------------------------------------------------------------------------------------------------------------------------------------------------------------------------------------------------------------------------------------------------------------------------------------------------------------------------------------------------------------------------------------------------------------------------------------------------------------------------------------------------------------------------------------------------------------------------------------------------------------------------------------------------------------------------------------------------------------------------------------------------------------------------------------------------------------------------------------------------------------------------------------------------------------------------------------------------------------------------------------------------------------------------------------------------------------------------------------------------------------------------------------------------------------------------------------------------------------------------------------------------------------------------------------------------------------------------------------------------------------------------------------------------------------------------------------------------------------------------------------------------------------------------------------------------------------------------------------------------------------------------------------------------------------------------------------------------------------------------------------------------------------------------------------------------------------------------------------------------------------------------------------------------------------------------------------------------------------------------------------------------------------------------------------------------------------------------------------------------------------------------------------------------------------------------------------------------------------------------------------------------------------------------------------------------------------------------------------------------------------------------------------------------------------------------------------------------------------------------------------------------------------------------------------------------------------------------------------------------------------------------------------------------------------------------------|
| 5 | <a href="#">Focal adhesion</a> | <p>CL1011.Contig1_All, CL1011.Contig4_All, CL1055.Contig1_All, CL1055.Contig3_All, CL1055.Contig4_All, CL1055.Contig5_All, CL1055.Contig6_All, CL1055.Contig7_All, CL1066.Contig1_All, CL1066.Contig2_All, CL1066.Contig3_All, CL1068.Contig5_All, CL1092.Contig1_All, CL1099.Contig3_All, CL1120.Contig2_All, CL1147.Contig1_All, CL1147.Contig2_All, CL119.Contig10_All, CL119.Contig11_All, CL119.Contig3_All, CL119.Contig4_All, CL119.Contig8_All, CL119.Contig9_All, CL1202.Contig1_All, CL1202.Contig2_All, CL1355.Contig1_All, CL1436.Contig2_All, CL147.Contig6_All, CL1473.Contig1_All, CL1495.Contig1_All, CL1495.Contig2_All, CL1503.Contig3_All, CL1503.Contig4_All, CL1503.Contig5_All, CL1535.Contig3_All, CL1548.Contig2_All, CL1548.Contig3_All, CL156.Contig1_All, CL156.Contig3_All, CL156.Contig4_All, CL1563.Contig2_All, CL1566.Contig1_All, CL1566.Contig2_All, CL1718.Contig1_All, CL1718.Contig2_All, CL1795.Contig5_All, CL1803.Contig1_All, CL1807.Contig1_All, CL1807.Contig2_All, CL1843.Contig3_All, CL1874.Contig2_All, CL1890.Contig4_All, CL1954.Contig1_All, CL1954.Contig2_All, CL2009.Contig2_All, CL2039.Contig1_All, CL2061.Contig1_All, CL2066.Contig1_All, CL209.Contig1_All, CL209.Contig2_All, CL209.Contig3_All, CL209.Contig4_All, CL2099.Contig1_All, CL2182.Contig1_All, CL2182.Contig3_All, CL2182.Contig4_All, CL2224.Contig2_All, CL2224.Contig3_All, CL2224.Contig4_All, CL2252.Contig1_All, CL2252.Contig2_All, CL2252.Contig3_All, CL2297.Contig2_All, CL2331.Contig2_All, CL2331.Contig3_All, CL241.Contig1_All, CL241.Contig7_All, CL244.Contig2_All, CL2552.Contig3_All, CL257.Contig1_All, CL257.Contig2_All, CL2611.Contig1_All, CL2611.Contig2_All, CL2658.Contig1_All, CL2658.Contig2_All, CL271.Contig2_All, CL2722.Contig1_All, CL2833.Contig1_All, CL2927.Contig1_All, CL2927.Contig3_All, CL2952.Contig1_All, CL296.Contig16_All, CL3042.Contig1_All, CL3042.Contig3_All, CL305.Contig2_All, CL309.Contig2_All, CL309.Contig3_All, CL309.Contig4_All, CL3116.Contig2_All, CL3327.Contig1_All, CL3327.Contig2_All, CL3371.Contig1_All, CL3387.Contig1_All, CL3387.Contig2_All, CL3500.Contig1_All, CL3525.Contig1_All, CL3525.Contig2_All, CL3622.Contig2_All, CL367.Contig1_All, CL367.Contig2_All, CL367.Contig3_All, CL3689.Contig2_All, CL3797.Contig1_All, CL3797.Contig2_All, CL3823.Contig1_All, CL3823.Contig2_All, CL3879.Contig2_All, CL39.Contig1_All, CL39.Contig2_All, CL39.Contig3_All, CL39.Contig4_All, CL392.Contig1_All, CL392.Contig2_All, CL392.Contig3_All, CL400.Contig1_All, CL400.Contig2_All, CL4002.Contig1_All, CL4026.Contig1_All, CL4042.Contig1_All, CL4042.Contig2_All, CL4042.Contig3_All, CL4203.Contig3_All, CL4216.Contig1_All, CL4216.Contig2_All, CL4381.Contig1_All, CL4401.Contig2_All, CL4401.Contig3_All, CL4401.Contig4_All, CL4402.Contig1_All, CL4439.Contig2_All, CL4511.Contig1_All, CL4559.Contig2_All, CL4559.Contig3_All, CL4637.Contig1_All, CL4654.Contig2_All, CL4690.Contig1_All, CL4690.Contig2_All, CL470.Contig1_All, CL4736.Contig1_All, CL4736.Contig2_All, CL4787.Contig1_All, CL4844.Contig1_All, CL4844.Contig2_All, CL4862.Contig1_All, CL498.Contig2_All, CL498.Contig4_All, CL4992.Contig1_All, CL5048.Contig1_All, CL5061.Contig2_All, CL5115.Contig1_All, CL5162.Contig1_All, CL5162.Contig2_All, CL5212.Contig1_All, CL5212.Contig2_All, CL5221.Contig1_All, CL5222.Contig2_All, CL5239.Contig1_All, CL5246.Contig3_All, CL5268.Contig2_All, CL5268.Contig3_All, CL5330.Contig1_All, CL5330.Contig2_All, CL5361.Contig2_All, CL5361.Contig4_All, CL5373.Contig1_All, CL5373.Contig2_All, CL5391.Contig1_All, CL5391.Contig2_All, CL5464.Contig1_All, CL5464.Contig2_All, CL5464.Contig3_All, CL5468.Contig3_All, CL5469.Contig2_All, CL571.Contig2_All, CL577.Contig1_All, CL577.Contig2_All, CL695.Contig16_All, CL741.Contig2_All, CL748.Contig1_All, CL748.Contig3_All, CL80.Contig1_All, CL903.Contig1_All, CL916.Contig2_All, CL940.Contig3_All, CL940.Contig5_All, CL95.Contig1_All, CL970.Contig2_All, Unigene10012_All, Unigene10093_All, Unigene10095_All, Unigene10096_All, Unigene10123_All, Unigene10174_All, Unigene10200_All, Unigene10238_All, Unigene10254_All, Unigene10316_All, Unigene1040_All, Unigene10623_All, Unigene10723_All, Unigene10724_All, Unigene10779_All, Unigene10787_All, Unigene1096_All, Unigene10974_All, Unigene10983_All, Unigene10984_All, Unigene10991_All, Unigene11034_All, Unigene11097_All, Unigene11141_All, Unigene11160_All, Unigene11190_All, Unigene11203_All, Unigene11307_All, Unigene11337_All, Unigene11338_All, Unigene11358_All, Unigene11377_All, Unigene1137_All, Unigene11436_All, Unigene11447_All, Unigene11448_All, Unigene11469_All, Unigene11510_All, Unigene11511_All, Unigene11515_All, Unigene11538_All, Unigene11543_All, Unigene11544_All, Unigene11565_All, Unigene11576_All, Unigene11587_All, Unigene11588_All, Unigene11589_All, Unigene11590_All, Unigene11597_All, Unigene11598_All, Unigene11599_All, Unigene11628_All, Unigene11629_All, Unigene11648_All, Unigene11662_All, Unigene11672_All, Unigene11677_All, Unigene11687_All, Unigene1168_All, Unigene11797_All, Unigene11922_All, Unigene11985_All, Unigene12118_All, Unigene12125_All, Unigene12154_All, Unigene12155_All, Unigene12194_All, Unigene12210_All, Unigene12212_All, Unigene12435_All, Unigene12533_All, Unigene12537_All, Unigene1257_All, Unigene12684_All, Unigene12692_All, Unigene12710_All, Unigene12810_All, Unigene12974_All, Unigene13036_All, Unigene13092_All, Unigene13209_All, Unigene14133_All, Unigene1447_All, Unigene1479_All, Unigene1512_All, Unigene15513_All, Unigene15658_All, Unigene15840_All, Unigene16098_All, Unigene1614_All, Unigene1679_All, Unigene16965_All, Unigene16966_All, Unigene16994_All, Unigene17679_All, Unigene17728_All, Unigene17751_All, Unigene17815_All, Unigene17851_All, Unigene1792_All, Unigene1799_All, Unigene18178_All, Unigene18276_All, Unigene18317_All, Unigene18488_All, Unigene18496_All, Unigene1855_All, Unigene18598_All, Unigene18644_All, Unigene18873_All, Unigene18898_All, Unigene19237_All, Unigene1941_All, Unigene19426_All, Unigene19601_All, Unigene1974_All, Unigene19840_All, Unigene20111_All, Unigene20578_All, Unigene2067_All, Unigene20_All, Unigene21008_All, Unigene2145_All, Unigene214_All, Unigene2180_All, Unigene2190_All, Unigene220_All, Unigene2233_All, Unigene2251_All, Unigene2297_All, Unigene236_All, Unigene247_All, Unigene24_All, Unigene2503_All, Unigene2560_All, Unigene2741_All, Unigene2742_All, Unigene2749_All, Unigene278_All, Unigene28_All, Unigene3000_All, Unigene3063_All, Unigene3066_All, Unigene3070_All, Unigene3088_All, Unigene3123_All, Unigene3193_All, Unigene3261_All, Unigene3327_All, Unigene3316_All, Unigene3323_All, Unigene3346_All, Unigene3403_All, Unigene3471_All, Unigene352_All, Unigene3669_All, Unigene3889_All, Unigene3902_All, Unigene3945_All, Unigene3947_All, Unigene3964_All, Unigene4004_All, Unigene4022_All, Unigene4074_All, Unigene414_All, Unigene4207_All, Unigene4218_All, Unigene4418_All, Unigene4825_All, Unigene4922_All, Unigene4935_All, Unigene4970_All, Unigene5059_All, Unigene5088_All, Unigene5096_All, Unigene5108_All, Unigene5121_All, Unigene5169_All, Unigene5727_All, Unigene5799_All, Unigene579_All, Unigene5808_All, Unigene5813_All, Unigene5821_All, Unigene5889_All, Unigene5993_All, Unigene6059_All, Unigene6073_All, Unigene6076_All, Unigene6101_All, Unigene6283_All, Unigene6525_All, Unigene6655_All, Unigene6780_All, Unigene6886_All, Unigene6994_All, Unigene6999_All, Unigene7016_All, Unigene7029_All, Unigene7054_All, Unigene7063_All, Unigene7094_All, Unigene7100_All, Unigene7106_All, Unigene7136_All, Unigene7220_All, Unigene7280_All, Unigene7297_All, Unigene7431_All, Unigene7440_All, Unigene7534_All, Unigene7547_All, Unigene7560_All, Unigene7667_All, Unigene7704_All, Unigene7759_All, Unigene783_All, Unigene7993_All, Unigene8017_All, Unigene8046_All, Unigene8102_All, Unigene8179_All, Unigene8204_All, Unigene8231_All, Unigene8262_All, Unigene8324_All, Unigene8399_All, Unigene8514_All, Unigene8537_All, Unigene8562_All, Unigene8585_All, Unigene8615_All, Unigene8725_All, Unigene8747_All, Unigene8784_All, Unigene8933_All, Unigene8936_All, Unigene9014_All, Unigene9042_All, Unigene9050_All, Unigene9059_All, Unigene9125_All, Unigene9258_All, Unigene9284_All, Unigene936_All, Unigene9379_All, Unigene9611_All, Unigene9693_All, Unigene9719_All, Unigene9836_All, Unigene9877_All, Unigene9904_All, Unigene9988_All</p> |
|---|--------------------------------|-------------------------------------------------------------------------------------------------------------------------------------------------------------------------------------------------------------------------------------------------------------------------------------------------------------------------------------------------------------------------------------------------------------------------------------------------------------------------------------------------------------------------------------------------------------------------------------------------------------------------------------------------------------------------------------------------------------------------------------------------------------------------------------------------------------------------------------------------------------------------------------------------------------------------------------------------------------------------------------------------------------------------------------------------------------------------------------------------------------------------------------------------------------------------------------------------------------------------------------------------------------------------------------------------------------------------------------------------------------------------------------------------------------------------------------------------------------------------------------------------------------------------------------------------------------------------------------------------------------------------------------------------------------------------------------------------------------------------------------------------------------------------------------------------------------------------------------------------------------------------------------------------------------------------------------------------------------------------------------------------------------------------------------------------------------------------------------------------------------------------------------------------------------------------------------------------------------------------------------------------------------------------------------------------------------------------------------------------------------------------------------------------------------------------------------------------------------------------------------------------------------------------------------------------------------------------------------------------------------------------------------------------------------------------------------------------------------------------------------------------------------------------------------------------------------------------------------------------------------------------------------------------------------------------------------------------------------------------------------------------------------------------------------------------------------------------------------------------------------------------------------------------------------------------------------------------------------------------------------------------------------------------------------------------------------------------------------------------------------------------------------------------------------------------------------------------------------------------------------------------------------------------------------------------------------------------------------------------------------------------------------------------------------------------------------------------------------------------------------------------------------------------------------------------------------------------------------------------------------------------------------------------------------------------------------------------------------------------------------------------------------------------------------------------------------------------------------------------------------------------------------------------------------------------------------------------------------------------------------------------------------------------------------------------------------------------------------------------------------------------------------------------------------------------------------------------------------------------------------------------------------------------------------------------------------------------------------------------------------------------------------------------------------------------------------------------------------------------------------------------------------------------------------------------------------------------------------------------------------------------------------------------------------------------------------------------------------------------------------------------------------------------------------------------------------------------------------------------------------------------------------------------------------------------------------------------------------------------------------------------------------------------------------------------------------------------------------------------------------------------------------------------------------------------------------------------------------------------------------------------------------------------------------------------------------------------------------------------------------------------------------------------------------------------------------------------------------------------------------------------------------------------------------------------------------------------------------------------------------------------------------------------------------------------------------------------------------------------------------------------------------------------------------------------------------------------------------------------------------------------------------------------------------------------------------------------------------------------------------------------------------------------------------------------------------------------------------------------------------------------------------------------------------------------------------------------------------------------------------------------------------------------------------------------------------------------------------------------------------------------------------------------------------------------------------------------------------------------------------------------------------------------------------------------------------------------------------------------------------------------------------------------------------------------------------------------------------------------------------------------------------------------------------------------------------------------------------------------------------------------------------------------------------------------------------------------------------------------------------------------------------------------------------------------------------------------------------------------------------------------------------------------------------------------------------------------------------------------------------------------------------------------------------------------------------------------------------------------------------------------------------------------------------------------------------------------------------------------------------------------------------------------------------------------------------------------------------------------------------------------------------------------------------------------------------------------------------------------------------------------------------------------------------------------------------------------------------------------------------------------------------------------------------------------------------------------------------------------------------------------------------------------------------------------------------------------------------------------------------------------------------------------------------------------------------------------------------------------------------------------------------------------------------------------------------------------------------------------------------------------------------------|

CL1087.Contig2\_All, CL1087.Contig3\_All, CL1146.Contig2\_All, CL1146.Contig3\_All, CL1286.Contig2\_All, CL142.Contig1\_All, CL142.Contig2\_All, CL142.Contig5\_All, CL1581.Contig2\_All, CL1594.Contig1\_All, CL1798.Contig1\_All, CL1798.Contig2\_All, CL1823.Contig8\_All, CL1843.Contig3\_All, CL1995.Contig1\_All, CL1995.Contig2\_All, CL1995.Contig3\_All, CL2017.Contig4\_All, CL2017.Contig5\_All, CL2131.Contig4\_All, CL2131.Contig5\_All, CL2131.Contig6\_All, CL2131.Contig8\_All, CL2164.Contig2\_All, CL2253.Contig2\_All, CL2468.Contig1\_All, CL2468.Contig2\_All, CL2678.Contig1\_All, CL2678.Contig2\_All, CL2882.Contig1\_All, CL2882.Contig2\_All, CL2930.Contig5\_All, CL3019.Contig2\_All, CL3019.Contig3\_All, CL3019.Contig4\_All, CL3106.Contig1\_All, CL3135.Contig1\_All, CL3135.Contig2\_All, CL3135.Contig3\_All, CL3350.Contig1\_All, CL3350.Contig2\_All, CL345.Contig1\_All, CL3667.Contig1\_All, CL3667.Contig2\_All, CL3667.Contig3\_All, CL3730.Contig1\_All, CL3941.Contig1\_All, CL4304.Contig1\_All, CL4304.Contig2\_All, CL4365.Contig1\_All, CL4395.Contig1\_All, CL4509.Contig1\_All, CL4509.Contig2\_All, CL4521.Contig1\_All, CL4521.Contig2\_All, CL4521.Contig3\_All, CL4521.Contig5\_All, CL4628.Contig1\_All, CL4663.Contig1\_All, CL4872.Contig1\_All, CL4872.Contig2\_All, CL4881.Contig2\_All, CL4918.Contig1\_All, CL5012.Contig1\_All, CL5064.Contig2\_All, CL5078.Contig12\_All, CL5078.Contig8\_All, CL5260.Contig1\_All, CL527.Contig2\_All, CL527.Contig3\_All, CL5299.Contig1\_All, CL5337.Contig2\_All, CL5399.Contig1\_All, CL5399.Contig2\_All, CL691.Contig1\_All, CL772.Contig1\_All, CL772.Contig2\_All, CL823.Contig1\_All, CL851.Contig3\_All, CL870.Contig4\_All, CL870.Contig8\_All, CL870.Contig9\_All, CL898.Contig1\_All, CL898.Contig2\_All, CL962.Contig3\_All, Unigene10006\_All, Unigene10037\_All, Unigene10040\_All, Unigene10073\_All, Unigene10338\_All, Unigene10373\_All, Unigene10471\_All, Unigene10570\_All, Unigene10574\_All, Unigene10674\_All, Unigene10675\_All, Unigene10716\_All, Unigene10839\_All, Unigene10846\_All, Unigene10849\_All, Unigene10856\_All, Unigene10913\_All, Unigene10919\_All, Unigene10962\_All, Unigene10968\_All, Unigene10975\_All, Unigene10988\_All, Unigene10989\_All, Unigene11009\_All, Unigene11010\_All, Unigene11028\_All, Unigene11046\_All, Unigene11047\_All, Unigene11054\_All, Unigene11074\_All, Unigene11103\_All, Unigene11104\_All, Unigene11107\_All, Unigene11108\_All, Unigene11109\_All, Unigene11136\_All, Unigene11148\_All, Unigene11149\_All, Unigene11158\_All, Unigene11404\_All, Unigene11415\_All, Unigene11440\_All, Unigene11445\_All, Unigene11450\_All, Unigene11465\_All, Unigene11494\_All, Unigene11534\_All, Unigene11560\_All, Unigene11561\_All, Unigene11568\_All, Unigene11613\_All, Unigene11614\_All, Unigene11724\_All, Unigene11756\_All, Unigene11786\_All, Unigene11792\_All, Unigene11796\_All, Unigene11802\_All, Unigene11806\_All, Unigene11809\_All, Unigene11819\_All, Unigene11832\_All, Unigene11833\_All, Unigene11836\_All, Unigene11851\_All, Unigene11853\_All, Unigene11864\_All, Unigene11868\_All, Unigene11870\_All, Unigene11871\_All, Unigene11898\_All, Unigene11904\_All, Unigene11909\_All, Unigene11912\_All, Unigene11918\_All, Unigene11921\_All, Unigene11922\_All, Unigene11926\_All, Unigene11968\_All, Unigene12004\_All, Unigene12013\_All, Unigene12018\_All, Unigene12051\_All, Unigene12065\_All, Unigene12067\_All, Unigene12075\_All, Unigene12135\_All, Unigene12162\_All, Unigene12188\_All, Unigene12207\_All, Unigene12232\_All, Unigene12256\_All, Unigene12259\_All, Unigene12279\_All, Unigene12286\_All, Unigene12315\_All, Unigene12384\_All, Unigene12407\_All, Unigene12437\_All, Unigene12502\_All, Unigene12512\_All, Unigene12602\_All, Unigene12719\_All, Unigene12800\_All, Unigene12812\_All, Unigene12873\_All, Unigene12912\_All, Unigene12917\_All, Unigene12966\_All, Unigene13177\_All, Unigene13362\_All, Unigene13422\_All, Unigene13498\_All, Unigene13638\_All, Unigene13853\_All, Unigene1417\_All, Unigene14208\_All, Unigene1515\_All, Unigene15327\_All, Unigene15384\_All, Unigene1544\_All, Unigene15629\_All, Unigene15769\_All, Unigene15950\_All, Unigene16204\_All, Unigene16218\_All, Unigene16290\_All, Unigene1634\_All, Unigene16549\_All, Unigene16599\_All, Unigene16616\_All, Unigene16660\_All, Unigene16672\_All, Unigene16761\_All, Unigene16769\_All, Unigene16807\_All, Unigene17278\_All, Unigene17406\_All, Unigene17468\_All, Unigene17618\_All, Unigene17702\_All, Unigene17865\_All, Unigene18145\_All, Unigene18358\_All, Unigene1843\_All, Unigene18495\_All, Unigene18538\_All, Unigene18539\_All, Unigene18666\_All, Unigene18993\_All, Unigene19148\_All, Unigene19218\_All, Unigene19351\_All, Unigene19388\_All, Unigene19418\_All, Unigene19523\_All, Unigene19555\_All, Unigene19844\_All, Unigene20025\_All, Unigene20152\_All, Unigene2032\_All, Unigene21092\_All, Unigene21282\_All, Unigene2209\_All, Unigene236\_All, Unigene2380\_All, Unigene247\_All, Unigene2626\_All, Unigene2835\_All, Unigene314\_All, Unigene3691\_All, Unigene3945\_All, Unigene3996\_All, Unigene4013\_All, Unigene4053\_All, Unigene4070\_All, Unigene4510\_All, Unigene4581\_All, Unigene4940\_All, Unigene5065\_All, Unigene5203\_All, Unigene5257\_All, Unigene5605\_All, Unigene5675\_All, Unigene6309\_All, Unigene6369\_All, Unigene6605\_All, Unigene661\_All, Unigene6791\_All, Unigene7049\_All, Unigene7205\_All, Unigene7297\_All, Unigene7387\_All, Unigene7667\_All, Unigene7799\_All, Unigene8107\_All, Unigene812\_All, Unigene8221\_All, Unigene8347\_All, Unigene8422\_All, Unigene8621\_All, Unigene8784\_All, Unigene883\_All, Unigene9282\_All, Unigene9312\_All, Unigene9437\_All, Unigene9663\_All, Unigene9664\_All, Unigene9995\_All, Unigene9996\_All

7

[Huntington's disease](#)

CL1146.Contig2\_All, CL1146.Contig3\_All, CL1594.Contig1\_All, CL1798.Contig1\_All, CL1798.Contig2\_All, CL1810.Contig1\_All, CL1810.Contig2\_All, CL1991.Contig2\_All, CL1991.Contig3\_All, CL1991.Contig4\_All, CL1995.Contig1\_All, CL1995.Contig2\_All, CL1995.Contig3\_All, CL2019.Contig1\_All, CL2019.Contig2\_All, CL2164.Contig2\_All, CL2170.Contig2\_All, CL2170.Contig5\_All, CL2678.Contig1\_All, CL2678.Contig2\_All, CL2848.Contig4\_All, CL2882.Contig1\_All, CL2882.Contig2\_All, CL2930.Contig5\_All, CL3019.Contig2\_All, CL3019.Contig3\_All, CL3019.Contig4\_All, CL3135.Contig1\_All, CL3135.Contig2\_All, CL3135.Contig3\_All, CL3200.Contig2\_All, CL3420.Contig1\_All, CL3664.Contig1\_All, CL3664.Contig2\_All, CL3730.Contig1\_All, CL3920.Contig2\_All, CL4105.Contig2\_All, CL4304.Contig1\_All, CL4304.Contig2\_All, CL4365.Contig1\_All, CL4555.Contig1\_All, CL4663.Contig1\_All, CL475.Contig4\_All, CL4872.Contig1\_All, CL4872.Contig2\_All, CL4881.Contig2\_All, CL5012.Contig1\_All, CL5078.Contig12\_All, CL5078.Contig8\_All, CL5098.Contig2\_All, CL527.Contig2\_All, CL527.Contig3\_All, CL5299.Contig1\_All, CL5399.Contig1\_All, CL5399.Contig2\_All, CL5433.Contig2\_All, CL598.Contig1\_All, CL598.Contig2\_All, CL691.Contig1\_All, CL851.Contig3\_All, CL870.Contig4\_All, CL870.Contig8\_All, CL870.Contig9\_All, CL962.Contig3\_All, Unigene10037\_All, Unigene10073\_All, Unigene10338\_All, Unigene10570\_All, Unigene10674\_All, Unigene10675\_All, Unigene10716\_All, Unigene10817\_All, Unigene10839\_All, Unigene10846\_All, Unigene10849\_All, Unigene10856\_All, Unigene10887\_All, Unigene10913\_All, Unigene10919\_All, Unigene10948\_All, Unigene10962\_All, Unigene10968\_All, Unigene10975\_All, Unigene10988\_All, Unigene10989\_All, Unigene11009\_All, Unigene11010\_All, Unigene11028\_All, Unigene11046\_All, Unigene11047\_All, Unigene11074\_All, Unigene11103\_All, Unigene11104\_All, Unigene11107\_All, Unigene11108\_All, Unigene11109\_All, Unigene11136\_All, Unigene11148\_All, Unigene11149\_All, Unigene11158\_All, Unigene11404\_All, Unigene11412\_All, Unigene11415\_All, Unigene11422\_All, Unigene11440\_All, Unigene11445\_All, Unigene11450\_All, Unigene11465\_All, Unigene11494\_All, Unigene11534\_All, Unigene11568\_All, Unigene11613\_All, Unigene11614\_All, Unigene11724\_All, Unigene11756\_All, Unigene11786\_All, Unigene11792\_All, Unigene11796\_All, Unigene11802\_All, Unigene11806\_All, Unigene11809\_All, Unigene11819\_All, Unigene11832\_All, Unigene11833\_All, Unigene11836\_All, Unigene11851\_All, Unigene11853\_All, Unigene11860\_All, Unigene11864\_All, Unigene11868\_All, Unigene11870\_All, Unigene11871\_All, Unigene11898\_All, Unigene11904\_All, Unigene11909\_All, Unigene11912\_All, Unigene11918\_All, Unigene11921\_All, Unigene11926\_All, Unigene11935\_All, Unigene11968\_All, Unigene12004\_All, Unigene12013\_All, Unigene12017\_All, Unigene12018\_All, Unigene12051\_All, Unigene12060\_All, Unigene12065\_All, Unigene12067\_All, Unigene12075\_All, Unigene12080\_All, Unigene12096\_All, Unigene12117\_All, Unigene12135\_All, Unigene12162\_All, Unigene12175\_All, Unigene12186\_All, Unigene12188\_All, Unigene12207\_All, Unigene12232\_All, Unigene12256\_All, Unigene12279\_All, Unigene12286\_All, Unigene12331\_All, Unigene12384\_All, Unigene12437\_All, Unigene12479\_All, Unigene12488\_All, Unigene12502\_All, Unigene12512\_All, Unigene12602\_All, Unigene1278\_All, Unigene12800\_All, Unigene12812\_All, Unigene12873\_All, Unigene12912\_All, Unigene12917\_All, Unigene12966\_All, Unigene13177\_All, Unigene13225\_All, Unigene13284\_All, Unigene13422\_All, Unigene13498\_All, Unigene13638\_All, Unigene13978\_All, Unigene1417\_All, Unigene1459\_All, Unigene1515\_All, Unigene15327\_All, Unigene15384\_All, Unigene1544\_All, Unigene15629\_All, Unigene15827\_All, Unigene15855\_All, Unigene15950\_All, Unigene16204\_All, Unigene16218\_All, Unigene1634\_All, Unigene16538\_All, Unigene16599\_All, Unigene16616\_All, Unigene1663\_All, Unigene16660\_All, Unigene16672\_All, Unigene16761\_All, Unigene16807\_All, Unigene17278\_All, Unigene17406\_All, Unigene17468\_All, Unigene17478\_All, Unigene17618\_All, Unigene17674\_All, Unigene17675\_All, Unigene17702\_All, Unigene17865\_All, Unigene18145\_All, Unigene18284\_All, Unigene18358\_All, Unigene1843\_All, Unigene18538\_All, Unigene18539\_All, Unigene18950\_All, Unigene18993\_All, Unigene19116\_All, Unigene19148\_All, Unigene19218\_All, Unigene19288\_All, Unigene19351\_All, Unigene19388\_All, Unigene19418\_All, Unigene19523\_All, Unigene19555\_All, Unigene19880\_All, Unigene20025\_All, Unigene21092\_All, Unigene21282\_All, Unigene2209\_All, Unigene236\_All, Unigene2380\_All, Unigene2513\_All, Unigene2570\_All, Unigene2626\_All, Unigene2760\_All, Unigene2835\_All, Unigene294\_All, Unigene314\_All, Unigene3241\_All, Unigene3419\_All, Unigene3691\_All, Unigene4053\_All, Unigene4070\_All, Unigene4162\_All, Unigene4251\_All, Unigene4581\_All, Unigene5179\_All, Unigene5203\_All, Unigene5245\_All, Unigene54\_All, Unigene5589\_All, Unigene5605\_All, Unigene5716\_All, Unigene5745\_All, Unigene5781\_All, Unigene6242\_All, Unigene6309\_All, Unigene6369\_All, Unigene6605\_All, Unigene661\_All, Unigene7049\_All, Unigene7205\_All, Unigene7387\_All, Unigene7737\_All, Unigene7751\_All, Unigene7799\_All, Unigene8002\_All, Unigene807\_All, Unigene8422\_All, Unigene8605\_All, Unigene883\_All, Unigene9039\_All, Unigene9282\_All, Unigene9312\_All, Unigene9437\_All, Unigene9663\_All, Unigene9664\_All, Unigene9989\_All, Unigene9995\_All, Unigene9996\_All

8

[Cardiac muscle contraction](#)

CL1075.Contig3\_All, CL1087.Contig2\_All, CL1087.Contig3\_All, CL1141.Contig2\_All, CL156.Contig4\_All, CL1594.Contig1\_All, CL1687.Contig4\_All, CL1798.Contig1\_All, CL1798.Contig2\_All, CL2137.Contig1\_All, CL2137.Contig2\_All, CL2265.Contig1\_All, CL2265.Contig2\_All, CL2474.Contig2\_All, CL2904.Contig1\_All, CL2904.Contig2\_All, CL3011.Contig1\_All, CL3019.Contig2\_All, CL3019.Contig3\_All, CL3019.Contig4\_All, CL3046.Contig1\_All, CL3092.Contig1\_All, CL3092.Contig2\_All, CL3135.Contig1\_All, CL3135.Contig2\_All, CL3135.Contig3\_All, CL3260.Contig1\_All, CL3260.Contig2\_All, CL3260.Contig3\_All, CL3260.Contig4\_All, CL3260.Contig5\_All, CL3260.Contig7\_All, CL3295.Contig1\_All, CL3297.Contig1\_All, CL3297.Contig2\_All, CL3347.Contig1\_All, CL3347.Contig2\_All, CL349.Contig12\_All, CL349.Contig3\_All, CL349.Contig5\_All, CL3543.Contig2\_All, CL3543.Contig3\_All, CL3543.Contig4\_All, CL3672.Contig4\_All, CL3761.Contig1\_All, CL3776.Contig2\_All, CL41.Contig3\_All, CL41.Contig4\_All, CL41.Contig8\_All, CL4187.Contig1\_All, CL4250.Contig2\_All, CL4304.Contig1\_All, CL4304.Contig2\_All, CL4332.Contig1\_All, CL4332.Contig2\_All, CL4454.Contig3\_All, CL4596.Contig1\_All, CL4872.Contig1\_All, CL4872.Contig2\_All, CL5012.Contig1\_All, CL503.Contig2\_All, CL503.Contig3\_All, CL503.Contig4\_All, CL503.Contig5\_All, CL503.Contig6\_All, CL503.Contig8\_All, CL531.Contig1\_All, CL573.Contig1\_All, CL642.Contig1\_All, CL642.Contig2\_All, CL644.Contig1\_All, CL703.Contig2\_All, CL703.Contig3\_All, CL703.Contig5\_All, CL703.Contig6\_All, CL923.Contig1\_All, CL923.Contig2\_All, CL923.Contig3\_All, CL962.Contig3\_All, Unigene10037\_All, Unigene10040\_All, Unigene10201\_All, Unigene10202\_All, Unigene10338\_All, Unigene10471\_All, Unigene10594\_All, Unigene10674\_All, Unigene10675\_All, Unigene10856\_All, Unigene10913\_All, Unigene10988\_All, Unigene10989\_All, Unigene11107\_All, Unigene11136\_All, Unigene11148\_All, Unigene11149\_All, Unigene11158\_All, Unigene11289\_All, Unigene11298\_All, Unigene11300\_All, Unigene1131\_All, Unigene11345\_All, Unigene11404\_All, Unigene11415\_All, Unigene11445\_All, Unigene11480\_All, Unigene11482\_All, Unigene11483\_All, Unigene11494\_All, Unigene11534\_All, Unigene11568\_All, Unigene11756\_All, Unigene11792\_All, Unigene11796\_All, Unigene11802\_All, Unigene11806\_All, Unigene11819\_All, Unigene11833\_All, Unigene11853\_All, Unigene11923\_All, Unigene11935\_All, Unigene12067\_All, Unigene12279\_All, Unigene12418\_All, Unigene12476\_All, Unigene12658\_All, Unigene12697\_All, Unigene12719\_All, Unigene12812\_All, Unigene12828\_All, Unigene12873\_All, Unigene13638\_All, Unigene1515\_All, Unigene15271\_All, Unigene15384\_All, Unigene15950\_All, Unigene16218\_All, Unigene1633\_All, Unigene1634\_All, Unigene16435\_All, Unigene16510\_All, Unigene16616\_All, Unigene16716\_All, Unigene16807\_All, Unigene16874\_All, Unigene16976\_All, Unigene1705\_All, Unigene17117\_All, Unigene17278\_All, Unigene17362\_All, Unigene17398\_All, Unigene17406\_All, Unigene17468\_All, Unigene17618\_All, Unigene17697\_All, Unigene17718\_All, Unigene17773\_All, Unigene1777\_All, Unigene17824\_All, Unigene18106\_All, Unigene18145\_All, Unigene18215\_All, Unigene18358\_All, Unigene18378\_All, Unigene18538\_All, Unigene18539\_All, Unigene18645\_All, Unigene19289\_All, Unigene19351\_All, Unigene19364\_All, Unigene19388\_All, Unigene19418\_All, Unigene19453\_All, Unigene19647\_All, Unigene19745\_All, Unigene20065\_All, Unigene20299\_All, Unigene2032\_All, Unigene2052\_All, Unigene20530\_All, Unigene2053\_All, Unigene20625\_All, Unigene210\_All, Unigene237\_All, Unigene2514\_All, Unigene3010\_All, Unigene3300\_All, Unigene3328\_All, Unigene3659\_All, Unigene3691\_All, Unigene3696\_All, Unigene4161\_All, Unigene4269\_All, Unigene4323\_All, Unigene4692\_All, Unigene4920\_All, Unigene500\_All, Unigene5724\_All, Unigene5994\_All, Unigene6013\_All, Unigene6037\_All, Unigene6215\_All, Unigene6273\_All, Unigene6369\_All, Unigene6605\_All, Unigene6896\_All, Unigene6907\_All, Unigene7063\_All, Unigene7129\_All, Unigene7206\_All, Unigene7799\_All, Unigene7829\_All, Unigene7854\_All, Unigene785\_All, Unigene8009\_All, Unigene8621\_All, Unigene9039\_All, Unigene9076\_All, Unigene9163\_All, Unigene9282\_All, Unigene9663\_All, Unigene9722\_All

|    |                                                                                                                                                                                                                                                                                                                                                                                                                                                                                                                                                                                                                                                                                                                                                                                                                                                                                                                                                                                                                                                                                                                                                                                                                                                                                                                                                                                                                                                                                                                                                                                                                                                                                                                                                                                                                                                                                                                                                                                                                                                                                                                                                                                                                                                                                                                                                                                                                                                                                                                                                                                                                                                                                                                                                                                                                                                                                                                                                                                                                                                                                                                                                                                                                                                                                                                                                                                                                                                                                                                                                                                                                                                                                                                                                                                                                                                                                                                                             |
|----|---------------------------------------------------------------------------------------------------------------------------------------------------------------------------------------------------------------------------------------------------------------------------------------------------------------------------------------------------------------------------------------------------------------------------------------------------------------------------------------------------------------------------------------------------------------------------------------------------------------------------------------------------------------------------------------------------------------------------------------------------------------------------------------------------------------------------------------------------------------------------------------------------------------------------------------------------------------------------------------------------------------------------------------------------------------------------------------------------------------------------------------------------------------------------------------------------------------------------------------------------------------------------------------------------------------------------------------------------------------------------------------------------------------------------------------------------------------------------------------------------------------------------------------------------------------------------------------------------------------------------------------------------------------------------------------------------------------------------------------------------------------------------------------------------------------------------------------------------------------------------------------------------------------------------------------------------------------------------------------------------------------------------------------------------------------------------------------------------------------------------------------------------------------------------------------------------------------------------------------------------------------------------------------------------------------------------------------------------------------------------------------------------------------------------------------------------------------------------------------------------------------------------------------------------------------------------------------------------------------------------------------------------------------------------------------------------------------------------------------------------------------------------------------------------------------------------------------------------------------------------------------------------------------------------------------------------------------------------------------------------------------------------------------------------------------------------------------------------------------------------------------------------------------------------------------------------------------------------------------------------------------------------------------------------------------------------------------------------------------------------------------------------------------------------------------------------------------------------------------------------------------------------------------------------------------------------------------------------------------------------------------------------------------------------------------------------------------------------------------------------------------------------------------------------------------------------------------------------------------------------------------------------------------------------------------------|
| 9  | <a href="#">Hypertrophic cardiomyopathy (HCM)</a> <p>CL1075.Contig3_All, CL1079.Contig4_All, CL1087.Contig2_All, CL1087.Contig3_All, CL1132.Contig1_All, CL1132.Contig2_All, CL1141.Contig2_All, CL1355.Contig1_All, CL156.Contig1_All, CL156.Contig3_All, CL156.Contig4_All, CL1687.Contig4_All, CL1698.Contig2_All, CL1704.Contig1_All, CL1704.Contig2_All, CL1803.Contig1_All, CL2265.Contig1_All, CL2265.Contig2_All, CL2331.Contig2_All, CL2331.Contig3_All, CL2517.Contig4_All, CL2843.Contig2_All, CL2904.Contig1_All, CL2904.Contig2_All, CL3011.Contig1_All, CL3046.Contig1_All, CL3092.Contig1_All, CL3092.Contig2_All, CL3112.Contig3_All, CL3260.Contig1_All, CL3260.Contig2_All, CL3260.Contig3_All, CL3260.Contig4_All, CL3260.Contig5_All, CL3260.Contig7_All, CL3295.Contig1_All, CL3297.Contig1_All, CL3297.Contig2_All, CL3347.Contig1_All, CL3347.Contig2_All, CL3428.Contig1_All, CL3428.Contig2_All, CL3442.Contig1_All, CL349.Contig12_All, CL349.Contig3_All, CL349.Contig5_All, CL3543.Contig2_All, CL3543.Contig3_All, CL3543.Contig4_All, CL3554.Contig1_All, CL3590.Contig2_All, CL3672.Contig4_All, CL3761.Contig1_All, CL408.Contig1_All, CL408.Contig3_All, CL408.Contig4_All, CL4187.Contig1_All, CL4250.Contig2_All, CL4332.Contig1_All, CL4332.Contig2_All, CL4454.Contig3_All, CL4596.Contig1_All, CL470.Contig1_All, CL4992.Contig1_All, CL503.Contig2_All, CL503.Contig3_All, CL503.Contig4_All, CL503.Contig5_All, CL503.Contig6_All, CL503.Contig8_All, CL531.Contig1_All, CL5352.Contig1_All, CL5352.Contig2_All, CL5468.Contig3_All, CL573.Contig1_All, CL636.Contig1_All, CL636.Contig2_All, CL642.Contig1_All, CL642.Contig2_All, CL644.Contig1_All, CL703.Contig2_All, CL703.Contig3_All, CL703.Contig5_All, CL703.Contig6_All, CL923.Contig1_All, CL923.Contig2_All, CL923.Contig3_All, Unigene10040_All, Unigene10201_All, Unigene10202_All, Unigene10471_All, Unigene11289_All, Unigene11298_All, Unigene11300_All, Unigene1131_All, Unigene11345_All, Unigene11597_All, Unigene11598_All, Unigene11599_All, Unigene11623_All, Unigene11923_All, Unigene11935_All, Unigene12418_All, Unigene12476_All, Unigene1257_All, Unigene12627_All, Unigene12658_All, Unigene12684_All, Unigene12697_All, Unigene12719_All, Unigene12828_All, Unigene13092_All, Unigene136_All, Unigene15271_All, Unigene15824_All, Unigene1633_All, Unigene16435_All, Unigene16510_All, Unigene16716_All, Unigene16874_All, Unigene16976_All, Unigene1705_All, Unigene17116_All, Unigene17117_All, Unigene17279_All, Unigene17362_All, Unigene17398_All, Unigene17697_All, Unigene17718_All, Unigene17773_All, Unigene1777_All, Unigene17824_All, Unigene18076_All, Unigene18106_All, Unigene18173_All, Unigene18215_All, Unigene18378_All, Unigene18598_All, Unigene18645_All, Unigene19289_All, Unigene19364_All, Unigene19453_All, Unigene19647_All, Unigene19738_All, Unigene19745_All, Unigene19866_All, Unigene20065_All, Unigene2020_All, Unigene20299_All, Unigene2032_All, Unigene2052_All, Unigene20530_All, Unigene2053_All, Unigene20625_All, Unigene210_All, Unigene237_All, Unigene2503_All, Unigene2514_All, Unigene2741_All, Unigene278_All, Unigene2980_All, Unigene3061_All, Unigene3187_All, Unigene3300_All, Unigene3328_All, Unigene3407_All, Unigene3659_All, Unigene3696_All, Unigene3945_All, Unigene4052_All, Unigene4161_All, Unigene4207_All, Unigene4269_All, Unigene4406_All, Unigene4692_All, Unigene4920_All, Unigene500_All, Unigene5722_All, Unigene58_All, Unigene5994_All, Unigene6013_All, Unigene6037_All, Unigene6273_All, Unigene6284_All, Unigene6896_All, Unigene6907_All, Unigene7015_All, Unigene7063_All, Unigene7096_All, Unigene7129_All, Unigene7829_All, Unigene7854_All, Unigene785_All, Unigene8009_All, Unigene8482_All, Unigene8621_All, Unigene8830_All, Unigene8959_All, Unigene9039_All, Unigene9062_All, Unigene9076_All, Unigene9200_All, Unigene9722_All</p> |
| 10 | <a href="#">Viral myocarditis</a> <p>CL1046.Contig1_All, CL1046.Contig2_All, CL1046.Contig3_All, CL1075.Contig3_All, CL1079.Contig4_All, CL1141.Contig2_All, CL1355.Contig1_All, CL1535.Contig3_All, CL156.Contig1_All, CL156.Contig3_All, CL156.Contig4_All, CL1687.Contig4_All, CL1803.Contig1_All, CL2265.Contig1_All, CL2265.Contig2_All, CL2517.Contig4_All, CL257.Contig1_All, CL257.Contig2_All, CL2882.Contig1_All, CL2882.Contig2_All, CL2904.Contig1_All, CL2904.Contig2_All, CL3011.Contig1_All, CL3046.Contig1_All, CL3092.Contig1_All, CL3092.Contig2_All, CL3260.Contig1_All, CL3260.Contig2_All, CL3260.Contig3_All, CL3260.Contig4_All, CL3260.Contig5_All, CL3260.Contig7_All, CL3295.Contig1_All, CL3297.Contig1_All, CL3297.Contig2_All, CL3347.Contig1_All, CL3347.Contig2_All, CL3442.Contig1_All, CL3543.Contig2_All, CL3543.Contig3_All, CL3543.Contig4_All, CL3554.Contig1_All, CL3672.Contig4_All, CL3761.Contig1_All, CL4187.Contig1_All, CL4250.Contig2_All, CL4454.Contig3_All, CL4596.Contig1_All, CL470.Contig1_All, CL4992.Contig1_All, CL503.Contig2_All, CL503.Contig3_All, CL503.Contig4_All, CL503.Contig5_All, CL503.Contig6_All, CL503.Contig8_All, CL5352.Contig1_All, CL5352.Contig2_All, CL5468.Contig3_All, CL573.Contig1_All, CL644.Contig1_All, CL923.Contig1_All, CL923.Contig2_All, CL923.Contig3_All, Unigene10201_All, Unigene10202_All, Unigene11289_All, Unigene11298_All, Unigene11300_All, Unigene1131_All, Unigene11597_All, Unigene11598_All, Unigene11599_All, Unigene11724_All, Unigene11869_All, Unigene11935_All, Unigene12188_All, Unigene12418_All, Unigene12658_All, Unigene12684_All, Unigene12697_All, Unigene12828_All, Unigene13092_All, Unigene136_All, Unigene15271_All, Unigene15824_All, Unigene1633_All, Unigene16435_All, Unigene16510_All, Unigene16716_All, Unigene16874_All, Unigene16976_All, Unigene1705_All, Unigene17117_All, Unigene17362_All, Unigene17702_All, Unigene1777_All, Unigene17824_All, Unigene18106_All, Unigene18215_All, Unigene18378_All, Unigene18598_All, Unigene18645_All, Unigene19289_All, Unigene19364_All, Unigene19453_All, Unigene19647_All, Unigene19745_All, Unigene198_All, Unigene20065_All, Unigene20260_All, Unigene20299_All, Unigene2052_All, Unigene20530_All, Unigene2053_All, Unigene210_All, Unigene237_All, Unigene2503_All, Unigene2514_All, Unigene2741_All, Unigene278_All, Unigene3187_All, Unigene3328_All, Unigene3659_All, Unigene3696_All, Unigene4161_All, Unigene4269_All, Unigene4581_All, Unigene4692_All, Unigene4920_All, Unigene500_All, Unigene5092_All, Unigene5994_All, Unigene6013_All, Unigene6014_All, Unigene6037_All, Unigene6273_All, Unigene6896_All, Unigene6907_All, Unigene7063_All, Unigene7096_All, Unigene7129_All, Unigene7829_All, Unigene7854_All, Unigene785_All, Unigene7983_All, Unigene8009_All, Unigene8933_All, Unigene9039_All, Unigene9062_All, Unigene9076_All, Unigene9722_All</p>                                                                                                                                                                                                                                                                                                                                                                                                                                                                                                                                                                                                                                                                                                                                                                                                                                                                                                                                                                                          |



|    |                                          |                                                                                                                                                                                                                                                                                                                                                                                                                                                                                                                                                                                                                                                                                                                                                                                                                                                                                                                                                                                                                                                                                                                                                                                                                                                                                                                                                                                                                                                                                                                                                                                                                                                                                                                                                                                                                                                                                                                                                                                                                                                                                                                                                                                                                                                                                                                                                                                                                                                                                                                                                                                                                                                                                                                                                                                                                                                                                                                                                                                                                                                                                                                                                                                                                                                                                                                                                                                                                                                                                                                                                                                                                                                                                                                                                                                                                                                                                                                                                                                                                                                                                                                                                                                                                                                                                                                                                                                                                                                                                                                                                                                                                                                                                                                                                                                                                                                     |
|----|------------------------------------------|-----------------------------------------------------------------------------------------------------------------------------------------------------------------------------------------------------------------------------------------------------------------------------------------------------------------------------------------------------------------------------------------------------------------------------------------------------------------------------------------------------------------------------------------------------------------------------------------------------------------------------------------------------------------------------------------------------------------------------------------------------------------------------------------------------------------------------------------------------------------------------------------------------------------------------------------------------------------------------------------------------------------------------------------------------------------------------------------------------------------------------------------------------------------------------------------------------------------------------------------------------------------------------------------------------------------------------------------------------------------------------------------------------------------------------------------------------------------------------------------------------------------------------------------------------------------------------------------------------------------------------------------------------------------------------------------------------------------------------------------------------------------------------------------------------------------------------------------------------------------------------------------------------------------------------------------------------------------------------------------------------------------------------------------------------------------------------------------------------------------------------------------------------------------------------------------------------------------------------------------------------------------------------------------------------------------------------------------------------------------------------------------------------------------------------------------------------------------------------------------------------------------------------------------------------------------------------------------------------------------------------------------------------------------------------------------------------------------------------------------------------------------------------------------------------------------------------------------------------------------------------------------------------------------------------------------------------------------------------------------------------------------------------------------------------------------------------------------------------------------------------------------------------------------------------------------------------------------------------------------------------------------------------------------------------------------------------------------------------------------------------------------------------------------------------------------------------------------------------------------------------------------------------------------------------------------------------------------------------------------------------------------------------------------------------------------------------------------------------------------------------------------------------------------------------------------------------------------------------------------------------------------------------------------------------------------------------------------------------------------------------------------------------------------------------------------------------------------------------------------------------------------------------------------------------------------------------------------------------------------------------------------------------------------------------------------------------------------------------------------------------------------------------------------------------------------------------------------------------------------------------------------------------------------------------------------------------------------------------------------------------------------------------------------------------------------------------------------------------------------------------------------------------------------------------------------------------------------------------|
| 11 | <a href="#">ECM-receptor interaction</a> | CL1011.Contig1_All, CL1011.Contig4_All, CL1055.Contig1_All, CL1055.Contig3_All, CL1055.Contig4_All, CL1055.Contig5_All, CL1055.Contig6_All, CL1055.Contig7_All, CL1062.Contig2_All, CL1079.Contig4_All, CL1092.Contig1_All, CL1147.Contig1_All, CL1147.Contig2_All, CL1202.Contig1_All, CL1202.Contig2_All, CL1370.Contig4_All, CL1436.Contig2_All, CL1473.Contig1_All, CL1495.Contig1_All, CL1495.Contig2_All, CL1566.Contig1_All, CL1566.Contig2_All, CL1718.Contig1_All, CL1718.Contig2_All, CL1890.Contig4_All, CL2009.Contig2_All, CL209.Contig1_All, CL209.Contig2_All, CL209.Contig3_All, CL209.Contig4_All, CL2099.Contig1_All, CL2252.Contig1_All, CL2252.Contig2_All, CL2252.Contig3_All, CL2265.Contig1_All, CL2265.Contig2_All, CL2297.Contig2_All, CL2331.Contig2_All, CL2331.Contig3_All, CL2517.Contig4_All, CL2611.Contig1_All, CL2611.Contig2_All, CL2927.Contig1_All, CL2927.Contig3_All, CL2952.Contig1_All, CL3327.Contig1_All, CL3327.Contig2_All, CL3371.Contig1_All, CL3387.Contig1_All, CL3387.Contig2_All, CL3442.Contig1_All, CL3797.Contig1_All, CL3797.Contig2_All, CL3879.Contig2_All, CL4026.Contig1_All, CL4042.Contig1_All, CL4042.Contig2_All, CL4042.Contig3_All, CL4087.Contig1_All, CL4401.Contig2_All, CL4401.Contig3_All, CL4401.Contig4_All, CL4511.Contig1_All, CL4654.Contig2_All, CL4690.Contig1_All, CL4690.Contig2_All, CL470.Contig1_All, CL4844.Contig1_All, CL4844.Contig2_All, CL498.Contig2_All, CL498.Contig4_All, CL4992.Contig1_All, CL5048.Contig1_All, CL5221.Contig1_All, CL5222.Contig2_All, CL5268.Contig2_All, CL5268.Contig3_All, CL5373.Contig1_All, CL5373.Contig2_All, CL5394.Contig2_All, CL5464.Contig1_All, CL5464.Contig2_All, CL5464.Contig3_All, CL577.Contig1_All, CL577.Contig2_All, CL80.Contig1_All, CL986.Contig2_All, Unigene10012_All, Unigene10093_All, Unigene10095_All, Unigene10096_All, Unigene10123_All, Unigene10200_All, Unigene10238_All, Unigene10254_All, Unigene10316_All, Unigene1040_All, Unigene10623_All, Unigene10723_All, Unigene10724_All, Unigene10779_All, Unigene10787_All, Unigene1096_All, Unigene10974_All, Unigene10983_All, Unigene10984_All, Unigene10991_All, Unigene11034_All, Unigene11097_All, Unigene11141_All, Unigene11160_All, Unigene11190_All, Unigene11203_All, Unigene11337_All, Unigene11338_All, Unigene11358_All, Unigene11377_All, Unigene11436_All, Unigene11447_All, Unigene11448_All, Unigene11469_All, Unigene11510_All, Unigene11511_All, Unigene11515_All, Unigene11538_All, Unigene11543_All, Unigene11544_All, Unigene11565_All, Unigene11576_All, Unigene11587_All, Unigene11588_All, Unigene11589_All, Unigene11590_All, Unigene11629_All, Unigene11648_All, Unigene11662_All, Unigene11672_All, Unigene11687_All, Unigene11797_All, Unigene11985_All, Unigene12118_All, Unigene12125_All, Unigene12154_All, Unigene12155_All, Unigene12185_All, Unigene12194_All, Unigene12210_All, Unigene12212_All, Unigene12435_All, Unigene12533_All, Unigene12537_All, Unigene12692_All, Unigene12710_All, Unigene12974_All, Unigene14133_All, Unigene15320_All, Unigene15321_All, Unigene15367_All, Unigene15513_All, Unigene15658_All, Unigene15824_All, Unigene15840_All, Unigene1614_All, Unigene16906_All, Unigene16965_All, Unigene16966_All, Unigene17324_All, Unigene17679_All, Unigene17728_All, Unigene17851_All, Unigene1792_All, Unigene1799_All, Unigene18488_All, Unigene18496_All, Unigene19237_All, Unigene19426_All, Unigene19840_All, Unigene20073_All, Unigene20_All, Unigene2105_All, Unigene2180_All, Unigene2190_All, Unigene2251_All, Unigene2297_All, Unigene2503_All, Unigene2560_All, Unigene28_All, Unigene3000_All, Unigene3063_All, Unigene3066_All, Unigene3123_All, Unigene3193_All, Unigene3261_All, Unigene3316_All, Unigene3323_All, Unigene3324_All, Unigene3346_All, Unigene3403_All, Unigene352_All, Unigene3669_All, Unigene3889_All, Unigene3902_All, Unigene3945_All, Unigene3947_All, Unigene3964_All, Unigene4004_All, Unigene4074_All, Unigene414_All, Unigene4207_All, Unigene4218_All, Unigene4418_All, Unigene4757_All, Unigene4825_All, Unigene4922_All, Unigene5059_All, Unigene5096_All, Unigene5108_All, Unigene5121_All, Unigene5169_All, Unigene5799_All, Unigene579_All, Unigene5889_All, Unigene6076_All, Unigene6780_All, Unigene6886_All, Unigene690_All, Unigene7029_All, Unigene7054_All, Unigene7094_All, Unigene7100_All, Unigene7106_All, Unigene7280_All, Unigene7353_All, Unigene7431_All, Unigene7440_All, Unigene7534_All, Unigene7560_All, Unigene7836_All, Unigene8102_All, Unigene8179_All, Unigene8204_All, Unigene8231_All, Unigene8262_All, Unigene8324_All, Unigene8399_All, Unigene8514_All, Unigene8537_All, Unigene8562_All, Unigene8915_All, Unigene8936_All, Unigene9258_All, Unigene9284_All, Unigene936_All, Unigene9611_All, Unigene9988_All |
|----|------------------------------------------|-----------------------------------------------------------------------------------------------------------------------------------------------------------------------------------------------------------------------------------------------------------------------------------------------------------------------------------------------------------------------------------------------------------------------------------------------------------------------------------------------------------------------------------------------------------------------------------------------------------------------------------------------------------------------------------------------------------------------------------------------------------------------------------------------------------------------------------------------------------------------------------------------------------------------------------------------------------------------------------------------------------------------------------------------------------------------------------------------------------------------------------------------------------------------------------------------------------------------------------------------------------------------------------------------------------------------------------------------------------------------------------------------------------------------------------------------------------------------------------------------------------------------------------------------------------------------------------------------------------------------------------------------------------------------------------------------------------------------------------------------------------------------------------------------------------------------------------------------------------------------------------------------------------------------------------------------------------------------------------------------------------------------------------------------------------------------------------------------------------------------------------------------------------------------------------------------------------------------------------------------------------------------------------------------------------------------------------------------------------------------------------------------------------------------------------------------------------------------------------------------------------------------------------------------------------------------------------------------------------------------------------------------------------------------------------------------------------------------------------------------------------------------------------------------------------------------------------------------------------------------------------------------------------------------------------------------------------------------------------------------------------------------------------------------------------------------------------------------------------------------------------------------------------------------------------------------------------------------------------------------------------------------------------------------------------------------------------------------------------------------------------------------------------------------------------------------------------------------------------------------------------------------------------------------------------------------------------------------------------------------------------------------------------------------------------------------------------------------------------------------------------------------------------------------------------------------------------------------------------------------------------------------------------------------------------------------------------------------------------------------------------------------------------------------------------------------------------------------------------------------------------------------------------------------------------------------------------------------------------------------------------------------------------------------------------------------------------------------------------------------------------------------------------------------------------------------------------------------------------------------------------------------------------------------------------------------------------------------------------------------------------------------------------------------------------------------------------------------------------------------------------------------------------------------------------------------------------------------------|

CL1075.Contig3\_All, CL1141.Contig2\_All, CL128.Contig10\_All, CL1355.Contig1\_All, CL1503.Contig3\_All, CL1503.Contig4\_All, CL1503.Contig5\_All, CL156.Contig1\_All, CL156.Contig3\_All, CL156.Contig4\_All, CL1687.Contig4\_All, CL1803.Contig1\_All, CL1929.Contig5\_All, CL1929.Contig6\_All, CL2034.Contig1\_All, CL2034.Contig2\_All, CL2085.Contig1\_All, CL2182.Contig1\_All, CL2182.Contig3\_All, CL2182.Contig4\_All, CL2265.Contig1\_All, CL2265.Contig2\_All, CL2552.Contig3\_All, CL2614.Contig10\_All, CL2614.Contig11\_All, CL2614.Contig12\_All, CL2614.Contig4\_All, CL271.Contig2\_All, CL2791.Contig2\_All, CL2873.Contig1\_All, CL2873.Contig2\_All, CL2904.Contig1\_All, CL2904.Contig2\_All, CL2909.Contig1\_All, CL2909.Contig3\_All, CL2909.Contig4\_All, CL3011.Contig1\_All, CL3046.Contig1\_All, CL3047.Contig1\_All, CL3047.Contig2\_All, CL3092.Contig1\_All, CL3092.Contig2\_All, CL3231.Contig1\_All, CL3231.Contig2\_All, CL3260.Contig1\_All, CL3260.Contig2\_All, CL3260.Contig3\_All, CL3260.Contig4\_All, CL3260.Contig5\_All, CL3260.Contig7\_All, CL3295.Contig1\_All, CL3297.Contig1\_All, CL3297.Contig2\_All, CL3297.Contig3\_All, CL3347.Contig1\_All, CL3347.Contig2\_All, CL3348.Contig1\_All, CL3436.Contig1\_All, CL3436.Contig4\_All, CL3436.Contig9\_All, CL3460.Contig2\_All, CL3460.Contig3\_All, CL3498.Contig1\_All, CL3498.Contig2\_All, CL3543.Contig2\_All, CL3543.Contig3\_All, CL3543.Contig4\_All, CL358.Contig1\_All, CL362.Contig2\_All, CL362.Contig3\_All, CL362.Contig4\_All, CL3672.Contig4\_All, CL3761.Contig1\_All, CL3819.Contig1\_All, CL3819.Contig2\_All, CL39.Contig1\_All, CL39.Contig2\_All, CL39.Contig3\_All, CL39.Contig4\_All, CL3939.Contig1\_All, CL3939.Contig2\_All, CL402.Contig1\_All, CL4040.Contig1\_All, CL4187.Contig1\_All, CL4250.Contig2\_All, CL4420.Contig1\_All, CL4420.Contig2\_All, CL4439.Contig2\_All, CL4454.Contig3\_All, CL4479.Contig2\_All, CL4479.Contig3\_All, CL4479.Contig5\_All, CL4591.Contig2\_All, CL4596.Contig1\_All, CL4855.Contig1\_All, CL4855.Contig2\_All, CL4896.Contig1\_All, CL503.Contig2\_All, CL503.Contig3\_All, CL503.Contig4\_All, CL503.Contig5\_All, CL503.Contig6\_All, CL503.Contig8\_All, CL5159.Contig1\_All, CL5159.Contig2\_All, CL523.Contig1\_All, CL523.Contig2\_All, CL5299.Contig1\_All, CL5330.Contig1\_All, CL5330.Contig2\_All, CL538.Contig1\_All, CL5391.Contig1\_All, CL5391.Contig2\_All, CL540.Contig2\_All, CL5468.Contig3\_All, CL573.Contig1\_All, CL593.Contig1\_All, CL622.Contig1\_All, CL622.Contig2\_All, CL622.Contig4\_All, CL626.Contig3\_All, CL644.Contig1\_All, CL697.Contig1\_All, CL697.Contig2\_All, CL709.Contig2\_All, CL709.Contig3\_All, CL724.Contig1\_All, CL761.Contig1\_All, CL761.Contig2\_All, CL866.Contig3\_All, CL923.Contig1\_All, CL923.Contig2\_All, CL923.Contig3\_All, CL940.Contig3\_All, CL940.Contig5\_All, Unigene10201\_All, Unigene10202\_All, Unigene10242\_All, Unigene10619\_All, Unigene10863\_All, Unigene11289\_All, Unigene11298\_All, Unigene11300\_All, Unigene11307\_All, Unigene1131\_All, Unigene11597\_All, Unigene11598\_All, Unigene11599\_All, Unigene11607\_All, Unigene11823\_All, Unigene11874\_All, Unigene11935\_All, Unigene12057\_All, Unigene12099\_All, Unigene12314\_All, Unigene12418\_All, Unigene12591\_All, Unigene12658\_All, Unigene12671\_All, Unigene12684\_All, Unigene12697\_All, Unigene12828\_All, Unigene13092\_All, Unigene13134\_All, Unigene13432\_All, Unigene15271\_All, Unigene15806\_All, Unigene1633\_All, Unigene16435\_All, Unigene16510\_All, Unigene16716\_All, Unigene16874\_All, Unigene16976\_All, Unigene1705\_All, Unigene17117\_All, Unigene17206\_All, Unigene17362\_All, Unigene17628\_All, Unigene1777\_All, Unigene17824\_All, Unigene18106\_All, Unigene18215\_All, Unigene18317\_All, Unigene18378\_All, Unigene18423\_All, Unigene18598\_All, Unigene18645\_All, Unigene18873\_All, Unigene18898\_All, Unigene18903\_All, Unigene18923\_All, Unigene19289\_All, Unigene19347\_All, Unigene19364\_All, Unigene19453\_All, Unigene19647\_All, Unigene19708\_All, Unigene19745\_All, Unigene20065\_All, Unigene20299\_All, Unigene2052\_All, Unigene20530\_All, Unigene20535\_All, Unigene2053\_All, Unigene20625\_All, Unigene210\_All, Unigene21582\_All, Unigene2166\_All, Unigene2374\_All, Unigene237\_All, Unigene2514\_All, Unigene256\_All, Unigene2671\_All, Unigene2741\_All, Unigene2749\_All, Unigene278\_All, Unigene3300\_All, Unigene3328\_All, Unigene3659\_All, Unigene3696\_All, Unigene3751\_All, Unigene4056\_All, Unigene4133\_All, Unigene4161\_All, Unigene4269\_All, Unigene4500\_All, Unigene4692\_All, Unigene4920\_All, Unigene500\_All, Unigene5075\_All, Unigene5378\_All, Unigene5521\_All, Unigene5727\_All, Unigene5808\_All, Unigene5994\_All, Unigene6010\_All, Unigene6013\_All, Unigene6037\_All, Unigene6217\_All, Unigene6273\_All, Unigene63\_All, Unigene6896\_All, Unigene6907\_All, Unigene7063\_All, Unigene7129\_All, Unigene7158\_All, Unigene7829\_All, Unigene783\_All, Unigene7854\_All, Unigene785\_All, Unigene8009\_All, Unigene8056\_All, Unigene8061\_All, Unigene8146\_All, Unigene8247\_All, Unigene9039\_All, Unigene9042\_All, Unigene9050\_All, Unigene9076\_All, Unigene9249\_All, Unigene9722\_All, Unigene9730\_All, Unigene9877\_All

|    |                                           |                                                                                                                                                                                                                                                                                                                                                                                                                                                                                                                                                                                                                                                                                                                                                                                                                                                                                                                                                                                                                                                                                                                                                                                                                                                                                                                                                                                                                                                                                                                                                                                                                                                                                                                                                                                                                                                                                                                                                                                                                                                                                                                                                                                                                                                                                                                                                                                                                                                                                                                                                                                                                                                                                                                                                                                                                                                                                                                                                                                                                                                                                                                                                                                                                                                                                                                                                                                                                                                                                                                                                                                                                                                                                                                                                                                                                                                                                                                                                                                                                                                                                                                                                                                                                                                                                                                                                                                                                                                                                                                                                                                            |
|----|-------------------------------------------|--------------------------------------------------------------------------------------------------------------------------------------------------------------------------------------------------------------------------------------------------------------------------------------------------------------------------------------------------------------------------------------------------------------------------------------------------------------------------------------------------------------------------------------------------------------------------------------------------------------------------------------------------------------------------------------------------------------------------------------------------------------------------------------------------------------------------------------------------------------------------------------------------------------------------------------------------------------------------------------------------------------------------------------------------------------------------------------------------------------------------------------------------------------------------------------------------------------------------------------------------------------------------------------------------------------------------------------------------------------------------------------------------------------------------------------------------------------------------------------------------------------------------------------------------------------------------------------------------------------------------------------------------------------------------------------------------------------------------------------------------------------------------------------------------------------------------------------------------------------------------------------------------------------------------------------------------------------------------------------------------------------------------------------------------------------------------------------------------------------------------------------------------------------------------------------------------------------------------------------------------------------------------------------------------------------------------------------------------------------------------------------------------------------------------------------------------------------------------------------------------------------------------------------------------------------------------------------------------------------------------------------------------------------------------------------------------------------------------------------------------------------------------------------------------------------------------------------------------------------------------------------------------------------------------------------------------------------------------------------------------------------------------------------------------------------------------------------------------------------------------------------------------------------------------------------------------------------------------------------------------------------------------------------------------------------------------------------------------------------------------------------------------------------------------------------------------------------------------------------------------------------------------------------------------------------------------------------------------------------------------------------------------------------------------------------------------------------------------------------------------------------------------------------------------------------------------------------------------------------------------------------------------------------------------------------------------------------------------------------------------------------------------------------------------------------------------------------------------------------------------------------------------------------------------------------------------------------------------------------------------------------------------------------------------------------------------------------------------------------------------------------------------------------------------------------------------------------------------------------------------------------------------------------------------------------------------------------------|
| 13 | <a href="#">Oxidative phosphorylation</a> | CL1146.Contig2_All, CL1146.Contig3_All, CL1447.Contig2_All, CL1594.Contig1_All, CL1798.Contig1_All, CL1798.Contig2_All, CL1995.Contig1_All, CL1995.Contig2_All, CL1995.Contig3_All, CL2128.Contig1_All, CL2150.Contig3_All, CL2164.Contig2_All, CL2634.Contig1_All, CL2634.Contig2_All, CL2678.Contig1_All, CL2678.Contig2_All, CL3019.Contig2_All, CL3019.Contig3_All, CL3019.Contig4_All, CL3091.Contig1_All, CL3091.Contig2_All, CL3091.Contig3_All, CL3091.Contig4_All, CL3135.Contig1_All, CL3135.Contig2_All, CL3135.Contig3_All, CL3730.Contig1_All, CL3884.Contig2_All, CL4090.Contig2_All, CL41.Contig4_All, CL41.Contig8_All, CL4304.Contig1_All, CL4304.Contig2_All, CL4365.Contig1_All, CL4459.Contig1_All, CL4460.Contig1_All, CL4482.Contig2_All, CL4663.Contig1_All, CL4872.Contig1_All, CL4872.Contig2_All, CL4881.Contig2_All, CL5012.Contig1_All, CL5078.Contig12_All, CL5078.Contig8_All, CL527.Contig2_All, CL527.Contig3_All, CL962.Contig3_All, Unigene10026_All, Unigene10037_All, Unigene10073_All, Unigene10338_All, Unigene10483_All, Unigene10570_All, Unigene10674_All, Unigene10675_All, Unigene10716_All, Unigene10829_All, Unigene10839_All, Unigene10846_All, Unigene10849_All, Unigene10856_All, Unigene10898_All, Unigene10899_All, Unigene10913_All, Unigene10919_All, Unigene10962_All, Unigene10968_All, Unigene10975_All, Unigene10988_All, Unigene10989_All, Unigene11009_All, Unigene11010_All, Unigene11028_All, Unigene11046_All, Unigene11047_All, Unigene11074_All, Unigene11103_All, Unigene11104_All, Unigene11105_All, Unigene11106_All, Unigene11107_All, Unigene11108_All, Unigene11109_All, Unigene11114_All, Unigene11136_All, Unigene11148_All, Unigene11149_All, Unigene11158_All, Unigene11240_All, Unigene11386_All, Unigene11404_All, Unigene11415_All, Unigene11419_All, Unigene11420_All, Unigene11440_All, Unigene11445_All, Unigene11450_All, Unigene11465_All, Unigene11494_All, Unigene11534_All, Unigene11568_All, Unigene11613_All, Unigene11614_All, Unigene11756_All, Unigene11767_All, Unigene11768_All, Unigene11778_All, Unigene11786_All, Unigene11792_All, Unigene11796_All, Unigene11802_All, Unigene11806_All, Unigene11809_All, Unigene11817_All, Unigene11819_All, Unigene11832_All, Unigene11833_All, Unigene11836_All, Unigene11851_All, Unigene11853_All, Unigene11864_All, Unigene11868_All, Unigene11870_All, Unigene11871_All, Unigene11898_All, Unigene11899_All, Unigene1189_All, Unigene11904_All, Unigene11909_All, Unigene11912_All, Unigene11918_All, Unigene11921_All, Unigene11926_All, Unigene11948_All, Unigene11966_All, Unigene11968_All, Unigene12004_All, Unigene12013_All, Unigene12018_All, Unigene12028_All, Unigene12051_All, Unigene12062_All, Unigene12065_All, Unigene12067_All, Unigene12075_All, Unigene12135_All, Unigene12162_All, Unigene12168_All, Unigene12207_All, Unigene12209_All, Unigene12232_All, Unigene12256_All, Unigene12279_All, Unigene12286_All, Unigene12302_All, Unigene12329_All, Unigene12384_All, Unigene12423_All, Unigene12437_All, Unigene12502_All, Unigene12512_All, Unigene12602_All, Unigene12744_All, Unigene12757_All, Unigene12800_All, Unigene12812_All, Unigene12873_All, Unigene12912_All, Unigene12917_All, Unigene12923_All, Unigene12966_All, Unigene13177_All, Unigene13422_All, Unigene13498_All, Unigene13508_All, Unigene13589_All, Unigene13638_All, Unigene1515_All, Unigene15327_All, Unigene15384_All, Unigene1544_All, Unigene15629_All, Unigene15950_All, Unigene15969_All, Unigene16021_All, Unigene16204_All, Unigene16218_All, Unigene1634_All, Unigene16599_All, Unigene16616_All, Unigene16660_All, Unigene16672_All, Unigene16761_All, Unigene16807_All, Unigene17278_All, Unigene17406_All, Unigene1741_All, Unigene17468_All, Unigene17602_All, Unigene17618_All, Unigene17865_All, Unigene18145_All, Unigene18358_All, Unigene1843_All, Unigene18538_All, Unigene18539_All, Unigene18707_All, Unigene19218_All, Unigene19351_All, Unigene19388_All, Unigene19418_All, Unigene19517_All, Unigene19523_All, Unigene19555_All, Unigene19602_All, Unigene20025_All, Unigene20295_All, Unigene20614_All, Unigene21092_All, Unigene21282_All, Unigene2380_All, Unigene2626_All, Unigene2835_All, Unigene314_All, Unigene3351_All, Unigene3691_All, Unigene3730_All, Unigene5203_All, Unigene5605_All, Unigene6309_All, Unigene6369_All, Unigene6605_All, Unigene671_All, Unigene7387_All, Unigene7799_All, Unigene883_All, Unigene925_All, Unigene9282_All, Unigene9312_All, Unigene9663_All, Unigene9995_All, Unigene9996_All |
|----|-------------------------------------------|--------------------------------------------------------------------------------------------------------------------------------------------------------------------------------------------------------------------------------------------------------------------------------------------------------------------------------------------------------------------------------------------------------------------------------------------------------------------------------------------------------------------------------------------------------------------------------------------------------------------------------------------------------------------------------------------------------------------------------------------------------------------------------------------------------------------------------------------------------------------------------------------------------------------------------------------------------------------------------------------------------------------------------------------------------------------------------------------------------------------------------------------------------------------------------------------------------------------------------------------------------------------------------------------------------------------------------------------------------------------------------------------------------------------------------------------------------------------------------------------------------------------------------------------------------------------------------------------------------------------------------------------------------------------------------------------------------------------------------------------------------------------------------------------------------------------------------------------------------------------------------------------------------------------------------------------------------------------------------------------------------------------------------------------------------------------------------------------------------------------------------------------------------------------------------------------------------------------------------------------------------------------------------------------------------------------------------------------------------------------------------------------------------------------------------------------------------------------------------------------------------------------------------------------------------------------------------------------------------------------------------------------------------------------------------------------------------------------------------------------------------------------------------------------------------------------------------------------------------------------------------------------------------------------------------------------------------------------------------------------------------------------------------------------------------------------------------------------------------------------------------------------------------------------------------------------------------------------------------------------------------------------------------------------------------------------------------------------------------------------------------------------------------------------------------------------------------------------------------------------------------------------------------------------------------------------------------------------------------------------------------------------------------------------------------------------------------------------------------------------------------------------------------------------------------------------------------------------------------------------------------------------------------------------------------------------------------------------------------------------------------------------------------------------------------------------------------------------------------------------------------------------------------------------------------------------------------------------------------------------------------------------------------------------------------------------------------------------------------------------------------------------------------------------------------------------------------------------------------------------------------------------------------------------------------------------------------------------|

|    |                                      |                                                                                                                                                                                                                                                                                                                                                                                                                                                                                                                                                                                                                                                                                                                                                                                                                                                                                                                                                                                                                                                                                                                                                                                                                                                                                                                                                                                                                                                                                                                                                                                                                                                                                                                                                                                                                                                                                                                                                                                                                                                                                                                                                                                                                                                                                                                                                                                                                                                                                                                                                                                                                                                                                                                                                                                                                                                                                                                                                                                                                                                                                                                                                                                                                                                                                                                                                                                                                                                                                                                                                                                                                                                                                                                                                                                                                                                                                                                        |
|----|--------------------------------------|------------------------------------------------------------------------------------------------------------------------------------------------------------------------------------------------------------------------------------------------------------------------------------------------------------------------------------------------------------------------------------------------------------------------------------------------------------------------------------------------------------------------------------------------------------------------------------------------------------------------------------------------------------------------------------------------------------------------------------------------------------------------------------------------------------------------------------------------------------------------------------------------------------------------------------------------------------------------------------------------------------------------------------------------------------------------------------------------------------------------------------------------------------------------------------------------------------------------------------------------------------------------------------------------------------------------------------------------------------------------------------------------------------------------------------------------------------------------------------------------------------------------------------------------------------------------------------------------------------------------------------------------------------------------------------------------------------------------------------------------------------------------------------------------------------------------------------------------------------------------------------------------------------------------------------------------------------------------------------------------------------------------------------------------------------------------------------------------------------------------------------------------------------------------------------------------------------------------------------------------------------------------------------------------------------------------------------------------------------------------------------------------------------------------------------------------------------------------------------------------------------------------------------------------------------------------------------------------------------------------------------------------------------------------------------------------------------------------------------------------------------------------------------------------------------------------------------------------------------------------------------------------------------------------------------------------------------------------------------------------------------------------------------------------------------------------------------------------------------------------------------------------------------------------------------------------------------------------------------------------------------------------------------------------------------------------------------------------------------------------------------------------------------------------------------------------------------------------------------------------------------------------------------------------------------------------------------------------------------------------------------------------------------------------------------------------------------------------------------------------------------------------------------------------------------------------------------------------------------------------------------------------------------------------|
| 14 | <a href="#">Salmonella infection</a> | <p>CL1075.Contig3_All, CL1120.Contig2_All, CL1141.Contig2_All, CL1355.Contig1_All, CL1535.Contig3_All, CL156.Contig1_All, CL156.Contig3_All, CL156.Contig4_All, CL1687.Contig4_All, CL1723.Contig1_All, CL1723.Contig2_All, CL1723.Contig7_All, CL1803.Contig1_All, CL2049.Contig3_All, CL2224.Contig2_All, CL2224.Contig3_All, CL2224.Contig4_All, CL2265.Contig1_All, CL2265.Contig2_All, CL2375.Contig2_All, CL2437.Contig1_All, CL2437.Contig2_All, CL271.Contig2_All, CL2764.Contig2_All, CL284.Contig2_All, CL284.Contig3_All, CL284.Contig4_All, CL284.Contig5_All, CL2904.Contig1_All, CL2904.Contig2_All, CL2975.Contig2_All, CL3011.Contig1_All, CL3027.Contig3_All, CL3046.Contig1_All, CL3092.Contig1_All, CL3092.Contig2_All, CL3114.Contig2_All, CL3260.Contig1_All, CL3260.Contig2_All, CL3260.Contig3_All, CL3260.Contig4_All, CL3260.Contig5_All, CL3260.Contig7_All, CL3282.Contig1_All, CL3282.Contig2_All, CL3282.Contig3_All, CL3295.Contig1_All, CL3297.Contig1_All, CL3297.Contig2_All, CL3315.Contig3_All, CL3315.Contig4_All, CL3347.Contig1_All, CL3347.Contig2_All, CL3510.Contig3_All, CL3543.Contig2_All, CL3543.Contig3_All, CL3543.Contig4_All, CL3622.Contig2_All, CL3672.Contig4_All, CL3761.Contig1_All, CL3823.Contig1_All, CL3823.Contig2_All, CL4088.Contig2_All, CL4130.Contig1_All, CL4187.Contig1_All, CL4250.Contig2_All, CL4320.Contig3_All, CL4454.Contig3_All, CL4596.Contig1_All, CL4661.Contig1_All, CL4661.Contig2_All, CL4736.Contig1_All, CL4736.Contig2_All, CL4966.Contig1_All, CL503.Contig2_All, CL503.Contig3_All, CL503.Contig4_All, CL503.Contig5_All, CL503.Contig6_All, CL503.Contig8_All, CL5115.Contig1_All, CL5468.Contig3_All, CL573.Contig1_All, CL644.Contig1_All, CL923.Contig1_All, CL923.Contig2_All, CL923.Contig3_All, Unigene10097_All, Unigene10201_All, Unigene10202_All, Unigene1023_All, Unigene1028_All, Unigene10448_All, Unigene10998_All, Unigene11082_All, Unigene11289_All, Unigene11298_All, Unigene11300_All, Unigene1131_All, Unigene11372_All, Unigene11459_All, Unigene11521_All, Unigene11597_All, Unigene11598_All, Unigene11599_All, Unigene11935_All, Unigene12201_All, Unigene12330_All, Unigene12343_All, Unigene12418_All, Unigene12603_All, Unigene12658_All, Unigene12684_All, Unigene12697_All, Unigene12711_All, Unigene12828_All, Unigene12853_All, Unigene13092_All, Unigene13209_All, Unigene1447_All, Unigene1479_All, Unigene1496_All, Unigene15271_All, Unigene1633_All, Unigene16435_All, Unigene16510_All, Unigene16716_All, Unigene16840_All, Unigene16874_All, Unigene16963_All, Unigene16976_All, Unigene1705_All, Unigene17117_All, Unigene17362_All, Unigene1757_All, Unigene17751_All, Unigene1777_All, Unigene17824_All, Unigene18106_All, Unigene18215_All, Unigene18378_All, Unigene18598_All, Unigene18644_All, Unigene18645_All, Unigene19289_All, Unigene19364_All, Unigene19453_All, Unigene19647_All, Unigene19745_All, Unigene20065_All, Unigene20095_All, Unigene20299_All, Unigene2052_All, Unigene20530_All, Unigene2053_All, Unigene20578_All, Unigene20625_All, Unigene2067_All, Unigene210_All, Unigene220_All, Unigene237_All, Unigene2514_All, Unigene2741_All, Unigene278_All, Unigene3070_All, Unigene3094_All, Unigene327_All, Unigene3328_All, Unigene3482_All, Unigene3659_All, Unigene3696_All, Unigene4133_All, Unigene4161_All, Unigene4269_All, Unigene4692_All, Unigene4920_All, Unigene500_All, Unigene5303_All, Unigene5688_All, Unigene5873_All, Unigene5994_All, Unigene6013_All, Unigene6014_All, Unigene6029_All, Unigene6037_All, Unigene6062_All, Unigene6273_All, Unigene6896_All, Unigene6907_All, Unigene7063_All, Unigene7129_All, Unigene7829_All, Unigene7854_All, Unigene785_All, Unigene8009_All, Unigene8151_All, Unigene8184_All, Unigene9039_All, Unigene9076_All, Unigene9722_All, Unigene9785_All, Unigene9787_All, Unigene9902_All, Unigene9947_All</p> |
| 15 | <a href="#">Melanogenesis</a>        | <p>CL1286.Contig2_All, CL1452.Contig1_All, CL1685.Contig2_All, CL1823.Contig8_All, CL1843.Contig3_All, CL2131.Contig4_All, CL2131.Contig5_All, CL2131.Contig6_All, CL2131.Contig8_All, CL2170.Contig2_All, CL2170.Contig5_All, CL2182.Contig1_All, CL2182.Contig3_All, CL2182.Contig4_All, CL2208.Contig1_All, CL2468.Contig1_All, CL2468.Contig2_All, CL252.Contig2_All, CL252.Contig3_All, CL2930.Contig5_All, CL3156.Contig1_All, CL3567.Contig1_All, CL3567.Contig2_All, CL3567.Contig3_All, CL3667.Contig1_All, CL3667.Contig2_All, CL3667.Contig3_All, CL39.Contig1_All, CL39.Contig2_All, CL39.Contig3_All, CL39.Contig4_All, CL3920.Contig2_All, CL4005.Contig2_All, CL4005.Contig3_All, CL4262.Contig2_All, CL4395.Contig1_All, CL44.Contig10_All, CL44.Contig12_All, CL44.Contig13_All, CL44.Contig16_All, CL44.Contig17_All, CL44.Contig18_All, CL44.Contig19_All, CL44.Contig1_All, CL44.Contig22_All, CL44.Contig23_All, CL44.Contig2_All, CL44.Contig3_All, CL44.Contig4_All, CL44.Contig5_All, CL44.Contig6_All, CL44.Contig8_All, CL44.Contig9_All, CL440.Contig3_All, CL440.Contig5_All, CL440.Contig6_All, CL4439.Contig2_All, CL4509.Contig1_All, CL4509.Contig2_All, CL4657.Contig2_All, CL4787.Contig1_All, CL4923.Contig2_All, CL5111.Contig1_All, CL5391.Contig1_All, CL5391.Contig2_All, CL5399.Contig1_All, CL5399.Contig2_All, CL772.Contig1_All, CL772.Contig2_All, CL940.Contig3_All, CL940.Contig5_All, Unigene10006_All, Unigene10058_All, Unigene10226_All, Unigene10574_All, Unigene10747_All, Unigene1099_All, Unigene11054_All, Unigene11922_All, Unigene12315_All, Unigene12671_All, Unigene12719_All, Unigene16769_All, Unigene1743_All, Unigene176_All, Unigene18898_All, Unigene2029_All, Unigene2196_All, Unigene2209_All, Unigene236_All, Unigene247_All, Unigene2760_All, Unigene2915_All, Unigene3779_All, Unigene3975_All, Unigene3996_All, Unigene4013_All, Unigene4053_All, Unigene4070_All, Unigene4112_All, Unigene4126_All, Unigene4532_All, Unigene4731_All, Unigene5521_All, Unigene5675_All, Unigene5727_All, Unigene5781_All, Unigene6162_All, Unigene6217_All, Unigene69_All, Unigene7163_All, Unigene7297_All, Unigene766_All, Unigene777_All, Unigene783_All, Unigene8014_All, Unigene8213_All, Unigene8422_All, Unigene8784_All, Unigene8861_All, Unigene93_All, Unigene9437_All, Unigene9733_All</p>                                                                                                                                                                                                                                                                                                                                                                                                                                                                                                                                                                                                                                                                                                                                                                                                                                                                                                                                                                                                                                                                                                                                                                                                                                                                                                                                                                                                                                                                                                                                                          |

|    |                                     |                                                                                                                                                                                                                                                                                                                                                                                                                                                                                                                                                                                                                                                                                                                                                                                                                                                                                                                                                                                                                                                                                                                                                                                                                                                                                                                                                                                                                                                                                                                                                                                                                                                                                                                                                                                                                                                                                                                                                                                                                                                                                                                                                                                                                                                                                                                                                                                                                                                                                                                                                                                                                                                                                                                                                                                                                                                                                                                                                                                                                                                                                                                                                                                                                                                                                                                                                                                                                                                                                                                                                                                                                                                                                                                                                                                                                                                                                                                                                                                                                                                                                                                                                                                                                                                                                                                                                                                                                                                                                                                         |
|----|-------------------------------------|-------------------------------------------------------------------------------------------------------------------------------------------------------------------------------------------------------------------------------------------------------------------------------------------------------------------------------------------------------------------------------------------------------------------------------------------------------------------------------------------------------------------------------------------------------------------------------------------------------------------------------------------------------------------------------------------------------------------------------------------------------------------------------------------------------------------------------------------------------------------------------------------------------------------------------------------------------------------------------------------------------------------------------------------------------------------------------------------------------------------------------------------------------------------------------------------------------------------------------------------------------------------------------------------------------------------------------------------------------------------------------------------------------------------------------------------------------------------------------------------------------------------------------------------------------------------------------------------------------------------------------------------------------------------------------------------------------------------------------------------------------------------------------------------------------------------------------------------------------------------------------------------------------------------------------------------------------------------------------------------------------------------------------------------------------------------------------------------------------------------------------------------------------------------------------------------------------------------------------------------------------------------------------------------------------------------------------------------------------------------------------------------------------------------------------------------------------------------------------------------------------------------------------------------------------------------------------------------------------------------------------------------------------------------------------------------------------------------------------------------------------------------------------------------------------------------------------------------------------------------------------------------------------------------------------------------------------------------------------------------------------------------------------------------------------------------------------------------------------------------------------------------------------------------------------------------------------------------------------------------------------------------------------------------------------------------------------------------------------------------------------------------------------------------------------------------------------------------------------------------------------------------------------------------------------------------------------------------------------------------------------------------------------------------------------------------------------------------------------------------------------------------------------------------------------------------------------------------------------------------------------------------------------------------------------------------------------------------------------------------------------------------------------------------------------------------------------------------------------------------------------------------------------------------------------------------------------------------------------------------------------------------------------------------------------------------------------------------------------------------------------------------------------------------------------------------------------------------------------------------------------------------------|
| 16 | <a href="#">Parkinson's disease</a> | <p>CL1146.Contig2_All, CL1146.Contig3_All, CL1594.Contig1_All, CL1798.Contig1_All, CL1798.Contig2_All, CL1991.Contig2_All, CL1991.Contig3_All, CL1991.Contig4_All, CL1995.Contig1_All, CL1995.Contig2_All, CL1995.Contig3_All, CL2091.Contig5_All, CL2091.Contig6_All, CL2128.Contig1_All, CL2164.Contig2_All, CL2678.Contig1_All, CL2678.Contig2_All, CL2882.Contig1_All, CL2882.Contig2_All, CL3019.Contig2_All, CL3019.Contig3_All, CL3019.Contig4_All, CL3135.Contig1_All, CL3135.Contig2_All, CL3135.Contig3_All, CL3286.Contig1_All, CL3730.Contig1_All, CL4105.Contig2_All, CL4304.Contig1_All, CL4304.Contig2_All, CL4365.Contig1_All, CL4663.Contig1_All, CL475.Contig4_All, CL4757.Contig2_All, CL4872.Contig1_All, CL4872.Contig2_All, CL4881.Contig2_All, CL5010.Contig2_All, CL5012.Contig1_All, CL5078.Contig12_All, CL5078.Contig8_All, CL527.Contig2_All, CL527.Contig3_All, CL5299.Contig1_All, CL584.Contig17_All, CL851.Contig3_All, CL962.Contig3_All, Unigene10037_All, Unigene10073_All, Unigene10338_All, Unigene10570_All, Unigene10674_All, Unigene10675_All, Unigene10716_All, Unigene10817_All, Unigene10839_All, Unigene10846_All, Unigene10849_All, Unigene10856_All, Unigene10898_All, Unigene10899_All, Unigene10913_All, Unigene10919_All, Unigene10962_All, Unigene10968_All, Unigene10975_All, Unigene10988_All, Unigene10989_All, Unigene11009_All, Unigene11010_All, Unigene11028_All, Unigene11046_All, Unigene11047_All, Unigene11074_All, Unigene11103_All, Unigene11104_All, Unigene11107_All, Unigene11108_All, Unigene11109_All, Unigene11136_All, Unigene11148_All, Unigene11149_All, Unigene11158_All, Unigene11404_All, Unigene11415_All, Unigene11419_All, Unigene11420_All, Unigene11422_All, Unigene11440_All, Unigene11445_All, Unigene11450_All, Unigene11465_All, Unigene11494_All, Unigene11534_All, Unigene11568_All, Unigene11613_All, Unigene11614_All, Unigene11724_All, Unigene11756_All, Unigene11778_All, Unigene11786_All, Unigene11792_All, Unigene11796_All, Unigene11802_All, Unigene11806_All, Unigene11809_All, Unigene11817_All, Unigene11819_All, Unigene11828_All, Unigene11832_All, Unigene11833_All, Unigene11836_All, Unigene11851_All, Unigene11853_All, Unigene11860_All, Unigene11864_All, Unigene11868_All, Unigene11870_All, Unigene11871_All, Unigene11898_All, Unigene11904_All, Unigene11909_All, Unigene11912_All, Unigene11918_All, Unigene11921_All, Unigene11926_All, Unigene11948_All, Unigene11968_All, Unigene12004_All, Unigene12013_All, Unigene12018_All, Unigene12051_All, Unigene12062_All, Unigene12065_All, Unigene12067_All, Unigene12075_All, Unigene12081_All, Unigene12135_All, Unigene12157_All, Unigene12162_All, Unigene12188_All, Unigene12207_All, Unigene12232_All, Unigene12256_All, Unigene12279_All, Unigene12286_All, Unigene12329_All, Unigene12331_All, Unigene12384_All, Unigene12437_All, Unigene12502_All, Unigene12512_All, Unigene12602_All, Unigene12744_All, Unigene12800_All, Unigene12812_All, Unigene12873_All, Unigene12912_All, Unigene12917_All, Unigene12966_All, Unigene13177_All, Unigene13422_All, Unigene13498_All, Unigene13638_All, Unigene1459_All, Unigene1515_All, Unigene15327_All, Unigene15384_All, Unigene1544_All, Unigene15629_All, Unigene15855_All, Unigene15950_All, Unigene16204_All, Unigene16218_All, Unigene1634_All, Unigene16538_All, Unigene16599_All, Unigene16616_All, Unigene16660_All, Unigene16672_All, Unigene16761_All, Unigene16807_All, Unigene17278_All, Unigene17406_All, Unigene17468_All, Unigene17478_All, Unigene17618_All, Unigene17674_All, Unigene17675_All, Unigene17702_All, Unigene17865_All, Unigene18145_All, Unigene18284_All, Unigene18358_All, Unigene1843_All, Unigene18538_All, Unigene18539_All, Unigene19116_All, Unigene19218_All, Unigene19351_All, Unigene19388_All, Unigene19418_All, Unigene19523_All, Unigene19555_All, Unigene19602_All, Unigene20025_All, Unigene20614_All, Unigene21092_All, Unigene21282_All, Unigene2193_All, Unigene2380_All, Unigene2626_All, Unigene2835_All, Unigene314_All, Unigene3691_All, Unigene3791_All, Unigene4116_All, Unigene4581_All, Unigene5203_All, Unigene5605_All, Unigene6309_All, Unigene6369_All, Unigene6605_All, Unigene6931_All, Unigene7049_All, Unigene7205_All, Unigene7298_All, Unigene7387_All, Unigene7799_All, Unigene8605_All, Unigene883_All, Unigene9282_All, Unigene9312_All, Unigene9663_All, Unigene9664_All, Unigene9989_All, Unigene9995_All, Unigene9996_All</p> |
| 17 | <a href="#">Salivary secretion</a>  | <p>CL126.Contig2_All, CL1286.Contig2_All, CL1452.Contig1_All, CL1453.Contig2_All, CL1507.Contig1_All, CL1507.Contig2_All, CL1559.Contig1_All, CL1613.Contig1_All, CL1823.Contig8_All, CL1880.Contig1_All, CL1880.Contig2_All, CL1880.Contig3_All, CL191.Contig1_All, CL191.Contig2_All, CL1987.Contig1_All, CL2131.Contig4_All, CL2131.Contig5_All, CL2131.Contig6_All, CL2131.Contig8_All, CL2137.Contig1_All, CL2137.Contig2_All, CL2182.Contig1_All, CL2182.Contig3_All, CL2182.Contig4_All, CL2468.Contig1_All, CL2468.Contig2_All, CL2474.Contig2_All, CL2478.Contig2_All, CL2734.Contig1_All, CL2930.Contig5_All, CL2975.Contig2_All, CL3027.Contig2_All, CL3311.Contig1_All, CL3311.Contig2_All, CL3489.Contig1_All, CL3667.Contig1_All, CL3667.Contig2_All, CL3667.Contig3_All, CL3776.Contig2_All, CL39.Contig1_All, CL39.Contig2_All, CL39.Contig3_All, CL39.Contig4_All, CL4005.Contig2_All, CL4005.Contig3_All, CL4084.Contig1_All, CL4084.Contig2_All, CL41.Contig3_All, CL41.Contig4_All, CL41.Contig8_All, CL4130.Contig2_All, CL4181.Contig1_All, CL4181.Contig4_All, CL4262.Contig2_All, CL4395.Contig1_All, CL440.Contig3_All, CL440.Contig5_All, CL440.Contig6_All, CL4509.Contig1_All, CL4509.Contig2_All, CL467.Contig2_All, CL4917.Contig1_All, CL5308.Contig1_All, CL5372.Contig2_All, CL5391.Contig1_All, CL5391.Contig2_All, CL5399.Contig1_All, CL5399.Contig2_All, CL573.Contig6_All, CL600.Contig1_All, CL600.Contig2_All, CL600.Contig3_All, CL600.Contig4_All, CL600.Contig6_All, CL648.Contig2_All, CL691.Contig1_All, CL718.Contig1_All, CL772.Contig1_All, CL772.Contig2_All, CL847.Contig1_All, CL878.Contig1_All, CL878.Contig2_All, CL878.Contig3_All, CL878.Contig4_All, CL878.Contig5_All, CL940.Contig3_All, CL940.Contig5_All, Unigene10006_All, Unigene10058_All, Unigene10574_All, Unigene10594_All, Unigene11054_All, Unigene11480_All, Unigene11482_All, Unigene11483_All, Unigene11694_All, Unigene11730_All, Unigene11863_All, Unigene11973_All, Unigene12016_All, Unigene12170_All, Unigene12315_All, Unigene125_All, Unigene12719_All, Unigene12926_All, Unigene15176_All, Unigene15194_All, Unigene15195_All, Unigene15815_All, Unigene1671_All, Unigene16769_All, Unigene18179_All, Unigene18652_All, Unigene18898_All, Unigene18993_All, Unigene19223_All, Unigene20111_All, Unigene2029_All, Unigene2209_All, Unigene2236_All, Unigene2250_All, Unigene2274_All, Unigene2476_All, Unigene2763_All, Unigene2795_All, Unigene3010_All, Unigene3177_All, Unigene3779_All, Unigene3861_All, Unigene3996_All, Unigene4013_All, Unigene4053_All, Unigene4070_All, Unigene4112_All, Unigene4323_All, Unigene4532_All, Unigene4783_All, Unigene490_All, Unigene5086_All, Unigene5105_All, Unigene5303_All, Unigene554_All, Unigene5675_All, Unigene5724_All, Unigene6215_All, Unigene62_All, Unigene6597_All, Unigene7054_All, Unigene7102_All, Unigene7206_All, Unigene7284_All, Unigene8109_All, Unigene8208_All, Unigene8422_All, Unigene8464_All, Unigene8700_All, Unigene8770_All, Unigene9122_All, Unigene9163_All, Unigene93_All, Unigene9437_All, Unigene9733_All</p>                                                                                                                                                                                                                                                                                                                                                                                                                                                                                                                                                                                                                                                                                                                                                                                                                                                                                                                                                                                                                                                                                                                                                                                                                                                                                                                                                                                               |

|    |                                        |                                                                                                                                                                                                                                                                                                                                                                                                                                                                                                                                                                                                                                                                                                                                                                                                                                                                                                                                                                                                                                                                                                                                                                                                                                                                                                                                                                                                                                                                                                                                                                                                                                                                                                                                                                                                                                                                                                                                                                                                                                                                                                                                                                                                                                                                                                                                                                                                                                                                                                                                                                                                                                                                                                                                                                                                                                                                                                                                                                                                                                                                                                                                                                                                                                                                                                                                                                                                                                                                                                                                                                                   |
|----|----------------------------------------|-----------------------------------------------------------------------------------------------------------------------------------------------------------------------------------------------------------------------------------------------------------------------------------------------------------------------------------------------------------------------------------------------------------------------------------------------------------------------------------------------------------------------------------------------------------------------------------------------------------------------------------------------------------------------------------------------------------------------------------------------------------------------------------------------------------------------------------------------------------------------------------------------------------------------------------------------------------------------------------------------------------------------------------------------------------------------------------------------------------------------------------------------------------------------------------------------------------------------------------------------------------------------------------------------------------------------------------------------------------------------------------------------------------------------------------------------------------------------------------------------------------------------------------------------------------------------------------------------------------------------------------------------------------------------------------------------------------------------------------------------------------------------------------------------------------------------------------------------------------------------------------------------------------------------------------------------------------------------------------------------------------------------------------------------------------------------------------------------------------------------------------------------------------------------------------------------------------------------------------------------------------------------------------------------------------------------------------------------------------------------------------------------------------------------------------------------------------------------------------------------------------------------------------------------------------------------------------------------------------------------------------------------------------------------------------------------------------------------------------------------------------------------------------------------------------------------------------------------------------------------------------------------------------------------------------------------------------------------------------------------------------------------------------------------------------------------------------------------------------------------------------------------------------------------------------------------------------------------------------------------------------------------------------------------------------------------------------------------------------------------------------------------------------------------------------------------------------------------------------------------------------------------------------------------------------------------------------|
| 18 | <a href="#">Gastric acid secretion</a> | CL1068.Contig5_All, CL1286.Contig2_All, CL1355.Contig1_All, CL1452.Contig1_All, CL156.Contig1_All, CL156.Contig3_All, CL156.Contig4_All, CL1803.Contig1_All, CL1823.Contig8_All, CL2039.Contig1_All, CL2061.Contig1_All, CL2131.Contig4_All, CL2131.Contig5_All, CL2131.Contig6_All, CL2131.Contig8_All, CL2137.Contig1_All, CL2137.Contig2_All, CL214.Contig3_All, CL2182.Contig1_All, CL2182.Contig3_All, CL2182.Contig4_All, CL2468.Contig1_All, CL2468.Contig2_All, CL2474.Contig2_All, CL263.Contig3_All, CL2720.Contig1_All, CL2930.Contig5_All, CL305.Contig2_All, CL336.Contig1_All, CL336.Contig2_All, CL3500.Contig1_All, CL3525.Contig1_All, CL3525.Contig2_All, CL3545.Contig2_All, CL3667.Contig1_All, CL3667.Contig2_All, CL3667.Contig3_All, CL3776.Contig2_All, CL39.Contig1_All, CL39.Contig2_All, CL39.Contig3_All, CL39.Contig4_All, CL392.Contig1_All, CL392.Contig2_All, CL392.Contig3_All, CL4005.Contig2_All, CL4005.Contig3_All, CL41.Contig3_All, CL41.Contig4_All, CL41.Contig8_All, CL4216.Contig1_All, CL4216.Contig2_All, CL4262.Contig2_All, CL4395.Contig1_All, CL44.Contig10_All, CL44.Contig12_All, CL44.Contig13_All, CL44.Contig16_All, CL44.Contig17_All, CL44.Contig18_All, CL44.Contig19_All, CL44.Contig1_All, CL44.Contig22_All, CL44.Contig23_All, CL44.Contig2_All, CL44.Contig3_All, CL44.Contig4_All, CL44.Contig5_All, CL44.Contig6_All, CL44.Contig8_All, CL44.Contig9_All, CL440.Contig3_All, CL440.Contig5_All, CL440.Contig6_All, CL4402.Contig1_All, CL4509.Contig1_All, CL4509.Contig2_All, CL4637.Contig1_All, CL4862.Contig1_All, CL4928.Contig1_All, CL4928.Contig2_All, CL5061.Contig2_All, CL5246.Contig3_All, CL5391.Contig1_All, CL5391.Contig2_All, CL5399.Contig1_All, CL5399.Contig2_All, CL5441.Contig3_All, CL5468.Contig3_All, CL571.Contig2_All, CL600.Contig1_All, CL600.Contig2_All, CL600.Contig3_All, CL600.Contig4_All, CL600.Contig6_All, CL691.Contig1_All, CL772.Contig1_All, CL772.Contig2_All, CL916.Contig2_All, CL940.Contig3_All, CL940.Contig5_All, CL970.Contig2_All, CL974.Contig2_All, Unigene10006_All, Unigene10058_All, Unigene10574_All, Unigene10594_All, Unigene11054_All, Unigene1111_All, Unigene1137_All, Unigene11480_All, Unigene11482_All, Unigene11483_All, Unigene11597_All, Unigene11598_All, Unigene11599_All, Unigene12315_All, Unigene1257_All, Unigene12684_All, Unigene12719_All, Unigene13092_All, Unigene1427_All, Unigene15194_All, Unigene15195_All, Unigene16098_All, Unigene16769_All, Unigene16994_All, Unigene17815_All, Unigene18178_All, Unigene18276_All, Unigene18598_All, Unigene18898_All, Unigene18993_All, Unigene1974_All, Unigene2002_All, Unigene2003_All, Unigene20111_All, Unigene2029_All, Unigene21008_All, Unigene2145_All, Unigene214_All, Unigene2209_All, Unigene24_All, Unigene2741_All, Unigene278_All, Unigene3010_All, Unigene3471_All, Unigene3748_All, Unigene3779_All, Unigene3996_All, Unigene4013_All, Unigene4053_All, Unigene4070_All, Unigene4112_All, Unigene4211_All, Unigene4323_All, Unigene4532_All, Unigene5088_All, Unigene5521_All, Unigene5675_All, Unigene5724_All, Unigene5821_All, Unigene5993_All, Unigene6059_All, Unigene6073_All, Unigene6215_All, Unigene6217_All, Unigene6525_All, Unigene6972_All, Unigene7061_All, Unigene7110_All, Unigene7206_All, Unigene7993_All, Unigene8017_All, Unigene8422_All, Unigene8464_All, Unigene8615_All, Unigene8770_All, Unigene9014_All, Unigene9059_All, Unigene9071_All, Unigene9163_All, Unigene93_All, Unigene9437_All, Unigene9668_All, Unigene9733_All, Unigene9836_All |
|----|----------------------------------------|-----------------------------------------------------------------------------------------------------------------------------------------------------------------------------------------------------------------------------------------------------------------------------------------------------------------------------------------------------------------------------------------------------------------------------------------------------------------------------------------------------------------------------------------------------------------------------------------------------------------------------------------------------------------------------------------------------------------------------------------------------------------------------------------------------------------------------------------------------------------------------------------------------------------------------------------------------------------------------------------------------------------------------------------------------------------------------------------------------------------------------------------------------------------------------------------------------------------------------------------------------------------------------------------------------------------------------------------------------------------------------------------------------------------------------------------------------------------------------------------------------------------------------------------------------------------------------------------------------------------------------------------------------------------------------------------------------------------------------------------------------------------------------------------------------------------------------------------------------------------------------------------------------------------------------------------------------------------------------------------------------------------------------------------------------------------------------------------------------------------------------------------------------------------------------------------------------------------------------------------------------------------------------------------------------------------------------------------------------------------------------------------------------------------------------------------------------------------------------------------------------------------------------------------------------------------------------------------------------------------------------------------------------------------------------------------------------------------------------------------------------------------------------------------------------------------------------------------------------------------------------------------------------------------------------------------------------------------------------------------------------------------------------------------------------------------------------------------------------------------------------------------------------------------------------------------------------------------------------------------------------------------------------------------------------------------------------------------------------------------------------------------------------------------------------------------------------------------------------------------------------------------------------------------------------------------------------------|



19

[Endocytosis](#)

CL102.Contig1\_All, CL102.Contig2\_All, CL1054.Contig1\_All, CL1054.Contig2\_All, CL1066.Contig2\_All, CL1066.Contig3\_All, CL1155.Contig1\_All, CL1155.Contig2\_All, CL1155.Contig3\_All, CL1225.Contig6\_All, CL1435.Contig1\_All, CL1435.Contig2\_All, CL1435.Contig3\_All, CL1435.Contig4\_All, CL1522.Contig10\_All, CL1522.Contig1\_All, CL1534.Contig1\_All, CL1534.Contig2\_All, CL1546.Contig1\_All, CL1546.Contig3\_All, CL1546.Contig4\_All, CL1546.Contig5\_All, CL1546.Contig6\_All, CL1546.Contig7\_All, CL1546.Contig8\_All, CL1548.Contig2\_All, CL1548.Contig3\_All, CL1622.Contig1\_All, CL1622.Contig2\_All, CL1622.Contig3\_All, CL1845.Contig1\_All, CL1901.Contig3\_All, CL1925.Contig1\_All, CL1953.Contig1\_All, CL1974.Contig1\_All, CL1974.Contig2\_All, CL2019.Contig1\_All, CL2019.Contig2\_All, CL2068.Contig5\_All, CL2165.Contig2\_All, CL2190.Contig2\_All, CL2224.Contig2\_All, CL2224.Contig3\_All, CL2224.Contig4\_All, CL2355.Contig1\_All, CL241.Contig1\_All, CL241.Contig7\_All, CL2441.Contig1\_All, CL2441.Contig2\_All, CL2642.Contig1\_All, CL2642.Contig2\_All, CL2658.Contig1\_All, CL2658.Contig2\_All, CL2663.Contig1\_All, CL2663.Contig2\_All, CL2674.Contig1\_All, CL2674.Contig2\_All, CL2674.Contig3\_All, CL2675.Contig1\_All, CL2675.Contig2\_All, CL2686.Contig1\_All, CL2686.Contig2\_All, CL271.Contig2\_All, CL2734.Contig1\_All, CL2853.Contig1\_All, CL2853.Contig4\_All, CL309.Contig2\_All, CL309.Contig3\_All, CL309.Contig4\_All, CL3183.Contig2\_All, CL3188.Contig1\_All, CL3188.Contig2\_All, CL3200.Contig2\_All, CL3221.Contig1\_All, CL3270.Contig2\_All, CL3274.Contig1\_All, CL3332.Contig1\_All, CL3332.Contig2\_All, CL3460.Contig2\_All, CL3460.Contig3\_All, CL3526.Contig5\_All, CL3694.Contig1\_All, CL3694.Contig2\_All, CL3738.Contig1\_All, CL3845.Contig1\_All, CL3959.Contig1\_All, CL3959.Contig2\_All, CL3967.Contig2\_All, CL399.Contig10\_All, CL399.Contig1\_All, CL399.Contig2\_All, CL399.Contig3\_All, CL399.Contig4\_All, CL399.Contig5\_All, CL399.Contig6\_All, CL399.Contig7\_All, CL399.Contig8\_All, CL399.Contig9\_All, CL4040.Contig1\_All, CL4187.Contig1\_All, CL4228.Contig1\_All, CL4228.Contig2\_All, CL4250.Contig2\_All, CL4271.Contig1\_All, CL4273.Contig2\_All, CL4381.Contig1\_All, CL4439.Contig2\_All, CL4541.Contig1\_All, CL4541.Contig2\_All, CL4591.Contig2\_All, CL4596.Contig2\_All, CL4722.Contig2\_All, CL4748.Contig2\_All, CL4765.Contig1\_All, CL4765.Contig2\_All, CL4766.Contig1\_All, CL4766.Contig2\_All, CL4789.Contig2\_All, CL495.Contig11\_All, CL495.Contig1\_All, CL495.Contig3\_All, CL495.Contig4\_All, CL495.Contig5\_All, CL495.Contig6\_All, CL5256.Contig1\_All, CL5256.Contig2\_All, CL5256.Contig4\_All, CL5272.Contig1\_All, CL5466.Contig1\_All, CL558.Contig1\_All, CL558.Contig2\_All, CL558.Contig4\_All, CL58.Contig1\_All, CL58.Contig2\_All, CL622.Contig1\_All, CL622.Contig2\_All, CL622.Contig4\_All, CL724.Contig1\_All, CL95.Contig1\_All, Unigene10664\_All, Unigene1074\_All, Unigene10837\_All, Unigene10855\_All, Unigene11086\_All, Unigene11264\_All, Unigene11265\_All, Unigene11307\_All, Unigene1131\_All, Unigene1142\_All, Unigene11446\_All, Unigene11549\_All, Unigene12044\_All, Unigene12328\_All, Unigene12517\_All, Unigene12810\_All, Unigene12813\_All, Unigene12853\_All, Unigene13225\_All, Unigene13732\_All, Unigene13978\_All, Unigene14005\_All, Unigene14401\_All, Unigene15587\_All, Unigene15863\_All, Unigene16093\_All, Unigene16747\_All, Unigene1679\_All, Unigene1769\_All, Unigene18106\_All, Unigene18535\_All, Unigene18600\_All, Unigene18950\_All, Unigene1935\_All, Unigene20226\_All, Unigene20260\_All, Unigene2053\_All, Unigene2247\_All, Unigene2279\_All, Unigene2667\_All, Unigene322\_All, Unigene3684\_All, Unigene3819\_All, Unigene4137\_All, Unigene4149\_All, Unigene4671\_All, Unigene4753\_All, Unigene4789\_All, Unigene4801\_All, Unigene555\_All, Unigene5651\_All, Unigene5664\_All, Unigene5716\_All, Unigene5808\_All, Unigene5835\_All, Unigene5875\_All, Unigene5912\_All, Unigene6013\_All, Unigene6550\_All, Unigene6706\_All, Unigene6907\_All, Unigene699\_All, Unigene7018\_All, Unigene7056\_All, Unigene7108\_All, Unigene7129\_All, Unigene7348\_All, Unigene746\_All, Unigene7751\_All, Unigene781\_All, Unigene7838\_All, Unigene8046\_All, Unigene8151\_All, Unigene8662\_All, Unigene8737\_All, Unigene8933\_All, Unigene8937\_All, Unigene9050\_All, Unigene9661\_All, Unigene9730\_All, Unigene9759\_All, Unigene9877\_All, Unigene9921\_All, Unigene9971\_All

|    |                                                                           |                                                                                                                                                                                                                                                                                                                                                                                                                                                                                                                                                                                                                                                                                                                                                                                                                                                                                                                                                                                                                                                                                                                                                                                                                                                                                                                                                                                                                                                                                                                                                                                                                                                                                                                                                                                                                                                                                                                                                                                                                                                                                                                                                                                                                                                                                                                                                                                                                                                                                                                                                                                                                                                                                                                                                                                                                                                                                                                                                                                                                                                                                                                                                                                                                                                                                                                                                                                                                                                                              |
|----|---------------------------------------------------------------------------|------------------------------------------------------------------------------------------------------------------------------------------------------------------------------------------------------------------------------------------------------------------------------------------------------------------------------------------------------------------------------------------------------------------------------------------------------------------------------------------------------------------------------------------------------------------------------------------------------------------------------------------------------------------------------------------------------------------------------------------------------------------------------------------------------------------------------------------------------------------------------------------------------------------------------------------------------------------------------------------------------------------------------------------------------------------------------------------------------------------------------------------------------------------------------------------------------------------------------------------------------------------------------------------------------------------------------------------------------------------------------------------------------------------------------------------------------------------------------------------------------------------------------------------------------------------------------------------------------------------------------------------------------------------------------------------------------------------------------------------------------------------------------------------------------------------------------------------------------------------------------------------------------------------------------------------------------------------------------------------------------------------------------------------------------------------------------------------------------------------------------------------------------------------------------------------------------------------------------------------------------------------------------------------------------------------------------------------------------------------------------------------------------------------------------------------------------------------------------------------------------------------------------------------------------------------------------------------------------------------------------------------------------------------------------------------------------------------------------------------------------------------------------------------------------------------------------------------------------------------------------------------------------------------------------------------------------------------------------------------------------------------------------------------------------------------------------------------------------------------------------------------------------------------------------------------------------------------------------------------------------------------------------------------------------------------------------------------------------------------------------------------------------------------------------------------------------------------------------|
| 20 | <a href="#">Phagosome</a>                                                 | <p>CL1085.Contig3_All, CL1355.Contig1_All, CL1358.Contig1_All, CL1358.Contig2_All, CL1358.Contig3_All, CL1534.Contig1_All, CL1534.Contig2_All, CL1535.Contig3_All, CL156.Contig1_All, CL156.Contig3_All, CL156.Contig4_All, CL1776.Contig1_All, CL1803.Contig1_All, CL2150.Contig3_All, CL2190.Contig2_All, CL2224.Contig2_All, CL2224.Contig3_All, CL2224.Contig4_All, CL2355.Contig1_All, CL2437.Contig1_All, CL2437.Contig2_All, CL2634.Contig1_All, CL2634.Contig2_All, CL2750.Contig3_All, CL3091.Contig1_All, CL3091.Contig2_All, CL3091.Contig3_All, CL3091.Contig4_All, CL3221.Contig1_All, CL326.Contig1_All, CL3274.Contig1_All, CL3282.Contig1_All, CL3282.Contig2_All, CL3282.Contig3_All, CL3506.Contig1_All, CL3506.Contig2_All, CL3706.Contig1_All, CL3884.Contig2_All, CL4057.Contig1_All, CL4090.Contig2_All, CL4187.Contig1_All, CL4247.Contig2_All, CL4247.Contig3_All, CL4250.Contig2_All, CL4317.Contig1_All, CL4459.Contig1_All, CL4576.Contig1_All, CL4596.Contig2_All, CL4633.Contig1_All, CL4633.Contig2_All, CL4661.Contig1_All, CL4661.Contig2_All, CL4666.Contig1_All, CL4666.Contig2_All, CL4776.Contig1_All, CL4776.Contig2_All, CL4857.Contig1_All, CL5034.Contig1_All, CL5034.Contig2_All, CL5149.Contig1_All, CL5149.Contig2_All, CL5186.Contig2_All, CL5207.Contig2_All, CL5466.Contig1_All, CL5468.Contig3_All, CL621.Contig2_All, CL621.Contig4_All, CL621.Contig5_All, CL724.Contig1_All, Unigene10026_All, Unigene10125_All, Unigene10126_All, Unigene10128_All, Unigene1016_All, Unigene1017_All, Unigene1028_All, Unigene10296_All, Unigene10423_All, Unigene10424_All, Unigene10433_All, Unigene10483_All, Unigene10503_All, Unigene1050_All, Unigene11121_All, Unigene11130_All, Unigene11240_All, Unigene11270_All, Unigene11282_All, Unigene1131_All, Unigene11369_All, Unigene11375_All, Unigene11395_All, Unigene11564_All, Unigene11589_All, Unigene11597_All, Unigene11598_All, Unigene11599_All, Unigene11845_All, Unigene11879_All, Unigene11884_All, Unigene11899_All, Unigene1189_All, Unigene11901_All, Unigene11908_All, Unigene11973_All, Unigene11992_All, Unigene12028_All, Unigene12168_All, Unigene12203_All, Unigene12209_All, Unigene12302_All, Unigene12330_All, Unigene12343_All, Unigene12423_All, Unigene12684_All, Unigene12710_All, Unigene12713_All, Unigene12853_All, Unigene12923_All, Unigene13092_All, Unigene13324_All, Unigene13396_All, Unigene13508_All, Unigene13589_All, Unigene13732_All, Unigene15308_All, Unigene15969_All, Unigene16098_All, Unigene16747_All, Unigene1741_All, Unigene17602_All, Unigene18095_All, Unigene18106_All, Unigene18114_All, Unigene18195_All, Unigene18598_All, Unigene18707_All, Unigene18950_All, Unigene19920_All, Unigene20095_All, Unigene20260_All, Unigene2053_All, Unigene2111_All, Unigene2275_All, Unigene2741_All, Unigene278_All, Unigene2961_All, Unigene2982_All, Unigene3094_All, Unigene3157_All, Unigene3351_All, Unigene3730_All, Unigene3945_All, Unigene4159_All, Unigene4207_All, Unigene420_All, Unigene44_All, Unigene4921_All, Unigene5448_All, Unigene5688_All, Unigene6013_All, Unigene615_All, Unigene6907_All, Unigene6915_All, Unigene6916_All, Unigene7056_All, Unigene7129_All, Unigene7723_All, Unigene7767_All, Unigene8151_All, Unigene8662_All, Unigene8737_All, Unigene9217_All, Unigene9229_All, Unigene9251_All, Unigene925_All, Unigene9604_All, Unigene9928_All, Unigene9972_All, Unigene9973_All, Unigene9984_All</p> |
| 21 | <a href="#">Endocrine and other factor-regulated calcium reabsorption</a> | <p>CL1452.Contig1_All, CL1880.Contig1_All, CL1880.Contig2_All, CL1880.Contig3_All, CL2019.Contig1_All, CL2019.Contig2_All, CL2137.Contig1_All, CL2137.Contig2_All, CL2182.Contig1_All, CL2182.Contig3_All, CL2182.Contig4_All, CL2474.Contig2_All, CL2711.Contig1_All, CL2711.Contig2_All, CL2930.Contig5_All, CL3200.Contig2_All, CL3776.Contig2_All, CL39.Contig1_All, CL39.Contig2_All, CL39.Contig3_All, CL39.Contig4_All, CL399.Contig10_All, CL399.Contig1_All, CL399.Contig2_All, CL399.Contig3_All, CL399.Contig4_All, CL399.Contig5_All, CL399.Contig6_All, CL399.Contig7_All, CL399.Contig8_All, CL399.Contig9_All, CL4084.Contig1_All, CL4084.Contig2_All, CL41.Contig3_All, CL41.Contig4_All, CL41.Contig8_All, CL4362.Contig1_All, CL4362.Contig2_All, CL440.Contig3_All, CL440.Contig5_All, CL440.Contig6_All, CL4541.Contig1_All, CL4541.Contig2_All, CL495.Contig11_All, CL495.Contig1_All, CL495.Contig3_All, CL495.Contig4_All, CL495.Contig5_All, CL495.Contig6_All, CL531.Contig1_All, CL5391.Contig1_All, CL5391.Contig2_All, CL5399.Contig1_All, CL5399.Contig2_All, CL573.Contig6_All, CL703.Contig2_All, CL703.Contig3_All, CL703.Contig5_All, CL703.Contig6_All, CL878.Contig1_All, CL878.Contig2_All, CL878.Contig3_All, CL878.Contig4_All, CL878.Contig5_All, CL940.Contig3_All, CL940.Contig5_All, Unigene10058_All, Unigene10594_All, Unigene11086_All, Unigene11480_All, Unigene11482_All, Unigene11483_All, Unigene13225_All, Unigene13978_All, Unigene14005_All, Unigene18898_All, Unigene2029_All, Unigene2209_All, Unigene2274_All, Unigene2763_All, Unigene3010_All, Unigene3177_All, Unigene3779_All, Unigene4053_All, Unigene4070_All, Unigene4112_All, Unigene4323_All, Unigene4532_All, Unigene5716_All, Unigene5724_All, Unigene6215_All, Unigene62_All, Unigene6597_All, Unigene7206_All, Unigene7751_All, Unigene8422_All, Unigene8700_All, Unigene9437_All, Unigene9733_All</p>                                                                                                                                                                                                                                                                                                                                                                                                                                                                                                                                                                                                                                                                                                                                                                                                                                                                                                                                                                                                                                                                                                                                                                                                                                                                                                                                                                                                                                                                                                                                                   |

22

[Calcium signaling pathway](#)

CL1015.Contig11\_All, CL1015.Contig27\_All, CL1015.Contig9\_All, CL1068.Contig5\_All, CL1087.Contig2\_All, CL1087.Contig3\_All, CL1286.Contig2\_All, CL1385.Contig1\_All, CL1385.Contig2\_All, CL1452.Contig1\_All, CL1525.Contig14\_All, CL1525.Contig15\_All, CL1525.Contig9\_All, CL1548.Contig2\_All, CL1548.Contig3\_All, CL1764.Contig2\_All, CL1823.Contig8\_All, CL187.Contig3\_All, CL1880.Contig1\_All, CL1880.Contig2\_All, CL1880.Contig3\_All, CL1887.Contig2\_All, CL191.Contig1\_All, CL191.Contig2\_All, CL1920.Contig1\_All, CL1920.Contig2\_All, CL1991.Contig2\_All, CL1991.Contig3\_All, CL1991.Contig4\_All, CL2039.Contig1\_All, CL2061.Contig1\_All, CL2131.Contig4\_All, CL2131.Contig5\_All, CL2131.Contig6\_All, CL2131.Contig8\_All, CL2182.Contig1\_All, CL2182.Contig3\_All, CL2182.Contig4\_All, CL2468.Contig1\_All, CL2468.Contig2\_All, CL260.Contig15\_All, CL270.Contig1\_All, CL270.Contig2\_All, CL2734.Contig1\_All, CL2762.Contig4\_All, CL2835.Contig1\_All, CL2835.Contig2\_All, CL2835.Contig3\_All, CL2835.Contig4\_All, CL2930.Contig5\_All, CL2944.Contig1\_All, CL2944.Contig2\_All, CL305.Contig2\_All, CL3136.Contig1\_All, CL336.Contig1\_All, CL336.Contig2\_All, CL3500.Contig1\_All, CL3525.Contig1\_All, CL3525.Contig2\_All, CL3545.Contig2\_All, CL3667.Contig1\_All, CL3667.Contig2\_All, CL3667.Contig3\_All, CL39.Contig1\_All, CL39.Contig2\_All, CL39.Contig3\_All, CL39.Contig4\_All, CL392.Contig1\_All, CL392.Contig2\_All, CL392.Contig3\_All, CL3948.Contig1\_All, CL3979.Contig1\_All, CL3979.Contig2\_All, CL4004.Contig1\_All, CL4004.Contig2\_All, CL4005.Contig2\_All, CL4005.Contig3\_All, CL4084.Contig1\_All, CL4084.Contig2\_All, CL4105.Contig2\_All, CL4216.Contig1\_All, CL4216.Contig2\_All, CL4262.Contig2\_All, CL4395.Contig1\_All, CL44.Contig10\_All, CL44.Contig12\_All, CL44.Contig13\_All, CL44.Contig16\_All, CL44.Contig17\_All, CL44.Contig18\_All, CL44.Contig19\_All, CL44.Contig1\_All, CL44.Contig22\_All, CL44.Contig23\_All, CL44.Contig2\_All, CL44.Contig3\_All, CL44.Contig4\_All, CL44.Contig5\_All, CL44.Contig6\_All, CL44.Contig8\_All, CL44.Contig9\_All, CL440.Contig3\_All, CL440.Contig5\_All, CL440.Contig6\_All, CL4402.Contig1\_All, CL4509.Contig1\_All, CL4509.Contig2\_All, CL4521.Contig1\_All, CL4521.Contig2\_All, CL4521.Contig3\_All, CL4521.Contig5\_All, CL4533.Contig1\_All, CL4637.Contig1\_All, CL467.Contig2\_All, CL475.Contig4\_All, CL4862.Contig1\_All, CL5061.Contig2\_All, CL5064.Contig2\_All, CL5098.Contig2\_All, CL5246.Contig3\_All, CL531.Contig1\_All, CL5310.Contig2\_All, CL5391.Contig1\_All, CL5391.Contig2\_All, CL5399.Contig1\_All, CL5399.Contig2\_All, CL5458.Contig7\_All, CL571.Contig2\_All, CL573.Contig6\_All, CL578.Contig2\_All, CL578.Contig3\_All, CL600.Contig1\_All, CL600.Contig2\_All, CL600.Contig3\_All, CL600.Contig4\_All, CL600.Contig6\_All, CL623.Contig1\_All, CL623.Contig3\_All, CL623.Contig4\_All, CL623.Contig5\_All, CL623.Contig6\_All, CL662.Contig1\_All, CL688.Contig2\_All, CL691.Contig1\_All, CL691.Contig5\_All, CL703.Contig2\_All, CL703.Contig3\_All, CL703.Contig5\_All, CL703.Contig6\_All, CL728.Contig1\_All, CL772.Contig1\_All, CL772.Contig2\_All, CL878.Contig1\_All, CL878.Contig2\_All, CL878.Contig3\_All, CL878.Contig4\_All, CL878.Contig5\_All, CL916.Contig2\_All, CL940.Contig3\_All, CL940.Contig5\_All, CL970.Contig2\_All, Unigene10006\_All, Unigene10040\_All, Unigene10058\_All, Unigene10471\_All, Unigene10574\_All, Unigene10817\_All, Unigene1099\_All, Unigene11054\_All, Unigene1137\_All, Unigene11422\_All, Unigene11446\_All, Unigene11860\_All, Unigene1186\_All, Unigene12315\_All, Unigene12331\_All, Unigene1257\_All, Unigene12719\_All, Unigene13853\_All, Unigene1417\_All, Unigene1459\_All, Unigene15194\_All, Unigene15195\_All, Unigene15855\_All, Unigene16098\_All, Unigene16538\_All, Unigene1671\_All, Unigene16769\_All, Unigene16994\_All, Unigene17478\_All, Unigene17674\_All, Unigene17675\_All, Unigene17812\_All, Unigene17815\_All, Unigene17987\_All, Unigene18178\_All, Unigene18199\_All, Unigene18276\_All, Unigene18284\_All, Unigene18898\_All, Unigene18993\_All, Unigene19116\_All, Unigene19288\_All, Unigene1974\_All, Unigene20111\_All, Unigene2032\_All, Unigene2058\_All, Unigene21008\_All, Unigene2145\_All, Unigene214\_All, Unigene2172\_All, Unigene217\_All, Unigene2209\_All, Unigene24\_All, Unigene2763\_All, Unigene3126\_All, Unigene3471\_All, Unigene3779\_All, Unigene3786\_All, Unigene3967\_All, Unigene3996\_All, Unigene4013\_All, Unigene4053\_All, Unigene4070\_All, Unigene4092\_All, Unigene4112\_All, Unigene4532\_All, Unigene5088\_All, Unigene5675\_All, Unigene5681\_All, Unigene5821\_All, Unigene5993\_All, Unigene6059\_All, Unigene6073\_All, Unigene6242\_All, Unigene6525\_All, Unigene661\_All, Unigene6640\_All, Unigene699\_All, Unigene7042\_All, Unigene7993\_All, Unigene8017\_All, Unigene8019\_All, Unigene807\_All, Unigene8210\_All, Unigene8422\_All, Unigene8605\_All, Unigene8615\_All, Unigene8621\_All, Unigene8700\_All, Unigene8770\_All, Unigene9014\_All, Unigene9059\_All, Unigene93\_All, Unigene9437\_All, Unigene9733\_All, Unigene9805\_All, Unigene9836\_All, Unigene9921\_All, Unigene9989\_All

|    |                                                   |                                                                                                                                                                                                                                                                                                                                                                                                                                                                                                                                                                                                                                                                                                                                                                                                                                                                                                                                                                                                                                                                                                                                                                                                                                                                                                                                                                                                                                                                                                                                                                                                                                                                                                                                                                                                                                                                                                                                                                                                                                                                                                                                                                                                                                                                                                                                                                                                                                                                                                                                                                                                                                                                                                                                                                                                                                                                                                                                                                                                                                                                                                                                                                                                                                                                                                                                                                                                                                                                                                                                                                                                      |
|----|---------------------------------------------------|------------------------------------------------------------------------------------------------------------------------------------------------------------------------------------------------------------------------------------------------------------------------------------------------------------------------------------------------------------------------------------------------------------------------------------------------------------------------------------------------------------------------------------------------------------------------------------------------------------------------------------------------------------------------------------------------------------------------------------------------------------------------------------------------------------------------------------------------------------------------------------------------------------------------------------------------------------------------------------------------------------------------------------------------------------------------------------------------------------------------------------------------------------------------------------------------------------------------------------------------------------------------------------------------------------------------------------------------------------------------------------------------------------------------------------------------------------------------------------------------------------------------------------------------------------------------------------------------------------------------------------------------------------------------------------------------------------------------------------------------------------------------------------------------------------------------------------------------------------------------------------------------------------------------------------------------------------------------------------------------------------------------------------------------------------------------------------------------------------------------------------------------------------------------------------------------------------------------------------------------------------------------------------------------------------------------------------------------------------------------------------------------------------------------------------------------------------------------------------------------------------------------------------------------------------------------------------------------------------------------------------------------------------------------------------------------------------------------------------------------------------------------------------------------------------------------------------------------------------------------------------------------------------------------------------------------------------------------------------------------------------------------------------------------------------------------------------------------------------------------------------------------------------------------------------------------------------------------------------------------------------------------------------------------------------------------------------------------------------------------------------------------------------------------------------------------------------------------------------------------------------------------------------------------------------------------------------------------------|
| 23 | <a href="#">Vibrio cholerae infection</a>         | <p>CL1062.Contig1_All, CL1079.Contig4_All, CL1116.Contig2_All, CL1355.Contig1_All, CL1370.Contig3_All, CL1452.Contig1_All, CL156.Contig1_All, CL156.Contig3_All, CL156.Contig4_All, CL1613.Contig1_All, CL1803.Contig1_All, CL2105.Contig1_All, CL2150.Contig3_All, CL2182.Contig1_All, CL2182.Contig3_All, CL2182.Contig4_All, CL2293.Contig1_All, CL2328.Contig1_All, CL2424.Contig3_All, CL2478.Contig2_All, CL2481.Contig1_All, CL2496.Contig1_All, CL2634.Contig1_All, CL2634.Contig2_All, CL2698.Contig2_All, CL2757.Contig2_All, CL2979.Contig1_All, CL3022.Contig2_All, CL3091.Contig1_All, CL3091.Contig2_All, CL3091.Contig3_All, CL3091.Contig4_All, CL3145.Contig2_All, CL3243.Contig1_All, CL3243.Contig2_All, CL3244.Contig1_All, CL3248.Contig2_All, CL326.Contig1_All, CL3442.Contig1_All, CL3487.Contig6_All, CL3690.Contig1_All, CL387.Contig2_All, CL3884.Contig2_All, CL39.Contig1_All, CL39.Contig2_All, CL39.Contig3_All, CL39.Contig4_All, CL3979.Contig1_All, CL3979.Contig2_All, CL4090.Contig2_All, CL4193.Contig1_All, CL4399.Contig3_All, CL440.Contig3_All, CL440.Contig5_All, CL440.Contig6_All, CL4459.Contig1_All, CL4491.Contig1_All, CL4666.Contig1_All, CL4666.Contig2_All, CL4879.Contig1_All, CL4891.Contig1_All, CL4891.Contig2_All, CL5034.Contig1_All, CL5034.Contig2_All, CL5280.Contig1_All, CL5391.Contig1_All, CL5391.Contig2_All, CL5468.Contig3_All, CL598.Contig1_All, CL598.Contig2_All, CL626.Contig1_All, CL626.Contig2_All, CL626.Contig3_All, CL626.Contig4_All, CL626.Contig6_All, CL847.Contig1_All, CL940.Contig3_All, CL940.Contig5_All, Unigene10026_All, Unigene10058_All, Unigene1024_All, Unigene1026_All, Unigene10433_All, Unigene10435_All, Unigene10483_All, Unigene11093_All, Unigene11094_All, Unigene11240_All, Unigene11539_All, Unigene11557_All, Unigene11578_All, Unigene11597_All, Unigene11598_All, Unigene11599_All, Unigene11880_All, Unigene11884_All, Unigene11899_All, Unigene1189_All, Unigene11908_All, Unigene12016_All, Unigene12017_All, Unigene12028_All, Unigene12168_All, Unigene12209_All, Unigene12275_All, Unigene12302_All, Unigene12315_All, Unigene12357_All, Unigene12423_All, Unigene125_All, Unigene12684_All, Unigene12793_All, Unigene12923_All, Unigene13092_All, Unigene1322_All, Unigene13324_All, Unigene13508_All, Unigene13589_All, Unigene1488_All, Unigene15320_All, Unigene15814_All, Unigene15815_All, Unigene15824_All, Unigene15969_All, Unigene16558_All, Unigene16580_All, Unigene16659_All, Unigene1704_All, Unigene17111_All, Unigene17327_All, Unigene1741_All, Unigene17596_All, Unigene17602_All, Unigene17727_All, Unigene17731_All, Unigene17798_All, Unigene18063_All, Unigene18598_All, Unigene18707_All, Unigene18898_All, Unigene19303_All, Unigene19360_All, Unigene20128_All, Unigene20912_All, Unigene2105_All, Unigene2250_All, Unigene2741_All, Unigene278_All, Unigene3069_All, Unigene3157_All, Unigene3207_All, Unigene3351_All, Unigene3391_All, Unigene3476_All, Unigene3730_All, Unigene3779_All, Unigene4112_All, Unigene4133_All, Unigene4305_All, Unigene4444_All, Unigene4532_All, Unigene5086_All, Unigene5233_All, Unigene5265_All, Unigene5589_All, Unigene5913_All, Unigene6009_All, Unigene6050_All, Unigene6098_All, Unigene6145_All, Unigene6305_All, Unigene6326_All, Unigene646_All, Unigene6478_All, Unigene65_All, Unigene6741_All, Unigene7284_All, Unigene7723_All, Unigene8109_All, Unigene8208_All, Unigene8627_All, Unigene9040_All, Unigene9161_All, Unigene925_All, Unigene9271_All, Unigene9513_All, Unigene955_All, Unigene9733_All</p> |
| 24 | <a href="#">Ribosome biogenesis in eukaryotes</a> | <p>CL1554.Contig2_All, CL1699.Contig4_All, CL1714.Contig4_All, CL1725.Contig1_All, CL1725.Contig2_All, CL1904.Contig1_All, CL1904.Contig2_All, CL2077.Contig2_All, CL2077.Contig3_All, CL2077.Contig4_All, CL2112.Contig7_All, CL2144.Contig1_All, CL2144.Contig2_All, CL2248.Contig2_All, CL2285.Contig1_All, CL2285.Contig2_All, CL2671.Contig2_All, CL2765.Contig1_All, CL2765.Contig2_All, CL2827.Contig4_All, CL2838.Contig1_All, CL2838.Contig2_All, CL2838.Contig4_All, CL2933.Contig1_All, CL2933.Contig2_All, CL2933.Contig3_All, CL2984.Contig1_All, CL2986.Contig1_All, CL2986.Contig2_All, CL3332.Contig2_All, CL3668.Contig1_All, CL3668.Contig2_All, CL3705.Contig1_All, CL3705.Contig2_All, CL3738.Contig1_All, CL3776.Contig2_All, CL3776.Contig3_All, CL3776.Contig4_All, CL378.Contig1_All, CL3838.Contig1_All, CL3838.Contig2_All, CL4160.Contig1_All, CL4394.Contig2_All, CL446.Contig2_All, CL4633.Contig1_All, CL4633.Contig2_All, CL4775.Contig1_All, CL4775.Contig2_All, CL4874.Contig1_All, CL5437.Contig1_All, CL5437.Contig2_All, CL560.Contig1_All, CL560.Contig2_All, CL560.Contig4_All, CL563.Contig1_All, CL563.Contig2_All, CL563.Contig4_All, CL775.Contig1_All, CL775.Contig2_All, CL830.Contig3_All, CL916.Contig2_All, Unigene10143_All, Unigene10144_All, Unigene101_All, Unigene10307_All, Unigene10598_All, Unigene10619_All, Unigene1065_All, Unigene10851_All, Unigene10859_All, Unigene11044_All, Unigene11145_All, Unigene11169_All, Unigene11170_All, Unigene11523_All, Unigene11791_All, Unigene11827_All, Unigene12010_All, Unigene12249_All, Unigene12265_All, Unigene12410_All, Unigene12440_All, Unigene12562_All, Unigene12586_All, Unigene12591_All, Unigene12608_All, Unigene12695_All, Unigene12706_All, Unigene12780_All, Unigene12806_All, Unigene13060_All, Unigene13125_All, Unigene13134_All, Unigene13201_All, Unigene13387_All, Unigene13541_All, Unigene13562_All, Unigene13904_All, Unigene14012_All, Unigene16235_All, Unigene165_All, Unigene16_All, Unigene1752_All, Unigene18186_All, Unigene18319_All, Unigene18714_All, Unigene1957_All, Unigene20319_All, Unigene2116_All, Unigene2552_All, Unigene2867_All, Unigene2931_All, Unigene3016_All, Unigene3299_All, Unigene3415_All, Unigene3634_All, Unigene4157_All, Unigene4180_All, Unigene4432_All, Unigene4683_All, Unigene4786_All, Unigene4846_All, Unigene5224_All, Unigene5362_All, Unigene5650_All, Unigene6183_All, Unigene6525_All, Unigene6776_All, Unigene6999_All, Unigene7148_All, Unigene7200_All, Unigene7245_All, Unigene7679_All, Unigene780_All, Unigene783_All, Unigene829_All, Unigene8499_All, Unigene9030_All, Unigene9259_All, Unigene9362_All, Unigene9829_All</p>                                                                                                                                                                                                                                                                                                                                                                                                                                                                                                                                                                                                                                                                                                                                                                                                                                                                                      |

|    |                                                    |                                                                                                                                                                                                                                                                                                                                                                                                                                                                                                                                                                                                                                                                                                                                                                                                                                                                                                                                                                                                                                                                                                                                                                                                                                                                                                                                                                                                                                                                                                                                                                                                                                                                                                                                                                                                                                                                                                                                                                                                                                                                                                                                                                                                                                                                                                                                                                                                                                                                                                                                                                                                                                                                                                                                                                                                                                                                                                                                                                                                                                                                                                                                                                                                                                                                                                                                                                                                                                                                                                                                                                                                                                                                                                                                                                                                                                                                                                                                                                                                                                                                                                                                                                                                                                                                                                                                                                                                                                                                                                                                                                                                                                                                                                                                                                                                                                                                                                                                                                                                                                                                                                                                                                                                                                                                                                                                                                                                                                                                                                                                                                                                                                                                                                                                                                                                                                                                                                                                                                                                                                                                                                                                                                                                                                                                                                                                                                                  |
|----|----------------------------------------------------|----------------------------------------------------------------------------------------------------------------------------------------------------------------------------------------------------------------------------------------------------------------------------------------------------------------------------------------------------------------------------------------------------------------------------------------------------------------------------------------------------------------------------------------------------------------------------------------------------------------------------------------------------------------------------------------------------------------------------------------------------------------------------------------------------------------------------------------------------------------------------------------------------------------------------------------------------------------------------------------------------------------------------------------------------------------------------------------------------------------------------------------------------------------------------------------------------------------------------------------------------------------------------------------------------------------------------------------------------------------------------------------------------------------------------------------------------------------------------------------------------------------------------------------------------------------------------------------------------------------------------------------------------------------------------------------------------------------------------------------------------------------------------------------------------------------------------------------------------------------------------------------------------------------------------------------------------------------------------------------------------------------------------------------------------------------------------------------------------------------------------------------------------------------------------------------------------------------------------------------------------------------------------------------------------------------------------------------------------------------------------------------------------------------------------------------------------------------------------------------------------------------------------------------------------------------------------------------------------------------------------------------------------------------------------------------------------------------------------------------------------------------------------------------------------------------------------------------------------------------------------------------------------------------------------------------------------------------------------------------------------------------------------------------------------------------------------------------------------------------------------------------------------------------------------------------------------------------------------------------------------------------------------------------------------------------------------------------------------------------------------------------------------------------------------------------------------------------------------------------------------------------------------------------------------------------------------------------------------------------------------------------------------------------------------------------------------------------------------------------------------------------------------------------------------------------------------------------------------------------------------------------------------------------------------------------------------------------------------------------------------------------------------------------------------------------------------------------------------------------------------------------------------------------------------------------------------------------------------------------------------------------------------------------------------------------------------------------------------------------------------------------------------------------------------------------------------------------------------------------------------------------------------------------------------------------------------------------------------------------------------------------------------------------------------------------------------------------------------------------------------------------------------------------------------------------------------------------------------------------------------------------------------------------------------------------------------------------------------------------------------------------------------------------------------------------------------------------------------------------------------------------------------------------------------------------------------------------------------------------------------------------------------------------------------------------------------------------------------------------------------------------------------------------------------------------------------------------------------------------------------------------------------------------------------------------------------------------------------------------------------------------------------------------------------------------------------------------------------------------------------------------------------------------------------------------------------------------------------------------------------------------------------------------------------------------------------------------------------------------------------------------------------------------------------------------------------------------------------------------------------------------------------------------------------------------------------------------------------------------------------------------------------------------------------------------------------------------------------------------------------------|
| 25 | <a href="#">Vascular smooth muscle contraction</a> | <p>CL1068.Contig5_All, CL1075.Contig3_All, CL1141.Contig2_All, CL126.Contig2_All, CL1286.Contig2_All, CL1452.Contig1_All, CL147.Contig6_All, CL1525.Contig15_All, CL1525.Contig9_All, CL1559.Contig1_All, CL1563.Contig2_All, CL1687.Contig4_All, CL1823.Contig8_All, CL187.Contig3_All, CL191.Contig1_All, CL191.Contig2_All, CL1920.Contig1_All, CL1920.Contig2_All, CL1987.Contig1_All, CL199.Contig1_All, CL2039.Contig1_All, CL2061.Contig1_All, CL2131.Contig4_All, CL2131.Contig5_All, CL2131.Contig6_All, CL2131.Contig8_All, CL2182.Contig1_All, CL2182.Contig3_All, CL2182.Contig4_All, CL2224.Contig2_All, CL2224.Contig3_All, CL2224.Contig4_All, CL2265.Contig1_All, CL2265.Contig2_All, CL2432.Contig2_All, CL244.Contig2_All, CL2468.Contig1_All, CL2468.Contig2_All, CL2762.Contig4_All, CL2904.Contig1_All, CL2904.Contig2_All, CL2930.Contig5_All, CL296.Contig16_All, CL3011.Contig1_All, CL3046.Contig1_All, CL3047.Contig1_All, CL3047.Contig2_All, CL305.Contig2_All, CL3092.Contig1_All, CL3092.Contig2_All, CL3224.Contig1_All, CL3260.Contig1_All, CL3260.Contig2_All, CL3260.Contig3_All, CL3260.Contig4_All, CL3260.Contig5_All, CL3260.Contig7_All, CL3294.Contig1_All, CL3295.Contig1_All, CL3297.Contig1_All, CL3297.Contig2_All, CL3311.Contig1_All, CL3311.Contig2_All, CL3347.Contig1_All, CL3347.Contig2_All, CL3500.Contig1_All, CL3525.Contig1_All, CL3525.Contig2_All, CL3543.Contig2_All, CL3543.Contig3_All, CL3543.Contig4_All, CL3667.Contig1_All, CL3667.Contig2_All, CL3667.Contig3_All, CL3672.Contig4_All, CL3689.Contig2_All, CL3761.Contig1_All, CL3823.Contig1_All, CL3823.Contig2_All, CL39.Contig1_All, CL39.Contig2_All, CL39.Contig3_All, CL39.Contig4_All, CL392.Contig1_All, CL392.Contig2_All, CL392.Contig3_All, CL4002.Contig1_All, CL4004.Contig1_All, CL4004.Contig2_All, CL4005.Contig2_All, CL4005.Contig3_All, CL4014.Contig1_All, CL4180.Contig3_All, CL4181.Contig1_All, CL4181.Contig4_All, CL4187.Contig1_All, CL4216.Contig1_All, CL4216.Contig2_All, CL4250.Contig2_All, CL4262.Contig2_All, CL4340.Contig1_All, CL4362.Contig1_All, CL4362.Contig2_All, CL4395.Contig1_All, CL440.Contig3_All, CL440.Contig5_All, CL440.Contig6_All, CL4402.Contig1_All, CL4442.Contig1_All, CL4454.Contig3_All, CL4509.Contig1_All, CL4509.Contig2_All, CL4596.Contig1_All, CL4637.Contig1_All, CL467.Contig2_All, CL4787.Contig1_All, CL4855.Contig1_All, CL4855.Contig2_All, CL4862.Contig1_All, CL4904.Contig1_All, CL503.Contig2_All, CL503.Contig3_All, CL503.Contig4_All, CL503.Contig5_All, CL503.Contig6_All, CL503.Contig8_All, CL5061.Contig2_All, CL52.Contig17_All, CL52.Contig28_All, CL52.Contig35_All, CL52.Contig3_All, CL52.Contig41_All, CL523.Contig1_All, CL523.Contig2_All, CL5246.Contig3_All, CL5310.Contig2_All, CL5391.Contig1_All, CL5391.Contig2_All, CL5399.Contig1_All, CL5399.Contig2_All, CL5458.Contig7_All, CL571.Contig2_All, CL573.Contig1_All, CL644.Contig1_All, CL648.Contig2_All, CL691.Contig1_All, CL741.Contig2_All, CL772.Contig1_All, CL772.Contig2_All, CL787.Contig5_All, CL860.Contig10_All, CL860.Contig8_All, CL860.Contig9_All, CL916.Contig2_All, CL923.Contig1_All, CL923.Contig2_All, CL923.Contig3_All, CL940.Contig3_All, CL940.Contig5_All, CL970.Contig2_All, Unigene10006_All, Unigene10058_All, Unigene10201_All, Unigene10202_All, Unigene10574_All, Unigene10682_All, Unigene10777_All, Unigene11054_All, Unigene11289_All, Unigene11298_All, Unigene11300_All, Unigene11307_All, Unigene1131_All, Unigene1137_All, Unigene1168_All, Unigene11730_All, Unigene11935_All, Unigene12315_All, Unigene12418_All, Unigene1257_All, Unigene12658_All, Unigene12697_All, Unigene12719_All, Unigene12828_All, Unigene1512_All, Unigene15176_All, Unigene15271_All, Unigene16033_All, Unigene16098_All, Unigene1633_All, Unigene16435_All, Unigene16510_All, Unigene16716_All, Unigene1671_All, Unigene16769_All, Unigene16860_All, Unigene16874_All, Unigene16976_All, Unigene16994_All, Unigene1705_All, Unigene17117_All, Unigene17301_All, Unigene17362_All, Unigene17488_All, Unigene17773_All, Unigene1777_All, Unigene17815_All, Unigene17824_All, Unigene18006_All, Unigene18037_All, Unigene18106_All, Unigene18178_All, Unigene18200_All, Unigene18215_All, Unigene18276_All, Unigene18317_All, Unigene18378_All, Unigene18644_All, Unigene18645_All, Unigene18898_All, Unigene18993_All, Unigene19289_All, Unigene19364_All, Unigene1941_All, Unigene19453_All, Unigene19647_All, Unigene19745_All, Unigene1974_All, Unigene20065_All, Unigene20111_All, Unigene2015_All, Unigene2019_All, Unigene20299_All, Unigene2029_All, Unigene2032_All, Unigene2052_All, Unigene20530_All, Unigene2053_All, Unigene2058_All, Unigene20625_All, Unigene21008_All, Unigene210_All, Unigene2145_All, Unigene214_All, Unigene217_All, Unigene2209_All, Unigene2233_All, Unigene237_All, Unigene24_All, Unigene2514_All, Unigene2519_All, Unigene2795_All, Unigene2817_All, Unigene3029_All, Unigene3033_All, Unigene3034_All, Unigene3036_All, Unigene3037_All, Unigene3042_All, Unigene3328_All, Unigene3471_All, Unigene3659_All, Unigene3696_All, Unigene3779_All, Unigene3861_All, Unigene3996_All, Unigene4013_All, Unigene4022_All, Unigene4053_All, Unigene4070_All, Unigene4112_All, Unigene4161_All, Unigene4221_All, Unigene4269_All, Unigene4532_All, Unigene4692_All, Unigene4783_All, Unigene4920_All, Unigene4935_All, Unigene4970_All, Unigene500_All, Unigene5035_All, Unigene5088_All, Unigene5675_All, Unigene5808_All, Unigene5821_All, Unigene5993_All, Unigene5994_All, Unigene6013_All, Unigene6015_All, Unigene6037_All, Unigene6059_All, Unigene6073_All, Unigene6273_All, Unigene6459_All, Unigene6525_All, Unigene6655_All, Unigene6896_All, Unigene6907_All, Unigene7063_All, Unigene7129_All, Unigene7183_All, Unigene7217_All, Unigene7704_All, Unigene7759_All, Unigene7829_All, Unigene7854_All, Unigene785_All, Unigene7993_All, Unigene8009_All, Unigene8017_All, Unigene8056_All, Unigene8160_All, Unigene8210_All, Unigene8422_All, Unigene8558_All, Unigene8615_All, Unigene8621_All, Unigene8747_All, Unigene9014_All, Unigene9039_All, Unigene9050_All, Unigene9059_All, Unigene9076_All, Unigene9222_All, Unigene93_All, Unigene9437_All, Unigene9722_All, Unigene9733_All, Unigene9836_All, Unigene9877_All, Unigene9904_All</p> |
| 26 | <a href="#">African trypanosomiasis</a>            | <p>CL2182.Contig1_All, CL2182.Contig3_All, CL2182.Contig4_All, CL2930.Contig5_All, CL39.Contig1_All, CL39.Contig2_All, CL39.Contig3_All, CL39.Contig4_All, CL5391.Contig1_All, CL5391.Contig2_All, CL5399.Contig1_All, CL5399.Contig2_All, CL940.Contig3_All, CL940.Contig5_All, Unigene10999_All, Unigene11371_All, Unigene18898_All, Unigene2209_All, Unigene4053_All, Unigene4070_All, Unigene8422_All, Unigene9437_All</p>                                                                                                                                                                                                                                                                                                                                                                                                                                                                                                                                                                                                                                                                                                                                                                                                                                                                                                                                                                                                                                                                                                                                                                                                                                                                                                                                                                                                                                                                                                                                                                                                                                                                                                                                                                                                                                                                                                                                                                                                                                                                                                                                                                                                                                                                                                                                                                                                                                                                                                                                                                                                                                                                                                                                                                                                                                                                                                                                                                                                                                                                                                                                                                                                                                                                                                                                                                                                                                                                                                                                                                                                                                                                                                                                                                                                                                                                                                                                                                                                                                                                                                                                                                                                                                                                                                                                                                                                                                                                                                                                                                                                                                                                                                                                                                                                                                                                                                                                                                                                                                                                                                                                                                                                                                                                                                                                                                                                                                                                                                                                                                                                                                                                                                                                                                                                                                                                                                                                                   |

|    |                                             |                                                                                                                                                                                                                                                                                                                                                                                                                                                                                                                                                                                                                                                                                                                                                                                                                                                                                                                                                                                                                                                                                                                                                                                                                                                                                                                                                                                                                                                                                                                                                                                                                                                                                                                                                                                                                                                                                                                                                                                                                                                                                                                                                                                                                                                                                                                                                                                                                                                                                                                                                                                          |
|----|---------------------------------------------|------------------------------------------------------------------------------------------------------------------------------------------------------------------------------------------------------------------------------------------------------------------------------------------------------------------------------------------------------------------------------------------------------------------------------------------------------------------------------------------------------------------------------------------------------------------------------------------------------------------------------------------------------------------------------------------------------------------------------------------------------------------------------------------------------------------------------------------------------------------------------------------------------------------------------------------------------------------------------------------------------------------------------------------------------------------------------------------------------------------------------------------------------------------------------------------------------------------------------------------------------------------------------------------------------------------------------------------------------------------------------------------------------------------------------------------------------------------------------------------------------------------------------------------------------------------------------------------------------------------------------------------------------------------------------------------------------------------------------------------------------------------------------------------------------------------------------------------------------------------------------------------------------------------------------------------------------------------------------------------------------------------------------------------------------------------------------------------------------------------------------------------------------------------------------------------------------------------------------------------------------------------------------------------------------------------------------------------------------------------------------------------------------------------------------------------------------------------------------------------------------------------------------------------------------------------------------------------|
| 27 | <a href="#">GnRH signaling pathway</a>      | <p>CL1085.Contig2_All, CL1286.Contig2_All, CL1452.Contig1_All, CL1548.Contig2_All, CL1548.Contig3_All, CL1807.Contig1_All, CL1807.Contig2_All, CL1823.Contig8_All, CL1966.Contig2_All, CL199.Contig1_All, CL2129.Contig4_All, CL2131.Contig4_All, CL2131.Contig5_All, CL2131.Contig6_All, CL2131.Contig8_All, CL2182.Contig1_All, CL2182.Contig3_All, CL2182.Contig4_All, CL2432.Contig2_All, CL2468.Contig1_All, CL2468.Contig2_All, CL271.Contig2_All, CL2930.Contig5_All, CL3007.Contig2_All, CL3047.Contig1_All, CL3047.Contig2_All, CL3667.Contig1_All, CL3667.Contig2_All, CL3667.Contig3_All, CL39.Contig1_All, CL39.Contig2_All, CL39.Contig3_All, CL39.Contig4_All, CL398.Contig4_All, CL400.Contig1_All, CL400.Contig2_All, CL4005.Contig2_All, CL4005.Contig3_All, CL4262.Contig2_All, CL4395.Contig1_All, CL44.Contig10_All, CL44.Contig12_All, CL44.Contig13_All, CL44.Contig16_All, CL44.Contig17_All, CL44.Contig18_All, CL44.Contig19_All, CL44.Contig1_All, CL44.Contig22_All, CL44.Contig23_All, CL44.Contig2_All, CL44.Contig3_All, CL44.Contig4_All, CL44.Contig5_All, CL44.Contig6_All, CL44.Contig8_All, CL44.Contig9_All, CL440.Contig3_All, CL440.Contig5_All, CL440.Contig6_All, CL4439.Contig2_All, CL4509.Contig1_All, CL4509.Contig2_All, CL4736.Contig1_All, CL4736.Contig2_All, CL4787.Contig1_All, CL4815.Contig1_All, CL4815.Contig2_All, CL4855.Contig1_All, CL4855.Contig2_All, CL4966.Contig1_All, CL5115.Contig1_All, CL5310.Contig2_All, CL5391.Contig1_All, CL5391.Contig2_All, CL5399.Contig1_All, CL5399.Contig2_All, CL5458.Contig5_All, CL5458.Contig7_All, CL691.Contig1_All, CL772.Contig1_All, CL772.Contig2_All, CL860.Contig10_All, CL860.Contig8_All, CL860.Contig9_All, CL940.Contig3_All, CL940.Contig5_All, Unigene10006_All, Unigene10058_All, Unigene10174_All, Unigene10574_All, Unigene11054_All, Unigene12139_All, Unigene12315_All, Unigene12671_All, Unigene12719_All, Unigene1326_All, Unigene1479_All, Unigene16769_All, Unigene18898_All, Unigene18993_All, Unigene2029_All, Unigene2032_All, Unigene2209_All, Unigene220_All, Unigene3029_All, Unigene3033_All, Unigene3034_All, Unigene3036_All, Unigene3037_All, Unigene3042_All, Unigene3779_All, Unigene3996_All, Unigene4013_All, Unigene4053_All, Unigene4070_All, Unigene4112_All, Unigene4532_All, Unigene5675_All, Unigene6101_All, Unigene6977_All, Unigene6999_All, Unigene7018_All, Unigene7265_All, Unigene8046_All, Unigene8056_All, Unigene8205_All, Unigene8422_All, Unigene8621_All, Unigene9028_All, Unigene93_All, Unigene9437_All, Unigene9733_All</p> |
| 28 | <a href="#">Aminoacyl-tRNA biosynthesis</a> | <p>CL1571.Contig2_All, CL1585.Contig5_All, CL1585.Contig6_All, CL1834.Contig1_All, CL2038.Contig1_All, CL2038.Contig7_All, CL2539.Contig1_All, CL2539.Contig2_All, CL289.Contig1_All, CL289.Contig3_All, CL2898.Contig1_All, CL2898.Contig2_All, CL2898.Contig3_All, CL3381.Contig1_All, CL3381.Contig2_All, CL3381.Contig3_All, CL3381.Contig4_All, CL4424.Contig1_All, CL4424.Contig2_All, CL4424.Contig3_All, CL4424.Contig4_All, CL5013.Contig3_All, CL5013.Contig4_All, CL505.Contig1_All, CL505.Contig2_All, CL628.Contig1_All, Unigene10131_All, Unigene10150_All, Unigene10151_All, Unigene10351_All, Unigene10425_All, Unigene10554_All, Unigene11234_All, Unigene11235_All, Unigene11236_All, Unigene11954_All, Unigene12290_All, Unigene12355_All, Unigene12439_All, Unigene12756_All, Unigene12924_All, Unigene1293_All, Unigene13310_All, Unigene13437_All, Unigene13506_All, Unigene14161_All, Unigene1513_All, Unigene15573_All, Unigene1779_All, Unigene1811_All, Unigene2410_All, Unigene3180_All, Unigene3188_All, Unigene3254_All, Unigene3387_All, Unigene4045_All, Unigene4904_All, Unigene5382_All, Unigene5984_All, Unigene6127_All, Unigene6205_All, Unigene6228_All, Unigene6787_All, Unigene6944_All, Unigene739_All, Unigene8039_All, Unigene8198_All, Unigene8652_All, Unigene9092_All, Unigene9219_All, Unigene9653_All, Unigene9662_All, Unigene9741_All, Unigene9791_All</p>                                                                                                                                                                                                                                                                                                                                                                                                                                                                                                                                                                                                                                                                                                                                                                                                                                                                                                                                                                                                                                                                                                                                                                              |
| 29 | <a href="#">Cholinergic synapse</a>         | <p>CL1066.Contig1_All, CL1066.Contig2_All, CL1066.Contig3_All, CL1452.Contig1_All, CL1675.Contig2_All, CL2182.Contig1_All, CL2182.Contig3_All, CL2182.Contig4_All, CL2450.Contig1_All, CL2450.Contig2_All, CL257.Contig1_All, CL257.Contig2_All, CL2930.Contig5_All, CL367.Contig1_All, CL367.Contig2_All, CL367.Contig3_All, CL39.Contig1_All, CL39.Contig2_All, CL39.Contig3_All, CL39.Contig4_All, CL3920.Contig2_All, CL4005.Contig2_All, CL4005.Contig3_All, CL4037.Contig1_All, CL4197.Contig1_All, CL4197.Contig2_All, CL4262.Contig2_All, CL44.Contig10_All, CL44.Contig12_All, CL44.Contig13_All, CL44.Contig16_All, CL44.Contig17_All, CL44.Contig18_All, CL44.Contig19_All, CL44.Contig1_All, CL44.Contig22_All, CL44.Contig23_All, CL44.Contig2_All, CL44.Contig3_All, CL44.Contig4_All, CL44.Contig5_All, CL44.Contig6_All, CL44.Contig8_All, CL44.Contig9_All, CL440.Contig3_All, CL440.Contig5_All, CL440.Contig6_All, CL4439.Contig2_All, CL4787.Contig1_All, CL4923.Contig2_All, CL5122.Contig1_All, CL5122.Contig2_All, CL5125.Contig1_All, CL5391.Contig1_All, CL5391.Contig2_All, CL5399.Contig1_All, CL5399.Contig2_All, CL5441.Contig3_All, CL600.Contig1_All, CL600.Contig2_All, CL600.Contig3_All, CL600.Contig4_All, CL600.Contig6_All, CL691.Contig1_All, CL695.Contig16_All, CL940.Contig3_All, CL940.Contig5_All, Unigene12110_All, Unigene12671_All, Unigene15194_All, Unigene15195_All, Unigene16561_All, Unigene17025_All, Unigene1743_All, Unigene176_All, Unigene17968_All, Unigene18199_All, Unigene18898_All, Unigene18993_All, Unigene1925_All, Unigene2029_All, Unigene2032_All, Unigene2141_All, Unigene2196_All, Unigene2209_All, Unigene2749_All, Unigene2760_All, Unigene3357_All, Unigene3779_All, Unigene4053_All, Unigene4070_All, Unigene4096_All, Unigene4112_All, Unigene4126_All, Unigene4780_All, Unigene5521_All, Unigene6217_All, Unigene69_All, Unigene7023_All, Unigene7042_All, Unigene8422_All, Unigene8621_All, Unigene8643_All, Unigene8727_All, Unigene8770_All, Unigene93_All, Unigene9437_All, Unigene9644_All, Unigene9733_All</p>                                                                                                                                                                                                                                                                                                                                                                                                                                                                                          |



|    |                                                     |                                                                                                                                                                                                                                                                                                                                                                                                                                                                                                                                                                                                                                                                                                                                                                                                                                                                                                                                                                                                                                                                                                                                                                                                                                                                                                                                                                                                                                                                                                                                                                                                                                                                                                                                                                                                                                                                                                                                                                                                                                                                                                                                                                                                                                                                                                                                                                                                                                                                                                                                                                                                                                                                                                                                                                                                                                                                                                                                                                                                                                                                                                     |
|----|-----------------------------------------------------|-----------------------------------------------------------------------------------------------------------------------------------------------------------------------------------------------------------------------------------------------------------------------------------------------------------------------------------------------------------------------------------------------------------------------------------------------------------------------------------------------------------------------------------------------------------------------------------------------------------------------------------------------------------------------------------------------------------------------------------------------------------------------------------------------------------------------------------------------------------------------------------------------------------------------------------------------------------------------------------------------------------------------------------------------------------------------------------------------------------------------------------------------------------------------------------------------------------------------------------------------------------------------------------------------------------------------------------------------------------------------------------------------------------------------------------------------------------------------------------------------------------------------------------------------------------------------------------------------------------------------------------------------------------------------------------------------------------------------------------------------------------------------------------------------------------------------------------------------------------------------------------------------------------------------------------------------------------------------------------------------------------------------------------------------------------------------------------------------------------------------------------------------------------------------------------------------------------------------------------------------------------------------------------------------------------------------------------------------------------------------------------------------------------------------------------------------------------------------------------------------------------------------------------------------------------------------------------------------------------------------------------------------------------------------------------------------------------------------------------------------------------------------------------------------------------------------------------------------------------------------------------------------------------------------------------------------------------------------------------------------------------------------------------------------------------------------------------------------------|
| 30 | <a href="#">Chemokine signaling pathway</a>         | <p>CL1066.Contig1_All, CL1066.Contig2_All, CL1066.Contig3_All, CL1104.Contig1_All, CL1104.Contig2_All, CL1104.Contig3_All, CL1104.Contig4_All, CL1104.Contig5_All, CL1104.Contig6_All, CL1104.Contig7_All, CL1104.Contig8_All, CL1104.Contig9_All, CL1452.Contig1_All, CL1535.Contig3_All, CL1546.Contig1_All, CL1546.Contig3_All, CL1546.Contig4_All, CL1546.Contig5_All, CL1546.Contig6_All, CL1546.Contig7_All, CL1546.Contig8_All, CL1675.Contig2_All, CL1723.Contig1_All, CL1723.Contig2_All, CL1723.Contig7_All, CL1807.Contig1_All, CL1807.Contig2_All, CL1843.Contig3_All, CL1874.Contig2_All, CL1954.Contig1_All, CL1954.Contig2_All, CL2038.Contig1_All, CL2038.Contig7_All, CL2066.Contig1_All, CL2182.Contig1_All, CL2182.Contig3_All, CL2182.Contig4_All, CL2224.Contig2_All, CL2224.Contig3_All, CL2224.Contig4_All, CL2375.Contig2_All, CL2642.Contig1_All, CL2642.Contig2_All, CL271.Contig2_All, CL2930.Contig5_All, CL2975.Contig2_All, CL2992.Contig1_All, CL3027.Contig3_All, CL3047.Contig1_All, CL3047.Contig2_All, CL3116.Contig2_All, CL3632.Contig2_All, CL3632.Contig3_All, CL367.Contig1_All, CL367.Contig2_All, CL367.Contig3_All, CL3823.Contig1_All, CL3823.Contig2_All, CL39.Contig1_All, CL39.Contig2_All, CL39.Contig3_All, CL39.Contig4_All, CL4005.Contig2_All, CL4005.Contig3_All, CL4040.Contig1_All, CL4088.Contig2_All, CL4130.Contig1_All, CL4158.Contig4_All, CL4158.Contig5_All, CL4158.Contig7_All, CL4262.Contig2_All, CL440.Contig3_All, CL440.Contig5_All, CL440.Contig6_All, CL4439.Contig2_All, CL4559.Contig2_All, CL4559.Contig3_All, CL4787.Contig1_All, CL4855.Contig1_All, CL4855.Contig2_All, CL5361.Contig2_All, CL5361.Contig4_All, CL5391.Contig1_All, CL5391.Contig2_All, CL5469.Contig2_All, CL622.Contig1_All, CL622.Contig2_All, CL622.Contig4_All, CL695.Contig16_All, CL748.Contig1_All, CL748.Contig3_All, CL940.Contig3_All, CL940.Contig5_All, Unigene10097_All, Unigene10174_All, Unigene10998_All, Unigene11082_All, Unigene11307_All, Unigene11459_All, Unigene11521_All, Unigene11922_All, Unigene12110_All, Unigene12201_All, Unigene12603_All, Unigene12671_All, Unigene13036_All, Unigene1447_All, Unigene16840_All, Unigene16963_All, Unigene1757_All, Unigene1855_All, Unigene18644_All, Unigene18898_All, Unigene1925_All, Unigene19601_All, Unigene20226_All, Unigene2029_All, Unigene2110_All, Unigene236_All, Unigene247_All, Unigene2749_All, Unigene3088_All, Unigene3168_All, Unigene3779_All, Unigene3967_All, Unigene4053_All, Unigene4070_All, Unigene4112_All, Unigene4780_All, Unigene5303_All, Unigene5521_All, Unigene555_All, Unigene5808_All, Unigene5813_All, Unigene5873_All, Unigene6014_All, Unigene6029_All, Unigene6217_All, Unigene7016_All, Unigene7058_All, Unigene7063_All, Unigene7297_All, Unigene7547_All, Unigene8046_All, Unigene8056_All, Unigene8184_All, Unigene8422_All, Unigene8747_All, Unigene8784_All, Unigene9050_All, Unigene9379_All, Unigene93_All, Unigene9719_All, Unigene9730_All, Unigene9733_All, Unigene9785_All, Unigene9787_All, Unigene9877_All, Unigene9902_All</p> |
| 31 | <a href="#">Antigen processing and presentation</a> | <p>CL105.Contig1_All, CL105.Contig2_All, CL105.Contig3_All, CL1054.Contig1_All, CL1054.Contig2_All, CL1280.Contig1_All, CL1280.Contig2_All, CL1358.Contig1_All, CL1358.Contig2_All, CL1358.Contig3_All, CL1774.Contig2_All, CL1776.Contig1_All, CL1925.Contig1_All, CL2165.Contig2_All, CL2362.Contig1_All, CL2362.Contig2_All, CL2686.Contig1_All, CL2686.Contig2_All, CL3302.Contig2_All, CL3706.Contig1_All, CL3742.Contig1_All, CL3920.Contig2_All, CL4057.Contig1_All, CL4247.Contig2_All, CL4247.Contig3_All, CL4576.Contig1_All, CL4633.Contig1_All, CL4633.Contig2_All, CL5043.Contig1_All, CL5043.Contig2_All, CL5135.Contig1_All, CL5135.Contig2_All, CL5256.Contig1_All, CL5256.Contig2_All, CL5256.Contig4_All, CL558.Contig1_All, CL558.Contig2_All, CL558.Contig4_All, CL702.Contig2_All, CL702.Contig3_All, CL785.Contig1_All, Unigene10162_All, Unigene10296_All, Unigene10374_All, Unigene10837_All, Unigene10977_All, Unigene11000_All, Unigene11053_All, Unigene11166_All, Unigene11241_All, Unigene11282_All, Unigene11360_All, Unigene11361_All, Unigene11845_All, Unigene11876_All, Unigene11879_All, Unigene12091_All, Unigene12393_All, Unigene12508_All, Unigene12713_All, Unigene12890_All, Unigene13331_All, Unigene15263_All, Unigene15265_All, Unigene15587_All, Unigene15863_All, Unigene16093_All, Unigene16098_All, Unigene16499_All, Unigene17470_All, Unigene17781_All, Unigene18095_All, Unigene18114_All, Unigene18195_All, Unigene18535_All, Unigene1922_All, Unigene20260_All, Unigene2074_All, Unigene2121_All, Unigene22023_All, Unigene2270_All, Unigene2961_All, Unigene2982_All, Unigene3830_All, Unigene4155_All, Unigene44_All, Unigene4921_All, Unigene5187_All, Unigene5923_All, Unigene5935_All, Unigene6915_All, Unigene860_All, Unigene8850_All, Unigene9141_All, Unigene9438_All, Unigene962_All, Unigene9928_All, Unigene9971_All</p>                                                                                                                                                                                                                                                                                                                                                                                                                                                                                                                                                                                                                                                                                                                                                                                                                                                                                                                                                                                                                                                                                                                                                                                                           |

32

[RNA transport](#)

CL1046.Contig1\_All, CL1046.Contig2\_All, CL1046.Contig3\_All, CL1401.Contig1\_All, CL1477.Contig8\_All, CL1637.Contig1\_All, CL1818.Contig1\_All, CL1818.Contig2\_All, CL1818.Contig4\_All, CL1818.Contig5\_All, CL1818.Contig6\_All, CL1850.Contig1\_All, CL1850.Contig2\_All, CL1867.Contig1\_All, CL1867.Contig2\_All, CL1927.Contig2\_All, CL2144.Contig1\_All, CL2144.Contig2\_All, CL2154.Contig1\_All, CL2154.Contig2\_All, CL2187.Contig2\_All, CL2229.Contig1\_All, CL2244.Contig2\_All, CL2278.Contig1\_All, CL2278.Contig2\_All, CL2496.Contig1\_All, CL2502.Contig2\_All, CL2502.Contig3\_All, CL2719.Contig1\_All, CL2719.Contig2\_All, CL2765.Contig1\_All, CL2765.Contig2\_All, CL2827.Contig4\_All, CL2959.Contig2\_All, CL296.Contig4\_All, CL297.Contig1\_All, CL3057.Contig1\_All, CL3057.Contig2\_All, CL3139.Contig1\_All, CL3186.Contig5\_All, CL3221.Contig1\_All, CL3221.Contig2\_All, CL3224.Contig1\_All, CL3270.Contig1\_All, CL3270.Contig2\_All, CL3278.Contig1\_All, CL3401.Contig2\_All, CL3444.Contig2\_All, CL3444.Contig3\_All, CL3616.Contig1\_All, CL3635.Contig2\_All, CL3725.Contig2\_All, CL3811.Contig1\_All, CL3811.Contig2\_All, CL3811.Contig3\_All, CL3811.Contig4\_All, CL3837.Contig1\_All, CL3837.Contig2\_All, CL4101.Contig1\_All, CL4134.Contig1\_All, CL4155.Contig1\_All, CL4234.Contig2\_All, CL4298.Contig3\_All, CL4298.Contig4\_All, CL4321.Contig1\_All, CL4331.Contig1\_All, CL4331.Contig2\_All, CL4375.Contig2\_All, CL452.Contig2\_All, CL4551.Contig1\_All, CL4551.Contig2\_All, CL4679.Contig1\_All, CL4783.Contig2\_All, CL4803.Contig1\_All, CL4874.Contig1\_All, CL4884.Contig2\_All, CL4884.Contig4\_All, CL497.Contig1\_All, CL5067.Contig2\_All, CL5078.Contig12\_All, CL5107.Contig1\_All, CL5107.Contig2\_All, CL5116.Contig1\_All, CL5150.Contig1\_All, CL5150.Contig4\_All, CL5214.Contig1\_All, CL5214.Contig2\_All, CL5319.Contig1\_All, CL5355.Contig1\_All, CL5405.Contig1\_All, CL560.Contig1\_All, CL560.Contig2\_All, CL560.Contig4\_All, CL700.Contig1\_All, CL700.Contig2\_All, CL846.Contig2\_All, CL846.Contig5\_All, CL877.Contig1\_All, CL92.Contig3\_All, CL926.Contig1\_All, CL926.Contig2\_All, Unigene10053\_All, Unigene10307\_All, Unigene10361\_All, Unigene10528\_All, Unigene1055\_All, Unigene10586\_All, Unigene10662\_All, Unigene10875\_All, Unigene11025\_All, Unigene11092\_All, Unigene11099\_All, Unigene11460\_All, Unigene11623\_All, Unigene1172\_All, Unigene11785\_All, Unigene11807\_All, Unigene11811\_All, Unigene11869\_All, Unigene11873\_All, Unigene11929\_All, Unigene11930\_All, Unigene12006\_All, Unigene12047\_All, Unigene12124\_All, Unigene12158\_All, Unigene12191\_All, Unigene12234\_All, Unigene12249\_All, Unigene12299\_All, Unigene12322\_All, Unigene12410\_All, Unigene12414\_All, Unigene12464\_All, Unigene12498\_All, Unigene12534\_All, Unigene12582\_All, Unigene12608\_All, Unigene1260\_All, Unigene12618\_All, Unigene12669\_All, Unigene12782\_All, Unigene12838\_All, Unigene12866\_All, Unigene12868\_All, Unigene12894\_All, Unigene12949\_All, Unigene13010\_All, Unigene13073\_All, Unigene1313\_All, Unigene13153\_All, Unigene13265\_All, Unigene13507\_All, Unigene13527\_All, Unigene13541\_All, Unigene13944\_All, Unigene1400\_All, Unigene14100\_All, Unigene15302\_All, Unigene15303\_All, Unigene16279\_All, Unigene1651\_All, Unigene16820\_All, Unigene17244\_All, Unigene1730\_All, Unigene17486\_All, Unigene17487\_All, Unigene1768\_All, Unigene1775\_All, Unigene17856\_All, Unigene18149\_All, Unigene18867\_All, Unigene19870\_All, Unigene19925\_All, Unigene19947\_All, Unigene20230\_All, Unigene2075\_All, Unigene2203\_All, Unigene2255\_All, Unigene246\_All, Unigene2691\_All, Unigene2780\_All, Unigene2783\_All, Unigene2891\_All, Unigene3415\_All, Unigene3712\_All, Unigene3991\_All, Unigene407\_All, Unigene4161\_All, Unigene4251\_All, Unigene4593\_All, Unigene4662\_All, Unigene4749\_All, Unigene4764\_All, Unigene4771\_All, Unigene4781\_All, Unigene4786\_All, Unigene4800\_All, Unigene4944\_All, Unigene4945\_All, Unigene4954\_All, Unigene5055\_All, Unigene5067\_All, Unigene5079\_All, Unigene5092\_All, Unigene5264\_All, Unigene5361\_All, Unigene5362\_All, Unigene5789\_All, Unigene6009\_All, Unigene6014\_All, Unigene6236\_All, Unigene6303\_All, Unigene6681\_All, Unigene6704\_All, Unigene6976\_All, Unigene7270\_All, Unigene7646\_All, Unigene764\_All, Unigene7740\_All, Unigene7764\_All, Unigene7776\_All, Unigene7981\_All, Unigene8003\_All, Unigene8152\_All, Unigene8152\_All, Unigene8228\_All, Unigene8235\_All, Unigene8692\_All, Unigene8720\_All, Unigene9019\_All, Unigene9039\_All, Unigene9252\_All, Unigene9710\_All, Unigene9742\_All, Unigene9893\_All, Unigene9895\_All

33

[Herpes simplex infection](#)

CL1085.Contig3\_All, CL1188.Contig1\_All, CL1188.Contig2\_All, CL1470.Contig1\_All, CL1470.Contig2\_All, CL1563.Contig2\_All, CL1687.Contig4\_All, CL1812.Contig1\_All, CL1812.Contig2\_All, CL2049.Contig1\_All, CL2049.Contig3\_All, CL2170.Contig2\_All, CL2170.Contig5\_All, CL2222.Contig9\_All, CL2306.Contig2\_All, CL244.Contig2\_All, CL2480.Contig2\_All, CL2480.Contig3\_All, CL2789.Contig2\_All, CL2848.Contig4\_All, CL2882.Contig1\_All, CL2882.Contig2\_All, CL3057.Contig1\_All, CL3057.Contig2\_All, CL3420.Contig1\_All, CL345.Contig1\_All, CL3547.Contig1\_All, CL3547.Contig2\_All, CL3547.Contig4\_All, CL3561.Contig1\_All, CL3561.Contig2\_All, CL3570.Contig1\_All, CL3653.Contig1\_All, CL3664.Contig1\_All, CL3664.Contig2\_All, CL3689.Contig2\_All, CL3787.Contig1\_All, CL3787.Contig2\_All, CL3955.Contig1\_All, CL3963.Contig1\_All, CL4002.Contig1\_All, CL4150.Contig4\_All, CL4375.Contig2\_All, CL4494.Contig1\_All, CL4494.Contig2\_All, CL4494.Contig3\_All, CL4514.Contig2\_All, CL4555.Contig1\_All, CL4679.Contig1\_All, CL4679.Contig2\_All, CL4736.Contig1\_All, CL4736.Contig2\_All, CL5115.Contig1\_All, CL560.Contig1\_All, CL560.Contig2\_All, CL560.Contig4\_All, CL598.Contig1\_All, CL598.Contig2\_All, CL741.Contig2\_All, Unigene1048\_All, Unigene10619\_All, Unigene10757\_All, Unigene11040\_All, Unigene11067\_All, Unigene11068\_All, Unigene11156\_All, Unigene11157\_All, Unigene1137\_All, Unigene11411\_All, Unigene1168\_All, Unigene1169\_All, Unigene11724\_All, Unigene11789\_All, Unigene11814\_All, Unigene11877\_All, Unigene11920\_All, Unigene12006\_All, Unigene12017\_All, Unigene12052\_All, Unigene12161\_All, Unigene12188\_All, Unigene12259\_All, Unigene12299\_All, Unigene12319\_All, Unigene12405\_All, Unigene12414\_All, Unigene12464\_All, Unigene1247\_All, Unigene12515\_All, Unigene12516\_All, Unigene12591\_All, Unigene12682\_All, Unigene12740\_All, Unigene1278\_All, Unigene12877\_All, Unigene12891\_All, Unigene12903\_All, Unigene13134\_All, Unigene13403\_All, Unigene13421\_All, Unigene13541\_All, Unigene1396\_All, Unigene14208\_All, Unigene1479\_All, Unigene1512\_All, Unigene15827\_All, Unigene16120\_All, Unigene17046\_All, Unigene1757\_All, Unigene17689\_All, Unigene17702\_All, Unigene17856\_All, Unigene17875\_All, Unigene17994\_All, Unigene18195\_All, Unigene18306\_All, Unigene184\_All, Unigene1941\_All, Unigene1971\_All, Unigene20095\_All, Unigene20260\_All, Unigene20941\_All, Unigene220\_All, Unigene2212\_All, Unigene2233\_All, Unigene236\_All, Unigene2513\_All, Unigene3131\_All, Unigene3751\_All, Unigene3871\_All, Unigene4022\_All, Unigene4251\_All, Unigene4581\_All, Unigene480\_All, Unigene4817\_All, Unigene4935\_All, Unigene4954\_All, Unigene4970\_All, Unigene4975\_All, Unigene5198\_All, Unigene54\_All, Unigene5733\_All, Unigene5781\_All, Unigene5896\_All, Unigene6046\_All, Unigene6503\_All, Unigene6655\_All, Unigene6663\_All, Unigene6969\_All, Unigene7049\_All, Unigene7234\_All, Unigene7286\_All, Unigene7671\_All, Unigene7704\_All, Unigene7759\_All, Unigene8056\_All, Unigene8077\_All, Unigene8833\_All, Unigene9006\_All, Unigene9904\_All

|    |                                                         |                                                                                                                                                                                                                                                                                                                                                                                                                                                                                                                                                                                                                                                                                                                                                                                                                                                                                                                                                                                                                                                                                                                                                                                                                                                                                                                                                                                                                                                                                                                                                                                                                                                                                                                                                                                                                                                                                                                                                                                                                                                                                                                                                                                                                                                                                                                                                                                                                                                                                                                                                                                                                                                                                                                                                                                                                                                                                                                                                                                                                                                                                                                                                              |
|----|---------------------------------------------------------|--------------------------------------------------------------------------------------------------------------------------------------------------------------------------------------------------------------------------------------------------------------------------------------------------------------------------------------------------------------------------------------------------------------------------------------------------------------------------------------------------------------------------------------------------------------------------------------------------------------------------------------------------------------------------------------------------------------------------------------------------------------------------------------------------------------------------------------------------------------------------------------------------------------------------------------------------------------------------------------------------------------------------------------------------------------------------------------------------------------------------------------------------------------------------------------------------------------------------------------------------------------------------------------------------------------------------------------------------------------------------------------------------------------------------------------------------------------------------------------------------------------------------------------------------------------------------------------------------------------------------------------------------------------------------------------------------------------------------------------------------------------------------------------------------------------------------------------------------------------------------------------------------------------------------------------------------------------------------------------------------------------------------------------------------------------------------------------------------------------------------------------------------------------------------------------------------------------------------------------------------------------------------------------------------------------------------------------------------------------------------------------------------------------------------------------------------------------------------------------------------------------------------------------------------------------------------------------------------------------------------------------------------------------------------------------------------------------------------------------------------------------------------------------------------------------------------------------------------------------------------------------------------------------------------------------------------------------------------------------------------------------------------------------------------------------------------------------------------------------------------------------------------------------|
| 34 | <a href="#">Hedgehog signaling pathway</a>              | CL1452.Contig1_All, CL1471.Contig1_All, CL1843.Contig3_All, CL2208.Contig1_All, CL2268.Contig1_All, CL2268.Contig2_All, CL2782.Contig1_All, CL2782.Contig2_All, CL2838.Contig1_All, CL2838.Contig2_All, CL2838.Contig4_All, CL3293.Contig1_All, CL3315.Contig3_All, CL3315.Contig4_All, CL3923.Contig1_All, CL3923.Contig3_All, CL396.Contig21_All, CL396.Contig22_All, CL4496.Contig3_All, CL4522.Contig2_All, CL5106.Contig1_All, CL63.Contig10_All, CL63.Contig9_All, CL925.Contig2_All, CL940.Contig3_All, CL940.Contig5_All, Unigene10083_All, Unigene10373_All, Unigene10761_All, Unigene11263_All, Unigene1188_All, Unigene11922_All, Unigene12415_All, Unigene12874_All, Unigene1680_All, Unigene18477_All, Unigene18765_All, Unigene236_All, Unigene247_All, Unigene2905_All, Unigene3054_All, Unigene3715_All, Unigene3779_All, Unigene3975_All, Unigene4112_All, Unigene4314_All, Unigene4731_All, Unigene4765_All, Unigene4893_All, Unigene7025_All, Unigene7026_All, Unigene7297_All, Unigene768_All, Unigene798_All, Unigene8014_All, Unigene8784_All, Unigene8861_All, Unigene9026_All, Unigene9111_All, Unigene9279_All, Unigene9733_All                                                                                                                                                                                                                                                                                                                                                                                                                                                                                                                                                                                                                                                                                                                                                                                                                                                                                                                                                                                                                                                                                                                                                                                                                                                                                                                                                                                                                                                                                                                                                                                                                                                                                                                                                                                                                                                                                                                                                                                                     |
| 35 | <a href="#">Staphylococcus aureus infection</a>         | CL107.Contig3_All, CL1085.Contig3_All, CL1498.Contig1_All, CL2923.Contig2_All, CL3236.Contig1_All, CL326.Contig1_All, CL3489.Contig1_All, CL3848.Contig2_All, CL4535.Contig1_All, CL4597.Contig2_All, Unigene11197_All, Unigene11202_All, Unigene11922_All, Unigene17259_All, Unigene17404_All, Unigene18142_All, Unigene20583_All, Unigene2172_All, Unigene2771_All, Unigene3176_All, Unigene3337_All, Unigene649_All, Unigene7541_All, Unigene8217_All, Unigene8848_All, Unigene9855_All                                                                                                                                                                                                                                                                                                                                                                                                                                                                                                                                                                                                                                                                                                                                                                                                                                                                                                                                                                                                                                                                                                                                                                                                                                                                                                                                                                                                                                                                                                                                                                                                                                                                                                                                                                                                                                                                                                                                                                                                                                                                                                                                                                                                                                                                                                                                                                                                                                                                                                                                                                                                                                                                   |
| 36 | <a href="#">Transcriptional misregulation in cancer</a> | CL1019.Contig3_All, CL1019.Contig4_All, CL1091.Contig14_All, CL1104.Contig3_All, CL1104.Contig4_All, CL1104.Contig5_All, CL1104.Contig6_All, CL1104.Contig7_All, CL1104.Contig8_All, CL1104.Contig9_All, CL1109.Contig1_All, CL1109.Contig2_All, CL1109.Contig3_All, CL1109.Contig4_All, CL131.Contig1_All, CL131.Contig2_All, CL1387.Contig1_All, CL1387.Contig3_All, CL1433.Contig1_All, CL1433.Contig2_All, CL1444.Contig3_All, CL1637.Contig1_All, CL1648.Contig1_All, CL1985.Contig3_All, CL1985.Contig9_All, CL2052.Contig1_All, CL2052.Contig2_All, CL2066.Contig1_All, CL2156.Contig2_All, CL2353.Contig3_All, CL241.Contig1_All, CL241.Contig7_All, CL2658.Contig1_All, CL2658.Contig2_All, CL2684.Contig1_All, CL2684.Contig2_All, CL2733.Contig2_All, CL2733.Contig3_All, CL2864.Contig2_All, CL2901.Contig2_All, CL2901.Contig3_All, CL2901.Contig4_All, CL2901.Contig5_All, CL2901.Contig8_All, CL3043.Contig2_All, CL3069.Contig1_All, CL3137.Contig2_All, CL3567.Contig1_All, CL3567.Contig2_All, CL3567.Contig3_All, CL3798.Contig3_All, CL3815.Contig2_All, CL3920.Contig1_All, CL3920.Contig3_All, CL4158.Contig4_All, CL4158.Contig7_All, CL4381.Contig1_All, CL4477.Contig1_All, CL4477.Contig3_All, CL48.Contig1_All, CL4890.Contig1_All, CL5023.Contig1_All, CL504.Contig1_All, CL504.Contig2_All, CL5155.Contig1_All, CL5155.Contig3_All, CL5204.Contig1_All, CL5204.Contig2_All, CL5236.Contig4_All, CL5236.Contig5_All, CL5452.Contig2_All, CL5452.Contig5_All, CL5452.Contig6_All, CL653.Contig1_All, CL72.Contig1_All, CL72.Contig2_All, CL748.Contig1_All, CL748.Contig3_All, CL83.Contig2_All, CL869.Contig1_All, CL869.Contig2_All, CL880.Contig3_All, CL95.Contig1_All, Unigene10001_All, Unigene10098_All, Unigene10344_All, Unigene1045_All, Unigene1046_All, Unigene10687_All, Unigene10762_All, Unigene10833_All, Unigene11145_All, Unigene11206_All, Unigene11384_All, Unigene1150_All, Unigene11579_All, Unigene1163_All, Unigene11652_All, Unigene12016_All, Unigene12044_All, Unigene12228_All, Unigene12322_All, Unigene1238_All, Unigene12810_All, Unigene1301_All, Unigene13060_All, Unigene13062_All, Unigene145_All, Unigene1663_All, Unigene1679_All, Unigene1757_All, Unigene1797_All, Unigene18278_All, Unigene18388_All, Unigene18390_All, Unigene1857_All, Unigene19340_All, Unigene19758_All, Unigene20090_All, Unigene200_All, Unigene2089_All, Unigene2160_All, Unigene2525_All, Unigene2654_All, Unigene3121_All, Unigene3982_All, Unigene4082_All, Unigene4101_All, Unigene4144_All, Unigene4157_All, Unigene4676_All, Unigene4677_All, Unigene4696_All, Unigene4807_All, Unigene5153_All, Unigene5179_All, Unigene5468_All, Unigene5623_All, Unigene5643_All, Unigene5770_All, Unigene5877_All, Unigene6009_All, Unigene6058_All, Unigene6069_All, Unigene6096_All, Unigene6222_All, Unigene6223_All, Unigene6236_All, Unigene6265_All, Unigene6916_All, Unigene6961_All, Unigene7190_All, Unigene7220_All, Unigene7287_All, Unigene8102_All, Unigene8232_All, Unigene8848_All, Unigene9006_All, Unigene9065_All, Unigene9067_All, Unigene9140_All, Unigene9552_All, Unigene9745_All, Unigene9867_All |
| 37 | <a href="#">Phototransduction</a>                       | CL1048.Contig2_All, CL1286.Contig2_All, CL1805.Contig2_All, CL1805.Contig3_All, CL1823.Contig8_All, CL2014.Contig4_All, CL2014.Contig5_All, CL2014.Contig6_All, CL2131.Contig4_All, CL2131.Contig5_All, CL2131.Contig6_All, CL2131.Contig8_All, CL2402.Contig1_All, CL2466.Contig1_All, CL2466.Contig2_All, CL2468.Contig1_All, CL2468.Contig2_All, CL2642.Contig1_All, CL2642.Contig2_All, CL2801.Contig1_All, CL2801.Contig2_All, CL3023.Contig1_All, CL3023.Contig2_All, CL3023.Contig3_All, CL3023.Contig4_All, CL3023.Contig5_All, CL3667.Contig1_All, CL3667.Contig2_All, CL3667.Contig3_All, CL3803.Contig1_All, CL3803.Contig2_All, CL4395.Contig1_All, CL4509.Contig1_All, CL4509.Contig2_All, CL4633.Contig1_All, CL4633.Contig2_All, CL484.Contig1_All, CL497.Contig2_All, CL497.Contig3_All, CL772.Contig1_All, CL772.Contig2_All, Unigene10006_All, Unigene10574_All, Unigene11054_All, Unigene12315_All, Unigene12719_All, Unigene16098_All, Unigene16498_All, Unigene16769_All, Unigene17959_All, Unigene18121_All, Unigene2209_All, Unigene3327_All, Unigene3996_All, Unigene4009_All, Unigene4013_All, Unigene4221_All, Unigene4269_All, Unigene4541_All, Unigene4780_All, Unigene5051_All, Unigene5675_All, Unigene5803_All, Unigene6266_All, Unigene6525_All, Unigene7104_All, Unigene7869_All, Unigene8026_All, Unigene8786_All, Unigene9137_All, Unigene9851_All                                                                                                                                                                                                                                                                                                                                                                                                                                                                                                                                                                                                                                                                                                                                                                                                                                                                                                                                                                                                                                                                                                                                                                                                                                                                                                                                                                                                                                                                                                                                                                                                                                                                                                                                                                        |

|    |                                      |                                                                                                                                                                                                                                                                                                                                                                                                                                                                                                                                                                                                                                                                                                                                                                                                                                                                                                                                                                                                                                                                                                                                                                                                                                                                                                                                                                                                                                                                                                                                                                                                                                                                                                                                                                                                                                                                                                                                                                                                                                                                                                                                                                                                                                                                                                                                                                                                                                                                                                                                  |
|----|--------------------------------------|----------------------------------------------------------------------------------------------------------------------------------------------------------------------------------------------------------------------------------------------------------------------------------------------------------------------------------------------------------------------------------------------------------------------------------------------------------------------------------------------------------------------------------------------------------------------------------------------------------------------------------------------------------------------------------------------------------------------------------------------------------------------------------------------------------------------------------------------------------------------------------------------------------------------------------------------------------------------------------------------------------------------------------------------------------------------------------------------------------------------------------------------------------------------------------------------------------------------------------------------------------------------------------------------------------------------------------------------------------------------------------------------------------------------------------------------------------------------------------------------------------------------------------------------------------------------------------------------------------------------------------------------------------------------------------------------------------------------------------------------------------------------------------------------------------------------------------------------------------------------------------------------------------------------------------------------------------------------------------------------------------------------------------------------------------------------------------------------------------------------------------------------------------------------------------------------------------------------------------------------------------------------------------------------------------------------------------------------------------------------------------------------------------------------------------------------------------------------------------------------------------------------------------|
| 38 | <a href="#">Prion diseases</a>       | CL1012.Contig4_All, CL1012.Contig5_All, CL1012.Contig6_All, CL1012.Contig7_All, CL1012.Contig9_All, CL1054.Contig1_All, CL1054.Contig2_All, CL1193.Contig1_All, CL1193.Contig2_All, CL1193.Contig3_All, CL1452.Contig1_All, CL1925.Contig1_All, CL2165.Contig2_All, CL2563.Contig2_All, CL257.Contig1_All, CL257.Contig2_All, CL2686.Contig1_All, CL2686.Contig2_All, CL2824.Contig3_All, CL320.Contig1_All, CL320.Contig2_All, CL3742.Contig1_All, CL400.Contig1_All, CL400.Contig2_All, CL4787.Contig1_All, CL5048.Contig1_All, CL5256.Contig1_All, CL5256.Contig2_All, CL5256.Contig4_All, CL5432.Contig1_All, CL558.Contig1_All, CL558.Contig2_All, CL558.Contig4_All, CL940.Contig3_All, CL940.Contig5_All, Unigene10374_All, Unigene1040_All, Unigene10837_All, Unigene10948_All, Unigene12109_All, Unigene12175_All, Unigene12186_All, Unigene12810_All, Unigene12871_All, Unigene12890_All, Unigene13167_All, Unigene13331_All, Unigene15587_All, Unigene15863_All, Unigene16093_All, Unigene16965_All, Unigene16966_All, Unigene17728_All, Unigene18054_All, Unigene18488_All, Unigene18535_All, Unigene19237_All, Unigene19880_All, Unigene230_All, Unigene3080_All, Unigene32_All, Unigene3314_All, Unigene3779_All, Unigene4112_All, Unigene5064_All, Unigene6101_All, Unigene7093_All, Unigene8986_All, Unigene9065_All, Unigene9097_All, Unigene9733_All, Unigene9971_All                                                                                                                                                                                                                                                                                                                                                                                                                                                                                                                                                                                                                                                                                                                                                                                                                                                                                                                                                                                                                                                                                                                                          |
| 39 | <a href="#">Pancreatic secretion</a> | CL1087.Contig2_All, CL1087.Contig3_All, CL1535.Contig3_All, CL1880.Contig1_All, CL1880.Contig2_All, CL1880.Contig3_All, CL1987.Contig1_All, CL199.Contig1_All, CL2137.Contig1_All, CL2137.Contig2_All, CL2182.Contig1_All, CL2182.Contig3_All, CL2182.Contig4_All, CL2213.Contig1_All, CL2213.Contig2_All, CL2213.Contig4_All, CL2432.Contig2_All, CL2474.Contig2_All, CL2854.Contig1_All, CL2930.Contig5_All, CL349.Contig12_All, CL3545.Contig2_All, CL3776.Contig2_All, CL39.Contig1_All, CL39.Contig2_All, CL39.Contig3_All, CL39.Contig4_All, CL4005.Contig2_All, CL4005.Contig3_All, CL4084.Contig1_All, CL4084.Contig2_All, CL41.Contig3_All, CL41.Contig4_All, CL41.Contig8_All, CL4262.Contig2_All, CL440.Contig3_All, CL440.Contig5_All, CL440.Contig6_All, CL5310.Contig2_All, CL5391.Contig1_All, CL5391.Contig2_All, CL5399.Contig1_All, CL5399.Contig2_All, CL5428.Contig1_All, CL5428.Contig2_All, CL573.Contig6_All, CL600.Contig1_All, CL600.Contig2_All, CL600.Contig3_All, CL600.Contig4_All, CL600.Contig6_All, CL662.Contig1_All, CL691.Contig1_All, CL860.Contig10_All, CL860.Contig8_All, CL860.Contig9_All, CL878.Contig1_All, CL878.Contig2_All, CL878.Contig3_All, CL878.Contig4_All, CL878.Contig5_All, CL940.Contig3_All, CL940.Contig5_All, CL974.Contig2_All, Unigene10040_All, Unigene10058_All, Unigene10131_All, Unigene10471_All, Unigene10594_All, Unigene11086_All, Unigene11307_All, Unigene11480_All, Unigene11482_All, Unigene11483_All, Unigene11660_All, Unigene12454_All, Unigene125_All, Unigene14005_All, Unigene15194_All, Unigene15195_All, Unigene17380_All, Unigene18002_All, Unigene18652_All, Unigene18672_All, Unigene18898_All, Unigene18993_All, Unigene2002_All, Unigene2003_All, Unigene2029_All, Unigene2170_All, Unigene2172_All, Unigene2209_All, Unigene2250_All, Unigene2263_All, Unigene3010_All, Unigene3029_All, Unigene3033_All, Unigene3034_All, Unigene3036_All, Unigene3037_All, Unigene3042_All, Unigene4053_All, Unigene4070_All, Unigene4211_All, Unigene4310_All, Unigene4323_All, Unigene4532_All, Unigene5724_All, Unigene5808_All, Unigene5877_All, Unigene590_All, Unigene6215_All, Unigene6639_All, Unigene7061_All, Unigene7206_All, Unigene7284_All, Unigene7658_All, Unigene7957_All, Unigene8039_All, Unigene8109_All, Unigene8208_All, Unigene8422_All, Unigene8464_All, Unigene8700_All, Unigene8770_All, Unigene8848_All, Unigene9050_All, Unigene9163_All, Unigene93_All, Unigene9437_All, Unigene9668_All, Unigene9710_All, Unigene9877_All |
| 40 | <a href="#">Morphine addiction</a>   | CL1184.Contig1_All, CL1184.Contig2_All, CL1184.Contig3_All, CL1184.Contig4_All, CL1184.Contig5_All, CL1452.Contig1_All, CL1546.Contig1_All, CL1546.Contig3_All, CL1546.Contig4_All, CL1546.Contig5_All, CL1546.Contig6_All, CL1546.Contig7_All, CL1546.Contig8_All, CL1675.Contig2_All, CL2161.Contig1_All, CL2161.Contig2_All, CL2182.Contig1_All, CL2182.Contig3_All, CL2182.Contig4_All, CL225.Contig1_All, CL225.Contig3_All, CL2301.Contig2_All, CL2301.Contig4_All, CL260.Contig15_All, CL2642.Contig1_All, CL2642.Contig2_All, CL2703.Contig2_All, CL2735.Contig1_All, CL2770.Contig1_All, CL2770.Contig2_All, CL3166.Contig1_All, CL3507.Contig1_All, CL3597.Contig1_All, CL3597.Contig2_All, CL3676.Contig1_All, CL3836.Contig1_All, CL3836.Contig2_All, CL39.Contig1_All, CL39.Contig2_All, CL39.Contig3_All, CL39.Contig4_All, CL4005.Contig2_All, CL4005.Contig3_All, CL4262.Contig2_All, CL440.Contig3_All, CL440.Contig5_All, CL440.Contig6_All, CL4923.Contig2_All, CL5105.Contig1_All, CL5105.Contig2_All, CL5203.Contig1_All, CL5203.Contig2_All, CL5391.Contig1_All, CL5391.Contig2_All, CL677.Contig2_All, CL679.Contig1_All, CL679.Contig2_All, CL847.Contig3_All, CL894.Contig1_All, CL940.Contig3_All, CL940.Contig5_All, CL973.Contig1_All, Unigene10058_All, Unigene1044_All, Unigene10931_All, Unigene11615_All, Unigene12110_All, Unigene12433_All, Unigene12535_All, Unigene13612_All, Unigene16890_All, Unigene1743_All, Unigene1766_All, Unigene176_All, Unigene17896_All, Unigene18898_All, Unigene1925_All, Unigene2029_All, Unigene2032_All, Unigene2196_All, Unigene3779_All, Unigene3967_All, Unigene4112_All, Unigene4126_All, Unigene4532_All, Unigene4780_All, Unigene5063_All, Unigene5521_All, Unigene555_All, Unigene6217_All, Unigene68_All, Unigene69_All, Unigene8071_All, Unigene8170_All, Unigene8993_All, Unigene9167_All, Unigene93_All, Unigene9733_All                                                                                                                                                                                                                                                                                                                                                                                                                                                                                                                                                                                                                          |
| 41 | <a href="#">Sulfur relay system</a>  | CL15.Contig1_All, CL15.Contig2_All, CL15.Contig3_All, CL1843.Contig1_All, CL2479.Contig1_All, CL2479.Contig2_All, CL396.Contig12_All, CL396.Contig13_All, CL396.Contig14_All, CL396.Contig15_All, CL396.Contig16_All, CL396.Contig17_All, CL396.Contig18_All, CL396.Contig19_All, CL396.Contig1_All, CL396.Contig2_All, CL396.Contig32_All, CL396.Contig3_All, CL396.Contig4_All, CL396.Contig5_All, CL396.Contig6_All, CL396.Contig7_All, CL396.Contig8_All, CL396.Contig9_All, CL4152.Contig2_All, CL4242.Contig1_All, CL491.Contig2_All, CL491.Contig6_All, CL491.Contig8_All, Unigene13496_All, Unigene3252_All, Unigene9326_All                                                                                                                                                                                                                                                                                                                                                                                                                                                                                                                                                                                                                                                                                                                                                                                                                                                                                                                                                                                                                                                                                                                                                                                                                                                                                                                                                                                                                                                                                                                                                                                                                                                                                                                                                                                                                                                                                             |

|    |                                                        |                                                                                                                                                                                                                                                                                                                                                                                                                                                                                                                                                                                                                                                                                                                                                                                                                                                                                                                                                                                                                                                                                                                                                                                                                                                                                                                                                                                                                                                                                                                                                                                                                                                                                                                                                                                                                                                                                                                                                                                                                                                                                                                                                                                                                                                                                                                                                                                                                                                                                                                                                     |
|----|--------------------------------------------------------|-----------------------------------------------------------------------------------------------------------------------------------------------------------------------------------------------------------------------------------------------------------------------------------------------------------------------------------------------------------------------------------------------------------------------------------------------------------------------------------------------------------------------------------------------------------------------------------------------------------------------------------------------------------------------------------------------------------------------------------------------------------------------------------------------------------------------------------------------------------------------------------------------------------------------------------------------------------------------------------------------------------------------------------------------------------------------------------------------------------------------------------------------------------------------------------------------------------------------------------------------------------------------------------------------------------------------------------------------------------------------------------------------------------------------------------------------------------------------------------------------------------------------------------------------------------------------------------------------------------------------------------------------------------------------------------------------------------------------------------------------------------------------------------------------------------------------------------------------------------------------------------------------------------------------------------------------------------------------------------------------------------------------------------------------------------------------------------------------------------------------------------------------------------------------------------------------------------------------------------------------------------------------------------------------------------------------------------------------------------------------------------------------------------------------------------------------------------------------------------------------------------------------------------------------------|
| 42 | <a href="#">Olfactory transduction</a>                 | CL1048.Contig2_All, CL1286.Contig2_All, CL1452.Contig1_All, CL1800.Contig2_All, CL1800.Contig3_All, CL1823.Contig8_All, CL2014.Contig4_All, CL2014.Contig5_All, CL2014.Contig6_All, CL2131.Contig4_All, CL2131.Contig5_All, CL2131.Contig6_All, CL2131.Contig8_All, CL2146.Contig4_All, CL2466.Contig1_All, CL2466.Contig2_All, CL2466.Contig3_All, CL2468.Contig1_All, CL2468.Contig2_All, CL260.Contig15_All, CL2642.Contig1_All, CL2642.Contig2_All, CL2762.Contig4_All, CL3311.Contig1_All, CL3311.Contig2_All, CL3667.Contig1_All, CL3667.Contig2_All, CL3667.Contig3_All, CL3679.Contig2_All, CL3803.Contig1_All, CL3803.Contig2_All, CL4181.Contig1_All, CL4181.Contig4_All, CL4395.Contig1_All, CL44.Contig10_All, CL44.Contig12_All, CL44.Contig13_All, CL44.Contig16_All, CL44.Contig17_All, CL44.Contig18_All, CL44.Contig19_All, CL44.Contig1_All, CL44.Contig22_All, CL44.Contig23_All, CL44.Contig2_All, CL44.Contig3_All, CL44.Contig4_All, CL44.Contig5_All, CL44.Contig6_All, CL44.Contig8_All, CL44.Contig9_All, CL4509.Contig1_All, CL4509.Contig2_All, CL4633.Contig1_All, CL4633.Contig2_All, CL4684.Contig1_All, CL484.Contig1_All, CL497.Contig2_All, CL497.Contig3_All, CL5004.Contig1_All, CL772.Contig1_All, CL772.Contig2_All, CL940.Contig3_All, CL940.Contig5_All, Unigene10006_All, Unigene10131_All, Unigene10574_All, Unigene11054_All, Unigene11730_All, Unigene12315_All, Unigene12719_All, Unigene16098_All, Unigene16498_All, Unigene16769_All, Unigene17001_All, Unigene17469_All, Unigene17959_All, Unigene265_All, Unigene2795_All, Unigene3327_All, Unigene3779_All, Unigene3861_All, Unigene3996_All, Unigene4009_All, Unigene4013_All, Unigene4112_All, Unigene4221_All, Unigene4269_All, Unigene4541_All, Unigene4643_All, Unigene4783_All, Unigene4817_All, Unigene5051_All, Unigene555_All, Unigene5675_All, Unigene5803_All, Unigene6266_All, Unigene6525_All, Unigene7039_All, Unigene7104_All, Unigene7658_All, Unigene7869_All, Unigene8026_All, Unigene8039_All, Unigene8210_All, Unigene9117_All, Unigene9137_All, Unigene9733_All, Unigene9851_All                                                                                                                                                                                                                                                                                                                                                                                                                                              |
| 43 | <a href="#">Bacterial invasion of epithelial cells</a> | CL1066.Contig1_All, CL1066.Contig2_All, CL1066.Contig3_All, CL1355.Contig1_All, CL1535.Contig3_All, CL156.Contig1_All, CL156.Contig3_All, CL156.Contig4_All, CL1723.Contig1_All, CL1723.Contig2_All, CL1723.Contig7_All, CL1795.Contig5_All, CL1803.Contig1_All, CL1874.Contig2_All, CL1953.Contig1_All, CL2019.Contig1_All, CL2019.Contig2_All, CL2034.Contig1_All, CL2034.Contig2_All, CL2066.Contig1_All, CL2085.Contig1_All, CL2091.Contig5_All, CL2091.Contig6_All, CL2375.Contig2_All, CL2658.Contig1_All, CL2658.Contig2_All, CL271.Contig2_All, CL2975.Contig2_All, CL3027.Contig3_All, CL3114.Contig2_All, CL3116.Contig2_All, CL3315.Contig3_All, CL3315.Contig4_All, CL3436.Contig1_All, CL3436.Contig4_All, CL3436.Contig9_All, CL3510.Contig3_All, CL367.Contig1_All, CL367.Contig2_All, CL367.Contig3_All, CL3888.Contig2_All, CL399.Contig10_All, CL399.Contig1_All, CL399.Contig2_All, CL399.Contig3_All, CL399.Contig4_All, CL399.Contig5_All, CL399.Contig6_All, CL399.Contig7_All, CL399.Contig8_All, CL399.Contig9_All, CL402.Contig1_All, CL4088.Contig2_All, CL4130.Contig1_All, CL4203.Contig3_All, CL4381.Contig1_All, CL4479.Contig2_All, CL4479.Contig3_All, CL4479.Contig5_All, CL4541.Contig1_All, CL4541.Contig2_All, CL4559.Contig2_All, CL4559.Contig3_All, CL495.Contig11_All, CL495.Contig1_All, CL495.Contig3_All, CL495.Contig4_All, CL495.Contig5_All, CL495.Contig6_All, CL5212.Contig1_All, CL5212.Contig2_All, CL5361.Contig2_All, CL5361.Contig4_All, CL5468.Contig3_All, CL695.Contig16_All, CL748.Contig1_All, CL748.Contig3_All, Unigene10097_All, Unigene10448_All, Unigene10998_All, Unigene11082_All, Unigene11307_All, Unigene11459_All, Unigene11521_All, Unigene11597_All, Unigene11598_All, Unigene11599_All, Unigene12201_All, Unigene12603_All, Unigene12684_All, Unigene13036_All, Unigene13092_All, Unigene13225_All, Unigene13978_All, Unigene1447_All, Unigene1679_All, Unigene16840_All, Unigene16963_All, Unigene1855_All, Unigene18598_All, Unigene19601_All, Unigene2741_All, Unigene278_All, Unigene3088_All, Unigene3482_All, Unigene3945_All, Unigene4207_All, Unigene5303_All, Unigene5727_All, Unigene5808_All, Unigene5813_All, Unigene5873_All, Unigene6014_All, Unigene6029_All, Unigene7016_All, Unigene7058_All, Unigene7547_All, Unigene7702_All, Unigene7751_All, Unigene783_All, Unigene8184_All, Unigene8357_All, Unigene8933_All, Unigene9050_All, Unigene9379_All, Unigene9740_All, Unigene9785_All, Unigene9787_All, Unigene9877_All, Unigene9902_All, Unigene9947_All |

44

[Spliceosome](#)

CL1014.Contig1\_All, CL1014.Contig2\_All, CL104.Contig3\_All, CL104.Contig4\_All, CL104.Contig5\_All, CL1045.Contig2\_All, CL1054.Contig1\_All, CL1054.Contig2\_All, CL1279.Contig1\_All, CL1279.Contig2\_All, CL1291.Contig1\_All, CL1291.Contig2\_All, CL1291.Contig3\_All, CL1291.Contig4\_All, CL1339.Contig2\_All, CL1406.Contig1\_All, CL1406.Contig2\_All, CL1457.Contig1\_All, CL1457.Contig2\_All, CL1457.Contig4\_All, CL1485.Contig1\_All, CL1485.Contig2\_All, CL1485.Contig3\_All, CL1485.Contig4\_All, CL1485.Contig5\_All, CL1485.Contig6\_All, CL1485.Contig7\_All, CL1485.Contig8\_All, CL1487.Contig8\_All, CL1498.Contig1\_All, CL1507.Contig1\_All, CL1507.Contig2\_All, CL160.Contig1\_All, CL1603.Contig2\_All, CL1884.Contig1\_All, CL1925.Contig1\_All, CL196.Contig2\_All, CL196.Contig4\_All, CL196.Contig5\_All, CL196.Contig7\_All, CL196.Contig8\_All, CL2044.Contig1\_All, CL2044.Contig5\_All, CL2165.Contig2\_All, CL2202.Contig1\_All, CL2202.Contig2\_All, CL2251.Contig1\_All, CL2251.Contig2\_All, CL2480.Contig2\_All, CL2480.Contig3\_All, CL264.Contig4\_All, CL264.Contig9\_All, CL2664.Contig1\_All, CL2664.Contig2\_All, CL2664.Contig3\_All, CL2686.Contig1\_All, CL2686.Contig2\_All, CL2700.Contig1\_All, CL2700.Contig2\_All, CL2718.Contig1\_All, CL2830.Contig6\_All, CL2864.Contig2\_All, CL2904.Contig1\_All, CL2904.Contig2\_All, CL2909.Contig1\_All, CL2909.Contig3\_All, CL2909.Contig4\_All, CL2945.Contig1\_All, CL3024.Contig1\_All, CL3057.Contig1\_All, CL3057.Contig2\_All, CL3069.Contig1\_All, CL319.Contig10\_All, CL319.Contig11\_All, CL319.Contig1\_All, CL319.Contig9\_All, CL3224.Contig1\_All, CL3488.Contig1\_All, CL3488.Contig2\_All, CL3488.Contig3\_All, CL3547.Contig1\_All, CL3547.Contig2\_All, CL3547.Contig4\_All, CL3570.Contig1\_All, CL3579.Contig1\_All, CL36.Contig3\_All, CL3616.Contig1\_All, CL3653.Contig1\_All, CL3955.Contig1\_All, CL4098.Contig3\_All, CL4150.Contig4\_All, CL4155.Contig1\_All, CL4375.Contig2\_All, CL4394.Contig2\_All, CL449.Contig1\_All, CL4679.Contig1\_All, CL4679.Contig2\_All, CL48.Contig1\_All, CL4803.Contig1\_All, CL4808.Contig1\_All, CL4955.Contig1\_All, CL4955.Contig2\_All, CL5046.Contig1\_All, CL5046.Contig2\_All, CL5077.Contig1\_All, CL5077.Contig2\_All, CL5107.Contig1\_All, CL5107.Contig2\_All, CL5214.Contig1\_All, CL5214.Contig2\_All, CL5229.Contig1\_All, CL5229.Contig2\_All, CL5256.Contig1\_All, CL5256.Contig2\_All, CL5256.Contig4\_All, CL5262.Contig1\_All, CL5262.Contig2\_All, CL5384.Contig1\_All, CL5384.Contig2\_All, CL5467.Contig2\_All, CL558.Contig1\_All, CL558.Contig2\_All, CL558.Contig4\_All, CL56.Contig1\_All, CL56.Contig4\_All, CL603.Contig1\_All, CL603.Contig2\_All, CL603.Contig3\_All, CL746.Contig1\_All, CL79.Contig2\_All, CL83.Contig2\_All, Unigene10053\_All, Unigene10210\_All, Unigene1021\_All, Unigene10220\_All, Unigene10221\_All, Unigene10312\_All, Unigene10344\_All, Unigene1048\_All, Unigene10744\_All, Unigene10837\_All, Unigene10905\_All, Unigene11044\_All, Unigene11067\_All, Unigene11068\_All, Unigene11098\_All, Unigene11523\_All, Unigene11579\_All, Unigene11652\_All, Unigene11789\_All, Unigene11807\_All, Unigene11885\_All, Unigene11905\_All, Unigene11920\_All, Unigene11937\_All, Unigene11946\_All, Unigene11950\_All, Unigene11961\_All, Unigene12005\_All, Unigene12044\_All, Unigene12052\_All, Unigene12078\_All, Unigene12122\_All, Unigene12124\_All, Unigene12129\_All, Unigene12192\_All, Unigene12289\_All, Unigene12299\_All, Unigene12309\_All, Unigene12319\_All, Unigene12335\_All, Unigene12383\_All, Unigene12405\_All, Unigene12414\_All, Unigene12464\_All, Unigene12474\_All, Unigene12495\_All, Unigene12515\_All, Unigene12618\_All, Unigene12661\_All, Unigene12663\_All, Unigene12669\_All, Unigene12682\_All, Unigene12696\_All, Unigene12764\_All, Unigene12949\_All, Unigene12991\_All, Unigene13010\_All, Unigene13147\_All, Unigene13167\_All, Unigene13175\_All, Unigene1331\_All, Unigene13403\_All, Unigene13731\_All, Unigene13938\_All, Unigene13\_All, Unigene1400\_All, Unigene15587\_All, Unigene15863\_All, Unigene16093\_All, Unigene1697\_All, Unigene16985\_All, Unigene1737\_All, Unigene17689\_All, Unigene17964\_All, Unigene18306\_All, Unigene18381\_All, Unigene18388\_All, Unigene18390\_All, Unigene184\_All, Unigene18535\_All, Unigene1971\_All, Unigene2063\_All, Unigene20941\_All, Unigene2212\_All, Unigene2812\_All, Unigene2872\_All, Unigene3554\_All, Unigene367\_All, Unigene3724\_All, Unigene3751\_All, Unigene3835\_All, Unigene3920\_All, Unigene3950\_All, Unigene4226\_All, Unigene453\_All, Unigene4859\_All, Unigene4954\_All, Unigene5079\_All, Unigene5092\_All, Unigene5125\_All, Unigene5215\_All, Unigene5348\_All, Unigene5498\_All, Unigene5682\_All, Unigene5717\_All, Unigene5789\_All, Unigene5945\_All, Unigene5956\_All, Unigene5993\_All, Unigene6014\_All, Unigene6043\_All, Unigene6208\_All, Unigene6225\_All, Unigene6503\_All, Unigene67\_All, Unigene6969\_All, Unigene6971\_All, Unigene7283\_All, Unigene7646\_All, Unigene7744\_All, Unigene780\_All, Unigene7929\_All, Unigene7988\_All, Unigene8056\_All, Unigene8077\_All, Unigene8078\_All, Unigene8247\_All, Unigene8301\_All, Unigene832\_All, Unigene8580\_All, Unigene8768\_All, Unigene9085\_All, Unigene9091\_All, Unigene9153\_All, Unigene921\_All, Unigene9448\_All, Unigene9611\_All, Unigene9820\_All, Unigene9839\_All, Unigene9855\_All, Unigene9866\_All, Unigene9896\_All, Unigene9971\_All

45

[Long-term depression](#)

CL126.Contig2\_All, CL1559.Contig1\_All, CL199.Contig1\_All, CL2182.Contig1\_All, CL2182.Contig3\_All, CL2182.Contig4\_All, CL241.Contig1\_All, CL241.Contig7\_All, CL2432.Contig2\_All, CL2930.Contig5\_All, CL3294.Contig1\_All, CL3311.Contig1\_All, CL3311.Contig2\_All, CL39.Contig1\_All, CL39.Contig2\_All, CL39.Contig3\_All, CL39.Contig4\_All, CL4181.Contig1\_All, CL4181.Contig4\_All, CL4439.Contig2\_All, CL4727.Contig2\_All, CL4787.Contig1\_All, CL4923.Contig2\_All, CL5098.Contig2\_All, CL5310.Contig2\_All, CL5391.Contig1\_All, CL5391.Contig2\_All, CL5399.Contig1\_All, CL5399.Contig2\_All, CL648.Contig2\_All, CL691.Contig1\_All, CL860.Contig10\_All, CL860.Contig8\_All, CL860.Contig9\_All, CL940.Contig3\_All, CL940.Contig5\_All, CL95.Contig1\_All, Unigene10058\_All, Unigene10242\_All, Unigene11730\_All, Unigene12671\_All, Unigene13432\_All, Unigene15176\_All, Unigene1743\_All, Unigene176\_All, Unigene18898\_All, Unigene18993\_All, Unigene19288\_All, Unigene2196\_All, Unigene2209\_All, Unigene2795\_All, Unigene3029\_All, Unigene3033\_All, Unigene3034\_All, Unigene3036\_All, Unigene3037\_All, Unigene3042\_All, Unigene3861\_All, Unigene4053\_All, Unigene4070\_All, Unigene4126\_All, Unigene4532\_All, Unigene4783\_All, Unigene5521\_All, Unigene6217\_All, Unigene6242\_All, Unigene69\_All, Unigene807\_All, Unigene8422\_All, Unigene8747\_All, Unigene9437\_All

|    |                                      |                                                                                                                                                                                                                                                                                                                                                                                                                                                                                                                                                                                                                                                                                                                                                                                                                                                                                                                                                                                                                                                                                                                                                                                                                                                                                                                                                                                                                                                                                                                                                                                                                                                                                                                                                                                                                                                                                                                                                                                                                                                                                                                                                                                                                                                                                                                                                                                                                                                                                                                                                                                                                                                                                                                                                                                                                                                           |
|----|--------------------------------------|-----------------------------------------------------------------------------------------------------------------------------------------------------------------------------------------------------------------------------------------------------------------------------------------------------------------------------------------------------------------------------------------------------------------------------------------------------------------------------------------------------------------------------------------------------------------------------------------------------------------------------------------------------------------------------------------------------------------------------------------------------------------------------------------------------------------------------------------------------------------------------------------------------------------------------------------------------------------------------------------------------------------------------------------------------------------------------------------------------------------------------------------------------------------------------------------------------------------------------------------------------------------------------------------------------------------------------------------------------------------------------------------------------------------------------------------------------------------------------------------------------------------------------------------------------------------------------------------------------------------------------------------------------------------------------------------------------------------------------------------------------------------------------------------------------------------------------------------------------------------------------------------------------------------------------------------------------------------------------------------------------------------------------------------------------------------------------------------------------------------------------------------------------------------------------------------------------------------------------------------------------------------------------------------------------------------------------------------------------------------------------------------------------------------------------------------------------------------------------------------------------------------------------------------------------------------------------------------------------------------------------------------------------------------------------------------------------------------------------------------------------------------------------------------------------------------------------------------------------------|
| 46 | <a href="#">GABAergic synapse</a>    | <p>CL1273.Contig1_All, CL1273.Contig2_All, CL1452.Contig1_All, CL1586.Contig4_All, CL1599.Contig1_All, CL1599.Contig2_All, CL1675.Contig2_All, CL1802.Contig1_All, CL1802.Contig2_All, CL2161.Contig1_All, CL2161.Contig2_All, CL2182.Contig1_All, CL2182.Contig3_All, CL2182.Contig4_All, CL225.Contig1_All, CL225.Contig3_All, CL2382.Contig4_All, CL2550.Contig3_All, CL2703.Contig2_All, CL2735.Contig1_All, CL2862.Contig1_All, CL2862.Contig2_All, CL2862.Contig3_All, CL2862.Contig4_All, CL3118.Contig1_All, CL3118.Contig2_All, CL3166.Contig1_All, CL3283.Contig1_All, CL3507.Contig1_All, CL3546.Contig1_All, CL3546.Contig2_All, CL3597.Contig1_All, CL3597.Contig2_All, CL3676.Contig1_All, CL39.Contig1_All, CL39.Contig2_All, CL39.Contig3_All, CL39.Contig4_All, CL3990.Contig6_All, CL4005.Contig2_All, CL4005.Contig3_All, CL4262.Contig2_All, CL440.Contig3_All, CL440.Contig5_All, CL440.Contig6_All, CL4490.Contig1_All, CL4490.Contig2_All, CL4923.Contig2_All, CL5105.Contig1_All, CL5105.Contig2_All, CL5325.Contig2_All, CL5391.Contig1_All, CL5391.Contig2_All, CL567.Contig4_All, CL677.Contig2_All, CL679.Contig1_All, CL679.Contig2_All, CL847.Contig3_All, CL894.Contig1_All, CL940.Contig3_All, CL940.Contig5_All, CL973.Contig1_All, Unigene10412_All, Unigene1044_All, Unigene10909_All, Unigene10910_All, Unigene10931_All, Unigene11615_All, Unigene11856_All, Unigene11887_All, Unigene12110_All, Unigene12433_All, Unigene12470_All, Unigene12535_All, Unigene131_All, Unigene13612_All, Unigene16890_All, Unigene1743_All, Unigene1766_All, Unigene176_All, Unigene17763_All, Unigene17896_All, Unigene18234_All, Unigene18898_All, Unigene1925_All, Unigene19942_All, Unigene2029_All, Unigene2032_All, Unigene2196_All, Unigene2807_All, Unigene3017_All, Unigene3655_All, Unigene3779_All, Unigene4112_All, Unigene4126_All, Unigene4780_All, Unigene5521_All, Unigene6217_All, Unigene6315_All, Unigene68_All, Unigene69_All, Unigene7234_All, Unigene8071_All, Unigene8170_All, Unigene8509_All, Unigene8621_All, Unigene8993_All, Unigene9167_All, Unigene93_All, Unigene9733_All</p>                                                                                                                                                                                                                                                                                                                                                                                                                                                                                                                                                                                                                                                                                                                         |
| 47 | <a href="#">Dopaminergic synapse</a> | <p>CL1066.Contig1_All, CL1066.Contig2_All, CL1286.Contig2_All, CL1452.Contig1_All, CL1563.Contig2_All, CL1675.Contig2_All, CL1823.Contig8_All, CL1843.Contig3_All, CL2131.Contig4_All, CL2131.Contig5_All, CL2131.Contig6_All, CL2131.Contig8_All, CL2182.Contig1_All, CL2182.Contig3_All, CL2182.Contig4_All, CL2400.Contig5_All, CL244.Contig2_All, CL2468.Contig1_All, CL2468.Contig2_All, CL2475.Contig1_All, CL2475.Contig2_All, CL2642.Contig1_All, CL2642.Contig2_All, CL2873.Contig1_All, CL2873.Contig2_All, CL2930.Contig5_All, CL3286.Contig1_All, CL3667.Contig1_All, CL3667.Contig2_All, CL3667.Contig3_All, CL3689.Contig2_All, CL3787.Contig1_All, CL3787.Contig2_All, CL39.Contig1_All, CL39.Contig2_All, CL39.Contig3_All, CL39.Contig4_All, CL3920.Contig2_All, CL3948.Contig3_All, CL4002.Contig1_All, CL4302.Contig1_All, CL4302.Contig2_All, CL4302.Contig3_All, CL4302.Contig4_All, CL4395.Contig1_All, CL44.Contig10_All, CL44.Contig12_All, CL44.Contig13_All, CL44.Contig16_All, CL44.Contig17_All, CL44.Contig18_All, CL44.Contig19_All, CL44.Contig1_All, CL44.Contig22_All, CL44.Contig23_All, CL44.Contig2_All, CL44.Contig3_All, CL44.Contig4_All, CL44.Contig5_All, CL44.Contig6_All, CL44.Contig8_All, CL44.Contig9_All, CL4509.Contig1_All, CL4509.Contig2_All, CL4521.Contig1_All, CL4521.Contig2_All, CL4521.Contig3_All, CL4521.Contig5_All, CL4594.Contig1_All, CL4923.Contig2_All, CL4966.Contig1_All, CL5115.Contig1_All, CL5391.Contig1_All, CL5391.Contig2_All, CL5399.Contig1_All, CL5399.Contig2_All, CL691.Contig1_All, CL741.Contig2_All, CL761.Contig1_All, CL761.Contig2_All, CL772.Contig1_All, CL772.Contig2_All, CL870.Contig4_All, CL870.Contig8_All, CL870.Contig9_All, CL940.Contig3_All, CL940.Contig5_All, Unigene10006_All, Unigene10058_All, Unigene10242_All, Unigene10574_All, Unigene11054_All, Unigene1168_All, Unigene11922_All, Unigene12110_All, Unigene12315_All, Unigene12719_All, Unigene13432_All, Unigene1512_All, Unigene16769_All, Unigene1743_All, Unigene176_All, Unigene18898_All, Unigene18993_All, Unigene19148_All, Unigene1925_All, Unigene1941_All, Unigene2029_All, Unigene2032_All, Unigene2193_All, Unigene2196_All, Unigene2209_All, Unigene220_All, Unigene2233_All, Unigene236_All, Unigene247_All, Unigene2749_All, Unigene2760_All, Unigene3779_All, Unigene3996_All, Unigene4013_All, Unigene4022_All, Unigene4053_All, Unigene4070_All, Unigene4112_All, Unigene4116_All, Unigene4126_All, Unigene4532_All, Unigene4780_All, Unigene4935_All, Unigene4970_All, Unigene5521_All, Unigene5675_All, Unigene6217_All, Unigene6655_All, Unigene6746_All, Unigene69_All, Unigene7297_All, Unigene7298_All, Unigene7702_All, Unigene7704_All, Unigene7759_All, Unigene8422_All, Unigene8621_All, Unigene8784_All, Unigene9437_All, Unigene9733_All, Unigene9904_All</p> |
| 48 | <a href="#">Legionellosis</a>        | <p>CL1054.Contig1_All, CL1054.Contig2_All, CL1085.Contig3_All, CL1401.Contig1_All, CL1534.Contig1_All, CL1534.Contig2_All, CL1818.Contig1_All, CL1818.Contig2_All, CL1818.Contig4_All, CL1818.Contig5_All, CL1818.Contig6_All, CL1925.Contig1_All, CL1927.Contig2_All, CL2049.Contig3_All, CL2165.Contig2_All, CL2279.Contig2_All, CL2686.Contig1_All, CL2686.Contig2_All, CL2872.Contig1_All, CL2872.Contig3_All, CL2872.Contig5_All, CL2882.Contig1_All, CL2882.Contig2_All, CL3332.Contig2_All, CL3620.Contig2_All, CL3725.Contig2_All, CL4184.Contig1_All, CL4184.Contig2_All, CL4320.Contig3_All, CL5256.Contig1_All, CL5256.Contig2_All, CL5256.Contig4_All, CL5299.Contig1_All, CL5311.Contig1_All, CL5428.Contig1_All, CL5428.Contig2_All, CL558.Contig1_All, CL558.Contig2_All, CL558.Contig4_All, CL851.Contig3_All, Unigene10179_All, Unigene10711_All, Unigene10714_All, Unigene10837_All, Unigene11539_All, Unigene11724_All, Unigene11911_All, Unigene11919_All, Unigene12188_All, Unigene12284_All, Unigene12677_All, Unigene15302_All, Unigene15303_All, Unigene15587_All, Unigene15863_All, Unigene16093_All, Unigene16820_All, Unigene1757_All, Unigene17702_All, Unigene18149_All, Unigene18214_All, Unigene18535_All, Unigene20095_All, Unigene3976_All, Unigene4581_All, Unigene6058_All, Unigene7049_All, Unigene7205_All, Unigene7245_All, Unigene7776_All, Unigene9012_All, Unigene9664_All, Unigene9971_All</p>                                                                                                                                                                                                                                                                                                                                                                                                                                                                                                                                                                                                                                                                                                                                                                                                                                                                                                                                                                                                                                                                                                                                                                                                                                                                                                                                                                                                                  |



49

[Protein digestion and absorption](#)

CL1011.Contig1\_All, CL1011.Contig4\_All, CL1055.Contig1\_All, CL1055.Contig3\_All, CL1055.Contig4\_All, CL1055.Contig5\_All, CL1055.Contig6\_All, CL1055.Contig7\_All, CL1092.Contig1\_All, CL1147.Contig1\_All, CL1147.Contig2\_All, CL1183.Contig1\_All, CL1183.Contig2\_All, CL1202.Contig1\_All, CL1202.Contig2\_All, CL1436.Contig2\_All, CL1437.Contig1\_All, CL150.Contig2\_All, CL1566.Contig1\_All, CL1566.Contig2\_All, CL1668.Contig1\_All, CL1718.Contig1\_All, CL1718.Contig2\_All, CL1890.Contig4\_All, CL190.Contig1\_All, CL1989.Contig1\_All, CL1989.Contig2\_All, CL1989.Contig3\_All, CL1989.Contig4\_All, CL1989.Contig5\_All, CL2009.Contig2\_All, CL209.Contig1\_All, CL209.Contig2\_All, CL209.Contig3\_All, CL209.Contig4\_All, CL2099.Contig1\_All, CL2137.Contig1\_All, CL2137.Contig2\_All, CL2213.Contig1\_All, CL2213.Contig2\_All, CL2213.Contig4\_All, CL2252.Contig1\_All, CL2252.Contig2\_All, CL2252.Contig3\_All, CL2297.Contig2\_All, CL2474.Contig2\_All, CL259.Contig2\_All, CL259.Contig3\_All, CL2611.Contig1\_All, CL2611.Contig2\_All, CL2927.Contig1\_All, CL2927.Contig3\_All, CL2952.Contig1\_All, CL298.Contig1\_All, CL298.Contig2\_All, CL3106.Contig1\_All, CL3160.Contig2\_All, CL3327.Contig1\_All, CL3327.Contig2\_All, CL3371.Contig1\_All, CL3387.Contig1\_All, CL3387.Contig2\_All, CL3622.Contig1\_All, CL3622.Contig2\_All, CL3776.Contig2\_All, CL3797.Contig1\_All, CL3797.Contig2\_All, CL3848.Contig1\_All, CL3880.Contig1\_All, CL3880.Contig2\_All, CL4026.Contig1\_All, CL4042.Contig1\_All, CL4042.Contig2\_All, CL4042.Contig3\_All, CL41.Contig3\_All, CL41.Contig4\_All, CL41.Contig8\_All, CL4186.Contig2\_All, CL4268.Contig1\_All, CL4401.Contig2\_All, CL4401.Contig3\_All, CL4401.Contig4\_All, CL4410.Contig1\_All, CL4511.Contig1\_All, CL4844.Contig1\_All, CL4844.Contig2\_All, CL4882.Contig1\_All, CL4882.Contig2\_All, CL5152.Contig1\_All, CL5221.Contig1\_All, CL5268.Contig2\_All, CL5268.Contig3\_All, CL531.Contig1\_All, CL5373.Contig1\_All, CL5373.Contig2\_All, CL5440.Contig1\_All, CL5464.Contig1\_All, CL5464.Contig2\_All, CL5464.Contig3\_All, CL677.Contig2\_All, CL679.Contig1\_All, CL679.Contig2\_All, CL703.Contig2\_All, CL703.Contig3\_All, CL703.Contig5\_All, CL703.Contig6\_All, CL80.Contig1\_All, Unigene10007\_All, Unigene10012\_All, Unigene10093\_All, Unigene10095\_All, Unigene10096\_All, Unigene10123\_All, Unigene10171\_All, Unigene10200\_All, Unigene10238\_All, Unigene10254\_All, Unigene10316\_All, Unigene1051\_All, Unigene10594\_All, Unigene10623\_All, Unigene10705\_All, Unigene10723\_All, Unigene10724\_All, Unigene10779\_All, Unigene10787\_All, Unigene108\_All, Unigene10931\_All, Unigene1096\_All, Unigene10974\_All, Unigene10983\_All, Unigene10984\_All, Unigene11097\_All, Unigene11141\_All, Unigene11160\_All, Unigene11190\_All, Unigene11203\_All, Unigene11337\_All, Unigene11338\_All, Unigene11351\_All, Unigene11358\_All, Unigene11362\_All, Unigene11377\_All, Unigene11436\_All, Unigene11447\_All, Unigene11448\_All, Unigene11469\_All, Unigene11480\_All, Unigene11482\_All, Unigene11483\_All, Unigene11510\_All, Unigene11511\_All, Unigene11515\_All, Unigene11538\_All, Unigene11543\_All, Unigene11544\_All, Unigene11565\_All, Unigene11576\_All, Unigene11587\_All, Unigene11588\_All, Unigene11589\_All, Unigene11590\_All, Unigene11629\_All, Unigene11634\_All, Unigene11648\_All, Unigene11649\_All, Unigene11660\_All, Unigene11662\_All, Unigene11672\_All, Unigene11687\_All, Unigene11797\_All, Unigene1185\_All, Unigene1185\_All, Unigene12118\_All, Unigene12125\_All, Unigene12154\_All, Unigene12155\_All, Unigene12189\_All, Unigene12194\_All, Unigene12210\_All, Unigene12212\_All, Unigene12435\_All, Unigene12533\_All, Unigene12537\_All, Unigene12634\_All, Unigene12692\_All, Unigene12710\_All, Unigene12962\_All, Unigene12974\_All, Unigene14084\_All, Unigene140\_All, Unigene14133\_All, Unigene1445\_All, Unigene15580\_All, Unigene15741\_All, Unigene15769\_All, Unigene16727\_All, Unigene16840\_All, Unigene1714\_All, Unigene17380\_All, Unigene17679\_All, Unigene1792\_All, Unigene17992\_All, Unigene18002\_All, Unigene18371\_All, Unigene18672\_All, Unigene1926\_All, Unigene19\_All, Unigene20176\_All, Unigene2067\_All, Unigene20\_All, Unigene2170\_All, Unigene2180\_All, Unigene2190\_All, Unigene2251\_All, Unigene2297\_All, Unigene2560\_All, Unigene266\_All, Unigene284\_All, Unigene28\_All, Unigene3000\_All, Unigene3010\_All, Unigene3063\_All, Unigene3066\_All, Unigene3193\_All, Unigene3199\_All, Unigene3261\_All, Unigene3316\_All, Unigene3323\_All, Unigene3346\_All, Unigene3403\_All, Unigene3669\_All, Unigene3889\_All, Unigene3947\_All, Unigene3964\_All, Unigene4004\_All, Unigene414\_All, Unigene4310\_All, Unigene4323\_All, Unigene4418\_All, Unigene4510\_All, Unigene462\_All, Unigene4825\_All, Unigene4908\_All, Unigene4922\_All, Unigene5054\_All, Unigene5059\_All, Unigene5065\_All, Unigene5096\_All, Unigene5108\_All, Unigene5121\_All, Unigene5257\_All, Unigene5453\_All, Unigene5490\_All, Unigene563\_All, Unigene5724\_All, Unigene5799\_All, Unigene579\_All, Unigene5877\_All, Unigene5889\_All, Unigene5890\_All, Unigene590\_All, Unigene6076\_All, Unigene6215\_All, Unigene6780\_All, Unigene6886\_All, Unigene6914\_All, Unigene7054\_All, Unigene7106\_All, Unigene712\_All, Unigene7206\_All, Unigene7280\_All, Unigene7431\_All, Unigene7440\_All, Unigene7534\_All, Unigene7560\_All, Unigene7665\_All, Unigene7873\_All, Unigene7926\_All, Unigene7957\_All, Unigene8071\_All, Unigene8102\_All, Unigene8170\_All, Unigene8179\_All, Unigene8204\_All, Unigene8221\_All, Unigene8231\_All, Unigene8262\_All, Unigene8324\_All, Unigene8399\_All, Unigene8514\_All, Unigene8537\_All, Unigene8562\_All, Unigene8745\_All, Unigene8848\_All, Unigene8936\_All, Unigene8962\_All, Unigene9163\_All, Unigene9284\_All, Unigene936\_All, Unigene9611\_All, Unigene96\_All, Unigene9988\_All

|    |                                                      |                                                                                                                                                                                                                                                                                                                                                                                                                                                                                                                                                                                                                                                                                                                                                                                                                                                                                                                                                                                                                                                                                                                                                                                                                                                                                                                                                                                                                                                                                                                                                                                                                                                                                                                                                                                                                                                                                                                                                                                                                                                                                                                                                     |
|----|------------------------------------------------------|-----------------------------------------------------------------------------------------------------------------------------------------------------------------------------------------------------------------------------------------------------------------------------------------------------------------------------------------------------------------------------------------------------------------------------------------------------------------------------------------------------------------------------------------------------------------------------------------------------------------------------------------------------------------------------------------------------------------------------------------------------------------------------------------------------------------------------------------------------------------------------------------------------------------------------------------------------------------------------------------------------------------------------------------------------------------------------------------------------------------------------------------------------------------------------------------------------------------------------------------------------------------------------------------------------------------------------------------------------------------------------------------------------------------------------------------------------------------------------------------------------------------------------------------------------------------------------------------------------------------------------------------------------------------------------------------------------------------------------------------------------------------------------------------------------------------------------------------------------------------------------------------------------------------------------------------------------------------------------------------------------------------------------------------------------------------------------------------------------------------------------------------------------|
| 50 | <a href="#">Glutamatergic synapse</a>                | <p>CL1069.Contig1_All, CL1069.Contig2_All, CL1069.Contig3_All, CL1069.Contig4_All, CL1069.Contig5_All, CL1069.Contig6_All, CL1069.Contig7_All, CL1069.Contig8_All, CL1452.Contig1_All, CL155.Contig1_All, CL155.Contig2_All, CL1675.Contig2_All, CL18.Contig1_All, CL199.Contig1_All, CL2182.Contig1_All, CL2182.Contig3_All, CL2182.Contig4_All, CL2432.Contig2_All, CL2930.Contig5_All, CL3118.Contig1_All, CL3118.Contig2_All, CL3283.Contig1_All, CL3562.Contig6_All, CL3886.Contig1_All, CL3886.Contig2_All, CL3886.Contig3_All, CL3886.Contig4_All, CL39.Contig1_All, CL39.Contig2_All, CL39.Contig3_All, CL39.Contig4_All, CL4005.Contig2_All, CL4005.Contig3_All, CL4262.Contig2_All, CL440.Contig3_All, CL440.Contig5_All, CL440.Contig6_All, CL4521.Contig1_All, CL4521.Contig2_All, CL4521.Contig3_All, CL4521.Contig5_All, CL4923.Contig2_All, CL5064.Contig2_All, CL5098.Contig2_All, CL5310.Contig2_All, CL5391.Contig1_All, CL5391.Contig2_All, CL5399.Contig1_All, CL5399.Contig2_All, CL567.Contig4_All, CL691.Contig1_All, CL860.Contig10_All, CL860.Contig8_All, CL860.Contig9_All, CL870.Contig4_All, CL870.Contig8_All, CL870.Contig9_All, CL940.Contig3_All, CL940.Contig5_All, Unigene10058_All, Unigene10412_All, Unigene10909_All, Unigene10910_All, Unigene11915_All, Unigene12110_All, Unigene12470_All, Unigene13853_All, Unigene1417_All, Unigene1743_All, Unigene176_All, Unigene18234_All, Unigene18690_All, Unigene18898_All, Unigene18993_All, Unigene19148_All, Unigene1925_All, Unigene19288_All, Unigene2029_All, Unigene2196_All, Unigene2209_All, Unigene3029_All, Unigene3033_All, Unigene3034_All, Unigene3036_All, Unigene3037_All, Unigene3042_All, Unigene3655_All, Unigene3779_All, Unigene4053_All, Unigene4070_All, Unigene4112_All, Unigene4126_All, Unigene4532_All, Unigene4780_All, Unigene5074_All, Unigene5261_All, Unigene5521_All, Unigene555_All, Unigene6217_All, Unigene66242_All, Unigene661_All, Unigene69_All, Unigene7018_All, Unigene807_All, Unigene8091_All, Unigene8422_All, Unigene855_All, Unigene8621_All, Unigene9015_All, Unigene93_All, Unigene9437_All, Unigene9733_All</p> |
| 51 | <a href="#">Toxoplasmosis</a>                        | <p>CL1054.Contig1_All, CL1054.Contig2_All, CL1066.Contig1_All, CL1066.Contig2_All, CL1066.Contig3_All, CL1495.Contig1_All, CL1495.Contig2_All, CL1925.Contig1_All, CL199.Contig1_All, CL2129.Contig4_All, CL2165.Contig2_All, CL2331.Contig2_All, CL2331.Contig3_All, CL2432.Contig2_All, CL2686.Contig1_All, CL2686.Contig2_All, CL2882.Contig1_All, CL2882.Contig2_All, CL3554.Contig1_All, CL367.Contig1_All, CL367.Contig2_All, CL367.Contig3_All, CL39.Contig1_All, CL39.Contig2_All, CL39.Contig3_All, CL39.Contig4_All, CL470.Contig1_All, CL4923.Contig2_All, CL4966.Contig1_All, CL4992.Contig1_All, CL5048.Contig1_All, CL5115.Contig1_All, CL5256.Contig1_All, CL5256.Contig2_All, CL5256.Contig4_All, CL5310.Contig2_All, CL5352.Contig1_All, CL5352.Contig2_All, CL558.Contig1_All, CL558.Contig2_All, CL558.Contig4_All, CL695.Contig16_All, CL860.Contig10_All, CL860.Contig8_All, CL860.Contig9_All, Unigene10837_All, Unigene11724_All, Unigene12139_All, Unigene12188_All, Unigene12331_All, Unigene1326_All, Unigene15587_All, Unigene15658_All, Unigene15840_All, Unigene15855_All, Unigene15863_All, Unigene16093_All, Unigene1614_All, Unigene16538_All, Unigene16965_All, Unigene16966_All, Unigene1743_All, Unigene1757_All, Unigene17640_All, Unigene176_All, Unigene17702_All, Unigene17728_All, Unigene17929_All, Unigene18488_All, Unigene18496_All, Unigene18535_All, Unigene19237_All, Unigene19426_All, Unigene19840_All, Unigene20095_All, Unigene20226_All, Unigene2196_All, Unigene220_All, Unigene2503_All, Unigene2749_All, Unigene3029_All, Unigene3033_All, Unigene3034_All, Unigene3036_All, Unigene3037_All, Unigene3042_All, Unigene3123_All, Unigene3131_All, Unigene3945_All, Unigene4126_All, Unigene4207_All, Unigene4218_All, Unigene4581_All, Unigene5169_All, Unigene5521_All, Unigene6217_All, Unigene69_All, Unigene7220_All, Unigene8246_All, Unigene9971_All</p>                                                                                                                                                                                                                                |
| 52 | <a href="#">Retrograde endocannabinoid signaling</a> | <p>CL1069.Contig1_All, CL1069.Contig2_All, CL1069.Contig3_All, CL1069.Contig4_All, CL1069.Contig5_All, CL1069.Contig6_All, CL1069.Contig7_All, CL1069.Contig8_All, CL1425.Contig2_All, CL1425.Contig5_All, CL1452.Contig1_All, CL1675.Contig2_All, CL1707.Contig1_All, CL2161.Contig1_All, CL2161.Contig2_All, CL2182.Contig1_All, CL2182.Contig3_All, CL2182.Contig4_All, CL225.Contig1_All, CL225.Contig3_All, CL2703.Contig2_All, CL2726.Contig1_All, CL2735.Contig1_All, CL2878.Contig3_All, CL2930.Contig5_All, CL3166.Contig1_All, CL3507.Contig1_All, CL3643.Contig2_All, CL3643.Contig6_All, CL39.Contig1_All, CL39.Contig2_All, CL39.Contig3_All, CL39.Contig4_All, CL4005.Contig2_All, CL4005.Contig3_All, CL4205.Contig1_All, CL4205.Contig2_All, CL4262.Contig2_All, CL440.Contig3_All, CL440.Contig5_All, CL440.Contig6_All, CL4600.Contig2_All, CL4923.Contig2_All, CL4966.Contig1_All, CL5098.Contig2_All, CL5105.Contig1_All, CL5105.Contig2_All, CL5115.Contig1_All, CL5288.Contig2_All, CL5391.Contig1_All, CL5391.Contig2_All, CL5399.Contig1_All, CL5399.Contig2_All, CL662.Contig1_All, CL677.Contig2_All, CL679.Contig1_All, CL679.Contig2_All, CL691.Contig1_All, CL847.Contig3_All, CL894.Contig1_All, CL90.Contig1_All, CL90.Contig2_All, CL940.Contig3_All, CL940.Contig5_All, CL973.Contig1_All, Unigene1044_All, Unigene10931_All, Unigene11615_All, Unigene12110_All, Unigene12433_All, Unigene12535_All, Unigene13612_All, Unigene16890_All, Unigene1743_All, Unigene1766_All, Unigene176_All, Unigene17896_All, Unigene18898_All, Unigene18993_All, Unigene1925_All, Unigene19288_All, Unigene2029_All, Unigene2032_All, Unigene2196_All, Unigene2209_All, Unigene220_All, Unigene3134_All, Unigene3779_All, Unigene4053_All, Unigene4070_All, Unigene4112_All, Unigene4126_All, Unigene4780_All, Unigene5433_All, Unigene5521_All, Unigene6134_All, Unigene6217_All, Unigene66242_All, Unigene68_All, Unigene69_All, Unigene8071_All, Unigene807_All, Unigene8170_All, Unigene8422_All, Unigene8621_All, Unigene8993_All, Unigene9060_All, Unigene9167_All, Unigene93_All, Unigene9437_All, Unigene9733_All</p>     |

|    |                                                                        |                                                                                                                                                                                                                                                                                                                                                                                                                                                                                                                                                                                                                                                                                                                                                                                                                                                                                                                                                                                                                                                                                                                                                                                                                                                                                                                                                                                                                                                                                                                                                                                                                                                                                                                                                                                                                                                                                                                                                                                                                                                                                                                                                                                                                                                                                                                                                                                                                                                                                                                                                                                                                                                                                                                                                                                                                                                                                                                                                                                                                                                                                                                                                                                                                                                                                                                                                                                                                                                                                                                                                                                                                                                                                                                                                                                                                                                                                                                                                                                                                                                                                                                                                                                                                                                                                                                       |
|----|------------------------------------------------------------------------|-----------------------------------------------------------------------------------------------------------------------------------------------------------------------------------------------------------------------------------------------------------------------------------------------------------------------------------------------------------------------------------------------------------------------------------------------------------------------------------------------------------------------------------------------------------------------------------------------------------------------------------------------------------------------------------------------------------------------------------------------------------------------------------------------------------------------------------------------------------------------------------------------------------------------------------------------------------------------------------------------------------------------------------------------------------------------------------------------------------------------------------------------------------------------------------------------------------------------------------------------------------------------------------------------------------------------------------------------------------------------------------------------------------------------------------------------------------------------------------------------------------------------------------------------------------------------------------------------------------------------------------------------------------------------------------------------------------------------------------------------------------------------------------------------------------------------------------------------------------------------------------------------------------------------------------------------------------------------------------------------------------------------------------------------------------------------------------------------------------------------------------------------------------------------------------------------------------------------------------------------------------------------------------------------------------------------------------------------------------------------------------------------------------------------------------------------------------------------------------------------------------------------------------------------------------------------------------------------------------------------------------------------------------------------------------------------------------------------------------------------------------------------------------------------------------------------------------------------------------------------------------------------------------------------------------------------------------------------------------------------------------------------------------------------------------------------------------------------------------------------------------------------------------------------------------------------------------------------------------------------------------------------------------------------------------------------------------------------------------------------------------------------------------------------------------------------------------------------------------------------------------------------------------------------------------------------------------------------------------------------------------------------------------------------------------------------------------------------------------------------------------------------------------------------------------------------------------------------------------------------------------------------------------------------------------------------------------------------------------------------------------------------------------------------------------------------------------------------------------------------------------------------------------------------------------------------------------------------------------------------------------------------------------------------------------------------|
| 53 | <a href="#">Arrhythmogenic right ventricular cardiomyopathy (ARVC)</a> | CL1075.Contig2_All, CL1075.Contig3_All, CL1079.Contig4_All, CL1087.Contig2_All, CL1087.Contig3_All, CL1355.Contig1_All, CL1503.Contig3_All, CL1503.Contig4_All, CL1503.Contig5_All, CL156.Contig1_All, CL156.Contig3_All, CL156.Contig4_All, CL1803.Contig1_All, CL2034.Contig1_All, CL2034.Contig2_All, CL2331.Contig2_All, CL2331.Contig3_All, CL2517.Contig4_All, CL3436.Contig1_All, CL3436.Contig4_All, CL3436.Contig9_All, CL3442.Contig1_All, CL3554.Contig1_All, CL470.Contig1_All, CL4992.Contig1_All, CL531.Contig1_All, CL5352.Contig1_All, CL5352.Contig2_All, CL5468.Contig3_All, CL642.Contig1_All, CL642.Contig2_All, CL703.Contig2_All, CL703.Contig3_All, CL703.Contig5_All, CL703.Contig6_All, CL923.Contig3_All, Unigene10040_All, Unigene10471_All, Unigene11597_All, Unigene11598_All, Unigene11599_All, Unigene12627_All, Unigene12684_All, Unigene13092_All, Unigene136_All, Unigene15824_All, Unigene18598_All, Unigene18873_All, Unigene2032_All, Unigene2503_All, Unigene2741_All, Unigene278_All, Unigene3187_All, Unigene3945_All, Unigene4207_All, Unigene5727_All, Unigene7096_All, Unigene777_All, Unigene783_All, Unigene8621_All, Unigene9042_All, Unigene9062_All, Unigene9740_All                                                                                                                                                                                                                                                                                                                                                                                                                                                                                                                                                                                                                                                                                                                                                                                                                                                                                                                                                                                                                                                                                                                                                                                                                                                                                                                                                                                                                                                                                                                                                                                                                                                                                                                                                                                                                                                                                                                                                                                                                                                                                                                                                                                                                                                                                                                                                                                                                                                                                                                                                                                                                                                                                                                                                                                                                                                                                                                                                                                                                                                                                                  |
| 54 | <a href="#">Type I diabetes mellitus</a>                               | CL1599.Contig1_All, CL1599.Contig2_All, Unigene10337_All, Unigene10749_All, Unigene11919_All, Unigene20260_All, Unigene6768_All, Unigene9726_All                                                                                                                                                                                                                                                                                                                                                                                                                                                                                                                                                                                                                                                                                                                                                                                                                                                                                                                                                                                                                                                                                                                                                                                                                                                                                                                                                                                                                                                                                                                                                                                                                                                                                                                                                                                                                                                                                                                                                                                                                                                                                                                                                                                                                                                                                                                                                                                                                                                                                                                                                                                                                                                                                                                                                                                                                                                                                                                                                                                                                                                                                                                                                                                                                                                                                                                                                                                                                                                                                                                                                                                                                                                                                                                                                                                                                                                                                                                                                                                                                                                                                                                                                                      |
| 55 | <a href="#">Neuroactive ligand-receptor interaction</a>                | CL1085.Contig2_All, CL1200.Contig2_All, CL1200.Contig4_All, CL1203.Contig5_All, CL1419.Contig7_All, CL1469.Contig1_All, CL1469.Contig2_All, CL1525.Contig14_All, CL1525.Contig15_All, CL1525.Contig9_All, CL18.Contig1_All, CL1849.Contig1_All, CL1849.Contig2_All, CL1849.Contig3_All, CL1849.Contig4_All, CL187.Contig3_All, CL1887.Contig1_All, CL1887.Contig2_All, CL1887.Contig3_All, CL191.Contig1_All, CL191.Contig2_All, CL1920.Contig1_All, CL1920.Contig2_All, CL2016.Contig1_All, CL2018.Contig3_All, CL2055.Contig1_All, CL2055.Contig3_All, CL214.Contig3_All, CL2146.Contig4_All, CL2161.Contig1_All, CL2161.Contig2_All, CL2213.Contig1_All, CL2213.Contig2_All, CL2213.Contig4_All, CL225.Contig1_All, CL225.Contig2_All, CL225.Contig3_All, CL2276.Contig1_All, CL2276.Contig2_All, CL2703.Contig2_All, CL2734.Contig1_All, CL2735.Contig1_All, CL2762.Contig4_All, CL2992.Contig1_All, CL2993.Contig1_All, CL3007.Contig2_All, CL3166.Contig1_All, CL3271.Contig1_All, CL3271.Contig2_All, CL336.Contig1_All, CL336.Contig2_All, CL3362.Contig1_All, CL3362.Contig2_All, CL3481.Contig1_All, CL3507.Contig1_All, CL3545.Contig1_All, CL3545.Contig2_All, CL3571.Contig1_All, CL3571.Contig2_All, CL3575.Contig1_All, CL3575.Contig2_All, CL3597.Contig1_All, CL3597.Contig2_All, CL3676.Contig1_All, CL3679.Contig2_All, CL393.Contig2_All, CL3948.Contig1_All, CL3948.Contig3_All, CL398.Contig4_All, CL4004.Contig1_All, CL4004.Contig2_All, CL4065.Contig1_All, CL4169.Contig1_All, CL4362.Contig1_All, CL4362.Contig2_All, CL4442.Contig1_All, CL4473.Contig1_All, CL4473.Contig2_All, CL4473.Contig3_All, CL4533.Contig1_All, CL4645.Contig1_All, CL467.Contig1_All, CL467.Contig2_All, CL4684.Contig1_All, CL4699.Contig1_All, CL4727.Contig2_All, CL4754.Contig1_All, CL4786.Contig1_All, CL4919.Contig1_All, CL4928.Contig1_All, CL4928.Contig2_All, CL4997.Contig1_All, CL4997.Contig2_All, CL5098.Contig2_All, CL5105.Contig1_All, CL5105.Contig2_All, CL526.Contig2_All, CL5287.Contig2_All, CL5406.Contig1_All, CL5458.Contig5_All, CL5458.Contig7_All, CL584.Contig17_All, CL595.Contig6_All, CL600.Contig1_All, CL600.Contig2_All, CL600.Contig3_All, CL600.Contig4_All, CL600.Contig6_All, CL622.Contig1_All, CL622.Contig2_All, CL622.Contig4_All, CL662.Contig1_All, CL763.Contig1_All, CL763.Contig2_All, CL801.Contig1_All, CL801.Contig2_All, CL801.Contig3_All, CL801.Contig4_All, CL801.Contig7_All, CL801.Contig8_All, CL801.Contig9_All, CL847.Contig3_All, CL870.Contig4_All, CL870.Contig8_All, CL870.Contig9_All, CL894.Contig1_All, CL894.Contig2_All, CL973.Contig1_All, CL982.Contig4_All, Unigene1007_All, Unigene10763_All, Unigene1099_All, Unigene1111_All, Unigene11357_All, Unigene11615_All, Unigene11660_All, Unigene1186_All, Unigene11915_All, Unigene12398_All, Unigene12535_All, Unigene12722_All, Unigene13612_All, Unigene1417_All, Unigene1427_All, Unigene142_All, Unigene15194_All, Unigene15195_All, Unigene16349_All, Unigene1671_All, Unigene17380_All, Unigene1766_All, Unigene17812_All, Unigene17864_All, Unigene17896_All, Unigene17987_All, Unigene18002_All, Unigene18066_All, Unigene18199_All, Unigene18431_All, Unigene18653_All, Unigene18654_All, Unigene18672_All, Unigene18690_All, Unigene19148_All, Unigene19288_All, Unigene19782_All, Unigene197_All, Unigene20226_All, Unigene2027_All, Unigene2058_All, Unigene2061_All, Unigene2139_All, Unigene213_All, Unigene2172_All, Unigene217_All, Unigene2616_All, Unigene2701_All, Unigene29_All, Unigene3126_All, Unigene3283_All, Unigene3357_All, Unigene3748_All, Unigene3967_All, Unigene4073_All, Unigene4092_All, Unigene4129_All, Unigene5045_All, Unigene5066_All, Unigene5074_All, Unigene5128_All, Unigene5147_All, Unigene5158_All, Unigene5213_All, Unigene5261_All, Unigene5273_All, Unigene5877_All, Unigene590_All, Unigene6242_All, Unigene661_All, Unigene68_All, Unigene6972_All, Unigene7020_All, Unigene7042_All, Unigene7110_All, Unigene7217_All, Unigene7265_All, Unigene75_All, Unigene8019_All, Unigene8038_All, Unigene8052_All, Unigene807_All, Unigene8091_All, Unigene8210_All, Unigene8331_All, Unigene84_All, Unigene8770_All, Unigene8848_All, Unigene8993_All, Unigene9036_All, Unigene9037_All, Unigene9117_All, Unigene9167_All, Unigene9205_All |

|    |                              |                                                                                                                                                                                                                                                                                                                                                                                                                                                                                                                                                                                                                                                                                                                                                                                                                                                                                                                                                                                                                                                                                                                                                                                                                                                                                                                                                                                                                                                                                                                                                                                                                                                                                                                                                                                                                                                                                                                                                                                                                                                                                                                                                                                                                                                                                                                                                                                                                                                                                                                                                                                                                                                                                                                                                                                                                                                                                                                                                                                                            |
|----|------------------------------|------------------------------------------------------------------------------------------------------------------------------------------------------------------------------------------------------------------------------------------------------------------------------------------------------------------------------------------------------------------------------------------------------------------------------------------------------------------------------------------------------------------------------------------------------------------------------------------------------------------------------------------------------------------------------------------------------------------------------------------------------------------------------------------------------------------------------------------------------------------------------------------------------------------------------------------------------------------------------------------------------------------------------------------------------------------------------------------------------------------------------------------------------------------------------------------------------------------------------------------------------------------------------------------------------------------------------------------------------------------------------------------------------------------------------------------------------------------------------------------------------------------------------------------------------------------------------------------------------------------------------------------------------------------------------------------------------------------------------------------------------------------------------------------------------------------------------------------------------------------------------------------------------------------------------------------------------------------------------------------------------------------------------------------------------------------------------------------------------------------------------------------------------------------------------------------------------------------------------------------------------------------------------------------------------------------------------------------------------------------------------------------------------------------------------------------------------------------------------------------------------------------------------------------------------------------------------------------------------------------------------------------------------------------------------------------------------------------------------------------------------------------------------------------------------------------------------------------------------------------------------------------------------------------------------------------------------------------------------------------------------------|
| 56 | <a href="#">Influenza A</a>  | CL1054.Contig1_All, CL1054.Contig2_All, CL1066.Contig1_All, CL1066.Contig2_All, CL1066.Contig3_All, CL107.Contig3_All, CL1355.Contig1_All, CL156.Contig1_All, CL156.Contig3_All, CL156.Contig4_All, CL1803.Contig1_All, CL1843.Contig3_All, CL1925.Contig1_All, CL1966.Contig2_All, CL1991.Contig2_All, CL1991.Contig3_All, CL1991.Contig4_All, CL2049.Contig1_All, CL2049.Contig3_All, CL2129.Contig4_All, CL2165.Contig2_All, CL2170.Contig2_All, CL2170.Contig5_All, CL2182.Contig1_All, CL2182.Contig3_All, CL2182.Contig4_All, CL2213.Contig1_All, CL2213.Contig2_All, CL2213.Contig4_All, CL2229.Contig1_All, CL2306.Contig2_All, CL2420.Contig1_All, CL2420.Contig2_All, CL2490.Contig1_All, CL2686.Contig1_All, CL2686.Contig2_All, CL2761.Contig1_All, CL2761.Contig2_All, CL2789.Contig2_All, CL2882.Contig1_All, CL2882.Contig2_All, CL345.Contig1_All, CL367.Contig1_All, CL367.Contig2_All, CL367.Contig3_All, CL3798.Contig3_All, CL39.Contig1_All, CL39.Contig2_All, CL39.Contig3_All, CL39.Contig4_All, CL4010.Contig1_All, CL4010.Contig2_All, CL4105.Contig2_All, CL4155.Contig1_All, CL4604.Contig1_All, CL4604.Contig2_All, CL4736.Contig1_All, CL4736.Contig2_All, CL475.Contig4_All, CL4787.Contig1_All, CL4815.Contig1_All, CL4815.Contig2_All, CL4874.Contig1_All, CL4966.Contig1_All, CL5051.Contig2_All, CL5115.Contig1_All, CL5256.Contig1_All, CL5256.Contig2_All, CL5256.Contig4_All, CL5391.Contig1_All, CL5391.Contig2_All, CL5468.Contig3_All, CL558.Contig1_All, CL558.Contig2_All, CL558.Contig4_All, CL560.Contig1_All, CL560.Contig2_All, CL560.Contig4_All, CL695.Contig16_All, CL910.Contig1_All, CL910.Contig6_All, CL910.Contig7_All, CL910.Contig9_All, CL940.Contig3_All, CL940.Contig5_All, Unigene10234_All, Unigene10817_All, Unigene10833_All, Unigene10837_All, Unigene1084_All, Unigene11422_All, Unigene11597_All, Unigene11598_All, Unigene11599_All, Unigene11660_All, Unigene11724_All, Unigene11922_All, Unigene12006_All, Unigene12088_All, Unigene12139_All, Unigene12188_All, Unigene12259_All, Unigene1247_All, Unigene12608_All, Unigene12618_All, Unigene12669_All, Unigene12684_All, Unigene13010_All, Unigene13092_All, Unigene1326_All, Unigene13541_All, Unigene14208_All, Unigene1459_All, Unigene1479_All, Unigene15587_All, Unigene15863_All, Unigene16093_All, Unigene17046_All, Unigene17380_All, Unigene1757_All, Unigene17702_All, Unigene18002_All, Unigene18278_All, Unigene18284_All, Unigene18535_All, Unigene18598_All, Unigene18672_All, Unigene18898_All, Unigene19116_All, Unigene20095_All, Unigene220_All, Unigene236_All, Unigene247_All, Unigene2741_All, Unigene2749_All, Unigene278_All, Unigene3415_All, Unigene453_All, Unigene4581_All, Unigene54_All, Unigene5781_All, Unigene5877_All, Unigene590_All, Unigene6648_All, Unigene6977_All, Unigene7286_All, Unigene7297_All, Unigene7702_All, Unigene8174_All, Unigene8246_All, Unigene8605_All, Unigene8784_All, Unigene8848_All, Unigene9971_All, Unigene9989_All |
| 57 | <a href="#">Gap junction</a> | CL126.Contig2_All, CL1452.Contig1_All, CL1548.Contig2_All, CL1548.Contig3_All, CL1559.Contig1_All, CL1807.Contig1_All, CL1807.Contig2_All, CL2182.Contig1_All, CL2182.Contig3_All, CL2182.Contig4_All, CL2930.Contig5_All, CL3311.Contig1_All, CL3311.Contig2_All, CL39.Contig1_All, CL39.Contig2_All, CL39.Contig3_All, CL39.Contig4_All, CL3948.Contig3_All, CL4005.Contig2_All, CL4005.Contig3_All, CL4181.Contig1_All, CL4181.Contig4_All, CL4262.Contig2_All, CL440.Contig3_All, CL440.Contig5_All, CL440.Contig6_All, CL4439.Contig2_All, CL4684.Contig1_All, CL4776.Contig1_All, CL4776.Contig2_All, CL4787.Contig1_All, CL5098.Contig2_All, CL5149.Contig1_All, CL5149.Contig2_All, CL5186.Contig2_All, CL5207.Contig2_All, CL5391.Contig1_All, CL5391.Contig2_All, CL5399.Contig1_All, CL5399.Contig2_All, CL621.Contig2_All, CL621.Contig4_All, CL621.Contig5_All, CL648.Contig2_All, CL691.Contig1_All, CL940.Contig3_All, CL940.Contig5_All, Unigene10058_All, Unigene1007_All, Unigene10125_All, Unigene10126_All, Unigene10128_All, Unigene1016_All, Unigene10174_All, Unigene1017_All, Unigene1050_All, Unigene1099_All, Unigene11121_All, Unigene11130_All, Unigene11369_All, Unigene11395_All, Unigene11730_All, Unigene11992_All, Unigene12161_All, Unigene12203_All, Unigene12671_All, Unigene13421_All, Unigene15176_All, Unigene15308_All, Unigene1671_All, Unigene17987_All, Unigene18898_All, Unigene18993_All, Unigene19288_All, Unigene19920_All, Unigene2029_All, Unigene2209_All, Unigene2795_All, Unigene3715_All, Unigene3779_All, Unigene3861_All, Unigene4053_All, Unigene4070_All, Unigene4112_All, Unigene4133_All, Unigene420_All, Unigene4532_All, Unigene4765_All, Unigene4783_All, Unigene5448_All, Unigene5521_All, Unigene5896_All, Unigene615_All, Unigene6217_All, Unigene6242_All, Unigene699_All, Unigene7767_All, Unigene8046_All, Unigene807_All, Unigene8205_All, Unigene8422_All, Unigene9217_All, Unigene93_All, Unigene9437_All, Unigene9604_All, Unigene9733_All, Unigene9972_All, Unigene9973_All, Unigene9984_All                                                                                                                                                                                                                                                                                                                                                                                                                                                                                                                                                                                                                                                                                                                                                                                                                                                                                                                                      |
| 58 | <a href="#">Shigellosis</a>  | CL1099.Contig3_All, CL1355.Contig1_All, CL1535.Contig3_All, CL156.Contig1_All, CL156.Contig3_All, CL156.Contig4_All, CL1723.Contig1_All, CL1723.Contig2_All, CL1723.Contig7_All, CL1803.Contig1_All, CL2.Contig1_All, CL2085.Contig1_All, CL2224.Contig2_All, CL2224.Contig3_All, CL2224.Contig4_All, CL2375.Contig2_All, CL271.Contig2_All, CL2764.Contig2_All, CL2833.Contig1_All, CL2838.Contig1_All, CL2838.Contig2_All, CL2838.Contig4_All, CL2975.Contig2_All, CL3027.Contig3_All, CL3114.Contig2_All, CL3315.Contig3_All, CL3315.Contig4_All, CL3510.Contig3_All, CL3823.Contig1_All, CL3823.Contig2_All, CL402.Contig1_All, CL4088.Contig2_All, CL4098.Contig3_All, CL4130.Contig1_All, CL4203.Contig3_All, CL4479.Contig2_All, CL4479.Contig3_All, CL4479.Contig5_All, CL4738.Contig1_All, CL4966.Contig1_All, CL5115.Contig1_All, CL5162.Contig1_All, CL5162.Contig2_All, CL5468.Contig3_All, Unigene10097_All, Unigene10448_All, Unigene10998_All, Unigene11082_All, Unigene11372_All, Unigene11459_All, Unigene11521_All, Unigene11597_All, Unigene11598_All, Unigene11599_All, Unigene11677_All, Unigene12201_All, Unigene12603_All, Unigene12684_All, Unigene12711_All, Unigene13036_All, Unigene13092_All, Unigene13147_All, Unigene1447_All, Unigene1496_All, Unigene16840_All, Unigene16963_All, Unigene1757_All, Unigene18598_All, Unigene18644_All, Unigene198_All, Unigene220_All, Unigene2741_All, Unigene278_All, Unigene3482_All, Unigene3945_All, Unigene4207_All, Unigene5303_All, Unigene5873_All, Unigene6014_All, Unigene6029_All, Unigene6994_All, Unigene7058_All, Unigene7063_All, Unigene7983_All, Unigene798_All, Unigene8184_All, Unigene9785_All, Unigene9787_All, Unigene9902_All, Unigene9947_All                                                                                                                                                                                                                                                                                                                                                                                                                                                                                                                                                                                                                                                                                                                                                                                                                                                                                                                                                                                                                                                                                                                                                                                                                                                                     |

|    |                                                  |                                                                                                                                                                                                                                                                                                                                                                                                                                                                                                                                                                                                                                                                                                                                                                                                                                                                                                                                                                                                                                                                                                                                                                                                                                                                                                                                                                                                                                                                                                                                                                                                                                                                                                                                                                                                                                                                                                                                                                                                                                                                                                                                                                                                                                               |
|----|--------------------------------------------------|-----------------------------------------------------------------------------------------------------------------------------------------------------------------------------------------------------------------------------------------------------------------------------------------------------------------------------------------------------------------------------------------------------------------------------------------------------------------------------------------------------------------------------------------------------------------------------------------------------------------------------------------------------------------------------------------------------------------------------------------------------------------------------------------------------------------------------------------------------------------------------------------------------------------------------------------------------------------------------------------------------------------------------------------------------------------------------------------------------------------------------------------------------------------------------------------------------------------------------------------------------------------------------------------------------------------------------------------------------------------------------------------------------------------------------------------------------------------------------------------------------------------------------------------------------------------------------------------------------------------------------------------------------------------------------------------------------------------------------------------------------------------------------------------------------------------------------------------------------------------------------------------------------------------------------------------------------------------------------------------------------------------------------------------------------------------------------------------------------------------------------------------------------------------------------------------------------------------------------------------------|
| 59 | <a href="#">ErbB signaling pathway</a>           | <p>CL1066.Contig1_All, CL1066.Contig2_All, CL1066.Contig3_All, CL1548.Contig2_All, CL1548.Contig3_All, CL1807.Contig1_All, CL1807.Contig2_All, CL1843.Contig3_All, CL1874.Contig2_All, CL1953.Contig1_All, CL1966.Contig2_All, CL2038.Contig1_All, CL2038.Contig7_All, CL2066.Contig1_All, CL2182.Contig1_All, CL2182.Contig3_All, CL2182.Contig4_All, CL2722.Contig1_All, CL2977.Contig1_All, CL2977.Contig2_All, CL3632.Contig2_All, CL3632.Contig3_All, CL367.Contig1_All, CL367.Contig2_All, CL367.Contig3_All, CL3796.Contig2_All, CL3796.Contig3_All, CL39.Contig1_All, CL39.Contig2_All, CL39.Contig3_All, CL39.Contig4_All, CL3979.Contig1_All, CL3979.Contig2_All, CL400.Contig1_All, CL400.Contig2_All, CL44.Contig10_All, CL44.Contig12_All, CL44.Contig13_All, CL44.Contig16_All, CL44.Contig17_All, CL44.Contig18_All, CL44.Contig19_All, CL44.Contig1_All, CL44.Contig22_All, CL44.Contig23_All, CL44.Contig2_All, CL44.Contig3_All, CL44.Contig4_All, CL44.Contig5_All, CL44.Contig6_All, CL44.Contig8_All, CL44.Contig9_All, CL4439.Contig2_All, CL4559.Contig2_All, CL4559.Contig3_All, CL4736.Contig1_All, CL4736.Contig2_All, CL4787.Contig1_All, CL4815.Contig1_All, CL4815.Contig2_All, CL5005.Contig1_All, CL5005.Contig2_All, CL5115.Contig1_All, CL5391.Contig1_All, CL5391.Contig2_All, CL5469.Contig2_All, CL695.Contig16_All, CL748.Contig1_All, CL748.Contig3_All, CL940.Contig3_All, CL940.Contig5_All, Unigene10174_All, Unigene11446_All, Unigene11922_All, Unigene12671_All, Unigene13036_All, Unigene1479_All, Unigene18898_All, Unigene198_All, Unigene220_All, Unigene236_All, Unigene247_All, Unigene2749_All, Unigene2956_All, Unigene3168_All, Unigene4081_All, Unigene6101_All, Unigene6977_All, Unigene699_All, Unigene7016_All, Unigene7297_All, Unigene7745_All, Unigene7983_All, Unigene8046_All, Unigene8725_All, Unigene8747_All, Unigene8784_All, Unigene9719_All, Unigene9921_All</p>                                                                                                                                                                                                                                                                                                          |
| 60 | <a href="#">Fc gamma R-mediated phagocytosis</a> | <p>CL1066.Contig1_All, CL1066.Contig2_All, CL1066.Contig3_All, CL1535.Contig3_All, CL1723.Contig1_All, CL1723.Contig2_All, CL1723.Contig7_All, CL1954.Contig1_All, CL1954.Contig2_All, CL199.Contig1_All, CL2182.Contig1_All, CL2182.Contig3_All, CL2182.Contig4_All, CL2375.Contig2_All, CL2432.Contig2_All, CL271.Contig2_All, CL2975.Contig2_All, CL3027.Contig3_All, CL3047.Contig1_All, CL3047.Contig2_All, CL309.Contig2_All, CL309.Contig3_All, CL309.Contig4_All, CL3114.Contig2_All, CL3315.Contig3_All, CL3315.Contig4_All, CL344.Contig1_All, CL3510.Contig3_All, CL367.Contig1_All, CL367.Contig2_All, CL367.Contig3_All, CL39.Contig1_All, CL39.Contig2_All, CL39.Contig3_All, CL39.Contig4_All, CL3979.Contig1_All, CL3979.Contig2_All, CL399.Contig10_All, CL399.Contig1_All, CL399.Contig2_All, CL399.Contig3_All, CL399.Contig4_All, CL399.Contig5_All, CL399.Contig6_All, CL399.Contig7_All, CL399.Contig8_All, CL399.Contig9_All, CL4088.Contig2_All, CL4130.Contig1_All, CL4541.Contig1_All, CL4541.Contig2_All, CL4787.Contig1_All, CL4845.Contig1_All, CL4855.Contig1_All, CL4855.Contig2_All, CL495.Contig11_All, CL495.Contig1_All, CL495.Contig3_All, CL495.Contig4_All, CL495.Contig5_All, CL495.Contig6_All, CL5017.Contig2_All, CL5310.Contig2_All, CL5391.Contig1_All, CL5391.Contig2_All, CL5469.Contig2_All, CL695.Contig16_All, CL860.Contig10_All, CL860.Contig8_All, CL860.Contig9_All, CL940.Contig3_All, CL940.Contig5_All, Unigene10097_All, Unigene10448_All, Unigene10775_All, Unigene10998_All, Unigene11052_All, Unigene11082_All, Unigene11459_All, Unigene11521_All, Unigene11628_All, Unigene12201_All, Unigene12301_All, Unigene12603_All, Unigene13036_All, Unigene1447_All, Unigene16840_All, Unigene16963_All, Unigene18898_All, Unigene2749_All, Unigene2956_All, Unigene3029_All, Unigene3033_All, Unigene3034_All, Unigene3036_All, Unigene3037_All, Unigene3042_All, Unigene3482_All, Unigene4810_All, Unigene5303_All, Unigene5873_All, Unigene6014_All, Unigene6029_All, Unigene7018_All, Unigene7348_All, Unigene7745_All, Unigene7936_All, Unigene8056_All, Unigene8184_All, Unigene8585_All, Unigene9719_All, Unigene9785_All, Unigene9787_All, Unigene9902_All, Unigene9947_All</p> |
| 61 | <a href="#">Synaptic vesicle cycle</a>           | <p>CL1069.Contig1_All, CL1069.Contig2_All, CL1069.Contig3_All, CL1069.Contig4_All, CL1069.Contig5_All, CL1069.Contig6_All, CL1069.Contig7_All, CL1069.Contig8_All, CL182.Contig10_All, CL182.Contig11_All, CL182.Contig1_All, CL182.Contig2_All, CL182.Contig3_All, CL182.Contig4_All, CL182.Contig5_All, CL182.Contig6_All, CL182.Contig7_All, CL182.Contig8_All, CL182.Contig9_All, CL2019.Contig1_All, CL2019.Contig2_All, CL2068.Contig5_All, CL2108.Contig1_All, CL2108.Contig4_All, CL2150.Contig3_All, CL2382.Contig4_All, CL2450.Contig1_All, CL2450.Contig2_All, CL2634.Contig1_All, CL2634.Contig2_All, CL3091.Contig1_All, CL3091.Contig2_All, CL3091.Contig3_All, CL3091.Contig4_All, CL3200.Contig2_All, CL3226.Contig1_All, CL3226.Contig2_All, CL3286.Contig1_All, CL399.Contig10_All, CL399.Contig1_All, CL399.Contig2_All, CL399.Contig3_All, CL399.Contig4_All, CL399.Contig5_All, CL399.Contig6_All, CL399.Contig7_All, CL399.Contig8_All, CL399.Contig9_All, CL4001.Contig1_All, CL4001.Contig2_All, CL4087.Contig2_All, CL4090.Contig2_All, CL4197.Contig2_All, CL42.Contig2_All, CL4459.Contig1_All, CL4541.Contig1_All, CL4541.Contig2_All, CL4644.Contig2_All, CL4746.Contig1_All, CL495.Contig11_All, CL495.Contig1_All, CL495.Contig3_All, CL495.Contig4_All, CL495.Contig5_All, CL495.Contig6_All, CL677.Contig2_All, CL679.Contig1_All, CL679.Contig2_All, Unigene10026_All, Unigene10078_All, Unigene1044_All, Unigene10483_All, Unigene10931_All, Unigene11240_All, Unigene11899_All, Unigene1189_All, Unigene11973_All, Unigene12028_All, Unigene12168_All, Unigene12209_All, Unigene12302_All, Unigene12423_All, Unigene12433_All, Unigene12923_All, Unigene13225_All, Unigene13508_All, Unigene13589_All, Unigene13978_All, Unigene15969_All, Unigene16890_All, Unigene1741_All, Unigene17602_All, Unigene18707_All, Unigene2032_All, Unigene2193_All, Unigene3137_All, Unigene3351_All, Unigene3730_All, Unigene4299_All, Unigene5360_All, Unigene5716_All, Unigene6005_All, Unigene6697_All, Unigene6702_All, Unigene7298_All, Unigene7751_All, Unigene8071_All, Unigene8170_All, Unigene9216_All, Unigene925_All</p>                                                                                      |

62 [mRNA surveillance pathway](#)

CL1477.Contig8\_All, CL1563.Contig2\_All, CL1637.Contig1\_All, CL1663.Contig2\_All, CL1740.Contig4\_All, CL1850.Contig1\_All, CL1850.Contig2\_All, CL2154.Contig1\_All, CL2154.Contig2\_All, CL2278.Contig1\_All, CL2278.Contig2\_All, CL2400.Contig5\_All, CL244.Contig2\_All, CL2496.Contig1\_All, CL2502.Contig2\_All, CL2502.Contig3\_All, CL2657.Contig2\_All, CL2719.Contig1\_All, CL2719.Contig2\_All, CL276.Contig3\_All, CL276.Contig7\_All, CL2761.Contig1\_All, CL2761.Contig2\_All, CL2873.Contig1\_All, CL2873.Contig2\_All, CL296.Contig4\_All, CL3057.Contig1\_All, CL3057.Contig2\_All, CL3221.Contig1\_All, CL3401.Contig2\_All, CL361.Contig1\_All, CL3616.Contig1\_All, CL3681.Contig1\_All, CL3681.Contig2\_All, CL3689.Contig2\_All, CL394.Contig1\_All, CL394.Contig2\_All, CL4002.Contig1\_All, CL4051.Contig1\_All, CL4127.Contig2\_All, CL4155.Contig1\_All, CL4295.Contig1\_All, CL4302.Contig1\_All, CL4302.Contig2\_All, CL4302.Contig3\_All, CL4302.Contig4\_All, CL4375.Contig2\_All, CL452.Contig2\_All, CL4667.Contig1\_All, CL4667.Contig3\_All, CL4794.Contig1\_All, CL4794.Contig3\_All, CL4884.Contig2\_All, CL4884.Contig4\_All, CL497.Contig1\_All, CL5067.Contig2\_All, CL5078.Contig12\_All, CL5096.Contig2\_All, CL5107.Contig1\_All, CL5107.Contig2\_All, CL5150.Contig1\_All, CL5150.Contig4\_All, CL5214.Contig1\_All, CL5214.Contig2\_All, CL5459.Contig1\_All, CL560.Contig1\_All, CL560.Contig2\_All, CL560.Contig4\_All, CL700.Contig1\_All, CL700.Contig2\_All, CL741.Contig2\_All, CL761.Contig1\_All, CL761.Contig2\_All, Unigene10053\_All, Unigene10154\_All, Unigene10242\_All, Unigene10357\_All, Unigene10528\_All, Unigene1055\_All, Unigene11025\_All, Unigene11092\_All, Unigene11099\_All, Unigene11459\_All, Unigene11478\_All, Unigene11479\_All, Unigene11623\_All, Unigene1168\_All, Unigene1172\_All, Unigene11807\_All, Unigene11939\_All, Unigene12047\_All, Unigene12088\_All, Unigene12124\_All, Unigene12294\_All, Unigene12299\_All, Unigene12322\_All, Unigene12410\_All, Unigene12414\_All, Unigene12464\_All, Unigene12608\_All, Unigene1260\_All, Unigene12618\_All, Unigene12669\_All, Unigene12798\_All, Unigene12866\_All, Unigene12949\_All, Unigene13010\_All, Unigene13030\_All, Unigene1313\_All, Unigene13265\_All, Unigene13432\_All, Unigene13541\_All, Unigene1512\_All, Unigene1768\_All, Unigene1792\_All, Unigene1941\_All, Unigene1975\_All, Unigene19925\_All, Unigene19947\_All, Unigene20230\_All, Unigene2203\_All, Unigene2233\_All, Unigene2255\_All, Unigene2682\_All, Unigene3415\_All, Unigene3554\_All, Unigene3814\_All, Unigene3991\_All, Unigene4022\_All, Unigene4106\_All, Unigene4251\_All, Unigene4571\_All, Unigene4749\_All, Unigene4777\_All, Unigene4935\_All, Unigene4954\_All, Unigene4970\_All, Unigene5067\_All, Unigene5092\_All, Unigene5177\_All, Unigene5303\_All, Unigene5361\_All, Unigene554\_All, Unigene6021\_All, Unigene6236\_All, Unigene63\_All, Unigene6587\_All, Unigene6655\_All, Unigene6681\_All, Unigene6704\_All, Unigene6739\_All, Unigene6746\_All, Unigene7270\_All, Unigene7646\_All, Unigene7704\_All, Unigene7743\_All, Unigene7759\_All, Unigene7764\_All, Unigene7776\_All, Unigene7981\_All, Unigene8119\_All, Unigene8228\_All, Unigene8235\_All, Unigene8686\_All, Unigene8943\_All, Unigene9252\_All, Unigene9710\_All, Unigene9742\_All, Unigene9904\_All

63 [Regulation of actin cytoskeleton](#)

CL1066.Contig1\_All, CL1066.Contig2\_All, CL1066.Contig3\_All, CL1068.Contig5\_All, CL1075.Contig3\_All, CL1099.Contig3\_All, CL1141.Contig2\_All, CL119.Contig10\_All, CL119.Contig11\_All, CL119.Contig3\_All, CL119.Contig8\_All, CL119.Contig9\_All, CL1355.Contig1\_All, CL147.Contig6\_All, CL1503.Contig3\_All, CL1503.Contig4\_All, CL1503.Contig5\_All, CL1535.Contig3\_All, CL1548.Contig2\_All, CL1548.Contig3\_All, CL156.Contig1\_All, CL156.Contig3\_All, CL156.Contig4\_All, CL1563.Contig2\_All, CL1564.Contig4\_All, CL1564.Contig5\_All, CL1687.Contig4\_All, CL1723.Contig1\_All, CL1723.Contig2\_All, CL1723.Contig7\_All, CL1803.Contig1\_All, CL1807.Contig1\_All, CL1807.Contig2\_All, CL1954.Contig1\_All, CL1954.Contig2\_All, CL2039.Contig1\_All, CL2061.Contig1\_All, CL2066.Contig1\_All, CL2224.Contig2\_All, CL2224.Contig3\_All, CL2224.Contig4\_All, CL2265.Contig1\_All, CL2265.Contig2\_All, CL2331.Contig2\_All, CL2331.Contig3\_All, CL2336.Contig1\_All, CL2375.Contig2\_All, CL244.Contig2\_All, CL2449.Contig1\_All, CL2449.Contig2\_All, CL2505.Contig3\_All, CL2505.Contig4\_All, CL254.Contig1\_All, CL263.Contig3\_All, CL263.Contig5\_All, CL271.Contig2\_All, CL2722.Contig1\_All, CL2748.Contig2\_All, CL2764.Contig2\_All, CL2788.Contig2\_All, CL2833.Contig1\_All, CL2833.Contig3\_All, CL2904.Contig1\_All, CL2904.Contig2\_All, CL2909.Contig1\_All, CL2909.Contig3\_All, CL2909.Contig4\_All, CL296.Contig16\_All, CL2975.Contig2\_All, CL3011.Contig1\_All, CL3027.Contig3\_All, CL3046.Contig1\_All, CL305.Contig2\_All, CL309.Contig2\_All, CL309.Contig3\_All, CL309.Contig4\_All, CL3092.Contig1\_All, CL3092.Contig2\_All, CL3114.Contig2\_All, CL3116.Contig2\_All, CL3260.Contig1\_All, CL3260.Contig2\_All, CL3260.Contig3\_All, CL3260.Contig4\_All, CL3260.Contig5\_All, CL3260.Contig7\_All, CL3294.Contig1\_All, CL3295.Contig1\_All, CL3297.Contig1\_All, CL3297.Contig2\_All, CL3315.Contig3\_All, CL3315.Contig4\_All, CL3347.Contig1\_All, CL3347.Contig2\_All, CL3500.Contig1\_All, CL3510.Contig3\_All, CL3525.Contig1\_All, CL3525.Contig2\_All, CL3543.Contig2\_All, CL3543.Contig3\_All, CL3543.Contig4\_All, CL358.Contig1\_All, CL367.Contig1\_All, CL367.Contig2\_All, CL367.Contig3\_All, CL3672.Contig4\_All, CL3689.Contig2\_All, CL369.Contig2\_All, CL3761.Contig1\_All, CL3823.Contig1\_All, CL3823.Contig2\_All, CL3825.Contig1\_All, CL3825.Contig2\_All, CL392.Contig1\_All, CL392.Contig2\_All, CL392.Contig3\_All, CL4002.Contig1\_All, CL4062.Contig2\_All, CL4069.Contig1\_All, CL4088.Contig1\_All, CL4088.Contig2\_All, CL4130.Contig1\_All, CL4187.Contig1\_All, CL4203.Contig3\_All, CL4216.Contig1\_All, CL4216.Contig2\_All, CL4250.Contig2\_All, CL4402.Contig1\_All, CL4439.Contig2\_All, CL4454.Contig3\_All, CL4596.Contig1\_All, CL4637.Contig1\_All, CL4699.Contig1\_All, CL4787.Contig1\_All, CL4862.Contig1\_All, CL4896.Contig1\_All, CL5017.Contig2\_All, CL503.Contig2\_All, CL503.Contig3\_All, CL503.Contig4\_All, CL503.Contig5\_All, CL503.Contig6\_All, CL503.Contig8\_All, CL5061.Contig2\_All, CL5162.Contig1\_All, CL5162.Contig2\_All, CL5246.Contig3\_All, CL5330.Contig1\_All, CL5330.Contig2\_All, CL5361.Contig2\_All, CL5361.Contig4\_All, CL5468.Contig3\_All, CL5469.Contig2\_All, CL571.Contig2\_All, CL573.Contig1\_All, CL600.Contig1\_All, CL600.Contig2\_All, CL600.Contig3\_All, CL600.Contig4\_All, CL600.Contig6\_All, CL644.Contig1\_All, CL657.Contig1\_All, CL657.Contig2\_All, CL695.Contig16\_All, CL741.Contig2\_All, CL748.Contig1\_All, CL748.Contig3\_All, CL916.Contig2\_All, CL92.Contig3\_All, CL923.Contig1\_All, CL923.Contig2\_All, CL923.Contig3\_All, CL970.Contig2\_All, Unigene10097\_All, Unigene10201\_All, Unigene10202\_All, Unigene10448\_All, Unigene10682\_All, Unigene10775\_All, Unigene10998\_All, Unigene11052\_All, Unigene11082\_All, Unigene11289\_All, Unigene11298\_All, Unigene11300\_All, Unigene11307\_All, Unigene1131\_All, Unigene11372\_All, Unigene1137\_All, Unigene11459\_All, Unigene11521\_All, Unigene11597\_All, Unigene11598\_All, Unigene11599\_All, Unigene11628\_All, Unigene11677\_All, Unigene1168\_All, Unigene11935\_All, Unigene12201\_All, Unigene12255\_All, Unigene12301\_All, Unigene123\_All, Unigene12418\_All, Unigene1257\_All, Unigene12603\_All, Unigene12617\_All, Unigene12658\_All, Unigene12671\_All, Unigene12684\_All, Unigene12697\_All, Unigene12711\_All, Unigene12828\_All, Unigene13036\_All, Unigene13092\_All, Unigene1447\_All, Unigene1496\_All, Unigene1512\_All, Unigene15194\_All, Unigene15195\_All, Unigene15271\_All, Unigene16098\_All, Unigene1633\_All, Unigene16435\_All, Unigene16510\_All, Unigene16716\_All, Unigene16747\_All, Unigene16840\_All, Unigene16874\_All, Unigene16963\_All, Unigene16976\_All, Unigene16994\_All, Unigene1705\_All, Unigene17117\_All, Unigene17362\_All, Unigene17551\_All, Unigene1777\_All, Unigene17815\_All, Unigene17824\_All, Unigene18076\_All, Unigene18106\_All, Unigene18178\_All, Unigene18215\_All, Unigene18276\_All, Unigene18317\_All, Unigene18378\_All, Unigene1855\_All, Unigene18598\_All, Unigene18644\_All, Unigene18645\_All, Unigene18873\_All, Unigene19289\_All, Unigene19364\_All, Unigene1941\_All, Unigene19453\_All, Unigene19601\_All, Unigene19647\_All, Unigene19745\_All, Unigene1974\_All, Unigene20065\_All, Unigene20111\_All, Unigene2015\_All, Unigene20299\_All, Unigene2052\_All, Unigene20530\_All, Unigene2053\_All, Unigene20625\_All, Unigene21008\_All, Unigene210\_All, Unigene2145\_All, Unigene214\_All, Unigene2233\_All, Unigene2237\_All, Unigene24\_All, Unigene2514\_All, Unigene2741\_All, Unigene278\_All, Unigene3088\_All, Unigene3153\_All, Unigene3300\_All, Unigene3328\_All, Unigene3471\_All, Unigene3482\_All, Unigene3659\_All, Unigene3696\_All, Unigene3945\_All, Unigene4022\_All, Unigene4067\_All, Unigene4161\_All, Unigene4207\_All, Unigene4269\_All, Unigene4692\_All, Unigene4920\_All, Unigene4935\_All, Unigene4970\_All, Unigene4987\_All, Unigene500\_All, Unigene5088\_All, Unigene5303\_All, Unigene5305\_All, Unigene5715\_All, Unigene5753\_All, Unigene5808\_All, Unigene5813\_All, Unigene5821\_All, Unigene5873\_All, Unigene5993\_All, Unigene5994\_All, Unigene6013\_All, Unigene6015\_All, Unigene6029\_All, Unigene6037\_All, Unigene6059\_All, Unigene6073\_All, Unigene6136\_All, Unigene6273\_All, Unigene6283\_All, Unigene6525\_All, Unigene6655\_All, Unigene6896\_All, Unigene6907\_All, Unigene6994\_All, Unigene699\_All, Unigene7063\_All, Unigene7129\_All, Unigene7250\_All, Unigene7348\_All, Unigene7547\_All, Unigene7704\_All, Unigene7759\_All, Unigene7829\_All, Unigene7854\_All, Unigene785\_All, Unigene7958\_All, Unigene7993\_All, Unigene8009\_All, Unigene8017\_All, Unigene8029\_All, Unigene8184\_All, Unigene8585\_All, Unigene8615\_All, Unigene8725\_All, Unigene8747\_All, Unigene8770\_All, Unigene9014\_All, Unigene9039\_All, Unigene9042\_All, Unigene9050\_All, Unigene9059\_All, Unigene9067\_All, Unigene9076\_All, Unigene90\_All, Unigene9163\_All, Unigene9379\_All, Unigene9719\_All, Unigene9722\_All, Unigene9785\_All, Unigene9787\_All, Unigene9836\_All, Unigene9877\_All, Unigene9902\_All, Unigene9904\_All, Unigene9947\_All



|    |                                               |                                                                                                                                                                                                                                                                                                                                                                                                                                                                                                                                                                                                                                                                                                                                                                                                                                                                                                                                                                                                                                                                                                                                                                                                                                                                                                                                                                                                                                                                                                                                                                                                                                                                                                                                                                                                                                                                                                            |
|----|-----------------------------------------------|------------------------------------------------------------------------------------------------------------------------------------------------------------------------------------------------------------------------------------------------------------------------------------------------------------------------------------------------------------------------------------------------------------------------------------------------------------------------------------------------------------------------------------------------------------------------------------------------------------------------------------------------------------------------------------------------------------------------------------------------------------------------------------------------------------------------------------------------------------------------------------------------------------------------------------------------------------------------------------------------------------------------------------------------------------------------------------------------------------------------------------------------------------------------------------------------------------------------------------------------------------------------------------------------------------------------------------------------------------------------------------------------------------------------------------------------------------------------------------------------------------------------------------------------------------------------------------------------------------------------------------------------------------------------------------------------------------------------------------------------------------------------------------------------------------------------------------------------------------------------------------------------------------|
| 64 | <a href="#">Phototransduction - fly</a>       | CL1165.Contig1_All, CL1165.Contig2_All, CL1165.Contig3_All, CL1165.Contig4_All, CL128.Contig10_All, CL1286.Contig2_All, CL1355.Contig1_All, CL156.Contig1_All, CL156.Contig3_All, CL156.Contig4_All, CL1803.Contig1_All, CL1823.Contig8_All, CL2131.Contig4_All, CL2131.Contig5_All, CL2131.Contig6_All, CL2131.Contig8_All, CL2182.Contig1_All, CL2182.Contig3_All, CL2182.Contig4_All, CL2468.Contig1_All, CL2468.Contig2_All, CL2930.Contig5_All, CL3224.Contig1_All, CL3323.Contig1_All, CL3323.Contig2_All, CL3667.Contig1_All, CL3667.Contig2_All, CL3667.Contig3_All, CL39.Contig1_All, CL39.Contig2_All, CL39.Contig3_All, CL39.Contig4_All, CL4395.Contig1_All, CL44.Contig10_All, CL44.Contig12_All, CL44.Contig13_All, CL44.Contig16_All, CL44.Contig17_All, CL44.Contig18_All, CL44.Contig19_All, CL44.Contig1_All, CL44.Contig22_All, CL44.Contig23_All, CL44.Contig2_All, CL44.Contig3_All, CL44.Contig4_All, CL44.Contig5_All, CL44.Contig6_All, CL44.Contig8_All, CL44.Contig9_All, CL4509.Contig1_All, CL4509.Contig2_All, CL5290.Contig1_All, CL5290.Contig2_All, CL5391.Contig1_All, CL5391.Contig2_All, CL5399.Contig1_All, CL5399.Contig2_All, CL5468.Contig3_All, CL691.Contig1_All, CL691.Contig5_All, CL772.Contig1_All, CL772.Contig2_All, CL90.Contig1_All, CL90.Contig2_All, CL940.Contig3_All, CL940.Contig5_All, Unigene10006_All, Unigene10574_All, Unigene11054_All, Unigene11597_All, Unigene11598_All, Unigene11599_All, Unigene12110_All, Unigene12315_All, Unigene12684_All, Unigene12719_All, Unigene13092_All, Unigene16498_All, Unigene16769_All, Unigene1726_All, Unigene18598_All, Unigene18898_All, Unigene18993_All, Unigene19947_All, Unigene2209_All, Unigene2741_All, Unigene278_All, Unigene2812_All, Unigene3996_All, Unigene4013_All, Unigene4053_All, Unigene4070_All, Unigene4780_All, Unigene555_All, Unigene5675_All, Unigene8422_All, Unigene9437_All |
| 65 | <a href="#">Inositol phosphate metabolism</a> | CL2035.Contig1_All, CL2035.Contig4_All, CL2551.Contig1_All, CL2552.Contig3_All, CL2835.Contig1_All, CL2835.Contig2_All, CL2835.Contig3_All, CL2835.Contig4_All, CL2930.Contig5_All, CL2941.Contig1_All, CL2944.Contig1_All, CL2944.Contig2_All, CL309.Contig2_All, CL309.Contig3_All, CL309.Contig4_All, CL3142.Contig1_All, CL3142.Contig2_All, CL3163.Contig2_All, CL3410.Contig1_All, CL3410.Contig2_All, CL3505.Contig2_All, CL367.Contig1_All, CL367.Contig2_All, CL367.Contig3_All, CL3687.Contig1_All, CL3687.Contig2_All, CL3979.Contig1_All, CL3979.Contig2_All, CL4883.Contig1_All, CL4883.Contig2_All, CL5310.Contig2_All, CL542.Contig1_All, CL542.Contig2_All, CL688.Contig2_All, CL728.Contig1_All, CL737.Contig5_All, CL737.Contig6_All, CL959.Contig1_All, Unigene11003_All, Unigene11082_All, Unigene11319_All, Unigene11826_All, Unigene12619_All, Unigene12907_All, Unigene13034_All, Unigene17873_All, Unigene3149_All, Unigene4053_All, Unigene4070_All, Unigene4159_All, Unigene4332_All, Unigene5681_All, Unigene5811_All, Unigene6640_All, Unigene6996_All, Unigene6997_All, Unigene7000_All, Unigene8422_All, Unigene9067_All, Unigene9127_All, Unigene9805_All                                                                                                                                                                                                                                                                                                                                                                                                                                                                                                                                                                                                                                                                                                                   |
| 66 | <a href="#">Apoptosis</a>                     | CL1066.Contig1_All, CL1066.Contig2_All, CL1066.Contig3_All, CL131.Contig1_All, CL131.Contig2_All, CL1452.Contig1_All, CL2882.Contig1_All, CL2882.Contig2_All, CL367.Contig1_All, CL367.Contig2_All, CL367.Contig3_All, CL4175.Contig1_All, CL4175.Contig2_All, CL4175.Contig3_All, CL4521.Contig1_All, CL4521.Contig2_All, CL4521.Contig3_All, CL4521.Contig5_All, CL5064.Contig2_All, CL5299.Contig1_All, CL695.Contig16_All, CL851.Contig3_All, CL940.Contig3_All, CL940.Contig5_All, Unigene11526_All, Unigene11724_All, Unigene11867_All, Unigene12188_All, Unigene12691_All, Unigene13853_All, Unigene14063_All, Unigene1757_All, Unigene17702_All, Unigene2749_All, Unigene3779_All, Unigene4112_All, Unigene4581_All, Unigene7049_All, Unigene7205_All, Unigene7220_All, Unigene7667_All, Unigene8246_All, Unigene951_All, Unigene9664_All, Unigene9733_All                                                                                                                                                                                                                                                                                                                                                                                                                                                                                                                                                                                                                                                                                                                                                                                                                                                                                                                                                                                                                                         |
| 67 | <a href="#">Glioma</a>                        | CL1066.Contig1_All, CL1066.Contig2_All, CL1066.Contig3_All, CL1286.Contig2_All, CL1548.Contig2_All, CL1548.Contig3_All, CL1807.Contig1_All, CL1807.Contig2_All, CL1823.Contig8_All, CL1874.Contig2_All, CL2131.Contig4_All, CL2131.Contig5_All, CL2131.Contig6_All, CL2131.Contig8_All, CL2182.Contig1_All, CL2182.Contig3_All, CL2182.Contig4_All, CL241.Contig1_All, CL241.Contig7_All, CL2468.Contig1_All, CL2468.Contig2_All, CL2552.Contig3_All, CL3373.Contig1_All, CL3373.Contig2_All, CL3667.Contig1_All, CL3667.Contig2_All, CL3667.Contig3_All, CL367.Contig1_All, CL367.Contig2_All, CL367.Contig3_All, CL3796.Contig2_All, CL3796.Contig3_All, CL39.Contig1_All, CL39.Contig2_All, CL39.Contig3_All, CL39.Contig4_All, CL3979.Contig1_All, CL3979.Contig2_All, CL4395.Contig1_All, CL44.Contig10_All, CL44.Contig12_All, CL44.Contig13_All, CL44.Contig16_All, CL44.Contig17_All, CL44.Contig18_All, CL44.Contig19_All, CL44.Contig1_All, CL44.Contig22_All, CL44.Contig23_All, CL44.Contig2_All, CL44.Contig3_All, CL44.Contig4_All, CL44.Contig5_All, CL44.Contig6_All, CL44.Contig8_All, CL44.Contig9_All, CL4439.Contig2_All, CL4509.Contig1_All, CL4509.Contig2_All, CL4559.Contig2_All, CL4559.Contig3_All, CL4787.Contig1_All, CL5391.Contig1_All, CL5391.Contig2_All, CL695.Contig16_All, CL772.Contig1_All, CL772.Contig2_All, CL940.Contig3_All, CL940.Contig5_All, CL95.Contig1_All, Unigene10006_All, Unigene10174_All, Unigene10574_All, Unigene11054_All, Unigene12099_All, Unigene12315_All, Unigene12671_All, Unigene12719_All, Unigene16769_All, Unigene18898_All, Unigene2374_All, Unigene2749_All, Unigene3996_All, Unigene4013_All, Unigene5675_All, Unigene699_All, Unigene7016_All, Unigene8046_All, Unigene8747_All                                                                                                                                                     |
| 68 | <a href="#">Basal transcription factors</a>   | CL1109.Contig1_All, CL1109.Contig2_All, CL1109.Contig3_All, CL1109.Contig4_All, CL1470.Contig2_All, CL1637.Contig1_All, CL1687.Contig4_All, CL1812.Contig1_All, CL1812.Contig2_All, CL185.Contig1_All, CL185.Contig2_All, CL185.Contig3_All, CL185.Contig4_All, CL2733.Contig2_All, CL2733.Contig3_All, CL2848.Contig4_All, CL3165.Contig1_All, CL3165.Contig2_All, CL3165.Contig3_All, CL3372.Contig1_All, CL3963.Contig1_All, CL4103.Contig1_All, CL4319.Contig2_All, CL4555.Contig1_All, CL5237.Contig1_All, CL5237.Contig2_All, CL856.Contig1_All, Unigene1137_All, Unigene12516_All, Unigene12806_All, Unigene12891_All, Unigene13197_All, Unigene1638_All, Unigene1696_All, Unigene17856_All, Unigene17875_All, Unigene17994_All, Unigene1857_All, Unigene236_All, Unigene2960_All, Unigene3871_All, Unigene4384_All, Unigene480_All, Unigene4817_All, Unigene4824_All, Unigene5009_All, Unigene5010_All, Unigene5011_All, Unigene5012_All, Unigene567_All, Unigene6046_All, Unigene7049_All, Unigene7699_All, Unigene7741_All, Unigene8025_All, Unigene8250_All, Unigene8784_All, Unigene8833_All, Unigene9061_All                                                                                                                                                                                                                                                                                                                                                                                                                                                                                                                                                                                                                                                                                                                                                                                  |

|    |                                                     |                                                                                                                                                                                                                                                                                                                                                                                                                                                                                                                                                                                                                                                                                                                                                                                                                                                                                                                                                                                                                                                                                                                                                                                                                                                                                                                                                                                                                                                                                                                                                                                                                                                                                                                                                                                                                                                                                                                                                                                                                                                                                                                                                                                                                                                                                                                                                                                                           |
|----|-----------------------------------------------------|-----------------------------------------------------------------------------------------------------------------------------------------------------------------------------------------------------------------------------------------------------------------------------------------------------------------------------------------------------------------------------------------------------------------------------------------------------------------------------------------------------------------------------------------------------------------------------------------------------------------------------------------------------------------------------------------------------------------------------------------------------------------------------------------------------------------------------------------------------------------------------------------------------------------------------------------------------------------------------------------------------------------------------------------------------------------------------------------------------------------------------------------------------------------------------------------------------------------------------------------------------------------------------------------------------------------------------------------------------------------------------------------------------------------------------------------------------------------------------------------------------------------------------------------------------------------------------------------------------------------------------------------------------------------------------------------------------------------------------------------------------------------------------------------------------------------------------------------------------------------------------------------------------------------------------------------------------------------------------------------------------------------------------------------------------------------------------------------------------------------------------------------------------------------------------------------------------------------------------------------------------------------------------------------------------------------------------------------------------------------------------------------------------------|
| 69 | <a href="#">Amyotrophic lateral sclerosis (ALS)</a> | CL1042.Contig3_All, CL1048.Contig2_All, CL1535.Contig3_All, CL1549.Contig2_All, CL1850.Contig1_All, CL1850.Contig2_All, CL1884.Contig1_All, CL1884.Contig4_All, CL2129.Contig4_All, CL2405.Contig1_All, CL2426.Contig1_All, CL2426.Contig2_All, CL2730.Contig4_All, CL2733.Contig2_All, CL2882.Contig1_All, CL2882.Contig2_All, CL2986.Contig1_All, CL2986.Contig2_All, CL305.Contig2_All, CL3241.Contig1_All, CL3241.Contig2_All, CL3562.Contig6_All, CL36.Contig6_All, CL3635.Contig3_All, CL3651.Contig1_All, CL3651.Contig2_All, CL3657.Contig3_All, CL3789.Contig1_All, CL3789.Contig2_All, CL3803.Contig2_All, CL3886.Contig1_All, CL3886.Contig2_All, CL3886.Contig3_All, CL3886.Contig4_All, CL392.Contig1_All, CL392.Contig3_All, CL4094.Contig1_All, CL4094.Contig2_All, CL4216.Contig1_All, CL4216.Contig2_All, CL4340.Contig1_All, CL4340.Contig2_All, CL4521.Contig1_All, CL4521.Contig2_All, CL4521.Contig3_All, CL4521.Contig5_All, CL4686.Contig2_All, CL4803.Contig1_All, CL4966.Contig1_All, CL4983.Contig2_All, CL5064.Contig2_All, CL5136.Contig1_All, CL5136.Contig2_All, CL5299.Contig1_All, CL851.Contig3_All, CL870.Contig4_All, CL870.Contig8_All, CL870.Contig9_All, Unigene10058_All, Unigene10887_All, Unigene10948_All, Unigene1095_All, Unigene10981_All, Unigene1137_All, Unigene11623_All, Unigene1169_All, Unigene11724_All, Unigene12139_All, Unigene12175_All, Unigene12186_All, Unigene12188_All, Unigene12322_All, Unigene12468_All, Unigene12738_All, Unigene12888_All, Unigene1326_All, Unigene13853_All, Unigene13901_All, Unigene14063_All, Unigene1417_All, Unigene166_All, Unigene16_All, Unigene17577_All, Unigene17702_All, Unigene17856_All, Unigene18186_All, Unigene18260_All, Unigene18343_All, Unigene18761_All, Unigene190_All, Unigene19148_All, Unigene19880_All, Unigene2039_All, Unigene2552_All, Unigene2621_All, Unigene3457_All, Unigene3846_All, Unigene4085_All, Unigene4190_All, Unigene4406_All, Unigene4541_All, Unigene4581_All, Unigene5092_All, Unigene6069_All, Unigene6123_All, Unigene6169_All, Unigene661_All, Unigene6961_All, Unigene7049_All, Unigene7067_All, Unigene7074_All, Unigene715_All, Unigene7192_All, Unigene7205_All, Unigene7213_All, Unigene7508_All, Unigene8023_All, Unigene822_All, Unigene8251_All, Unigene9015_All, Unigene9132_All, Unigene9252_All, Unigene9664_All                                         |
| 70 | <a href="#">Renin-angiotensin system</a>            | CL1175.Contig1_All, CL1175.Contig2_All, CL1537.Contig1_All, CL1537.Contig2_All, CL2028.Contig1_All, CL2028.Contig2_All, CL2267.Contig1_All, CL300.Contig7_All, CL3106.Contig1_All, CL3331.Contig1_All, CL4294.Contig1_All, CL4294.Contig2_All, CL4410.Contig1_All, CL4903.Contig1_All, Unigene10452_All, Unigene106_All, Unigene11378_All, Unigene11484_All, Unigene11660_All, Unigene12199_All, Unigene12922_All, Unigene15769_All, Unigene17741_All, Unigene2096_All, Unigene4326_All, Unigene4510_All, Unigene5034_All, Unigene5065_All, Unigene5225_All, Unigene5257_All, Unigene6036_All, Unigene6207_All, Unigene6692_All, Unigene7926_All, Unigene8011_All, Unigene8079_All, Unigene8166_All, Unigene8221_All, Unigene8504_All, Unigene8718_All, Unigene9038_All, Unigene9058_All                                                                                                                                                                                                                                                                                                                                                                                                                                                                                                                                                                                                                                                                                                                                                                                                                                                                                                                                                                                                                                                                                                                                                                                                                                                                                                                                                                                                                                                                                                                                                                                                                  |
| 71 | <a href="#">Small cell lung cancer</a>              | CL1055.Contig5_All, CL1066.Contig1_All, CL1066.Contig2_All, CL1066.Contig3_All, CL1091.Contig14_All, CL1202.Contig2_All, CL1328.Contig2_All, CL1436.Contig2_All, CL1495.Contig1_All, CL1495.Contig2_All, CL1741.Contig1_All, CL1960.Contig1_All, CL1960.Contig2_All, CL2052.Contig1_All, CL2052.Contig2_All, CL2066.Contig1_All, CL209.Contig1_All, CL209.Contig2_All, CL209.Contig3_All, CL209.Contig4_All, CL2099.Contig1_All, CL2331.Contig2_All, CL2331.Contig3_All, CL2552.Contig3_All, CL2882.Contig1_All, CL2882.Contig2_All, CL2927.Contig3_All, CL3327.Contig1_All, CL3327.Contig2_All, CL3371.Contig1_All, CL3373.Contig1_All, CL3373.Contig2_All, CL367.Contig1_All, CL367.Contig2_All, CL367.Contig3_All, CL470.Contig1_All, CL4992.Contig1_All, CL5048.Contig1_All, CL5204.Contig1_All, CL5204.Contig2_All, CL5268.Contig2_All, CL5299.Contig1_All, CL5373.Contig1_All, CL5373.Contig2_All, CL5464.Contig1_All, CL5464.Contig2_All, CL5464.Contig3_All, CL695.Contig16_All, CL748.Contig1_All, CL748.Contig3_All, CL851.Contig3_All, CL880.Contig3_All, Unigene10095_All, Unigene10096_All, Unigene10316_All, Unigene10724_All, Unigene11160_All, Unigene11358_All, Unigene11511_All, Unigene11538_All, Unigene11543_All, Unigene11544_All, Unigene11588_All, Unigene11724_All, Unigene12099_All, Unigene12155_All, Unigene12188_All, Unigene12533_All, Unigene12623_All, Unigene12692_All, Unigene12710_All, Unigene14177_All, Unigene15658_All, Unigene15840_All, Unigene1614_All, Unigene16913_All, Unigene16965_All, Unigene16966_All, Unigene1757_All, Unigene17702_All, Unigene17728_All, Unigene18488_All, Unigene18496_All, Unigene19237_All, Unigene19426_All, Unigene19840_All, Unigene2190_All, Unigene2374_All, Unigene2503_All, Unigene2560_All, Unigene2749_All, Unigene28_All, Unigene3123_All, Unigene3184_All, Unigene3193_All, Unigene3403_All, Unigene3889_All, Unigene3945_All, Unigene414_All, Unigene4207_All, Unigene4218_All, Unigene4418_All, Unigene4581_All, Unigene4922_All, Unigene5169_All, Unigene5799_All, Unigene5896_All, Unigene6041_All, Unigene6614_All, Unigene6780_All, Unigene7049_All, Unigene7054_All, Unigene7106_All, Unigene7205_All, Unigene7220_All, Unigene7299_All, Unigene740_All, Unigene7560_All, Unigene8102_All, Unigene8399_All, Unigene8514_All, Unigene8562_All, Unigene9284_All, Unigene9611_All, Unigene9664_All, Unigene9988_All |
| 72 | <a href="#">Taste transduction</a>                  | CL1452.Contig1_All, CL1730.Contig2_All, CL260.Contig15_All, CL2930.Contig5_All, CL3234.Contig2_All, CL4085.Contig1_All, CL4085.Contig2_All, CL4119.Contig1_All, CL4262.Contig2_All, CL4316.Contig1_All, CL5148.Contig2_All, CL5280.Contig1_All, CL905.Contig1_All, CL905.Contig2_All, CL940.Contig3_All, CL940.Contig5_All, Unigene10058_All, Unigene12110_All, Unigene124_All, Unigene16125_All, Unigene18035_All, Unigene19476_All, Unigene19524_All, Unigene2029_All, Unigene2032_All, Unigene2209_All, Unigene3204_All, Unigene3779_All, Unigene4053_All, Unigene4070_All, Unigene4112_All, Unigene4532_All, Unigene4780_All, Unigene4950_All, Unigene6151_All, Unigene7322_All, Unigene7661_All, Unigene8081_All, Unigene8114_All, Unigene8422_All, Unigene93_All, Unigene957_All, Unigene9629_All, Unigene9733_All                                                                                                                                                                                                                                                                                                                                                                                                                                                                                                                                                                                                                                                                                                                                                                                                                                                                                                                                                                                                                                                                                                                                                                                                                                                                                                                                                                                                                                                                                                                                                                                  |

|    |                                                           |                                                                                                                                                                                                                                                                                                                                                                                                                                                                                                                                                                                                                                                                                                                                                                                                                                                                                                                                                                                                                                                                                                                                                                                                                                                                                                                                                                                                                                                                                                                                                                                                                                                                                                                                                                                                                                                                                                                                                                                                                                                                                                                                                                                                                                                                                                                                                                                                                                                                                                                                                                                                                                                                                                                                                                                                                                                                                                                                                                                                                                                                                                                                                                                                                                                                                                                                                                           |
|----|-----------------------------------------------------------|---------------------------------------------------------------------------------------------------------------------------------------------------------------------------------------------------------------------------------------------------------------------------------------------------------------------------------------------------------------------------------------------------------------------------------------------------------------------------------------------------------------------------------------------------------------------------------------------------------------------------------------------------------------------------------------------------------------------------------------------------------------------------------------------------------------------------------------------------------------------------------------------------------------------------------------------------------------------------------------------------------------------------------------------------------------------------------------------------------------------------------------------------------------------------------------------------------------------------------------------------------------------------------------------------------------------------------------------------------------------------------------------------------------------------------------------------------------------------------------------------------------------------------------------------------------------------------------------------------------------------------------------------------------------------------------------------------------------------------------------------------------------------------------------------------------------------------------------------------------------------------------------------------------------------------------------------------------------------------------------------------------------------------------------------------------------------------------------------------------------------------------------------------------------------------------------------------------------------------------------------------------------------------------------------------------------------------------------------------------------------------------------------------------------------------------------------------------------------------------------------------------------------------------------------------------------------------------------------------------------------------------------------------------------------------------------------------------------------------------------------------------------------------------------------------------------------------------------------------------------------------------------------------------------------------------------------------------------------------------------------------------------------------------------------------------------------------------------------------------------------------------------------------------------------------------------------------------------------------------------------------------------------------------------------------------------------------------------------------------------------|
| 73 | <a href="#">Leukocyte transendothelial migration</a>      | <p>CL1066.Contig1_All, CL1066.Contig2_All, CL1066.Contig3_All, CL119.Contig10_All, CL119.Contig11_All, CL119.Contig3_All, CL119.Contig4_All, CL119.Contig8_All, CL119.Contig9_All, CL1355.Contig1_All, CL1503.Contig3_All, CL1503.Contig4_All, CL1503.Contig5_All, CL1535.Contig3_All, CL156.Contig1_All, CL156.Contig3_All, CL156.Contig4_All, CL1803.Contig1_All, CL1954.Contig1_All, CL1954.Contig2_All, CL2034.Contig1_All, CL2034.Contig2_All, CL2066.Contig1_All, CL2182.Contig1_All, CL2182.Contig3_All, CL2182.Contig4_All, CL2222.Contig9_All, CL2224.Contig2_All, CL2224.Contig3_All, CL2224.Contig4_All, CL263.Contig3_All, CL263.Contig5_All, CL271.Contig2_All, CL3042.Contig1_All, CL3042.Contig3_All, CL3116.Contig2_All, CL3130.Contig1_All, CL3130.Contig2_All, CL3348.Contig1_All, CL3397.Contig1_All, CL3397.Contig3_All, CL3397.Contig4_All, CL3436.Contig1_All, CL3436.Contig4_All, CL3436.Contig9_All, CL3460.Contig2_All, CL3460.Contig3_All, CL361.Contig1_All, CL367.Contig1_All, CL367.Contig2_All, CL367.Contig3_All, CL3823.Contig1_All, CL3823.Contig2_All, CL39.Contig1_All, CL39.Contig2_All, CL39.Contig3_All, CL39.Contig4_All, CL3979.Contig1_All, CL3979.Contig2_All, CL4966.Contig1_All, CL523.Contig1_All, CL523.Contig2_All, CL5330.Contig1_All, CL5330.Contig2_All, CL5361.Contig2_All, CL5361.Contig4_All, CL5391.Contig1_All, CL5391.Contig2_All, CL5468.Contig3_All, CL695.Contig16_All, CL724.Contig1_All, CL748.Contig1_All, CL748.Contig3_All, CL940.Contig3_All, CL940.Contig5_All, Unigene11307_All, Unigene11597_All, Unigene11598_All, Unigene11599_All, Unigene11628_All, Unigene11874_All, Unigene12314_All, Unigene12684_All, Unigene13092_All, Unigene18317_All, Unigene18423_All, Unigene1855_All, Unigene18598_All, Unigene18644_All, Unigene18873_All, Unigene18898_All, Unigene19601_All, Unigene2741_All, Unigene278_All, Unigene3088_All, Unigene3135_All, Unigene3153_All, Unigene3300_All, Unigene3945_All, Unigene4207_All, Unigene5521_All, Unigene5727_All, Unigene5808_All, Unigene5813_All, Unigene6146_All, Unigene6217_All, Unigene6283_All, Unigene7063_All, Unigene7158_All, Unigene7547_All, Unigene783_All, Unigene8247_All, Unigene8585_All, Unigene9042_All, Unigene9050_All, Unigene9379_All, Unigene9877_All</p>                                                                                                                                                                                                                                                                                                                                                                                                                                                                                                                                                                                                                                                                                                                                                                                                                                                                                                                                                                                                                                                                              |
| 74 | <a href="#">Tuberculosis</a>                              | <p>CL1085.Contig3_All, CL1280.Contig1_All, CL1280.Contig2_All, CL1286.Contig2_All, CL1341.Contig2_All, CL1823.Contig8_All, CL188.Contig16_All, CL2131.Contig4_All, CL2131.Contig5_All, CL2131.Contig6_All, CL2131.Contig8_All, CL2150.Contig3_All, CL2170.Contig2_All, CL2170.Contig5_All, CL2224.Contig2_All, CL2224.Contig3_All, CL2224.Contig4_All, CL2468.Contig1_All, CL2468.Contig2_All, CL2634.Contig1_All, CL2634.Contig2_All, CL2711.Contig1_All, CL2711.Contig2_All, CL2750.Contig3_All, CL2882.Contig1_All, CL2882.Contig2_All, CL3091.Contig1_All, CL3091.Contig2_All, CL3091.Contig3_All, CL3091.Contig4_All, CL3221.Contig1_All, CL3274.Contig1_All, CL3667.Contig1_All, CL3667.Contig2_All, CL3667.Contig3_All, CL3865.Contig2_All, CL3884.Contig2_All, CL3920.Contig2_All, CL4090.Contig2_All, CL4187.Contig1_All, CL4250.Contig2_All, CL4317.Contig1_All, CL4395.Contig1_All, CL44.Contig10_All, CL44.Contig12_All, CL44.Contig13_All, CL44.Contig16_All, CL44.Contig17_All, CL44.Contig18_All, CL44.Contig19_All, CL44.Contig1_All, CL44.Contig22_All, CL44.Contig23_All, CL44.Contig2_All, CL44.Contig3_All, CL44.Contig4_All, CL44.Contig5_All, CL44.Contig6_All, CL44.Contig8_All, CL44.Contig9_All, CL4459.Contig1_All, CL4459.Contig2_All, CL4509.Contig1_All, CL4509.Contig2_All, CL4521.Contig1_All, CL4521.Contig2_All, CL4521.Contig3_All, CL4521.Contig5_All, CL4596.Contig2_All, CL4857.Contig1_All, CL4966.Contig1_All, CL5064.Contig2_All, CL5115.Contig1_All, CL5299.Contig1_All, CL5466.Contig1_All, CL724.Contig1_All, CL772.Contig1_All, CL772.Contig2_All, CL851.Contig3_All, Unigene10006_All, Unigene10007_All, Unigene10026_All, Unigene10041_All, Unigene10170_All, Unigene10296_All, Unigene10423_All, Unigene10424_All, Unigene10483_All, Unigene10503_All, Unigene1051_All, Unigene10574_All, Unigene10682_All, Unigene11054_All, Unigene1109_All, Unigene11270_All, Unigene11307_All, Unigene1131_All, Unigene11553_All, Unigene11554_All, Unigene11724_All, Unigene11865_All, Unigene11901_All, Unigene11919_All, Unigene12028_All, Unigene12172_All, Unigene12188_All, Unigene12209_All, Unigene12302_All, Unigene12315_All, Unigene12455_All, Unigene12634_All, Unigene12719_All, Unigene12840_All, Unigene12853_All, Unigene12923_All, Unigene13324_All, Unigene13732_All, Unigene13853_All, Unigene15243_All, Unigene15257_All, Unigene16747_All, Unigene16769_All, Unigene1741_All, Unigene1757_All, Unigene17702_All, Unigene18106_All, Unigene18675_All, Unigene18707_All, Unigene18950_All, Unigene1895_All, Unigene1913_All, Unigene20095_All, Unigene2015_All, Unigene2053_All, Unigene2096_All, Unigene2111_All, Unigene220_All, Unigene2275_All, Unigene2749_All, Unigene2982_All, Unigene313_All, Unigene3157_All, Unigene3730_All, Unigene3830_All, Unigene3996_All, Unigene4013_All, Unigene4159_All, Unigene44_All, Unigene4581_All, Unigene462_All, Unigene4677_All, Unigene54_All, Unigene5675_All, Unigene5781_All, Unigene5808_All, Unigene5890_All, Unigene6013_All, Unigene6015_All, Unigene6173_All, Unigene624_All, Unigene6907_All, Unigene7049_All, Unigene7056_All, Unigene7129_All, Unigene712_All, Unigene7205_All, Unigene7873_All, Unigene8151_All, Unigene8246_All, Unigene8504_All, Unigene8737_All, Unigene9050_All, Unigene9229_All, Unigene925_All, Unigene9664_All, Unigene9877_All</p> |
| 75 | <a href="#">Chagas disease (American trypanosomiasis)</a> | <p>CL1066.Contig1_All, CL1066.Contig2_All, CL1066.Contig3_All, CL1085.Contig3_All, CL1776.Contig1_All, CL1966.Contig2_All, CL2873.Contig1_All, CL2873.Contig2_All, CL2930.Contig5_All, CL367.Contig1_All, CL367.Contig2_All, CL367.Contig3_All, CL4005.Contig2_All, CL4005.Contig3_All, CL4271.Contig1_All, CL4736.Contig1_All, CL4736.Contig2_All, CL4923.Contig2_All, CL4966.Contig1_All, CL5115.Contig1_All, CL5399.Contig1_All, CL5399.Contig2_All, CL695.Contig16_All, CL761.Contig1_All, CL761.Contig2_All, Unigene10058_All, Unigene10242_All, Unigene11845_All, Unigene13432_All, Unigene1479_All, Unigene1743_All, Unigene1757_All, Unigene176_All, Unigene20095_All, Unigene2196_All, Unigene2209_All, Unigene220_All, Unigene2749_All, Unigene4053_All, Unigene4070_All, Unigene4126_All, Unigene4532_All, Unigene4801_All, Unigene5521_All, Unigene6217_All, Unigene6977_All, Unigene69_All, Unigene8246_All, Unigene8422_All, Unigene9437_All</p>                                                                                                                                                                                                                                                                                                                                                                                                                                                                                                                                                                                                                                                                                                                                                                                                                                                                                                                                                                                                                                                                                                                                                                                                                                                                                                                                                                                                                                                                                                                                                                                                                                                                                                                                                                                                                                                                                                                                                                                                                                                                                                                                                                                                                                                                                                                                                                                                            |

|    |                                                      |                                                                                                                                                                                                                                                                                                                                                                                                                                                                                                                                                                                                                                                                                                                                                                                                                                                                                                                                                                                                                                                                                                                                                                                                                                                                                                                                                                                                                                                                                                                                                                                                                                                                                                                                                                                                                                                                                                                                                                                                                                                                                                                                                                                                                                                                                                                                                                                                                                                                                                                                                                                                                                                                                                                                                                                 |
|----|------------------------------------------------------|---------------------------------------------------------------------------------------------------------------------------------------------------------------------------------------------------------------------------------------------------------------------------------------------------------------------------------------------------------------------------------------------------------------------------------------------------------------------------------------------------------------------------------------------------------------------------------------------------------------------------------------------------------------------------------------------------------------------------------------------------------------------------------------------------------------------------------------------------------------------------------------------------------------------------------------------------------------------------------------------------------------------------------------------------------------------------------------------------------------------------------------------------------------------------------------------------------------------------------------------------------------------------------------------------------------------------------------------------------------------------------------------------------------------------------------------------------------------------------------------------------------------------------------------------------------------------------------------------------------------------------------------------------------------------------------------------------------------------------------------------------------------------------------------------------------------------------------------------------------------------------------------------------------------------------------------------------------------------------------------------------------------------------------------------------------------------------------------------------------------------------------------------------------------------------------------------------------------------------------------------------------------------------------------------------------------------------------------------------------------------------------------------------------------------------------------------------------------------------------------------------------------------------------------------------------------------------------------------------------------------------------------------------------------------------------------------------------------------------------------------------------------------------|
| 76 | <a href="#">Wnt signaling pathway</a>                | <p>CL1276.Contig2_All, CL1389.Contig2_All, CL1439.Contig1_All, CL1439.Contig2_All, CL1452.Contig1_All, CL1535.Contig3_All, CL1831.Contig1_All, CL1831.Contig2_All, CL1843.Contig3_All, CL1912.Contig1_All, CL1912.Contig2_All, CL2170.Contig2_All, CL2170.Contig5_All, CL2182.Contig1_All, CL2182.Contig3_All, CL2182.Contig4_All, CL2208.Contig1_All, CL2224.Contig2_All, CL2224.Contig3_All, CL2224.Contig4_All, CL2400.Contig5_All, CL2748.Contig1_All, CL2748.Contig2_All, CL2788.Contig2_All, CL2838.Contig1_All, CL2838.Contig2_All, CL2838.Contig4_All, CL2847.Contig2_All, CL2930.Contig5_All, CL3823.Contig1_All, CL3823.Contig2_All, CL39.Contig1_All, CL39.Contig2_All, CL39.Contig3_All, CL39.Contig4_All, CL4190.Contig1_All, CL44.Contig10_All, CL44.Contig12_All, CL44.Contig13_All, CL44.Contig16_All, CL44.Contig17_All, CL44.Contig18_All, CL44.Contig19_All, CL44.Contig1_All, CL44.Contig22_All, CL44.Contig23_All, CL44.Contig2_All, CL44.Contig3_All, CL44.Contig4_All, CL44.Contig5_All, CL44.Contig6_All, CL44.Contig8_All, CL44.Contig9_All, CL4514.Contig2_All, CL4521.Contig1_All, CL4521.Contig2_All, CL4521.Contig3_All, CL4521.Contig5_All, CL4657.Contig2_All, CL4736.Contig1_All, CL4736.Contig2_All, CL4795.Contig1_All, CL5064.Contig2_All, CL5111.Contig1_All, CL5115.Contig1_All, CL5391.Contig1_All, CL5391.Contig2_All, CL896.Contig1_All, CL896.Contig3_All, CL940.Contig3_All, CL940.Contig5_All, Unigene10242_All, Unigene1040_All, Unigene10619_All, Unigene10761_All, Unigene10876_All, Unigene11040_All, Unigene11263_All, Unigene11307_All, Unigene11411_All, Unigene11922_All, Unigene11952_All, Unigene12591_All, Unigene12740_All, Unigene12874_All, Unigene12903_All, Unigene13134_All, Unigene13362_All, Unigene13432_All, Unigene13853_All, Unigene1479_All, Unigene150_All, Unigene1680_All, Unigene18644_All, Unigene18898_All, Unigene2050_All, Unigene220_All, Unigene236_All, Unigene247_All, Unigene2554_All, Unigene296_All, Unigene3054_All, Unigene3100_All, Unigene3131_All, Unigene3212_All, Unigene3715_All, Unigene3742_All, Unigene3779_All, Unigene3975_All, Unigene4053_All, Unigene4070_All, Unigene4112_All, Unigene442_All, Unigene4731_All, Unigene4765_All, Unigene4795_All, Unigene4801_All, Unigene4893_All, Unigene4940_All, Unigene4975_All, Unigene54_All, Unigene5727_All, Unigene5781_All, Unigene5808_All, Unigene6029_All, Unigene6746_All, Unigene7063_All, Unigene7163_All, Unigene7297_All, Unigene766_All, Unigene7671_All, Unigene777_All, Unigene783_All, Unigene798_All, Unigene8014_All, Unigene8422_All, Unigene8784_All, Unigene8861_All, Unigene8972_All, Unigene9050_All, Unigene9379_All, Unigene9641_All, Unigene9733_All, Unigene9746_All, Unigene9785_All, Unigene9877_All</p> |
| 77 | <a href="#">Systemic lupus erythematosus</a>         | <p>CL1085.Contig3_All, CL1503.Contig3_All, CL1503.Contig4_All, CL1503.Contig5_All, CL2197.Contig3_All, CL2901.Contig2_All, CL2901.Contig3_All, CL2901.Contig4_All, CL2901.Contig5_All, CL2901.Contig8_All, CL3032.Contig2_All, CL326.Contig1_All, CL4418.Contig2_All, CL4890.Contig1_All, CL838.Contig2_All, CL838.Contig3_All, CL870.Contig4_All, CL870.Contig8_All, CL870.Contig9_All, CL988.Contig1_All, CL988.Contig3_All, Unigene10020_All, Unigene10045_All, Unigene1056_All, Unigene10831_All, Unigene10869_All, Unigene10905_All, Unigene11396_All, Unigene11660_All, Unigene11913_All, Unigene12078_All, Unigene12228_All, Unigene12335_All, Unigene12663_All, Unigene13039_All, Unigene13095_All, Unigene17185_All, Unigene18873_All, Unigene19148_All, Unigene19400_All, Unigene20090_All, Unigene3217_All, Unigene6223_All, Unigene8848_All, Unigene9042_All, Unigene9633_All</p>                                                                                                                                                                                                                                                                                                                                                                                                                                                                                                                                                                                                                                                                                                                                                                                                                                                                                                                                                                                                                                                                                                                                                                                                                                                                                                                                                                                                                                                                                                                                                                                                                                                                                                                                                                                                                                                                                   |
| 78 | <a href="#">Maturity onset diabetes of the young</a> | <p>CL1246.Contig1_All, CL1246.Contig3_All, CL1246.Contig4_All, CL1357.Contig2_All, CL1357.Contig3_All, CL1502.Contig2_All, CL1648.Contig1_All, CL1702.Contig1_All, CL1702.Contig2_All, CL1872.Contig1_All, CL2574.Contig2_All, CL2574.Contig3_All, CL302.Contig1_All, CL302.Contig2_All, CL3527.Contig1_All, CL4829.Contig2_All, CL493.Contig2_All, CL5236.Contig4_All, CL5236.Contig5_All, Unigene12112_All, Unigene1238_All, Unigene12660_All, Unigene2012_All, Unigene2345_All, Unigene2670_All, Unigene3158_All, Unigene4217_All, Unigene695_All, Unigene705_All, Unigene7287_All, Unigene7647_All, Unigene7739_All, Unigene9001_All, Unigene9707_All</p>                                                                                                                                                                                                                                                                                                                                                                                                                                                                                                                                                                                                                                                                                                                                                                                                                                                                                                                                                                                                                                                                                                                                                                                                                                                                                                                                                                                                                                                                                                                                                                                                                                                                                                                                                                                                                                                                                                                                                                                                                                                                                                                   |
| 79 | <a href="#">Rheumatoid arthritis</a>                 | <p>CL1358.Contig1_All, CL1358.Contig2_All, CL1358.Contig3_All, CL2150.Contig3_All, CL2634.Contig1_All, CL2634.Contig2_All, CL3091.Contig1_All, CL3091.Contig2_All, CL3091.Contig3_All, CL3091.Contig4_All, CL3706.Contig1_All, CL3884.Contig2_All, CL4057.Contig1_All, CL4090.Contig2_All, CL4459.Contig1_All, CL4576.Contig1_All, CL4736.Contig1_All, CL4736.Contig2_All, CL504.Contig1_All, CL504.Contig2_All, Unigene10026_All, Unigene10296_All, Unigene10483_All, Unigene11240_All, Unigene11282_All, Unigene11879_All, Unigene11899_All, Unigene1189_All, Unigene12028_All, Unigene12168_All, Unigene12209_All, Unigene12302_All, Unigene12423_All, Unigene12810_All, Unigene12923_All, Unigene13508_All, Unigene13589_All, Unigene1479_All, Unigene15969_All, Unigene1741_All, Unigene17602_All, Unigene18095_All, Unigene18114_All, Unigene18707_All, Unigene20095_All, Unigene2961_All, Unigene2982_All, Unigene3351_All, Unigene3730_All, Unigene3982_All, Unigene44_All, Unigene4921_All, Unigene6915_All, Unigene9028_All, Unigene925_All, Unigene9928_All</p>                                                                                                                                                                                                                                                                                                                                                                                                                                                                                                                                                                                                                                                                                                                                                                                                                                                                                                                                                                                                                                                                                                                                                                                                                                                                                                                                                                                                                                                                                                                                                                                                                                                                                                      |

|    |                                        |                                                                                                                                                                                                                                                                                                                                                                                                                                                                                                                                                                                                                                                                                                                                                                                                                                                                                                                                                                                                                                                                                                                                                                                                                                                                                                                                                                                                                                                                                                                                                                                                                                                                                                                                                                                                                                                                                                                                                                                                                                                                                                                                                                                                                                                                                                                                                                                                                                                                                                                                                                                                                                                                                                                                                                                                                                                                                                                                                                                                                                                                                                                                                                                                                                                                                                                                                                                                                                                                                                                                                                                                                                                                               |
|----|----------------------------------------|-------------------------------------------------------------------------------------------------------------------------------------------------------------------------------------------------------------------------------------------------------------------------------------------------------------------------------------------------------------------------------------------------------------------------------------------------------------------------------------------------------------------------------------------------------------------------------------------------------------------------------------------------------------------------------------------------------------------------------------------------------------------------------------------------------------------------------------------------------------------------------------------------------------------------------------------------------------------------------------------------------------------------------------------------------------------------------------------------------------------------------------------------------------------------------------------------------------------------------------------------------------------------------------------------------------------------------------------------------------------------------------------------------------------------------------------------------------------------------------------------------------------------------------------------------------------------------------------------------------------------------------------------------------------------------------------------------------------------------------------------------------------------------------------------------------------------------------------------------------------------------------------------------------------------------------------------------------------------------------------------------------------------------------------------------------------------------------------------------------------------------------------------------------------------------------------------------------------------------------------------------------------------------------------------------------------------------------------------------------------------------------------------------------------------------------------------------------------------------------------------------------------------------------------------------------------------------------------------------------------------------------------------------------------------------------------------------------------------------------------------------------------------------------------------------------------------------------------------------------------------------------------------------------------------------------------------------------------------------------------------------------------------------------------------------------------------------------------------------------------------------------------------------------------------------------------------------------------------------------------------------------------------------------------------------------------------------------------------------------------------------------------------------------------------------------------------------------------------------------------------------------------------------------------------------------------------------------------------------------------------------------------------------------------------------|
| 80 | <a href="#">MAPK signaling pathway</a> | <p>CL1054.Contig1_All, CL1054.Contig2_All, CL1066.Contig1_All, CL1066.Contig2_All, CL1120.Contig2_All, CL1390.Contig4_All, CL1390.Contig5_All, CL1452.Contig1_All, CL1535.Contig3_All, CL1548.Contig2_All, CL1548.Contig3_All, CL1618.Contig2_All, CL1626.Contig4_All, CL1626.Contig8_All, CL1626.Contig9_All, CL1695.Contig8_All, CL173.Contig1_All, CL173.Contig2_All, CL1758.Contig2_All, CL1758.Contig3_All, CL1758.Contig4_All, CL1807.Contig1_All, CL1807.Contig2_All, CL1831.Contig1_All, CL1831.Contig2_All, CL1925.Contig1_All, CL1960.Contig1_All, CL1960.Contig2_All, CL1966.Contig2_All, CL199.Contig1_All, CL2052.Contig1_All, CL2052.Contig2_All, CL2129.Contig4_All, CL2165.Contig2_All, CL2182.Contig1_All, CL2182.Contig3_All, CL2182.Contig4_All, CL2380.Contig2_All, CL2426.Contig1_All, CL2426.Contig2_All, CL2432.Contig2_All, CL2505.Contig3_All, CL2505.Contig4_All, CL2522.Contig1_All, CL2522.Contig2_All, CL2522.Contig3_All, CL2642.Contig1_All, CL2642.Contig2_All, CL2686.Contig1_All, CL2686.Contig2_All, CL271.Contig2_All, CL3043.Contig2_All, CL3137.Contig2_All, CL3209.Contig1_All, CL3217.Contig2_All, CL3263.Contig1_All, CL3290.Contig2_All, CL3290.Contig3_All, CL3311.Contig1_All, CL3311.Contig2_All, CL358.Contig1_All, CL3622.Contig2_All, CL3673.Contig2_All, CL3678.Contig2_All, CL3868.Contig1_All, CL3868.Contig2_All, CL3868.Contig3_All, CL39.Contig1_All, CL39.Contig2_All, CL39.Contig3_All, CL39.Contig4_All, CL400.Contig1_All, CL400.Contig2_All, CL4177.Contig1_All, CL4190.Contig1_All, CL4204.Contig1_All, CL4204.Contig2_All, CL4224.Contig1_All, CL4224.Contig2_All, CL4224.Contig3_All, CL4271.Contig1_All, CL4439.Contig2_All, CL4521.Contig1_All, CL4521.Contig2_All, CL4521.Contig3_All, CL4521.Contig5_All, CL4736.Contig1_All, CL4736.Contig2_All, CL4787.Contig1_All, CL4815.Contig1_All, CL4815.Contig2_All, CL4896.Contig1_All, CL4918.Contig1_All, CL4966.Contig1_All, CL5064.Contig2_All, CL5115.Contig1_All, CL5232.Contig1_All, CL5232.Contig2_All, CL5256.Contig1_All, CL5256.Contig2_All, CL5256.Contig4_All, CL5310.Contig2_All, CL5337.Contig2_All, CL5382.Contig1_All, CL5391.Contig1_All, CL5391.Contig2_All, CL5469.Contig2_All, CL558.Contig1_All, CL558.Contig2_All, CL558.Contig4_All, CL642.Contig1_All, CL642.Contig2_All, CL821.Contig1_All, CL821.Contig2_All, CL860.Contig10_All, CL860.Contig8_All, CL860.Contig9_All, CL89.Contig1_All, CL89.Contig2_All, CL940.Contig3_All, CL940.Contig5_All, Unigene10174_All, Unigene10687_All, Unigene10766_All, Unigene10837_All, Unigene11222_All, Unigene1156_All, Unigene1169_All, Unigene11810_All, Unigene12139_All, Unigene12484_All, Unigene12671_All, Unigene12928_All, Unigene13036_All, Unigene13209_All, Unigene1326_All, Unigene13733_All, Unigene13853_All, Unigene1479_All, Unigene15587_All, Unigene15863_All, Unigene16093_All, Unigene17465_All, Unigene1757_All, Unigene17751_All, Unigene18535_All, Unigene18898_All, Unigene2032_All, Unigene20578_All, Unigene2067_All, Unigene220_All, Unigene2749_All, Unigene3029_All, Unigene3033_All, Unigene3034_All, Unigene3036_All, Unigene3037_All, Unigene3042_All, Unigene3070_All, Unigene3131_All, Unigene327_All, Unigene3724_All, Unigene3779_All, Unigene4112_All, Unigene4142_All, Unigene4359_All, Unigene4798_All, Unigene5246_All, Unigene5280_All, Unigene6017_All, Unigene6101_All, Unigene6265_All, Unigene6977_All, Unigene6999_All, Unigene7136_All, Unigene7702_All, Unigene78_All, Unigene8046_All, Unigene8205_All, Unigene8621_All, Unigene8701_All, Unigene8747_All, Unigene90_All, Unigene9719_All, Unigene9733_All, Unigene9867_All, Unigene9971_All</p> |
| 81 | <a href="#">Oocyte meiosis</a>         | <p>CL1286.Contig2_All, CL1452.Contig1_All, CL1563.Contig2_All, CL1766.Contig1_All, CL1823.Contig8_All, CL2131.Contig4_All, CL2131.Contig5_All, CL2131.Contig6_All, CL2131.Contig8_All, CL2400.Contig5_All, CL241.Contig1_All, CL241.Contig7_All, CL2416.Contig1_All, CL244.Contig2_All, CL2468.Contig1_All, CL2468.Contig2_All, CL249.Contig1_All, CL249.Contig3_All, CL249.Contig5_All, CL249.Contig6_All, CL2546.Contig1_All, CL2711.Contig1_All, CL2711.Contig2_All, CL2749.Contig2_All, CL2809.Contig2_All, CL2809.Contig3_All, CL2809.Contig8_All, CL2838.Contig1_All, CL2838.Contig2_All, CL2838.Contig4_All, CL2893.Contig1_All, CL2893.Contig2_All, CL2978.Contig2_All, CL2978.Contig3_All, CL3263.Contig1_All, CL3667.Contig1_All, CL3667.Contig2_All, CL3667.Contig3_All, CL3689.Contig2_All, CL4002.Contig1_All, CL4005.Contig2_All, CL4005.Contig3_All, CL4262.Contig2_All, CL4395.Contig1_All, CL44.Contig10_All, CL44.Contig12_All, CL44.Contig13_All, CL44.Contig16_All, CL44.Contig17_All, CL44.Contig18_All, CL44.Contig19_All, CL44.Contig1_All, CL44.Contig22_All, CL44.Contig23_All, CL44.Contig2_All, CL44.Contig3_All, CL44.Contig4_All, CL44.Contig5_All, CL44.Contig6_All, CL44.Contig8_All, CL44.Contig9_All, CL440.Contig3_All, CL440.Contig5_All, CL440.Contig6_All, CL4402.Contig1_All, CL4509.Contig1_All, CL4509.Contig2_All, CL4514.Contig2_All, CL4521.Contig1_All, CL4521.Contig2_All, CL4521.Contig3_All, CL4521.Contig5_All, CL4787.Contig1_All, CL4966.Contig1_All, CL5064.Contig2_All, CL5206.Contig1_All, CL5218.Contig1_All, CL5218.Contig2_All, CL691.Contig1_All, CL710.Contig2_All, CL741.Contig2_All, CL772.Contig1_All, CL772.Contig2_All, CL940.Contig3_All, CL940.Contig5_All, CL95.Contig1_All, Unigene10006_All, Unigene10242_All, Unigene10252_All, Unigene10253_All, Unigene10574_All, Unigene10876_All, Unigene11040_All, Unigene11054_All, Unigene1109_All, Unigene11321_All, Unigene11411_All, Unigene1168_All, Unigene1181_All, Unigene12161_All, Unigene1229_All, Unigene12315_All, Unigene12469_All, Unigene12522_All, Unigene12719_All, Unigene12740_All, Unigene12903_All, Unigene13421_All, Unigene13432_All, Unigene13853_All, Unigene1512_All, Unigene1538_All, Unigene16769_All, Unigene18319_All, Unigene18584_All, Unigene18993_All, Unigene1941_All, Unigene2029_All, Unigene2233_All, Unigene2434_All, Unigene2700_All, Unigene2863_All, Unigene3103_All, Unigene3779_All, Unigene3996_All, Unigene4013_All, Unigene4022_All, Unigene4112_All, Unigene47_All, Unigene4808_All, Unigene4935_All, Unigene4970_All, Unigene4975_All, Unigene5196_All, Unigene5675_All, Unigene5896_All, Unigene5897_All, Unigene6041_All, Unigene6253_All, Unigene6526_All, Unigene6655_All, Unigene6746_All, Unigene700_All, Unigene7299_All, Unigene7671_All, Unigene7704_All, Unigene7747_All, Unigene7759_All, Unigene7869_All, Unigene798_All, Unigene8075_All, Unigene9076_All, Unigene9091_All, Unigene93_All, Unigene9579_All, Unigene9733_All, Unigene9904_All</p>                                                                                                                                                                                                                                                                                                                                                                                                                                                                                                                                                                                                                                                    |
| 82 | <a href="#">Circadian rhythm - fly</a> | <p>CL1843.Contig3_All, CL3787.Contig1_All, CL3787.Contig2_All, Unigene11922_All, Unigene236_All, Unigene247_All, Unigene3715_All, Unigene7297_All, Unigene8784_All, Unigene9006_All</p>                                                                                                                                                                                                                                                                                                                                                                                                                                                                                                                                                                                                                                                                                                                                                                                                                                                                                                                                                                                                                                                                                                                                                                                                                                                                                                                                                                                                                                                                                                                                                                                                                                                                                                                                                                                                                                                                                                                                                                                                                                                                                                                                                                                                                                                                                                                                                                                                                                                                                                                                                                                                                                                                                                                                                                                                                                                                                                                                                                                                                                                                                                                                                                                                                                                                                                                                                                                                                                                                                       |
| 83 | <a href="#">Leishmaniasis</a>          | <p>CL1085.Contig3_All, CL2182.Contig1_All, CL2182.Contig3_All, CL2182.Contig4_All, CL39.Contig1_All, CL39.Contig2_All, CL39.Contig3_All, CL39.Contig4_All, CL400.Contig1_All, CL400.Contig2_All, CL4736.Contig1_All, CL4736.Contig2_All, CL4966.Contig1_All, CL5391.Contig1_All, CL5391.Contig2_All, CL940.Contig3_All, CL940.Contig5_All, Unigene1479_All, Unigene1757_All, Unigene18898_All, Unigene20095_All, Unigene3131_All, Unigene3945_All, Unigene4207_All, Unigene6101_All, Unigene8246_All</p>                                                                                                                                                                                                                                                                                                                                                                                                                                                                                                                                                                                                                                                                                                                                                                                                                                                                                                                                                                                                                                                                                                                                                                                                                                                                                                                                                                                                                                                                                                                                                                                                                                                                                                                                                                                                                                                                                                                                                                                                                                                                                                                                                                                                                                                                                                                                                                                                                                                                                                                                                                                                                                                                                                                                                                                                                                                                                                                                                                                                                                                                                                                                                                      |

|    |                                                       |                                                                                                                                                                                                                                                                                                                                                                                                                                                                                                                                                                                                                                                                                                                                                                                                                                                                                                                                                                                                                                                                                                                                                                                                                                                                                                                                                                                                                                                                                                                                                                                                                                                                                                                                                                                                                                                                                                                                                                                                                                                                                                                                                                                                                                                                                                                                                                                                                                                                                                                                                                                                                                                                        |
|----|-------------------------------------------------------|------------------------------------------------------------------------------------------------------------------------------------------------------------------------------------------------------------------------------------------------------------------------------------------------------------------------------------------------------------------------------------------------------------------------------------------------------------------------------------------------------------------------------------------------------------------------------------------------------------------------------------------------------------------------------------------------------------------------------------------------------------------------------------------------------------------------------------------------------------------------------------------------------------------------------------------------------------------------------------------------------------------------------------------------------------------------------------------------------------------------------------------------------------------------------------------------------------------------------------------------------------------------------------------------------------------------------------------------------------------------------------------------------------------------------------------------------------------------------------------------------------------------------------------------------------------------------------------------------------------------------------------------------------------------------------------------------------------------------------------------------------------------------------------------------------------------------------------------------------------------------------------------------------------------------------------------------------------------------------------------------------------------------------------------------------------------------------------------------------------------------------------------------------------------------------------------------------------------------------------------------------------------------------------------------------------------------------------------------------------------------------------------------------------------------------------------------------------------------------------------------------------------------------------------------------------------------------------------------------------------------------------------------------------------|
| 84 | <a href="#">p53 signaling pathway</a>                 | CL131.Contig1_All, CL131.Contig2_All, CL1766.Contig1_All, CL2022.Contig1_All, CL2176.Contig3_All, CL2207.Contig2_All, CL2552.Contig3_All, CL268.Contig2_All, CL2882.Contig1_All, CL2882.Contig2_All, CL372.Contig1_All, CL4366.Contig1_All, CL5299.Contig1_All, CL851.Contig3_All, Unigene10252_All, Unigene10253_All, Unigene10735_All, Unigene11384_All, Unigene11724_All, Unigene11895_All, Unigene12099_All, Unigene12161_All, Unigene12188_All, Unigene12469_All, Unigene13421_All, Unigene1396_All, Unigene17102_All, Unigene17428_All, Unigene17702_All, Unigene19772_All, Unigene2374_All, Unigene3171_All, Unigene3833_All, Unigene4581_All, Unigene5554_All, Unigene5896_All, Unigene5995_All, Unigene6041_All, Unigene700_All, Unigene7049_All, Unigene7205_All, Unigene7299_All, Unigene9664_All                                                                                                                                                                                                                                                                                                                                                                                                                                                                                                                                                                                                                                                                                                                                                                                                                                                                                                                                                                                                                                                                                                                                                                                                                                                                                                                                                                                                                                                                                                                                                                                                                                                                                                                                                                                                                                                           |
| 85 | <a href="#">Neurotrophin signaling pathway</a>        | CL1009.Contig1_All, CL1066.Contig1_All, CL1066.Contig2_All, CL1066.Contig3_All, CL1104.Contig1_All, CL1104.Contig2_All, CL1104.Contig3_All, CL1104.Contig4_All, CL1104.Contig5_All, CL1104.Contig6_All, CL1104.Contig7_All, CL1104.Contig8_All, CL1104.Contig9_All, CL1286.Contig2_All, CL1535.Contig3_All, CL1690.Contig1_All, CL1695.Contig8_All, CL1807.Contig1_All, CL1807.Contig2_All, CL1823.Contig8_All, CL1843.Contig3_All, CL1874.Contig2_All, CL2131.Contig4_All, CL2131.Contig5_All, CL2131.Contig6_All, CL2131.Contig8_All, CL2222.Contig9_All, CL2426.Contig1_All, CL2426.Contig2_All, CL2468.Contig1_All, CL2468.Contig2_All, CL249.Contig1_All, CL249.Contig3_All, CL249.Contig5_All, CL249.Contig6_All, CL2541.Contig1_All, CL2541.Contig2_All, CL271.Contig2_All, CL2820.Contig3_All, CL3047.Contig1_All, CL3047.Contig2_All, CL3263.Contig1_All, CL3667.Contig1_All, CL3667.Contig2_All, CL3667.Contig3_All, CL367.Contig1_All, CL367.Contig2_All, CL367.Contig3_All, CL3673.Contig2_All, CL3979.Contig1_All, CL3979.Contig2_All, CL4158.Contig4_All, CL4158.Contig5_All, CL4158.Contig7_All, CL4395.Contig1_All, CL44.Contig10_All, CL44.Contig12_All, CL44.Contig13_All, CL44.Contig16_All, CL44.Contig17_All, CL44.Contig18_All, CL44.Contig19_All, CL44.Contig1_All, CL44.Contig22_All, CL44.Contig23_All, CL44.Contig2_All, CL44.Contig3_All, CL44.Contig4_All, CL44.Contig5_All, CL44.Contig6_All, CL44.Contig8_All, CL44.Contig9_All, CL4439.Contig2_All, CL4509.Contig1_All, CL4509.Contig2_All, CL4559.Contig2_All, CL4559.Contig3_All, CL4736.Contig1_All, CL4736.Contig2_All, CL4787.Contig1_All, CL4815.Contig1_All, CL4815.Contig2_All, CL4840.Contig2_All, CL4855.Contig1_All, CL4855.Contig2_All, CL4966.Contig1_All, CL5115.Contig1_All, CL5117.Contig1_All, CL5117.Contig2_All, CL695.Contig16_All, CL772.Contig1_All, CL772.Contig2_All, CL821.Contig1_All, CL821.Contig2_All, CL903.Contig1_All, Unigene10006_All, Unigene10174_All, Unigene10574_All, Unigene11054_All, Unigene11307_All, Unigene11922_All, Unigene12315_All, Unigene1236_All, Unigene12484_All, Unigene12522_All, Unigene12671_All, Unigene12719_All, Unigene13036_All, Unigene1479_All, Unigene1538_All, Unigene16769_All, Unigene1757_All, Unigene198_All, Unigene220_All, Unigene236_All, Unigene247_All, Unigene2749_All, Unigene3836_All, Unigene3996_All, Unigene4013_All, Unigene4940_All, Unigene5675_All, Unigene5808_All, Unigene6526_All, Unigene7016_All, Unigene7266_All, Unigene7297_All, Unigene7983_All, Unigene8046_All, Unigene8056_All, Unigene8205_All, Unigene8246_All, Unigene8747_All, Unigene8784_All, Unigene9050_All, Unigene9877_All |
| 86 | <a href="#">MAPK signaling pathway - fly</a>          | CL1480.Contig1_All, CL1480.Contig2_All, CL1548.Contig2_All, CL1548.Contig3_All, CL1807.Contig1_All, CL1807.Contig2_All, CL2222.Contig9_All, CL3830.Contig2_All, CL4439.Contig2_All, CL4787.Contig1_All, Unigene10174_All, Unigene10424_All, Unigene12671_All, Unigene13266_All, Unigene16846_All, Unigene16847_All, Unigene17796_All, Unigene3700_All, Unigene4079_All, Unigene4137_All, Unigene5695_All, Unigene699_All, Unigene7248_All, Unigene8045_All, Unigene8046_All, Unigene8087_All, Unigene8747_All                                                                                                                                                                                                                                                                                                                                                                                                                                                                                                                                                                                                                                                                                                                                                                                                                                                                                                                                                                                                                                                                                                                                                                                                                                                                                                                                                                                                                                                                                                                                                                                                                                                                                                                                                                                                                                                                                                                                                                                                                                                                                                                                                          |
| 87 | <a href="#">Glycosaminoglycan degradation</a>         | CL151.Contig1_All, CL151.Contig2_All, CL151.Contig4_All, CL3965.Contig1_All, CL3965.Contig2_All, CL3965.Contig4_All, CL5403.Contig2_All, Unigene17953_All, Unigene2281_All, Unigene5429_All, Unigene5646_All, Unigene6034_All, Unigene9260_All, Unigene9314_All                                                                                                                                                                                                                                                                                                                                                                                                                                                                                                                                                                                                                                                                                                                                                                                                                                                                                                                                                                                                                                                                                                                                                                                                                                                                                                                                                                                                                                                                                                                                                                                                                                                                                                                                                                                                                                                                                                                                                                                                                                                                                                                                                                                                                                                                                                                                                                                                        |
| 88 | <a href="#">Basal cell carcinoma</a>                  | CL1843.Contig3_All, CL2208.Contig1_All, CL2782.Contig1_All, CL2782.Contig2_All, CL2788.Contig2_All, CL3293.Contig1_All, CL3315.Contig3_All, CL3315.Contig4_All, CL3923.Contig1_All, CL3923.Contig3_All, CL4657.Contig2_All, CL5106.Contig1_All, CL5111.Contig1_All, CL63.Contig10_All, CL63.Contig9_All, Unigene1188_All, Unigene11922_All, Unigene150_All, Unigene18477_All, Unigene18765_All, Unigene236_All, Unigene247_All, Unigene2905_All, Unigene3975_All, Unigene4314_All, Unigene4731_All, Unigene5727_All, Unigene7163_All, Unigene7297_All, Unigene766_All, Unigene777_All, Unigene783_All, Unigene8014_All, Unigene8784_All, Unigene8861_All, Unigene9026_All, Unigene9111_All, Unigene9279_All                                                                                                                                                                                                                                                                                                                                                                                                                                                                                                                                                                                                                                                                                                                                                                                                                                                                                                                                                                                                                                                                                                                                                                                                                                                                                                                                                                                                                                                                                                                                                                                                                                                                                                                                                                                                                                                                                                                                                            |
| 89 | <a href="#">Phosphatidylinositol signaling system</a> | CL1066.Contig1_All, CL1066.Contig2_All, CL1066.Contig3_All, CL127.Contig13_All, CL1286.Contig2_All, CL1823.Contig8_All, CL2035.Contig1_All, CL2035.Contig4_All, CL2131.Contig4_All, CL2131.Contig5_All, CL2131.Contig6_All, CL2131.Contig8_All, CL2182.Contig1_All, CL2182.Contig3_All, CL2182.Contig4_All, CL2468.Contig1_All, CL2468.Contig2_All, CL2551.Contig1_All, CL2552.Contig3_All, CL2835.Contig1_All, CL2835.Contig2_All, CL2835.Contig3_All, CL2835.Contig4_All, CL2930.Contig5_All, CL2941.Contig1_All, CL2944.Contig1_All, CL2944.Contig2_All, CL309.Contig2_All, CL309.Contig3_All, CL309.Contig4_All, CL3142.Contig1_All, CL3142.Contig2_All, CL3163.Contig2_All, CL3410.Contig1_All, CL3410.Contig2_All, CL3505.Contig2_All, CL3578.Contig2_All, CL3578.Contig3_All, CL3578.Contig4_All, CL3667.Contig1_All, CL3667.Contig2_All, CL3667.Contig3_All, CL367.Contig1_All, CL367.Contig2_All, CL367.Contig3_All, CL3687.Contig1_All, CL3687.Contig2_All, CL39.Contig1_All, CL39.Contig2_All, CL39.Contig3_All, CL39.Contig4_All, CL3979.Contig1_All, CL3979.Contig2_All, CL4395.Contig1_All, CL4509.Contig1_All, CL4509.Contig2_All, CL4883.Contig1_All, CL4883.Contig2_All, CL5310.Contig2_All, CL5391.Contig1_All, CL5391.Contig2_All, CL542.Contig1_All, CL542.Contig2_All, CL688.Contig2_All, CL691.Contig1_All, CL691.Contig5_All, CL695.Contig16_All, CL725.Contig1_All, CL728.Contig1_All, CL737.Contig5_All, CL737.Contig6_All, CL772.Contig1_All, CL772.Contig2_All, CL940.Contig3_All, CL940.Contig5_All, CL959.Contig1_All, Unigene10006_All, Unigene10574_All, Unigene11054_All, Unigene11082_All, Unigene11319_All, Unigene12315_All, Unigene12719_All, Unigene12907_All, Unigene1290_All, Unigene13034_All, Unigene16769_All, Unigene18898_All, Unigene18993_All, Unigene3149_All, Unigene3996_All, Unigene4013_All, Unigene4053_All, Unigene4070_All, Unigene4159_All, Unigene4332_All, Unigene5675_All, Unigene5681_All, Unigene5811_All, Unigene6640_All, Unigene6996_All, Unigene6997_All, Unigene7000_All, Unigene8422_All, Unigene9067_All, Unigene9805_All                                                                                                                                                                                                                                                                                                                                                                                                                                                                                                                                                                           |

|    |                                         |                                                                                                                                                                                                                                                                                                                                                                                                                                                                                                                                                                                                                                                                                                                                                                                                                                                                                                                                                                                                                                                                                                                                                                                                                                                                                                                                                                                                                                                                                                                                                                                                                                                                                                                                                                                                                                                                                                                                                                           |
|----|-----------------------------------------|---------------------------------------------------------------------------------------------------------------------------------------------------------------------------------------------------------------------------------------------------------------------------------------------------------------------------------------------------------------------------------------------------------------------------------------------------------------------------------------------------------------------------------------------------------------------------------------------------------------------------------------------------------------------------------------------------------------------------------------------------------------------------------------------------------------------------------------------------------------------------------------------------------------------------------------------------------------------------------------------------------------------------------------------------------------------------------------------------------------------------------------------------------------------------------------------------------------------------------------------------------------------------------------------------------------------------------------------------------------------------------------------------------------------------------------------------------------------------------------------------------------------------------------------------------------------------------------------------------------------------------------------------------------------------------------------------------------------------------------------------------------------------------------------------------------------------------------------------------------------------------------------------------------------------------------------------------------------------|
| 90 | <a href="#">Fatty acid biosynthesis</a> | CL1876.Contig1_All, CL3657.Contig1_All, CL3657.Contig3_All, CL3832.Contig1_All, Unigene11940_All, Unigene16141_All, Unigene16942_All, Unigene17683_All, Unigene17892_All, Unigene18748_All, Unigene20691_All, Unigene3282_All, Unigene3345_All                                                                                                                                                                                                                                                                                                                                                                                                                                                                                                                                                                                                                                                                                                                                                                                                                                                                                                                                                                                                                                                                                                                                                                                                                                                                                                                                                                                                                                                                                                                                                                                                                                                                                                                            |
| 91 | <a href="#">Lysine degradation</a>      | CL1433.Contig1_All, CL1433.Contig2_All, CL1687.Contig4_All, CL1946.Contig1_All, CL1946.Contig3_All, CL2029.Contig4_All, CL2029.Contig6_All, CL2309.Contig2_All, CL2309.Contig3_All, CL231.Contig2_All, CL233.Contig1_All, CL2694.Contig1_All, CL2694.Contig3_All, CL2751.Contig1_All, CL2751.Contig2_All, CL29.Contig3_All, CL3027.Contig2_All, CL3027.Contig3_All, CL3027.Contig4_All, CL3045.Contig2_All, CL3046.Contig1_All, CL325.Contig1_All, CL3651.Contig1_All, CL3963.Contig1_All, CL3992.Contig1_All, CL3992.Contig2_All, CL4144.Contig3_All, CL4144.Contig4_All, CL4451.Contig1_All, CL4451.Contig2_All, CL4721.Contig2_All, CL4753.Contig1_All, CL4926.Contig1_All, CL5078.Contig12_All, CL520.Contig2_All, CL5326.Contig14_All, CL5435.Contig1_All, CL598.Contig2_All, Unigene10282_All, Unigene10299_All, Unigene10475_All, Unigene10476_All, Unigene10526_All, Unigene10686_All, Unigene10908_All, Unigene1197_All, Unigene1205_All, Unigene12187_All, Unigene12219_All, Unigene1229_All, Unigene12688_All, Unigene13152_All, Unigene13254_All, Unigene13410_All, Unigene13673_All, Unigene13773_All, Unigene14320_All, Unigene15270_All, Unigene15429_All, Unigene16206_All, Unigene1683_All, Unigene17117_All, Unigene17527_All, Unigene18101_All, Unigene18121_All, Unigene186_All, Unigene18911_All, Unigene19038_All, Unigene19160_All, Unigene2039_All, Unigene2144_All, Unigene214_All, Unigene2212_All, Unigene2215_All, Unigene2514_All, Unigene2525_All, Unigene2853_All, Unigene3028_All, Unigene3030_All, Unigene3040_All, Unigene3071_All, Unigene3450_All, Unigene4088_All, Unigene4251_All, Unigene4269_All, Unigene4853_All, Unigene5053_All, Unigene5075_All, Unigene5153_All, Unigene5305_All, Unigene5554_All, Unigene5717_All, Unigene5892_All, Unigene5989_All, Unigene6052_All, Unigene6105_All, Unigene6167_All, Unigene6360_All, Unigene7348_All, Unigene8563_All, Unigene86_All, Unigene9045_All, Unigene9308_All, Unigene9850_All |



CL1049.Contig4\_All, CL1055.Contig5\_All, CL1066.Contig1\_All, CL1066.Contig2\_All, CL1066.Contig3\_All, CL1091.Contig14\_All, CL1104.Contig3\_All, CL1104.Contig4\_All, CL1104.Contig5\_All, CL1104.Contig6\_All, CL1104.Contig7\_All, CL1104.Contig8\_All, CL1104.Contig9\_All, CL1170.Contig1\_All, CL1202.Contig2\_All, CL1202.Contig3\_All, CL1328.Contig2\_All, CL1387.Contig1\_All, CL1387.Contig3\_All, CL1436.Contig2\_All, CL1439.Contig1\_All, CL1439.Contig2\_All, CL1495.Contig1\_All, CL1495.Contig2\_All, CL1535.Contig3\_All, CL1548.Contig2\_All, CL1548.Contig3\_All, CL1584.Contig2\_All, CL1637.Contig1\_All, CL1648.Contig1\_All, CL1741.Contig1\_All, CL1789.Contig1\_All, CL1789.Contig2\_All, CL1807.Contig1\_All, CL1807.Contig2\_All, CL1843.Contig3\_All, CL1953.Contig1\_All, CL1960.Contig1\_All, CL1960.Contig2\_All, CL2034.Contig1\_All, CL2034.Contig2\_All, CL2038.Contig1\_All, CL2038.Contig7\_All, CL2052.Contig1\_All, CL2052.Contig2\_All, CL2066.Contig1\_All, CL209.Contig1\_All, CL209.Contig2\_All, CL209.Contig3\_All, CL209.Contig4\_All, CL2099.Contig1\_All, CL2170.Contig2\_All, CL2170.Contig5\_All, CL2182.Contig1\_All, CL2182.Contig3\_All, CL2182.Contig4\_All, CL2208.Contig1\_All, CL2287.Contig2\_All, CL2287.Contig4\_All, CL2331.Contig2\_All, CL2331.Contig3\_All, CL2346.Contig1\_All, CL2346.Contig2\_All, CL241.Contig1\_All, CL241.Contig7\_All, CL2411.Contig1\_All, CL2456.Contig3\_All, CL2505.Contig3\_All, CL2505.Contig4\_All, CL2552.Contig3\_All, CL2573.Contig2\_All, CL2573.Contig3\_All, CL2658.Contig1\_All, CL2658.Contig2\_All, CL271.Contig2\_All, CL2711.Contig1\_All, CL2711.Contig2\_All, CL2782.Contig1\_All, CL2782.Contig2\_All, CL2788.Contig2\_All, CL2793.Contig1\_All, CL2793.Contig2\_All, CL2882.Contig1\_All, CL2882.Contig2\_All, CL2927.Contig3\_All, CL2935.Contig1\_All, CL2935.Contig3\_All, CL3078.Contig1\_All, CL3162.Contig2\_All, CL3235.Contig1\_All, CL3235.Contig2\_All, CL3270.Contig1\_All, CL3270.Contig2\_All, CL3293.Contig1\_All, CL3315.Contig3\_All, CL3315.Contig4\_All, CL3327.Contig1\_All, CL3327.Contig2\_All, CL3371.Contig1\_All, CL3373.Contig1\_All, CL3373.Contig2\_All, CL3436.Contig1\_All, CL3436.Contig4\_All, CL3436.Contig9\_All, CL349.Contig12\_All, CL349.Contig3\_All, CL349.Contig5\_All, CL3567.Contig1\_All, CL3567.Contig2\_All, CL3567.Contig3\_All, CL3618.Contig1\_All, CL3632.Contig2\_All, CL3632.Contig3\_All, CL367.Contig1\_All, CL367.Contig2\_All, CL367.Contig3\_All, CL3788.Contig1\_All, CL3796.Contig2\_All, CL3796.Contig3\_All, CL3802.Contig2\_All, CL39.Contig1\_All, CL39.Contig2\_All, CL39.Contig3\_All, CL39.Contig4\_All, CL3923.Contig1\_All, CL3923.Contig3\_All, CL3979.Contig1\_All, CL3979.Contig2\_All, CL4158.Contig4\_All, CL4158.Contig7\_All, CL4271.Contig1\_All, CL4381.Contig1\_All, CL4439.Contig2\_All, CL4453.Contig1\_All, CL450.Contig10\_All, CL4510.Contig1\_All, CL4657.Contig2\_All, CL470.Contig1\_All, CL4736.Contig1\_All, CL4736.Contig2\_All, CL4787.Contig1\_All, CL4896.Contig1\_All, CL493.Contig2\_All, CL4969.Contig1\_All, CL4992.Contig1\_All, CL5048.Contig1\_All, CL5106.Contig1\_All, CL5111.Contig1\_All, CL5115.Contig1\_All, CL5204.Contig1\_All, CL5204.Contig2\_All, CL524.Contig10\_All, CL524.Contig11\_All, CL524.Contig12\_All, CL524.Contig13\_All, CL524.Contig14\_All, CL524.Contig15\_All, CL524.Contig16\_All, CL524.Contig17\_All, CL524.Contig18\_All, CL524.Contig1\_All, CL524.Contig3\_All, CL524.Contig4\_All, CL524.Contig5\_All, CL524.Contig6\_All, CL524.Contig9\_All, CL5268.Contig2\_All, CL5373.Contig1\_All, CL5373.Contig2\_All, CL5391.Contig1\_All, CL5391.Contig2\_All, CL5464.Contig1\_All, CL5464.Contig2\_All, CL5464.Contig3\_All, CL63.Contig10\_All, CL63.Contig9\_All, CL695.Contig16\_All, CL702.Contig2\_All, CL702.Contig3\_All, CL748.Contig1\_All, CL748.Contig3\_All, CL880.Contig3\_All, CL940.Contig3\_All, CL940.Contig5\_All, CL95.Contig1\_All, Unigene10001\_All, Unigene1000\_All, Unigene10095\_All, Unigene10096\_All, Unigene10174\_All, Unigene10316\_All, Unigene10318\_All, Unigene10381\_All, Unigene10724\_All, Unigene10876\_All, Unigene11000\_All, Unigene11020\_All, Unigene11053\_All, Unigene11160\_All, Unigene11307\_All, Unigene11358\_All, Unigene1150\_All, Unigene11511\_All, Unigene11538\_All, Unigene11543\_All, Unigene11544\_All, Unigene11588\_All, Unigene11724\_All, Unigene1188\_All, Unigene11916\_All, Unigene11922\_All, Unigene11923\_All, Unigene11949\_All, Unigene12008\_All, Unigene12099\_All, Unigene12155\_All, Unigene12188\_All, Unigene12533\_All, Unigene12660\_All, Unigene12671\_All, Unigene12692\_All, Unigene12710\_All, Unigene13036\_All, Unigene13476\_All, Unigene13505\_All, Unigene13588\_All, Unigene1385\_All, Unigene14177\_All, Unigene1479\_All, Unigene150\_All, Unigene15263\_All, Unigene15265\_All, Unigene15435\_All, Unigene15451\_All, Unigene15658\_All, Unigene15840\_All, Unigene1614\_All, Unigene16499\_All, Unigene1663\_All, Unigene1679\_All, Unigene16913\_All, Unigene16965\_All, Unigene16966\_All, Unigene1699\_All, Unigene1757\_All, Unigene17702\_All, Unigene17718\_All, Unigene17728\_All, Unigene17781\_All, Unigene18477\_All, Unigene18488\_All, Unigene18496\_All, Unigene18765\_All, Unigene18898\_All, Unigene19237\_All, Unigene19310\_All, Unigene19426\_All, Unigene19840\_All, Unigene198\_All, Unigene2050\_All, Unigene2190\_All, Unigene220\_All, Unigene236\_All, Unigene2374\_All, Unigene247\_All, Unigene2503\_All, Unigene2560\_All, Unigene2749\_All, Unigene28\_All, Unigene2905\_All, Unigene2914\_All, Unigene3123\_All, Unigene3168\_All, Unigene3184\_All, Unigene3193\_All, Unigene3403\_All, Unigene3689\_All, Unigene3889\_All, Unigene3945\_All, Unigene3975\_All, Unigene4084\_All, Unigene4137\_All, Unigene4142\_All, Unigene414\_All, Unigene4161\_All, Unigene4207\_All, Unigene4218\_All, Unigene4314\_All, Unigene4418\_All, Unigene4581\_All, Unigene4671\_All, Unigene4731\_All, Unigene4801\_All, Unigene4922\_All, Unigene5068\_All, Unigene5169\_All, Unigene5179\_All, Unigene54\_All, Unigene5727\_All, Unigene5781\_All, Unigene5789\_All, Unigene5799\_All, Unigene5808\_All, Unigene5870\_All, Unigene5896\_All, Unigene6041\_All, Unigene6222\_All, Unigene6614\_All, Unigene6780\_All, Unigene6797\_All, Unigene695\_All, Unigene699\_All, Unigene7018\_All, Unigene7054\_All, Unigene7106\_All, Unigene7163\_All, Unigene7220\_All, Unigene7287\_All, Unigene7297\_All, Unigene7299\_All, Unigene740\_All, Unigene7548\_All, Unigene7560\_All, Unigene766\_All, Unigene7777\_All, Unigene7777\_All, Unigene783\_All, Unigene7983\_All, Unigene8003\_All, Unigene8014\_All, Unigene8046\_All, Unigene8102\_All, Unigene824\_All, Unigene8277\_All, Unigene8399\_All, Unigene8514\_All, Unigene8562\_All, Unigene8747\_All, Unigene8784\_All, Unigene8861\_All, Unigene8972\_All, Unigene8997\_All, Unigene9026\_All, Unigene9028\_All, Unigene9039\_All, Unigene9050\_All, Unigene908\_All, Unigene90\_All, Unigene9111\_All, Unigene9279\_All, Unigene9284\_All, Unigene9298\_All, Unigene9611\_All, Unigene9641\_All, Unigene9740\_All, Unigene9877\_All, Unigene9988\_All

|    |                                                     |                                                                                                                                                                                                                                                                                                                                                                                                                                                                                                                                                                                                                                                                                                                                                                                                                                                                                                                                                                                                                                                                                                                                                                                                                                             |
|----|-----------------------------------------------------|---------------------------------------------------------------------------------------------------------------------------------------------------------------------------------------------------------------------------------------------------------------------------------------------------------------------------------------------------------------------------------------------------------------------------------------------------------------------------------------------------------------------------------------------------------------------------------------------------------------------------------------------------------------------------------------------------------------------------------------------------------------------------------------------------------------------------------------------------------------------------------------------------------------------------------------------------------------------------------------------------------------------------------------------------------------------------------------------------------------------------------------------------------------------------------------------------------------------------------------------|
| 93 | <a href="#">ABC transporters</a>                    | CL197.Contig1_All, CL197.Contig2_All, CL197.Contig3_All, CL227.Contig2_All, CL227.Contig3_All, CL227.Contig4_All, CL227.Contig5_All, CL247.Contig1_All, CL247.Contig2_All, CL2589.Contig1_All, CL2589.Contig2_All, CL2834.Contig1_All, CL2834.Contig2_All, CL3010.Contig1_All, CL3954.Contig1_All, CL4272.Contig2_All, CL4461.Contig1_All, CL4461.Contig2_All, CL4461.Contig3_All, CL460.Contig1_All, CL460.Contig2_All, CL460.Contig3_All, CL4976.Contig2_All, CL5235.Contig1_All, CL5235.Contig2_All, CL5362.Contig2_All, CL738.Contig16_All, CL738.Contig2_All, CL738.Contig3_All, CL798.Contig1_All, CL798.Contig2_All, CL798.Contig3_All, CL89.Contig1_All, CL89.Contig2_All, Unigene11915_All, Unigene15238_All, Unigene15239_All, Unigene18165_All, Unigene18195_All, Unigene18196_All, Unigene18766_All, Unigene2032_All, Unigene2054_All, Unigene2699_All, Unigene3196_All, Unigene3824_All, Unigene4537_All, Unigene4_All, Unigene5058_All, Unigene5639_All, Unigene5768_All, Unigene5_All, Unigene6229_All, Unigene6_All, Unigene7006_All, Unigene7082_All, Unigene7211_All, Unigene7651_All, Unigene784_All, Unigene7979_All, Unigene7_All, Unigene8194_All, Unigene8621_All, Unigene8910_All, Unigene9025_All, Unigene9078_All |
| 94 | <a href="#">Collecting duct acid secretion</a>      | CL2150.Contig3_All, CL2634.Contig1_All, CL2634.Contig2_All, CL3091.Contig1_All, CL3091.Contig2_All, CL3091.Contig3_All, CL3091.Contig4_All, CL4090.Contig2_All, CL4459.Contig1_All, CL974.Contig2_All, Unigene10026_All, Unigene10483_All, Unigene11240_All, Unigene11899_All, Unigene1189_All, Unigene12028_All, Unigene12168_All, Unigene12209_All, Unigene12302_All, Unigene12423_All, Unigene13508_All, Unigene13589_All, Unigene15969_All, Unigene1741_All, Unigene17602_All, Unigene18707_All, Unigene2002_All, Unigene2003_All, Unigene3351_All, Unigene4211_All, Unigene7061_All, Unigene925_All, Unigene9668_All                                                                                                                                                                                                                                                                                                                                                                                                                                                                                                                                                                                                                   |
| 95 | <a href="#">Caffeine metabolism</a>                 | CL1305.Contig1_All, CL1711.Contig1_All, CL1711.Contig2_All, CL2532.Contig1_All, CL2707.Contig1_All, CL3511.Contig2_All, CL731.Contig1_All, Unigene16322_All, Unigene18597_All, Unigene432_All, Unigene5060_All, Unigene5600_All, Unigene7663_All                                                                                                                                                                                                                                                                                                                                                                                                                                                                                                                                                                                                                                                                                                                                                                                                                                                                                                                                                                                            |
| 96 | <a href="#">Osteoclast differentiation</a>          | CL1066.Contig1_All, CL1066.Contig2_All, CL1066.Contig3_All, CL1535.Contig3_All, CL1831.Contig1_All, CL1831.Contig2_All, CL2129.Contig4_All, CL257.Contig1_All, CL257.Contig2_All, CL3079.Contig1_All, CL3079.Contig2_All, CL3079.Contig3_All, CL3079.Contig6_All, CL3567.Contig1_All, CL3567.Contig2_All, CL3567.Contig3_All, CL367.Contig1_All, CL367.Contig2_All, CL367.Contig3_All, CL3920.Contig2_All, CL4057.Contig1_All, CL4190.Contig1_All, CL4271.Contig1_All, CL4362.Contig1_All, CL4362.Contig2_All, CL4521.Contig1_All, CL4521.Contig2_All, CL4521.Contig3_All, CL4521.Contig5_All, CL4736.Contig1_All, CL4736.Contig2_All, CL4787.Contig1_All, CL4815.Contig1_All, CL4815.Contig2_All, CL4966.Contig1_All, CL504.Contig1_All, CL504.Contig2_All, CL5064.Contig2_All, CL5115.Contig1_All, CL695.Contig16_All, Unigene10174_All, Unigene10296_All, Unigene13853_All, Unigene1479_All, Unigene1757_All, Unigene18114_All, Unigene220_All, Unigene2749_All, Unigene3131_All, Unigene3982_All, Unigene5869_All, Unigene7217_All, Unigene763_All, Unigene8046_All                                                                                                                                                                     |
| 97 | <a href="#">Pentose phosphate pathway</a>           | CL2512.Contig2_All, CL4091.Contig1_All, CL4091.Contig2_All, CL4358.Contig1_All, Unigene10489_All, Unigene11782_All, Unigene11830_All, Unigene11894_All, Unigene12035_All, Unigene12066_All, Unigene12144_All, Unigene12227_All, Unigene12267_All, Unigene12372_All, Unigene12580_All, Unigene13066_All, Unigene13088_All, Unigene13119_All, Unigene13375_All, Unigene14160_All, Unigene1538_All, Unigene16591_All, Unigene16824_All, Unigene17282_All, Unigene17700_All, Unigene17838_All, Unigene18003_All, Unigene18004_All, Unigene18248_All, Unigene18487_All, Unigene18651_All, Unigene19184_All, Unigene3105_All, Unigene4267_All, Unigene6526_All, Unigene7735_All, Unigene7814_All                                                                                                                                                                                                                                                                                                                                                                                                                                                                                                                                                  |
| 98 | <a href="#">Proteasome</a>                          | CL2483.Contig2_All, CL2513.Contig1_All, CL2513.Contig2_All, CL2855.Contig1_All, CL2855.Contig3_All, CL3332.Contig1_All, CL4003.Contig1_All, CL4003.Contig2_All, CL5242.Contig1_All, CL619.Contig1_All, Unigene10165_All, Unigene10166_All, Unigene10224_All, Unigene10225_All, Unigene10239_All, Unigene10240_All, Unigene10407_All, Unigene10408_All, Unigene10602_All, Unigene11073_All, Unigene11928_All, Unigene11936_All, Unigene11956_All, Unigene11964_All, Unigene11999_All, Unigene12009_All, Unigene12165_All, Unigene12197_All, Unigene12323_All, Unigene12345_All, Unigene12364_All, Unigene12393_All, Unigene12467_All, Unigene12472_All, Unigene12787_All, Unigene13030_All, Unigene13077_All, Unigene13108_All, Unigene13158_All, Unigene13168_All, Unigene13185_All, Unigene14201_All, Unigene2306_All, Unigene4813_All, Unigene4891_All, Unigene6066_All, Unigene6964_All, Unigene7198_All, Unigene7327_All, Unigene7526_All, Unigene7817_All, Unigene7855_All, Unigene8804_All, Unigene8924_All, Unigene9194_All                                                                                                                                                                                                          |
| 99 | <a href="#">Complement and coagulation cascades</a> | CL1085.Contig3_All, CL1444.Contig3_All, CL2156.Contig2_All, CL326.Contig1_All, CL3298.Contig1_All, CL4597.Contig2_All, CL4690.Contig1_All, CL4690.Contig2_All, CL4699.Contig1_All, CL4984.Contig2_All, Unigene10345_All, Unigene10833_All, Unigene10848_All, Unigene10991_All, Unigene1103_All, Unigene1163_All, Unigene11660_All, Unigene12605_All, Unigene13162_All, Unigene15513_All, Unigene17970_All, Unigene17986_All, Unigene18112_All, Unigene352_All, Unigene3902_All, Unigene5877_All, Unigene6063_All, Unigene7108_All, Unigene71_All, Unigene8217_All, Unigene8848_All                                                                                                                                                                                                                                                                                                                                                                                                                                                                                                                                                                                                                                                          |

|     |                                                         |                                                                                                                                                                                                                                                                                                                                                                                                                                                                                                                                                                                                                                                                                                                                                                                                                                                                                                                                                                                                                                                                                                                                                                                                                                                                                                                                                                                                                                                                                                                                                                                                                                                                                                                                                                                                                                                                                                                                                                                                                                                                                                                                                                                                                                                                      |
|-----|---------------------------------------------------------|----------------------------------------------------------------------------------------------------------------------------------------------------------------------------------------------------------------------------------------------------------------------------------------------------------------------------------------------------------------------------------------------------------------------------------------------------------------------------------------------------------------------------------------------------------------------------------------------------------------------------------------------------------------------------------------------------------------------------------------------------------------------------------------------------------------------------------------------------------------------------------------------------------------------------------------------------------------------------------------------------------------------------------------------------------------------------------------------------------------------------------------------------------------------------------------------------------------------------------------------------------------------------------------------------------------------------------------------------------------------------------------------------------------------------------------------------------------------------------------------------------------------------------------------------------------------------------------------------------------------------------------------------------------------------------------------------------------------------------------------------------------------------------------------------------------------------------------------------------------------------------------------------------------------------------------------------------------------------------------------------------------------------------------------------------------------------------------------------------------------------------------------------------------------------------------------------------------------------------------------------------------------|
| 100 | <a href="#">Axon guidance</a>                           | <p>CL1156.Contig2_All, CL1156.Contig5_All, CL1227.Contig1_All, CL1227.Contig2_All, CL1335.Contig1_All, CL1535.Contig3_All, CL1681.Contig4_All, CL1681.Contig5_All, CL1764.Contig2_All, CL1831.Contig1_All, CL1831.Contig2_All, CL1843.Contig3_All, CL2066.Contig1_All, CL2224.Contig2_All, CL2224.Contig3_All, CL2224.Contig4_All, CL2253.Contig2_All, CL2346.Contig1_All, CL2346.Contig2_All, CL2541.Contig1_All, CL2541.Contig2_All, CL257.Contig1_All, CL257.Contig2_All, CL2626.Contig1_All, CL2658.Contig1_All, CL2658.Contig2_All, CL271.Contig2_All, CL2722.Contig1_All, CL2977.Contig1_All, CL2977.Contig2_All, CL3042.Contig1_All, CL3042.Contig3_All, CL3196.Contig1_All, CL3196.Contig2_All, CL3321.Contig3_All, CL3636.Contig1_All, CL3636.Contig4_All, CL3636.Contig5_All, CL3636.Contig6_All, CL3636.Contig8_All, CL3636.Contig9_All, CL3823.Contig1_All, CL3823.Contig2_All, CL4095.Contig1_All, CL4190.Contig1_All, CL4381.Contig1_All, CL4439.Contig2_All, CL4521.Contig1_All, CL4521.Contig2_All, CL4521.Contig3_All, CL4521.Contig5_All, CL4941.Contig1_All, CL5005.Contig1_All, CL5005.Contig2_All, CL5064.Contig2_All, CL5469.Contig2_All, CL566.Contig1_All, CL748.Contig1_All, CL748.Contig3_All, CL95.Contig1_All, CL986.Contig2_All, Unigene1000_All, Unigene1030_All, Unigene10682_All, Unigene10775_All, Unigene109_All, Unigene11052_All, Unigene1123_All, Unigene11307_All, Unigene11607_All, Unigene11922_All, Unigene1227_All, Unigene12344_All, Unigene12671_All, Unigene13853_All, Unigene1629_All, Unigene1679_All, Unigene16906_All, Unigene16965_All, Unigene17102_All, Unigene17637_All, Unigene17967_All, Unigene18644_All, Unigene198_All, Unigene2015_All, Unigene21521_All, Unigene236_All, Unigene247_All, Unigene2980_All, Unigene3945_All, Unigene4068_All, Unigene4081_All, Unigene4207_All, Unigene4244_All, Unigene5052_All, Unigene5120_All, Unigene5521_All, Unigene5808_All, Unigene6015_All, Unigene6017_All, Unigene6217_All, Unigene6245_All, Unigene6432_All, Unigene7011_All, Unigene7013_All, Unigene7063_All, Unigene7286_All, Unigene7297_All, Unigene7983_All, Unigene8044_All, Unigene8076_All, Unigene8725_All, Unigene8784_All, Unigene9050_All, Unigene9200_All, Unigene9719_All, Unigene9877_All</p> |
| 101 | <a href="#">Base excision repair</a>                    | <p>CL1070.Contig6_All, CL1070.Contig7_All, CL1395.Contig2_All, CL2986.Contig2_All, CL4232.Contig1_All, CL4232.Contig2_All, CL4278.Contig2_All, CL4567.Contig2_All, CL4948.Contig1_All, CL4989.Contig1_All, CL4989.Contig2_All, CL5326.Contig17_All, CL5427.Contig2_All, CL91.Contig1_All, Unigene12361_All, Unigene13367_All, Unigene15790_All, Unigene17292_All, Unigene18127_All, Unigene18761_All, Unigene20279_All, Unigene2890_All, Unigene3632_All, Unigene4102_All, Unigene4925_All, Unigene5175_All, Unigene6911_All, Unigene8228_All, Unigene9237_All, Unigene9545_All</p>                                                                                                                                                                                                                                                                                                                                                                                                                                                                                                                                                                                                                                                                                                                                                                                                                                                                                                                                                                                                                                                                                                                                                                                                                                                                                                                                                                                                                                                                                                                                                                                                                                                                                  |
| 102 | <a href="#">Progesterone-mediated oocyte maturation</a> | <p>CL1066.Contig1_All, CL1066.Contig2_All, CL1066.Contig3_All, CL1452.Contig1_All, CL1660.Contig10_All, CL1660.Contig15_All, CL1660.Contig16_All, CL1660.Contig1_All, CL1660.Contig3_All, CL1660.Contig5_All, CL1660.Contig6_All, CL1660.Contig7_All, CL1660.Contig8_All, CL1660.Contig9_All, CL1766.Contig1_All, CL241.Contig1_All, CL241.Contig7_All, CL2416.Contig1_All, CL2770.Contig1_All, CL2770.Contig2_All, CL2809.Contig2_All, CL2809.Contig3_All, CL2809.Contig8_All, CL2978.Contig2_All, CL2978.Contig3_All, CL3263.Contig1_All, CL367.Contig1_All, CL367.Contig2_All, CL367.Contig3_All, CL4005.Contig2_All, CL4005.Contig3_All, CL4262.Contig2_All, CL440.Contig3_All, CL440.Contig5_All, CL440.Contig6_All, CL4439.Contig2_All, CL4615.Contig2_All, CL4787.Contig1_All, CL4966.Contig1_All, CL5064.Contig2_All, CL5115.Contig1_All, CL5206.Contig1_All, CL5218.Contig1_All, CL5218.Contig2_All, CL5304.Contig1_All, CL570.Contig1_All, CL570.Contig2_All, CL695.Contig16_All, CL702.Contig2_All, CL702.Contig3_All, CL710.Contig2_All, CL940.Contig3_All, CL940.Contig5_All, CL95.Contig1_All, Unigene10019_All, Unigene10252_All, Unigene10253_All, Unigene11000_All, Unigene11053_All, Unigene1109_All, Unigene11227_All, Unigene11228_All, Unigene1125_All, Unigene1181_All, Unigene12161_All, Unigene1229_All, Unigene12469_All, Unigene12671_All, Unigene13421_All, Unigene15263_All, Unigene15265_All, Unigene16349_All, Unigene16499_All, Unigene17781_All, Unigene17863_All, Unigene18319_All, Unigene18584_All, Unigene20083_All, Unigene20226_All, Unigene2029_All, Unigene220_All, Unigene2700_All, Unigene2749_All, Unigene2863_All, Unigene3779_All, Unigene4112_All, Unigene47_All, Unigene4808_All, Unigene5521_All, Unigene5896_All, Unigene5897_All, Unigene6217_All, Unigene700_All, Unigene756_All, Unigene7747_All, Unigene7869_All, Unigene8075_All, Unigene8747_All, Unigene93_All, Unigene9579_All, Unigene9733_All</p>                                                                                                                                                                                                                                                                                                         |
| 103 | <a href="#">Measles</a>                                 | <p>CL1054.Contig1_All, CL1054.Contig2_All, CL1066.Contig1_All, CL1066.Contig2_All, CL1066.Contig3_All, CL1843.Contig3_All, CL1925.Contig1_All, CL1953.Contig1_All, CL2038.Contig1_All, CL2038.Contig7_All, CL2165.Contig2_All, CL2306.Contig2_All, CL257.Contig1_All, CL257.Contig2_All, CL263.Contig3_All, CL263.Contig5_All, CL2686.Contig1_All, CL2686.Contig2_All, CL3047.Contig1_All, CL3047.Contig2_All, CL3083.Contig1_All, CL3083.Contig3_All, CL345.Contig1_All, CL3632.Contig2_All, CL3632.Contig3_All, CL367.Contig1_All, CL367.Contig2_All, CL367.Contig3_All, CL3853.Contig1_All, CL4855.Contig1_All, CL4855.Contig2_All, CL5051.Contig2_All, CL5256.Contig1_All, CL5256.Contig2_All, CL5256.Contig4_All, CL558.Contig1_All, CL558.Contig2_All, CL558.Contig4_All, CL695.Contig16_All, Unigene10015_All, Unigene10258_All, Unigene10619_All, Unigene10837_All, Unigene11152_All, Unigene11153_All, Unigene11781_All, Unigene11922_All, Unigene12006_All, Unigene12099_All, Unigene12259_All, Unigene1247_All, Unigene12591_All, Unigene12827_All, Unigene12894_All, Unigene13134_All, Unigene13513_All, Unigene14208_All, Unigene15587_All, Unigene15863_All, Unigene16093_All, Unigene1757_All, Unigene17810_All, Unigene18535_All, Unigene20095_All, Unigene236_All, Unigene2374_All, Unigene247_All, Unigene2749_All, Unigene3131_All, Unigene3153_All, Unigene3168_All, Unigene5896_All, Unigene6041_All, Unigene7297_All, Unigene7299_All, Unigene8056_All, Unigene8246_All, Unigene8784_All, Unigene9971_All</p>                                                                                                                                                                                                                                                                                                                                                                                                                                                                                                                                                                                                                                                                                                                                  |
| 104 | <a href="#">Nucleotide excision repair</a>              | <p>CL1395.Contig2_All, CL2217.Contig1_All, CL2217.Contig2_All, CL2217.Contig3_All, CL2340.Contig2_All, CL2986.Contig2_All, CL3372.Contig1_All, CL4023.Contig1_All, CL4023.Contig2_All, CL4278.Contig2_All, CL4288.Contig1_All, CL4288.Contig2_All, CL4288.Contig3_All, CL4319.Contig2_All, CL4989.Contig1_All, CL4989.Contig2_All, CL856.Contig1_All, CL91.Contig1_All, Unigene10181_All, Unigene10182_All, Unigene10261_All, Unigene10876_All, Unigene12220_All, Unigene12361_All, Unigene12386_All, Unigene15790_All, Unigene1638_All, Unigene1696_All, Unigene17292_All, Unigene18127_All, Unigene18761_All, Unigene20279_All, Unigene2243_All, Unigene2862_All, Unigene2890_All, Unigene4102_All, Unigene567_All, Unigene6125_All, Unigene7699_All, Unigene8025_All, Unigene806_All, Unigene8228_All, Unigene8709_All, Unigene8784_All, Unigene9072_All, Unigene9245_All, Unigene9503_All</p>                                                                                                                                                                                                                                                                                                                                                                                                                                                                                                                                                                                                                                                                                                                                                                                                                                                                                                                                                                                                                                                                                                                                                                                                                                                                                                                                                                    |

|     |                                                             |                                                                                                                                                                                                                                                                                                                                                                                                                                                                                                                                                                                                                                                                                                                                                                                                                                                                                                                                                                                                                                                                                                                                                                                                                                                                                                                                                                                                                                                                                                                                                                                                                                                                                                                                                                                                                                                                                                                                                                                                                                                                                                                                                                                                                                                                                                                                                                                                                                                                                                                                                                                                                                                                                                                                                                                                                                                                                                                                                                                                                                                                                                                                                                                                                                                                                                                                                                                                                                                                                                                                                                                                                                                                                                                                                                                                                                                                                                                                                                                                                                                                          |
|-----|-------------------------------------------------------------|--------------------------------------------------------------------------------------------------------------------------------------------------------------------------------------------------------------------------------------------------------------------------------------------------------------------------------------------------------------------------------------------------------------------------------------------------------------------------------------------------------------------------------------------------------------------------------------------------------------------------------------------------------------------------------------------------------------------------------------------------------------------------------------------------------------------------------------------------------------------------------------------------------------------------------------------------------------------------------------------------------------------------------------------------------------------------------------------------------------------------------------------------------------------------------------------------------------------------------------------------------------------------------------------------------------------------------------------------------------------------------------------------------------------------------------------------------------------------------------------------------------------------------------------------------------------------------------------------------------------------------------------------------------------------------------------------------------------------------------------------------------------------------------------------------------------------------------------------------------------------------------------------------------------------------------------------------------------------------------------------------------------------------------------------------------------------------------------------------------------------------------------------------------------------------------------------------------------------------------------------------------------------------------------------------------------------------------------------------------------------------------------------------------------------------------------------------------------------------------------------------------------------------------------------------------------------------------------------------------------------------------------------------------------------------------------------------------------------------------------------------------------------------------------------------------------------------------------------------------------------------------------------------------------------------------------------------------------------------------------------------------------------------------------------------------------------------------------------------------------------------------------------------------------------------------------------------------------------------------------------------------------------------------------------------------------------------------------------------------------------------------------------------------------------------------------------------------------------------------------------------------------------------------------------------------------------------------------------------------------------------------------------------------------------------------------------------------------------------------------------------------------------------------------------------------------------------------------------------------------------------------------------------------------------------------------------------------------------------------------------------------------------------------------------------------------------|
| 105 | <a href="#">Glyoxylate and dicarboxylate metabolism</a>     | CL3283.Contig1_All, CL4534.Contig2_All, CL4534.Contig3_All, CL4686.Contig2_All, CL4971.Contig2_All, CL5301.Contig1_All, CL5301.Contig2_All, Unigene10287_All, Unigene10412_All, Unigene10732_All, Unigene10818_All, Unigene10909_All, Unigene10910_All, Unigene10929_All, Unigene10954_All, Unigene11253_All, Unigene11254_All, Unigene11277_All, Unigene11278_All, Unigene11279_All, Unigene11838_All, Unigene11854_All, Unigene12053_All, Unigene12071_All, Unigene12169_All, Unigene12219_All, Unigene12293_All, Unigene12362_All, Unigene12470_All, Unigene12585_All, Unigene12587_All, Unigene12738_All, Unigene12869_All, Unigene13080_All, Unigene13117_All, Unigene13431_All, Unigene13673_All, Unigene14111_All, Unigene15931_All, Unigene16508_All, Unigene17971_All, Unigene18234_All, Unigene18238_All, Unigene1980_All, Unigene3655_All, Unigene5684_All, Unigene7886_All                                                                                                                                                                                                                                                                                                                                                                                                                                                                                                                                                                                                                                                                                                                                                                                                                                                                                                                                                                                                                                                                                                                                                                                                                                                                                                                                                                                                                                                                                                                                                                                                                                                                                                                                                                                                                                                                                                                                                                                                                                                                                                                                                                                                                                                                                                                                                                                                                                                                                                                                                                                                                                                                                                                                                                                                                                                                                                                                                                                                                                                                                                                                                                                   |
| 106 | <a href="#">Pyrimidine metabolism</a>                       | CL1156.Contig3_All, CL1258.Contig1_All, CL1258.Contig2_All, CL1356.Contig1_All, CL1356.Contig2_All, CL1395.Contig2_All, CL1411.Contig1_All, CL1411.Contig8_All, CL1683.Contig2_All, CL1683.Contig7_All, CL1986.Contig1_All, CL2272.Contig1_All, CL2702.Contig1_All, CL2702.Contig2_All, CL3028.Contig1_All, CL322.Contig4_All, CL322.Contig5_All, CL322.Contig6_All, CL3251.Contig1_All, CL3251.Contig2_All, CL3420.Contig1_All, CL3576.Contig1_All, CL3635.Contig3_All, CL3657.Contig3_All, CL3664.Contig1_All, CL3664.Contig2_All, CL372.Contig1_All, CL3792.Contig3_All, CL3878.Contig2_All, CL4195.Contig2_All, CL4278.Contig2_All, CL4617.Contig2_All, CL4850.Contig1_All, CL4850.Contig3_All, CL5004.Contig1_All, CL5266.Contig1_All, CL5266.Contig2_All, CL5461.Contig2_All, CL598.Contig1_All, CL598.Contig2_All, CL63.Contig10_All, CL63.Contig9_All, CL893.Contig1_All, CL91.Contig1_All, Unigene10164_All, Unigene10230_All, Unigene10294_All, Unigene10549_All, Unigene10735_All, Unigene10742_All, Unigene11026_All, Unigene11027_All, Unigene1105_All, Unigene11623_All, Unigene11741_All, Unigene11970_All, Unigene12017_All, Unigene12027_All, Unigene1205_All, Unigene12060_All, Unigene12080_All, Unigene12096_All, Unigene12117_All, Unigene12396_All, Unigene12479_All, Unigene12488_All, Unigene12530_All, Unigene12645_All, Unigene1278_All, Unigene12887_All, Unigene12915_All, Unigene13002_All, Unigene13218_All, Unigene13256_All, Unigene13284_All, Unigene13623_All, Unigene14002_All, Unigene14516_All, Unigene1464_All, Unigene1505_All, Unigene1570_All, Unigene15790_All, Unigene15827_All, Unigene17292_All, Unigene17448_All, Unigene18127_All, Unigene18801_All, Unigene19657_All, Unigene20279_All, Unigene2037_All, Unigene2131_All, Unigene2156_All, Unigene2451_All, Unigene24_All, Unigene2513_All, Unigene2754_All, Unigene3081_All, Unigene3142_All, Unigene3288_All, Unigene3390_All, Unigene33_All, Unigene3419_All, Unigene3659_All, Unigene3831_All, Unigene3890_All, Unigene4102_All, Unigene4251_All, Unigene5160_All, Unigene5642_All, Unigene5745_All, Unigene6374_All, Unigene6749_All, Unigene7192_All, Unigene7296_All, Unigene7357_All, Unigene7750_All, Unigene7822_All, Unigene7993_All, Unigene8008_All, Unigene8228_All, Unigene8236_All, Unigene8370_All, Unigene9107_All, Unigene9758_All                                                                                                                                                                                                                                                                                                                                                                                                                                                                                                                                                                                                                                                                                                                                                                                                                                                                                                                                                                                                                                                                                                                                                                                                                                                                                                                                                                                                                                                                                                                                                                                                                                                                                                                    |
| 107 | <a href="#">Protein processing in endoplasmic reticulum</a> | CL1054.Contig1_All, CL1054.Contig2_All, CL1207.Contig2_All, CL1239.Contig2_All, CL1239.Contig4_All, CL1436.Contig1_All, CL1507.Contig1_All, CL1507.Contig2_All, CL1530.Contig1_All, CL1581.Contig1_All, CL1581.Contig2_All, CL1632.Contig1_All, CL1659.Contig1_All, CL1776.Contig1_All, CL1925.Contig1_All, CL2.Contig1_All, CL2032.Contig6_All, CL2165.Contig2_All, CL2237.Contig5_All, CL2403.Contig1_All, CL2426.Contig1_All, CL2426.Contig2_All, CL2503.Contig1_All, CL2608.Contig1_All, CL2686.Contig1_All, CL2686.Contig2_All, CL2826.Contig1_All, CL2924.Contig1_All, CL2924.Contig2_All, CL2924.Contig3_All, CL3027.Contig2_All, CL3055.Contig1_All, CL3071.Contig1_All, CL3071.Contig2_All, CL3092.Contig1_All, CL3092.Contig2_All, CL3290.Contig2_All, CL3290.Contig3_All, CL3332.Contig2_All, CL345.Contig1_All, CL3742.Contig1_All, CL3748.Contig1_All, CL383.Contig1_All, CL383.Contig2_All, CL4160.Contig1_All, CL4247.Contig2_All, CL4247.Contig3_All, CL4338.Contig1_All, CL4338.Contig2_All, CL4338.Contig3_All, CL4514.Contig2_All, CL4519.Contig1_All, CL4537.Contig1_All, CL4633.Contig1_All, CL4633.Contig2_All, CL4659.Contig1_All, CL4666.Contig1_All, CL4666.Contig2_All, CL4738.Contig1_All, CL4807.Contig1_All, CL4807.Contig2_All, CL4815.Contig1_All, CL4815.Contig2_All, CL4917.Contig2_All, CL4938.Contig1_All, CL5034.Contig1_All, CL5034.Contig2_All, CL5043.Contig1_All, CL5043.Contig2_All, CL5081.Contig2_All, CL5115.Contig1_All, CL5256.Contig1_All, CL5256.Contig2_All, CL5256.Contig4_All, CL5260.Contig1_All, CL558.Contig1_All, CL558.Contig2_All, CL558.Contig4_All, CL702.Contig2_All, CL702.Contig3_All, CL906.Contig3_All, CL906.Contig8_All, CL97.Contig1_All, Unigene10175_All, Unigene10245_All, Unigene10246_All, Unigene10374_All, Unigene10390_All, Unigene10420_All, Unigene10421_All, Unigene10433_All, Unigene10557_All, Unigene10585_All, Unigene10586_All, Unigene10702_All, Unigene10770_All, Unigene10837_All, Unigene10876_All, Unigene11000_All, Unigene11037_All, Unigene11040_All, Unigene11053_All, Unigene11112_All, Unigene11113_All, Unigene1119_All, Unigene11222_All, Unigene11258_All, Unigene11295_All, Unigene11342_All, Unigene11343_All, Unigene11411_All, Unigene11437_All, Unigene11438_All, Unigene11744_All, Unigene11777_All, Unigene11810_All, Unigene11828_All, Unigene11845_All, Unigene11884_All, Unigene11908_All, Unigene11911_All, Unigene12001_All, Unigene12006_All, Unigene12045_All, Unigene12072_All, Unigene12157_All, Unigene12259_All, Unigene12386_All, Unigene12461_All, Unigene12503_All, Unigene12542_All, Unigene12621_All, Unigene12713_All, Unigene12735_All, Unigene12740_All, Unigene12781_All, Unigene12786_All, Unigene12888_All, Unigene12890_All, Unigene12890_All, Unigene12903_All, Unigene12989_All, Unigene12996_All, Unigene13172_All, Unigene13228_All, Unigene13331_All, Unigene13644_All, Unigene14208_All, Unigene14416_All, Unigene15263_All, Unigene15265_All, Unigene15566_All, Unigene15587_All, Unigene155_All, Unigene15863_All, Unigene16093_All, Unigene16098_All, Unigene16499_All, Unigene1661_All, Unigene16855_All, Unigene170_All, Unigene17781_All, Unigene18245_All, Unigene18246_All, Unigene18360_All, Unigene18361_All, Unigene18535_All, Unigene19481_All, Unigene19483_All, Unigene20308_All, Unigene220_All, Unigene2261_All, Unigene2656_All, Unigene2662_All, Unigene2759_All, Unigene3099_All, Unigene3138_All, Unigene363_All, Unigene3811_All, Unigene3814_All, Unigene3976_All, Unigene4171_All, Unigene4359_All, Unigene45_All, Unigene4975_All, Unigene5105_All, Unigene5907_All, Unigene6648_All, Unigene6797_All, Unigene6801_All, Unigene6931_All, Unigene7120_All, Unigene7245_All, Unigene7466_All, Unigene7667_All, Unigene7671_All, Unigene7716_All, Unigene7723_All, Unigene7732_All, Unigene782_All, Unigene7905_All, Unigene8291_All, Unigene8627_All, Unigene8710_All, Unigene9012_All, Unigene9157_All, Unigene9705_All, Unigene9859_All, Unigene9940_All, Unigene9957_All, Unigene9971_All, Unigene9993_All |

|     |                                                        |                                                                                                                                                                                                                                                                                                                                                                                                                                                                                                                                                                                                                                                                                                                                                                                                                                                                                                                                                                                                                                                                                                                                                                                                                                                                                                                                                                                                                                                                                                                                                                                                                                                                                                                                                                                                                                                                                                                                                                                                                                                                                                                                                                                                                                                                                                                                                                                                                                                                                                                                                                                                                                                                                                                                                                                                                                                                                                                                                                                                                                                                                                                                                                                                                                                                                                                                                                                                                                                                                                                                                                                                                                                                                                      |
|-----|--------------------------------------------------------|------------------------------------------------------------------------------------------------------------------------------------------------------------------------------------------------------------------------------------------------------------------------------------------------------------------------------------------------------------------------------------------------------------------------------------------------------------------------------------------------------------------------------------------------------------------------------------------------------------------------------------------------------------------------------------------------------------------------------------------------------------------------------------------------------------------------------------------------------------------------------------------------------------------------------------------------------------------------------------------------------------------------------------------------------------------------------------------------------------------------------------------------------------------------------------------------------------------------------------------------------------------------------------------------------------------------------------------------------------------------------------------------------------------------------------------------------------------------------------------------------------------------------------------------------------------------------------------------------------------------------------------------------------------------------------------------------------------------------------------------------------------------------------------------------------------------------------------------------------------------------------------------------------------------------------------------------------------------------------------------------------------------------------------------------------------------------------------------------------------------------------------------------------------------------------------------------------------------------------------------------------------------------------------------------------------------------------------------------------------------------------------------------------------------------------------------------------------------------------------------------------------------------------------------------------------------------------------------------------------------------------------------------------------------------------------------------------------------------------------------------------------------------------------------------------------------------------------------------------------------------------------------------------------------------------------------------------------------------------------------------------------------------------------------------------------------------------------------------------------------------------------------------------------------------------------------------------------------------------------------------------------------------------------------------------------------------------------------------------------------------------------------------------------------------------------------------------------------------------------------------------------------------------------------------------------------------------------------------------------------------------------------------------------------------------------------------|
| 108 | <a href="#">Cytokine-cytokine receptor interaction</a> | CL1548.Contig2_All, CL1548.Contig3_All, CL2658.Contig1_All, CL2658.Contig2_All, CL2992.Contig1_All, CL4271.Contig1_All, CL4271.Contig2_All, CL4381.Contig1_All, CL4496.Contig3_All, CL5106.Contig1_All, Unigene11589_All, Unigene12435_All, Unigene12810_All, Unigene1679_All, Unigene1767_All, Unigene20226_All, Unigene2110_All, Unigene3967_All, Unigene6916_All, Unigene699_All, Unigene833_All                                                                                                                                                                                                                                                                                                                                                                                                                                                                                                                                                                                                                                                                                                                                                                                                                                                                                                                                                                                                                                                                                                                                                                                                                                                                                                                                                                                                                                                                                                                                                                                                                                                                                                                                                                                                                                                                                                                                                                                                                                                                                                                                                                                                                                                                                                                                                                                                                                                                                                                                                                                                                                                                                                                                                                                                                                                                                                                                                                                                                                                                                                                                                                                                                                                                                                  |
| 109 | <a href="#">Allograft rejection</a>                    | Unigene20260_All                                                                                                                                                                                                                                                                                                                                                                                                                                                                                                                                                                                                                                                                                                                                                                                                                                                                                                                                                                                                                                                                                                                                                                                                                                                                                                                                                                                                                                                                                                                                                                                                                                                                                                                                                                                                                                                                                                                                                                                                                                                                                                                                                                                                                                                                                                                                                                                                                                                                                                                                                                                                                                                                                                                                                                                                                                                                                                                                                                                                                                                                                                                                                                                                                                                                                                                                                                                                                                                                                                                                                                                                                                                                                     |
| 110 | <a href="#">Graft-versus-host disease</a>              | Unigene20260_All                                                                                                                                                                                                                                                                                                                                                                                                                                                                                                                                                                                                                                                                                                                                                                                                                                                                                                                                                                                                                                                                                                                                                                                                                                                                                                                                                                                                                                                                                                                                                                                                                                                                                                                                                                                                                                                                                                                                                                                                                                                                                                                                                                                                                                                                                                                                                                                                                                                                                                                                                                                                                                                                                                                                                                                                                                                                                                                                                                                                                                                                                                                                                                                                                                                                                                                                                                                                                                                                                                                                                                                                                                                                                     |
| 111 | <a href="#">Selenocompound metabolism</a>              | CL3127.Contig1_All, CL4424.Contig1_All, CL4424.Contig2_All, CL4424.Contig3_All, CL4424.Contig4_All, Unigene10190_All, Unigene10191_All, Unigene10425_All, Unigene20765_All, Unigene3188_All, Unigene3831_All                                                                                                                                                                                                                                                                                                                                                                                                                                                                                                                                                                                                                                                                                                                                                                                                                                                                                                                                                                                                                                                                                                                                                                                                                                                                                                                                                                                                                                                                                                                                                                                                                                                                                                                                                                                                                                                                                                                                                                                                                                                                                                                                                                                                                                                                                                                                                                                                                                                                                                                                                                                                                                                                                                                                                                                                                                                                                                                                                                                                                                                                                                                                                                                                                                                                                                                                                                                                                                                                                         |
| 112 | <a href="#">Notch signaling pathway</a>                | CL1193.Contig1_All, CL1193.Contig2_All, CL1193.Contig3_All, CL1339.Contig2_All, CL1448.Contig1_All, CL1534.Contig2_All, CL2170.Contig2_All, CL2170.Contig5_All, CL2245.Contig1_All, CL2245.Contig2_All, CL2245.Contig3_All, CL2563.Contig2_All, CL2824.Contig3_All, CL320.Contig1_All, CL320.Contig2_All, CL3350.Contig1_All, CL3350.Contig2_All, CL371.Contig1_All, CL4657.Contig2_All, CL4802.Contig1_All, CL4802.Contig2_All, CL4880.Contig1_All, CL4880.Contig2_All, CL5432.Contig1_All, CL823.Contig1_All, CL874.Contig10_All, CL874.Contig8_All, Unigene1040_All, Unigene1663_All, Unigene18054_All, Unigene3080_All, Unigene32_All, Unigene3314_All, Unigene3359_All, Unigene4075_All, Unigene4244_All, Unigene4432_All, Unigene4940_All, Unigene5064_All, Unigene5179_All, Unigene5341_All, Unigene54_All, Unigene5781_All, Unigene7093_All, Unigene8986_All, Unigene9065_All, Unigene9097_All, Unigene9641_All                                                                                                                                                                                                                                                                                                                                                                                                                                                                                                                                                                                                                                                                                                                                                                                                                                                                                                                                                                                                                                                                                                                                                                                                                                                                                                                                                                                                                                                                                                                                                                                                                                                                                                                                                                                                                                                                                                                                                                                                                                                                                                                                                                                                                                                                                                                                                                                                                                                                                                                                                                                                                                                                                                                                                                              |
| 113 | <a href="#">Insulin signaling pathway</a>              | CL1009.Contig1_All, CL1015.Contig11_All, CL1015.Contig27_All, CL1015.Contig9_All, CL102.Contig1_All, CL102.Contig2_All, CL1049.Contig4_All, CL1066.Contig1_All, CL1066.Contig2_All, CL1066.Contig3_All, CL1080.Contig2_All, CL1104.Contig3_All, CL1104.Contig4_All, CL1104.Contig5_All, CL1104.Contig6_All, CL1104.Contig7_All, CL1104.Contig8_All, CL1104.Contig9_All, CL1286.Contig2_All, CL1385.Contig1_All, CL1385.Contig2_All, CL1452.Contig1_All, CL1563.Contig2_All, CL1764.Contig2_All, CL1807.Contig1_All, CL1807.Contig2_All, CL1823.Contig8_All, CL1843.Contig3_All, CL1874.Contig2_All, CL1876.Contig1_All, CL1953.Contig1_All, CL2131.Contig4_All, CL2131.Contig5_All, CL2131.Contig6_All, CL2131.Contig8_All, CL2187.Contig2_All, CL2207.Contig2_All, CL241.Contig1_All, CL241.Contig7_All, CL2430.Contig3_All, CL244.Contig2_All, CL2468.Contig1_All, CL2468.Contig2_All, CL2505.Contig3_All, CL2505.Contig4_All, CL265.Contig2_All, CL265.Contig3_All, CL2770.Contig1_All, CL2770.Contig2_All, CL2839.Contig2_All, CL2839.Contig3_All, CL2839.Contig4_All, CL2839.Contig5_All, CL2839.Contig7_All, CL2843.Contig2_All, CL2941.Contig1_All, CL3093.Contig1_All, CL3112.Contig3_All, CL3657.Contig1_All, CL3657.Contig3_All, CL3667.Contig1_All, CL3667.Contig2_All, CL3667.Contig3_All, CL367.Contig1_All, CL367.Contig2_All, CL367.Contig3_All, CL3689.Contig2_All, CL3796.Contig2_All, CL3796.Contig3_All, CL3832.Contig1_All, CL400.Contig1_All, CL400.Contig2_All, CL4002.Contig1_All, CL4040.Contig1_All, CL408.Contig1_All, CL408.Contig3_All, CL408.Contig4_All, CL4158.Contig4_All, CL4158.Contig7_All, CL4175.Contig1_All, CL4175.Contig2_All, CL4175.Contig3_All, CL4224.Contig1_All, CL4224.Contig2_All, CL4224.Contig3_All, CL4395.Contig1_All, CL4439.Contig2_All, CL4509.Contig1_All, CL4509.Contig2_All, CL4529.Contig2_All, CL4559.Contig2_All, CL4559.Contig3_All, CL4687.Contig1_All, CL4687.Contig2_All, CL4787.Contig1_All, CL4813.Contig1_All, CL4813.Contig2_All, CL4813.Contig3_All, CL4883.Contig1_All, CL4883.Contig2_All, CL5115.Contig1_All, CL530.Contig1_All, CL5304.Contig1_All, CL5382.Contig1_All, CL578.Contig2_All, CL578.Contig3_All, CL695.Contig16_All, CL741.Contig2_All, CL772.Contig1_All, CL772.Contig2_All, CL903.Contig1_All, CL940.Contig3_All, CL940.Contig5_All, CL95.Contig1_All, CL95.Contig2_All, Unigene10006_All, Unigene10029_All, Unigene10174_All, Unigene10188_All, Unigene10574_All, Unigene10676_All, Unigene10677_All, Unigene10766_All, Unigene10875_All, Unigene11054_All, Unigene1168_All, Unigene11782_All, Unigene11811_All, Unigene11922_All, Unigene11940_All, Unigene12223_All, Unigene12295_All, Unigene12315_All, Unigene12671_All, Unigene12719_All, Unigene1279_All, Unigene12928_All, Unigene13036_All, Unigene13135_All, Unigene1512_All, Unigene16141_All, Unigene16769_All, Unigene16942_All, Unigene17683_All, Unigene17892_All, Unigene1819_All, Unigene18383_All, Unigene18748_All, Unigene1941_All, Unigene19424_All, Unigene20691_All, Unigene220_All, Unigene2233_All, Unigene236_All, Unigene247_All, Unigene2742_All, Unigene2749_All, Unigene2956_All, Unigene3282_All, Unigene3345_All, Unigene3779_All, Unigene3836_All, Unigene3996_All, Unigene4013_All, Unigene4022_All, Unigene4112_All, Unigene4935_All, Unigene4970_All, Unigene5675_All, Unigene5722_All, Unigene5811_All, Unigene6007_All, Unigene6101_All, Unigene6655_All, Unigene695_All, Unigene699_All, Unigene7016_All, Unigene7297_All, Unigene7704_All, Unigene7745_All, Unigene7759_All, Unigene8046_All, Unigene8747_All, Unigene8784_All, Unigene9730_All, Unigene9733_All, Unigene9765_All, Unigene9904_All, Unigene9987_All |

|     |                                              |                                                                                                                                                                                                                                                                                                                                                                                                                                                                                                                                                                                                                                                                                                                                                                                                                                                                                                                                                                                                                                                                                                                                                                                                                                                                                                                                                                                                                                                                                                                                                                                                                                                                                                                                                                                                                                                                                                                                                                                                                                                                                                                                                                                                                                                                                                                                                                                                                                                                                                                                                                                                                                                                                                                                                                                                                                                                                                                                                                                                                                                                                                                                                                                                                                                                                                                                                                                                                                                                                                                                                                                                                                                                                                 |
|-----|----------------------------------------------|-------------------------------------------------------------------------------------------------------------------------------------------------------------------------------------------------------------------------------------------------------------------------------------------------------------------------------------------------------------------------------------------------------------------------------------------------------------------------------------------------------------------------------------------------------------------------------------------------------------------------------------------------------------------------------------------------------------------------------------------------------------------------------------------------------------------------------------------------------------------------------------------------------------------------------------------------------------------------------------------------------------------------------------------------------------------------------------------------------------------------------------------------------------------------------------------------------------------------------------------------------------------------------------------------------------------------------------------------------------------------------------------------------------------------------------------------------------------------------------------------------------------------------------------------------------------------------------------------------------------------------------------------------------------------------------------------------------------------------------------------------------------------------------------------------------------------------------------------------------------------------------------------------------------------------------------------------------------------------------------------------------------------------------------------------------------------------------------------------------------------------------------------------------------------------------------------------------------------------------------------------------------------------------------------------------------------------------------------------------------------------------------------------------------------------------------------------------------------------------------------------------------------------------------------------------------------------------------------------------------------------------------------------------------------------------------------------------------------------------------------------------------------------------------------------------------------------------------------------------------------------------------------------------------------------------------------------------------------------------------------------------------------------------------------------------------------------------------------------------------------------------------------------------------------------------------------------------------------------------------------------------------------------------------------------------------------------------------------------------------------------------------------------------------------------------------------------------------------------------------------------------------------------------------------------------------------------------------------------------------------------------------------------------------------------------------------|
| 114 | <a href="#">Epstein-Barr virus infection</a> | CL1054.Contig1_All, CL1054.Contig2_All, CL1066.Contig1_All, CL1066.Contig2_All, CL1066.Contig3_All, CL1188.Contig1_All, CL1188.Contig2_All, CL1339.Contig2_All, CL1411.Contig1_All, CL1411.Contig8_All, CL1452.Contig1_All, CL1683.Contig2_All, CL1683.Contig7_All, CL1843.Contig3_All, CL1925.Contig1_All, CL1966.Contig2_All, CL2068.Contig5_All, CL2129.Contig4_All, CL2144.Contig1_All, CL2144.Contig2_All, CL2165.Contig2_All, CL2170.Contig2_All, CL2170.Contig5_All, CL2245.Contig1_All, CL2245.Contig2_All, CL2245.Contig3_All, CL2306.Contig2_All, CL2483.Contig2_All, CL249.Contig1_All, CL249.Contig3_All, CL249.Contig5_All, CL249.Contig6_All, CL2513.Contig1_All, CL2513.Contig2_All, CL2686.Contig1_All, CL2686.Contig2_All, CL3165.Contig1_All, CL3165.Contig2_All, CL3165.Contig3_All, CL3215.Contig1_All, CL3215.Contig2_All, CL3215.Contig3_All, CL322.Contig4_All, CL322.Contig5_All, CL322.Contig6_All, CL3251.Contig1_All, CL3251.Contig2_All, CL3290.Contig2_All, CL3290.Contig3_All, CL3332.Contig1_All, CL3420.Contig1_All, CL345.Contig1_All, CL3561.Contig1_All, CL3561.Contig2_All, CL3635.Contig3_All, CL3657.Contig3_All, CL3664.Contig1_All, CL3664.Contig2_All, CL367.Contig1_All, CL367.Contig2_All, CL367.Contig3_All, CL3792.Contig3_All, CL3979.Contig1_All, CL3979.Contig2_All, CL4003.Contig1_All, CL4003.Contig2_All, CL4103.Contig1_All, CL4555.Contig1_All, CL4597.Contig2_All, CL4736.Contig1_All, CL4736.Contig2_All, CL4815.Contig1_All, CL4815.Contig2_All, CL4874.Contig1_All, CL4966.Contig1_All, CL5004.Contig1_All, CL5115.Contig1_All, CL5242.Contig1_All, CL5256.Contig1_All, CL5256.Contig2_All, CL5256.Contig4_All, CL5461.Contig2_All, CL558.Contig1_All, CL558.Contig2_All, CL558.Contig4_All, CL598.Contig1_All, CL598.Contig2_All, CL619.Contig1_All, CL695.Contig16_All, CL940.Contig3_All, CL940.Contig5_All, Unigene10224_All, Unigene10225_All, Unigene10407_All, Unigene10408_All, Unigene10602_All, Unigene10619_All, Unigene10837_All, Unigene11222_All, Unigene11623_All, Unigene11810_All, Unigene11922_All, Unigene11936_All, Unigene12017_All, Unigene1205_All, Unigene12060_All, Unigene12080_All, Unigene12096_All, Unigene12117_All, Unigene12139_All, Unigene12161_All, Unigene12197_All, Unigene12259_All, Unigene12323_All, Unigene12479_All, Unigene1247_All, Unigene12488_All, Unigene12522_All, Unigene12591_All, Unigene1278_All, Unigene13002_All, Unigene13077_All, Unigene13108_All, Unigene13134_All, Unigene13158_All, Unigene13185_All, Unigene1326_All, Unigene13284_All, Unigene13421_All, Unigene14201_All, Unigene14208_All, Unigene1479_All, Unigene1538_All, Unigene15587_All, Unigene15827_All, Unigene15863_All, Unigene16093_All, Unigene1663_All, Unigene1757_All, Unigene18535_All, Unigene18801_All, Unigene19657_All, Unigene20260_All, Unigene2131_All, Unigene220_All, Unigene236_All, Unigene247_All, Unigene24_All, Unigene2513_All, Unigene2749_All, Unigene3081_All, Unigene3131_All, Unigene3288_All, Unigene3390_All, Unigene33_All, Unigene3419_All, Unigene3659_All, Unigene3779_All, Unigene4112_All, Unigene4251_All, Unigene4359_All, Unigene5179_All, Unigene5198_All, Unigene54_All, Unigene5745_All, Unigene5781_All, Unigene5896_All, Unigene6066_All, Unigene6526_All, Unigene6964_All, Unigene6977_All, Unigene7192_All, Unigene7296_All, Unigene7297_All, Unigene7466_All, Unigene7526_All, Unigene7702_All, Unigene7750_All, Unigene7817_All, Unigene7993_All, Unigene8008_All, Unigene8152_All, Unigene8217_All, Unigene8228_All, Unigene8236_All, Unigene8784_All, Unigene8924_All, Unigene9107_All, Unigene9194_All, Unigene9733_All, Unigene9758_All, Unigene9971_All |
| 115 | <a href="#">Serotonergic synapse</a>         | CL1452.Contig1_All, CL1675.Contig2_All, CL1711.Contig3_All, CL1887.Contig1_All, CL1887.Contig2_All, CL199.Contig1_All, CL2161.Contig2_All, CL2182.Contig1_All, CL2182.Contig3_All, CL2182.Contig4_All, CL225.Contig1_All, CL225.Contig3_All, CL2432.Contig2_All, CL2590.Contig1_All, CL2703.Contig2_All, CL2930.Contig5_All, CL3043.Contig2_All, CL3137.Contig2_All, CL3286.Contig1_All, CL3362.Contig1_All, CL3362.Contig2_All, CL3554.Contig1_All, CL363.Contig2_All, CL39.Contig1_All, CL39.Contig2_All, CL39.Contig3_All, CL39.Contig4_All, CL3948.Contig1_All, CL3948.Contig3_All, CL4439.Contig2_All, CL4473.Contig1_All, CL4473.Contig2_All, CL4473.Contig3_All, CL4559.Contig2_All, CL4559.Contig3_All, CL4594.Contig1_All, CL467.Contig1_All, CL4787.Contig1_All, CL4923.Contig2_All, CL4997.Contig1_All, CL4997.Contig2_All, CL5310.Contig2_All, CL5352.Contig1_All, CL5352.Contig2_All, CL5391.Contig1_All, CL5391.Contig2_All, CL5399.Contig1_All, CL5399.Contig2_All, CL5458.Contig5_All, CL551.Contig1_All, CL551.Contig2_All, CL691.Contig1_All, CL731.Contig1_All, CL860.Contig10_All, CL860.Contig8_All, CL860.Contig9_All, CL894.Contig1_All, CL940.Contig3_All, CL940.Contig5_All, CL973.Contig1_All, Unigene10058_All, Unigene10687_All, Unigene1134_All, Unigene12110_All, Unigene12671_All, Unigene12937_All, Unigene1671_All, Unigene1743_All, Unigene17640_All, Unigene1766_All, Unigene176_All, Unigene17929_All, Unigene17987_All, Unigene18495_All, Unigene18521_All, Unigene18653_All, Unigene18654_All, Unigene18898_All, Unigene18993_All, Unigene1925_All, Unigene2029_All, Unigene2032_All, Unigene2078_All, Unigene2193_All, Unigene2196_All, Unigene2209_All, Unigene2724_All, Unigene3029_All, Unigene3033_All, Unigene3034_All, Unigene3036_All, Unigene3037_All, Unigene3042_All, Unigene3779_All, Unigene4053_All, Unigene4070_All, Unigene4112_All, Unigene4126_All, Unigene4532_All, Unigene4780_All, Unigene4884_All, Unigene5146_All, Unigene5521_All, Unigene6217_All, Unigene6265_All, Unigene69_All, Unigene7135_All, Unigene7239_All, Unigene7265_All, Unigene7298_All, Unigene812_All, Unigene8142_All, Unigene8422_All, Unigene8621_All, Unigene8747_All, Unigene8993_All, Unigene9437_All, Unigene9572_All, Unigene9733_All, Unigene9867_All                                                                                                                                                                                                                                                                                                                                                                                                                                                                                                                                                                                                                                                                                                                                                                                                                                                                                                                                                                                                                                                                                                                                                                                                                                                                                                                                                                                                   |



|     |                                                                  |                                                                                                                                                                                                                                                                                                                                                                                                                                                                                                                                                                                                                                                                                                                                                                                                                                                                                                                                                                                                                                                                                                                                                                                                                                                                                                                                                                                                                                                                                                                                                                                                                                                                                                                                                                                                                                                                                                                                                                                                                                                                                                                                                                                                                                                                                                                                                                                                                                                                                                                                                                                                                                                                                                                                                                                                                                      |
|-----|------------------------------------------------------------------|--------------------------------------------------------------------------------------------------------------------------------------------------------------------------------------------------------------------------------------------------------------------------------------------------------------------------------------------------------------------------------------------------------------------------------------------------------------------------------------------------------------------------------------------------------------------------------------------------------------------------------------------------------------------------------------------------------------------------------------------------------------------------------------------------------------------------------------------------------------------------------------------------------------------------------------------------------------------------------------------------------------------------------------------------------------------------------------------------------------------------------------------------------------------------------------------------------------------------------------------------------------------------------------------------------------------------------------------------------------------------------------------------------------------------------------------------------------------------------------------------------------------------------------------------------------------------------------------------------------------------------------------------------------------------------------------------------------------------------------------------------------------------------------------------------------------------------------------------------------------------------------------------------------------------------------------------------------------------------------------------------------------------------------------------------------------------------------------------------------------------------------------------------------------------------------------------------------------------------------------------------------------------------------------------------------------------------------------------------------------------------------------------------------------------------------------------------------------------------------------------------------------------------------------------------------------------------------------------------------------------------------------------------------------------------------------------------------------------------------------------------------------------------------------------------------------------------------|
| 116 | <a href="#">Adherens junction</a>                                | CL102.Contig1_All, CL102.Contig2_All, CL1080.Contig2_All, CL1192.Contig1_All, CL1192.Contig2_All, CL1192.Contig3_All, CL1334.Contig2_All, CL1334.Contig3_All, CL1335.Contig1_All, CL1355.Contig1_All, CL140.Contig1_All, CL1439.Contig1_All, CL1439.Contig2_All, CL1503.Contig3_All, CL1503.Contig4_All, CL1503.Contig5_All, CL1535.Contig3_All, CL1548.Contig2_All, CL1548.Contig3_All, CL156.Contig1_All, CL156.Contig3_All, CL156.Contig4_All, CL160.Contig1_All, CL160.Contig2_All, CL160.Contig3_All, CL160.Contig4_All, CL160.Contig5_All, CL160.Contig6_All, CL160.Contig7_All, CL1723.Contig1_All, CL1723.Contig2_All, CL1723.Contig7_All, CL1803.Contig1_All, CL2034.Contig1_All, CL2034.Contig2_All, CL2170.Contig2_All, CL2170.Contig5_All, CL2339.Contig2_All, CL2368.Contig1_All, CL2375.Contig2_All, CL241.Contig1_All, CL241.Contig7_All, CL2505.Contig3_All, CL2505.Contig4_All, CL2541.Contig1_All, CL257.Contig1_All, CL257.Contig2_All, CL2658.Contig1_All, CL2658.Contig2_All, CL271.Contig2_All, CL2791.Contig2_All, CL2975.Contig2_All, CL3027.Contig3_All, CL3066.Contig2_All, CL3114.Contig2_All, CL3348.Contig1_All, CL3436.Contig1_All, CL3436.Contig4_All, CL3436.Contig9_All, CL3460.Contig2_All, CL3460.Contig3_All, CL3504.Contig1_All, CL4088.Contig2_All, CL4130.Contig1_All, CL4271.Contig1_All, CL4381.Contig1_All, CL4712.Contig2_All, CL4813.Contig1_All, CL4813.Contig2_All, CL4813.Contig3_All, CL5192.Contig1_All, CL523.Contig1_All, CL523.Contig2_All, CL5468.Contig3_All, CL622.Contig1_All, CL622.Contig2_All, CL622.Contig4_All, CL724.Contig1_All, CL95.Contig1_All, CL95.Contig2_All, Unigene10097_All, Unigene10619_All, Unigene10998_All, Unigene11082_All, Unigene11307_All, Unigene11459_All, Unigene11521_All, Unigene11597_All, Unigene11598_All, Unigene11599_All, Unigene12201_All, Unigene12340_All, Unigene12591_All, Unigene12603_All, Unigene12684_All, Unigene13092_All, Unigene13134_All, Unigene1447_All, Unigene1679_All, Unigene16840_All, Unigene16963_All, Unigene1819_All, Unigene18258_All, Unigene18423_All, Unigene18598_All, Unigene18873_All, Unigene1920_All, Unigene19424_All, Unigene2050_All, Unigene215_All, Unigene2741_All, Unigene278_All, Unigene3131_All, Unigene3135_All, Unigene4133_All, Unigene4801_All, Unigene4810_All, Unigene4998_All, Unigene5250_All, Unigene5303_All, Unigene54_All, Unigene5631_All, Unigene5727_All, Unigene5781_All, Unigene5808_All, Unigene5873_All, Unigene6014_All, Unigene6029_All, Unigene6290_All, Unigene699_All, Unigene7158_All, Unigene731_All, Unigene777_All, Unigene783_All, Unigene8184_All, Unigene8247_All, Unigene8673_All, Unigene8677_All, Unigene8972_All, Unigene9042_All, Unigene9050_All, Unigene949_All, Unigene9740_All, Unigene9785_All, Unigene9787_All, Unigene9877_All, Unigene9902_All |
| 117 | <a href="#">Glycosaminoglycan biosynthesis - heparan sulfate</a> | CL1460.Contig2_All, CL1737.Contig1_All, CL1737.Contig2_All, CL1838.Contig1_All, CL2624.Contig4_All, CL3474.Contig1_All, CL3474.Contig2_All, CL424.Contig1_All, CL424.Contig2_All, CL5118.Contig2_All, Unigene12126_All, Unigene2178_All, Unigene4962_All, Unigene5903_All, Unigene6079_All, Unigene6182_All, Unigene6931_All, Unigene7375_All, Unigene8748_All                                                                                                                                                                                                                                                                                                                                                                                                                                                                                                                                                                                                                                                                                                                                                                                                                                                                                                                                                                                                                                                                                                                                                                                                                                                                                                                                                                                                                                                                                                                                                                                                                                                                                                                                                                                                                                                                                                                                                                                                                                                                                                                                                                                                                                                                                                                                                                                                                                                                       |
| 118 | <a href="#">Prostate cancer</a>                                  | CL1066.Contig1_All, CL1066.Contig2_All, CL1066.Contig3_All, CL1104.Contig3_All, CL1104.Contig4_All, CL1104.Contig5_All, CL1104.Contig6_All, CL1104.Contig7_All, CL1104.Contig8_All, CL1104.Contig9_All, CL1548.Contig2_All, CL1548.Contig3_All, CL1584.Contig2_All, CL1807.Contig1_All, CL1807.Contig2_All, CL1843.Contig3_All, CL2170.Contig2_All, CL2170.Contig5_All, CL241.Contig1_All, CL241.Contig7_All, CL2411.Contig1_All, CL2456.Contig3_All, CL2505.Contig3_All, CL2505.Contig4_All, CL2552.Contig3_All, CL2711.Contig1_All, CL2711.Contig2_All, CL3078.Contig1_All, CL3373.Contig1_All, CL3373.Contig2_All, CL3618.Contig1_All, CL367.Contig1_All, CL367.Contig2_All, CL367.Contig3_All, CL3788.Contig1_All, CL3796.Contig2_All, CL3796.Contig3_All, CL3920.Contig2_All, CL4158.Contig4_All, CL4158.Contig7_All, CL4439.Contig2_All, CL4453.Contig1_All, CL450.Contig10_All, CL4787.Contig1_All, CL4969.Contig1_All, CL695.Contig16_All, CL702.Contig2_All, CL702.Contig3_All, CL95.Contig1_All, Unigene10174_All, Unigene10381_All, Unigene11000_All, Unigene11053_All, Unigene11916_All, Unigene11922_All, Unigene11949_All, Unigene12008_All, Unigene12671_All, Unigene1385_All, Unigene15263_All, Unigene15265_All, Unigene15435_All, Unigene15451_All, Unigene16499_All, Unigene1757_All, Unigene17781_All, Unigene19310_All, Unigene236_All, Unigene247_All, Unigene2742_All, Unigene2749_All, Unigene2760_All, Unigene2914_All, Unigene3689_All, Unigene54_All, Unigene5727_All, Unigene5781_All, Unigene5870_All, Unigene5896_All, Unigene6041_All, Unigene6797_All, Unigene699_All, Unigene7297_All, Unigene7299_All, Unigene7548_All, Unigene777_All, Unigene783_All, Unigene8046_All, Unigene8747_All, Unigene8784_All, Unigene8997_All, Unigene908_All, Unigene9298_All                                                                                                                                                                                                                                                                                                                                                                                                                                                                                                                                                                                                                                                                                                                                                                                                                                                                                                                                                                                                                                        |
| 119 | <a href="#">Porphyrin and chlorophyll metabolism</a>             | CL1176.Contig4_All, CL2308.Contig1_All, CL2370.Contig2_All, CL2370.Contig3_All, CL2370.Contig4_All, CL2898.Contig1_All, CL2898.Contig2_All, CL2898.Contig3_All, CL3654.Contig1_All, CL3654.Contig2_All, CL4110.Contig1_All, CL4110.Contig2_All, CL4482.Contig2_All, CL490.Contig1_All, CL490.Contig2_All, CL490.Contig3_All, CL720.Contig1_All, CL720.Contig4_All, CL744.Contig1_All, CL744.Contig2_All, Unigene10617_All, Unigene1120_All, Unigene11804_All, Unigene11824_All, Unigene11996_All, Unigene12297_All, Unigene12756_All, Unigene147_All, Unigene15946_All, Unigene16575_All, Unigene18028_All, Unigene18489_All, Unigene19085_All, Unigene19677_All, Unigene2107_All, Unigene2312_All, Unigene2660_All, Unigene3012_All, Unigene3125_All, Unigene3132_All, Unigene3180_All, Unigene3701_All, Unigene3771_All, Unigene4342_All, Unigene4564_All, Unigene4675_All, Unigene526_All, Unigene5429_All, Unigene5637_All, Unigene5751_All, Unigene6129_All, Unigene6650_All, Unigene6673_All, Unigene671_All, Unigene8049_All, Unigene8218_All, Unigene9227_All                                                                                                                                                                                                                                                                                                                                                                                                                                                                                                                                                                                                                                                                                                                                                                                                                                                                                                                                                                                                                                                                                                                                                                                                                                                                                                                                                                                                                                                                                                                                                                                                                                                                                                                                                                |
| 120 | <a href="#">mTOR signaling pathway</a>                           | CL1066.Contig1_All, CL1066.Contig2_All, CL1066.Contig3_All, CL2083.Contig1_All, CL2187.Contig2_All, CL2207.Contig2_All, CL3093.Contig1_All, CL3112.Contig3_All, CL3263.Contig1_All, CL367.Contig1_All, CL367.Contig2_All, CL367.Contig3_All, CL3796.Contig2_All, CL3796.Contig3_All, CL4529.Contig2_All, CL5158.Contig1_All, CL5158.Contig2_All, CL524.Contig10_All, CL524.Contig11_All, CL524.Contig12_All, CL524.Contig13_All, CL524.Contig14_All, CL524.Contig15_All, CL524.Contig16_All, CL524.Contig17_All, CL524.Contig18_All, CL524.Contig1_All, CL524.Contig3_All, CL524.Contig4_All, CL524.Contig5_All, CL524.Contig6_All, CL524.Contig9_All, CL557.Contig1_All, CL695.Contig16_All, Unigene10497_All, Unigene10676_All, Unigene10677_All, Unigene10875_All, Unigene1155_All, Unigene11811_All, Unigene13135_All, Unigene14175_All, Unigene18383_All, Unigene2742_All, Unigene2749_All, Unigene2956_All, Unigene6007_All, Unigene7745_All, Unigene8747_All                                                                                                                                                                                                                                                                                                                                                                                                                                                                                                                                                                                                                                                                                                                                                                                                                                                                                                                                                                                                                                                                                                                                                                                                                                                                                                                                                                                                                                                                                                                                                                                                                                                                                                                                                                                                                                                                  |



|     |                                                    |                                                                                                                                                                                                                                                                                                                                                                                                                                                                                                                                                                                                                                                                                                                                                                                                                                                                                                                                                                                                                                                                                                                                                                                                                                                                                                                                                                                                                                                                                                                                                                                                                                                                                                                                                                                                                                                                                                                                                                                                                                                                                                                                                                                                        |
|-----|----------------------------------------------------|--------------------------------------------------------------------------------------------------------------------------------------------------------------------------------------------------------------------------------------------------------------------------------------------------------------------------------------------------------------------------------------------------------------------------------------------------------------------------------------------------------------------------------------------------------------------------------------------------------------------------------------------------------------------------------------------------------------------------------------------------------------------------------------------------------------------------------------------------------------------------------------------------------------------------------------------------------------------------------------------------------------------------------------------------------------------------------------------------------------------------------------------------------------------------------------------------------------------------------------------------------------------------------------------------------------------------------------------------------------------------------------------------------------------------------------------------------------------------------------------------------------------------------------------------------------------------------------------------------------------------------------------------------------------------------------------------------------------------------------------------------------------------------------------------------------------------------------------------------------------------------------------------------------------------------------------------------------------------------------------------------------------------------------------------------------------------------------------------------------------------------------------------------------------------------------------------------|
| 121 | <a href="#">Non-small cell lung cancer</a>         | CL1066.Contig1_All, CL1066.Contig2_All, CL1066.Contig3_All, CL1091.Contig14_All, CL1104.Contig1_All, CL1104.Contig2_All, CL1104.Contig3_All, CL1104.Contig4_All, CL1104.Contig5_All, CL1104.Contig6_All, CL1104.Contig7_All, CL1104.Contig8_All, CL1104.Contig9_All, CL1548.Contig2_All, CL1548.Contig3_All, CL1741.Contig1_All, CL1807.Contig1_All, CL1807.Contig2_All, CL1960.Contig1_All, CL1960.Contig2_All, CL2182.Contig1_All, CL2182.Contig3_All, CL2182.Contig4_All, CL3373.Contig1_All, CL3373.Contig2_All, CL367.Contig1_All, CL367.Contig2_All, CL367.Contig3_All, CL39.Contig1_All, CL39.Contig2_All, CL39.Contig3_All, CL39.Contig4_All, CL3979.Contig1_All, CL3979.Contig2_All, CL4158.Contig4_All, CL4158.Contig5_All, CL4158.Contig7_All, CL4439.Contig2_All, CL4787.Contig1_All, CL5204.Contig1_All, CL5204.Contig2_All, CL5391.Contig1_All, CL5391.Contig2_All, CL695.Contig16_All, CL880.Contig3_All, CL940.Contig3_All, CL940.Contig5_All, Unigene10174_All, Unigene12099_All, Unigene12623_All, Unigene12671_All, Unigene18898_All, Unigene2374_All, Unigene2742_All, Unigene2749_All, Unigene699_All, Unigene740_All, Unigene8046_All, Unigene8747_All                                                                                                                                                                                                                                                                                                                                                                                                                                                                                                                                                                                                                                                                                                                                                                                                                                                                                                                                                                                                                           |
| 122 | <a href="#">Polyketide sugar unit biosynthesis</a> | CL1371.Contig2_All, Unigene13457_All, Unigene5837_All                                                                                                                                                                                                                                                                                                                                                                                                                                                                                                                                                                                                                                                                                                                                                                                                                                                                                                                                                                                                                                                                                                                                                                                                                                                                                                                                                                                                                                                                                                                                                                                                                                                                                                                                                                                                                                                                                                                                                                                                                                                                                                                                                  |
| 123 | <a href="#">Amphetamine addiction</a>              | CL1066.Contig1_All, CL1066.Contig2_All, CL1286.Contig2_All, CL1452.Contig1_All, CL1563.Contig2_All, CL1823.Contig8_All, CL2131.Contig4_All, CL2131.Contig5_All, CL2131.Contig6_All, CL2131.Contig8_All, CL2182.Contig1_All, CL2182.Contig3_All, CL2182.Contig4_All, CL244.Contig2_All, CL2468.Contig1_All, CL2468.Contig2_All, CL3286.Contig1_All, CL3667.Contig1_All, CL3667.Contig2_All, CL3667.Contig3_All, CL3689.Contig2_All, CL39.Contig1_All, CL39.Contig2_All, CL39.Contig3_All, CL39.Contig4_All, CL3920.Contig2_All, CL4002.Contig1_All, CL42.Contig2_All, CL4395.Contig1_All, CL44.Contig10_All, CL44.Contig12_All, CL44.Contig13_All, CL44.Contig16_All, CL44.Contig17_All, CL44.Contig18_All, CL44.Contig19_All, CL44.Contig1_All, CL44.Contig22_All, CL44.Contig23_All, CL44.Contig2_All, CL44.Contig3_All, CL44.Contig4_All, CL44.Contig5_All, CL44.Contig6_All, CL44.Contig8_All, CL44.Contig9_All, CL4509.Contig1_All, CL4509.Contig2_All, CL4521.Contig1_All, CL4521.Contig2_All, CL4521.Contig3_All, CL4521.Contig5_All, CL4594.Contig1_All, CL4736.Contig1_All, CL4736.Contig2_All, CL5064.Contig2_All, CL5391.Contig1_All, CL5391.Contig2_All, CL741.Contig2_All, CL772.Contig1_All, CL772.Contig2_All, CL870.Contig4_All, CL870.Contig8_All, CL870.Contig9_All, CL940.Contig3_All, CL940.Contig5_All, Unigene10006_All, Unigene10058_All, Unigene10078_All, Unigene10574_All, Unigene11054_All, Unigene1168_All, Unigene12315_All, Unigene12719_All, Unigene13853_All, Unigene1417_All, Unigene1479_All, Unigene1512_All, Unigene1663_All, Unigene16769_All, Unigene18898_All, Unigene19148_All, Unigene1941_All, Unigene2029_All, Unigene2193_All, Unigene2233_All, Unigene2760_All, Unigene3779_All, Unigene3812_All, Unigene3996_All, Unigene4013_All, Unigene4022_All, Unigene4112_All, Unigene4116_All, Unigene4532_All, Unigene4935_All, Unigene4970_All, Unigene5179_All, Unigene5675_All, Unigene5869_All, Unigene6005_All, Unigene661_All, Unigene6655_All, Unigene7298_All, Unigene7702_All, Unigene7704_All, Unigene7759_All, Unigene8621_All, Unigene9733_All, Unigene9904_All                                                                                       |
| 124 | <a href="#">Glycolysis / Gluconeogenesis</a>       | CL1879.Contig2_All, CL1879.Contig3_All, CL1879.Contig4_All, CL2017.Contig4_All, CL2017.Contig5_All, CL2294.Contig4_All, CL2309.Contig2_All, CL2309.Contig3_All, CL2430.Contig3_All, CL2595.Contig1_All, CL2694.Contig1_All, CL2694.Contig3_All, CL4130.Contig1_All, CL4130.Contig2_All, CL4144.Contig3_All, CL4144.Contig4_All, CL4358.Contig1_All, CL4451.Contig1_All, CL4451.Contig2_All, CL4753.Contig1_All, CL898.Contig1_All, CL898.Contig2_All, Unigene10029_All, Unigene10098_All, Unigene10111_All, Unigene10282_All, Unigene10299_All, Unigene10526_All, Unigene10686_All, Unigene10908_All, Unigene11061_All, Unigene11062_All, Unigene11186_All, Unigene11187_All, Unigene11188_All, Unigene11380_All, Unigene11560_All, Unigene11561_All, Unigene11782_All, Unigene11788_All, Unigene11826_All, Unigene11830_All, Unigene11894_All, Unigene11930_All, Unigene1197_All, Unigene12066_All, Unigene12140_All, Unigene12300_All, Unigene12399_All, Unigene12459_All, Unigene12491_All, Unigene12509_All, Unigene12589_All, Unigene12643_All, Unigene12732_All, Unigene12801_All, Unigene13375_All, Unigene13410_All, Unigene13594_All, Unigene13727_All, Unigene13773_All, Unigene15270_All, Unigene1538_All, Unigene15851_All, Unigene16206_All, Unigene16290_All, Unigene16549_All, Unigene16591_All, Unigene16824_All, Unigene17053_All, Unigene17282_All, Unigene17410_All, Unigene17527_All, Unigene17838_All, Unigene17873_All, Unigene17939_All, Unigene18003_All, Unigene18004_All, Unigene18088_All, Unigene18101_All, Unigene18194_All, Unigene18248_All, Unigene18312_All, Unigene18656_All, Unigene18663_All, Unigene18666_All, Unigene186_All, Unigene18842_All, Unigene19024_All, Unigene19038_All, Unigene19153_All, Unigene19184_All, Unigene19340_All, Unigene19366_All, Unigene20152_All, Unigene20815_All, Unigene2322_All, Unigene236_All, Unigene2496_All, Unigene2928_All, Unigene3105_All, Unigene3450_All, Unigene4267_All, Unigene4626_All, Unigene5053_All, Unigene5180_All, Unigene5338_All, Unigene627_All, Unigene6360_All, Unigene6526_All, Unigene6618_All, Unigene6954_All, Unigene7735_All, Unigene8037_All, Unigene8347_All, Unigene8563_All, Unigene923_All |
| 125 | <a href="#">Ascorbate and aldarate metabolism</a>  | CL1176.Contig4_All, CL2145.Contig2_All, CL2308.Contig1_All, CL2309.Contig2_All, CL2309.Contig3_All, CL2370.Contig2_All, CL2370.Contig3_All, CL2370.Contig4_All, CL2694.Contig1_All, CL2694.Contig3_All, CL3654.Contig1_All, CL3654.Contig2_All, CL4110.Contig1_All, CL4110.Contig2_All, CL4144.Contig3_All, CL4144.Contig4_All, CL4451.Contig1_All, CL4451.Contig2_All, CL4753.Contig1_All, CL490.Contig1_All, CL490.Contig2_All, CL490.Contig3_All, CL720.Contig1_All, CL720.Contig4_All, CL744.Contig1_All, CL744.Contig2_All, Unigene10282_All, Unigene10299_All, Unigene10526_All, Unigene10686_All, Unigene10908_All, Unigene1120_All, Unigene1197_All, Unigene12297_All, Unigene12955_All, Unigene13410_All, Unigene13773_All, Unigene147_All, Unigene15270_All, Unigene15946_All, Unigene16206_All, Unigene17527_All, Unigene18028_All, Unigene18101_All, Unigene18489_All, Unigene186_All, Unigene19038_All, Unigene2107_All, Unigene2312_All, Unigene2660_All, Unigene3012_All, Unigene3125_All, Unigene3132_All, Unigene3450_All, Unigene3701_All, Unigene3771_All, Unigene4342_All, Unigene4564_All, Unigene4675_All, Unigene5053_All, Unigene526_All, Unigene5637_All, Unigene5751_All, Unigene6129_All, Unigene6360_All, Unigene6650_All, Unigene6673_All, Unigene8049_All, Unigene8218_All, Unigene9227_All                                                                                                                                                                                                                                                                                                                                                                                                                                                                                                                                                                                                                                                                                                                                                                                                                                                                              |
| 126 | <a href="#">Vitamin B6 metabolism</a>              | CL3364.Contig2_All, Unigene10403_All, Unigene10404_All, Unigene12739_All, Unigene13154_All                                                                                                                                                                                                                                                                                                                                                                                                                                                                                                                                                                                                                                                                                                                                                                                                                                                                                                                                                                                                                                                                                                                                                                                                                                                                                                                                                                                                                                                                                                                                                                                                                                                                                                                                                                                                                                                                                                                                                                                                                                                                                                             |

|     |                                                                 |                                                                                                                                                                                                                                                                                                                                                                                                                                                                                                                                                                                                                                                                                                                                                                                                                                                                                                                                                                                                                                                                                                                                                                                                                                                                                                                                                                                                                                                                                                                                                                                                                                                                                                                                                                                                                                                                                                                                                                                                                                                                                                                                                                                                         |
|-----|-----------------------------------------------------------------|---------------------------------------------------------------------------------------------------------------------------------------------------------------------------------------------------------------------------------------------------------------------------------------------------------------------------------------------------------------------------------------------------------------------------------------------------------------------------------------------------------------------------------------------------------------------------------------------------------------------------------------------------------------------------------------------------------------------------------------------------------------------------------------------------------------------------------------------------------------------------------------------------------------------------------------------------------------------------------------------------------------------------------------------------------------------------------------------------------------------------------------------------------------------------------------------------------------------------------------------------------------------------------------------------------------------------------------------------------------------------------------------------------------------------------------------------------------------------------------------------------------------------------------------------------------------------------------------------------------------------------------------------------------------------------------------------------------------------------------------------------------------------------------------------------------------------------------------------------------------------------------------------------------------------------------------------------------------------------------------------------------------------------------------------------------------------------------------------------------------------------------------------------------------------------------------------------|
| 127 | <a href="#">Pertussis</a>                                       | CL1085.Contig3_All, CL1286.Contig2_All, CL1823.Contig8_All, CL2131.Contig4_All, CL2131.Contig5_All, CL2131.Contig6_All, CL2131.Contig8_All, CL2468.Contig1_All, CL2468.Contig2_All, CL326.Contig1_All, CL3667.Contig1_All, CL3667.Contig2_All, CL3667.Contig3_All, CL4395.Contig1_All, CL4509.Contig1_All, CL4509.Contig2_All, CL4736.Contig1_All, CL4736.Contig2_All, CL4966.Contig1_All, CL5115.Contig1_All, CL772.Contig1_All, CL772.Contig2_All, Unigene10006_All, Unigene10574_All, Unigene10775_All, Unigene11052_All, Unigene11054_All, Unigene11307_All, Unigene12315_All, Unigene12719_All, Unigene1479_All, Unigene16769_All, Unigene1757_All, Unigene20095_All, Unigene220_All, Unigene3945_All, Unigene3996_All, Unigene4013_All, Unigene4207_All, Unigene5521_All, Unigene5675_All, Unigene5808_All, Unigene6217_All, Unigene8246_All, Unigene9050_All, Unigene9877_All                                                                                                                                                                                                                                                                                                                                                                                                                                                                                                                                                                                                                                                                                                                                                                                                                                                                                                                                                                                                                                                                                                                                                                                                                                                                                                                    |
| 128 | <a href="#">Glycosphingolipid biosynthesis - ganglio series</a> | CL3965.Contig1_All, CL3965.Contig2_All, CL3965.Contig4_All, CL5403.Contig2_All, Unigene17953_All, Unigene5646_All, Unigene9260_All, Unigene9314_All                                                                                                                                                                                                                                                                                                                                                                                                                                                                                                                                                                                                                                                                                                                                                                                                                                                                                                                                                                                                                                                                                                                                                                                                                                                                                                                                                                                                                                                                                                                                                                                                                                                                                                                                                                                                                                                                                                                                                                                                                                                     |
| 129 | <a href="#">Drug metabolism - other enzymes</a>                 | CL1156.Contig3_All, CL1176.Contig4_All, CL1305.Contig1_All, CL1531.Contig1_All, CL1531.Contig2_All, CL1531.Contig3_All, CL1711.Contig1_All, CL1711.Contig2_All, CL2220.Contig1_All, CL2220.Contig2_All, CL2272.Contig1_All, CL2308.Contig1_All, CL2370.Contig2_All, CL2370.Contig3_All, CL2370.Contig4_All, CL2532.Contig1_All, CL2533.Contig3_All, CL258.Contig1_All, CL258.Contig2_All, CL2707.Contig1_All, CL3511.Contig2_All, CL3614.Contig1_All, CL3614.Contig2_All, CL3654.Contig1_All, CL3654.Contig2_All, CL3878.Contig2_All, CL3994.Contig1_All, CL4030.Contig3_All, CL4030.Contig4_All, CL4110.Contig1_All, CL4110.Contig2_All, CL4195.Contig2_All, CL4527.Contig1_All, CL4527.Contig2_All, CL485.Contig1_All, CL485.Contig2_All, CL4850.Contig1_All, CL4850.Contig3_All, CL490.Contig1_All, CL490.Contig2_All, CL490.Contig3_All, CL5266.Contig1_All, CL5266.Contig2_All, CL720.Contig1_All, CL720.Contig4_All, CL731.Contig1_All, CL744.Contig1_All, CL744.Contig2_All, CL900.Contig3_All, Unigene10164_All, Unigene10742_All, Unigene11026_All, Unigene11027_All, Unigene1120_All, Unigene11671_All, Unigene12297_All, Unigene12396_All, Unigene1254_All, Unigene14002_All, Unigene147_All, Unigene15946_All, Unigene16322_All, Unigene18028_All, Unigene18489_All, Unigene18597_All, Unigene19987_All, Unigene2107_All, Unigene2150_All, Unigene2260_All, Unigene2312_All, Unigene2660_All, Unigene2675_All, Unigene2686_All, Unigene3012_All, Unigene3125_All, Unigene3132_All, Unigene3701_All, Unigene3706_All, Unigene3707_All, Unigene3771_All, Unigene4096_All, Unigene432_All, Unigene4342_All, Unigene4564_All, Unigene4675_All, Unigene5060_All, Unigene5216_All, Unigene526_All, Unigene5429_All, Unigene5600_All, Unigene5637_All, Unigene5751_All, Unigene6080_All, Unigene6129_All, Unigene6650_All, Unigene6673_All, Unigene7023_All, Unigene7663_All, Unigene8049_All, Unigene8218_All, Unigene8370_All, Unigene8643_All, Unigene9227_All, Unigene9644_All                                                                                                                                                                                                                 |
| 130 | <a href="#">Nicotinate and nicotinamide metabolism</a>          | CL1258.Contig1_All, CL1258.Contig2_All, CL1388.Contig1_All, CL3028.Contig1_All, CL3040.Contig1_All, CL3228.Contig1_All, CL3576.Contig1_All, CL4346.Contig1_All, CL52.Contig11_All, CL52.Contig15_All, CL52.Contig24_All, CL52.Contig2_All, CL52.Contig5_All, Unigene12645_All, Unigene12887_All, Unigene20289_All, Unigene3890_All, Unigene7822_All, Unigene8726_All, Unigene8970_All, Unigene8971_All                                                                                                                                                                                                                                                                                                                                                                                                                                                                                                                                                                                                                                                                                                                                                                                                                                                                                                                                                                                                                                                                                                                                                                                                                                                                                                                                                                                                                                                                                                                                                                                                                                                                                                                                                                                                  |
| 131 | <a href="#">D-Arginine and D-ornithine metabolism</a>           | CL3315.Contig3_All, CL3315.Contig4_All, CL348.Contig1_All, CL348.Contig2_All, CL580.Contig2_All, CL584.Contig10_All, CL584.Contig15_All, CL584.Contig17_All, CL584.Contig1_All, CL584.Contig3_All, CL584.Contig4_All, CL584.Contig6_All, CL584.Contig7_All, Unigene3482_All                                                                                                                                                                                                                                                                                                                                                                                                                                                                                                                                                                                                                                                                                                                                                                                                                                                                                                                                                                                                                                                                                                                                                                                                                                                                                                                                                                                                                                                                                                                                                                                                                                                                                                                                                                                                                                                                                                                             |
| 132 | <a href="#">Long-term potentiation</a>                          | CL1286.Contig2_All, CL1452.Contig1_All, CL147.Contig6_All, CL1563.Contig2_All, CL1823.Contig8_All, CL2131.Contig4_All, CL2131.Contig5_All, CL2131.Contig6_All, CL2131.Contig8_All, CL2170.Contig2_All, CL2170.Contig5_All, CL2182.Contig1_All, CL2182.Contig3_All, CL2182.Contig4_All, CL244.Contig2_All, CL2468.Contig1_All, CL2468.Contig2_All, CL2930.Contig5_All, CL296.Contig16_All, CL3263.Contig1_All, CL3667.Contig1_All, CL3667.Contig2_All, CL3667.Contig3_All, CL3689.Contig2_All, CL39.Contig1_All, CL39.Contig2_All, CL39.Contig3_All, CL39.Contig4_All, CL4002.Contig1_All, CL4005.Contig2_All, CL4005.Contig3_All, CL4262.Contig2_All, CL4395.Contig1_All, CL44.Contig10_All, CL44.Contig12_All, CL44.Contig13_All, CL44.Contig16_All, CL44.Contig17_All, CL44.Contig18_All, CL44.Contig19_All, CL44.Contig1_All, CL44.Contig22_All, CL44.Contig23_All, CL44.Contig2_All, CL44.Contig3_All, CL44.Contig4_All, CL44.Contig5_All, CL44.Contig6_All, CL44.Contig8_All, CL44.Contig9_All, CL4439.Contig2_All, CL4509.Contig1_All, CL4509.Contig2_All, CL4521.Contig1_All, CL4521.Contig2_All, CL4521.Contig3_All, CL4521.Contig5_All, CL4787.Contig1_All, CL5064.Contig2_All, CL5098.Contig2_All, CL5391.Contig1_All, CL5391.Contig2_All, CL5399.Contig1_All, CL5399.Contig2_All, CL691.Contig1_All, CL741.Contig2_All, CL772.Contig1_All, CL772.Contig2_All, CL870.Contig4_All, CL870.Contig8_All, CL870.Contig9_All, CL940.Contig3_All, CL940.Contig5_All, Unigene10006_All, Unigene10574_All, Unigene11054_All, Unigene1168_All, Unigene12315_All, Unigene12671_All, Unigene12719_All, Unigene13853_All, Unigene1417_All, Unigene1512_All, Unigene16769_All, Unigene18898_All, Unigene18993_All, Unigene19148_All, Unigene19288_All, Unigene1941_All, Unigene2209_All, Unigene2233_All, Unigene3779_All, Unigene3996_All, Unigene4013_All, Unigene4022_All, Unigene4053_All, Unigene4070_All, Unigene4112_All, Unigene4935_All, Unigene4970_All, Unigene54_All, Unigene5675_All, Unigene5781_All, Unigene6242_All, Unigene661_All, Unigene6655_All, Unigene7704_All, Unigene7759_All, Unigene807_All, Unigene8422_All, Unigene8747_All, Unigene9437_All, Unigene9733_All, Unigene9904_All |
| 133 | <a href="#">Homologous recombination</a>                        | CL1795.Contig3_All, CL2300.Contig1_All, CL2372.Contig1_All, CL2372.Contig2_All, CL2372.Contig3_All, CL4073.Contig1_All, CL4073.Contig2_All, CL91.Contig1_All, Unigene10181_All, Unigene10182_All, Unigene10838_All, Unigene11936_All, Unigene3089_All, Unigene4102_All, Unigene4187_All, Unigene4238_All, Unigene8036_All, Unigene8228_All, Unigene9194_All                                                                                                                                                                                                                                                                                                                                                                                                                                                                                                                                                                                                                                                                                                                                                                                                                                                                                                                                                                                                                                                                                                                                                                                                                                                                                                                                                                                                                                                                                                                                                                                                                                                                                                                                                                                                                                             |

|     |                                                          |                                                                                                                                                                                                                                                                                                                                                                                                                                                                                                                                                                                                                                                                                                                                                                                                                                                                                                                                                                                                                                                                                                                                                                                                     |
|-----|----------------------------------------------------------|-----------------------------------------------------------------------------------------------------------------------------------------------------------------------------------------------------------------------------------------------------------------------------------------------------------------------------------------------------------------------------------------------------------------------------------------------------------------------------------------------------------------------------------------------------------------------------------------------------------------------------------------------------------------------------------------------------------------------------------------------------------------------------------------------------------------------------------------------------------------------------------------------------------------------------------------------------------------------------------------------------------------------------------------------------------------------------------------------------------------------------------------------------------------------------------------------------|
| 134 | <a href="#">Dorso-ventral axis formation</a>             | CL1099.Contig3_All, CL1193.Contig1_All, CL1193.Contig2_All, CL1193.Contig3_All, CL1548.Contig2_All, CL1548.Contig3_All, CL1807.Contig1_All, CL1807.Contig2_All, CL2375.Contig2_All, CL2563.Contig2_All, CL2824.Contig3_All, CL320.Contig1_All, CL320.Contig2_All, CL3206.Contig2_All, CL3223.Contig5_All, CL4439.Contig2_All, CL4622.Contig2_All, CL4787.Contig1_All, CL4994.Contig1_All, CL5296.Contig1_All, CL5432.Contig1_All, CL581.Contig7_All, CL581.Contig8_All, CL581.Contig9_All, Unigene10174_All, Unigene1040_All, Unigene11116_All, Unigene11119_All, Unigene11197_All, Unigene11521_All, Unigene11874_All, Unigene12034_All, Unigene12233_All, Unigene12359_All, Unigene1237_All, Unigene12523_All, Unigene12655_All, Unigene12661_All, Unigene12671_All, Unigene168_All, Unigene18046_All, Unigene18054_All, Unigene18262_All, Unigene18319_All, Unigene2106_All, Unigene2700_All, Unigene3080_All, Unigene32_All, Unigene3314_All, Unigene3423_All, Unigene4758_All, Unigene5064_All, Unigene5237_All, Unigene699_All, Unigene7093_All, Unigene7519_All, Unigene8046_All, Unigene8294_All, Unigene8747_All, Unigene8986_All, Unigene9065_All, Unigene9097_All, Unigene9527_All       |
| 135 | <a href="#">Vasopressin-regulated water reabsorption</a> | CL1452.Contig1_All, CL1920.Contig1_All, CL1920.Contig2_All, CL2382.Contig4_All, CL2437.Contig1_All, CL2437.Contig2_All, CL3282.Contig1_All, CL3282.Contig2_All, CL3282.Contig3_All, CL3920.Contig2_All, CL440.Contig3_All, CL440.Contig5_All, CL440.Contig6_All, CL4661.Contig1_All, CL4661.Contig2_All, CL940.Contig3_All, CL940.Contig5_All, CL969.Contig2_All, Unigene10058_All, Unigene1028_All, Unigene11033_All, Unigene11086_All, Unigene11935_All, Unigene11973_All, Unigene12330_All, Unigene12343_All, Unigene13618_All, Unigene13732_All, Unigene14005_All, Unigene16349_All, Unigene17864_All, Unigene18950_All, Unigene20226_All, Unigene2029_All, Unigene2058_All, Unigene2760_All, Unigene3094_All, Unigene3779_All, Unigene4112_All, Unigene4532_All, Unigene5688_All, Unigene6532_All, Unigene8002_All, Unigene9039_All, Unigene9733_All                                                                                                                                                                                                                                                                                                                                           |
| 136 | <a href="#">NOD-like receptor signaling pathway</a>      | CL268.Contig2_All, CL3671.Contig1_All, CL478.Contig2_All, CL478.Contig3_All, CL478.Contig4_All, CL478.Contig5_All, CL4966.Contig1_All, CL5115.Contig1_All, CL702.Contig2_All, CL702.Contig3_All, CL709.Contig1_All, Unigene11000_All, Unigene11053_All, Unigene15263_All, Unigene15265_All, Unigene16499_All, Unigene1757_All, Unigene17781_All, Unigene220_All, Unigene245_All, Unigene3131_All, Unigene5973_All, Unigene5974_All, Unigene5995_All, Unigene6797_All, Unigene7220_All, Unigene7737_All, Unigene8156_All                                                                                                                                                                                                                                                                                                                                                                                                                                                                                                                                                                                                                                                                             |
| 137 | <a href="#">Fc epsilon RI signaling pathway</a>          | CL1066.Contig1_All, CL1066.Contig2_All, CL1066.Contig3_All, CL1535.Contig3_All, CL1807.Contig1_All, CL1807.Contig2_All, CL1954.Contig1_All, CL1954.Contig2_All, CL1966.Contig2_All, CL199.Contig1_All, CL2129.Contig4_All, CL2182.Contig1_All, CL2182.Contig3_All, CL2182.Contig4_All, CL2432.Contig2_All, CL257.Contig1_All, CL257.Contig2_All, CL3047.Contig1_All, CL3047.Contig2_All, CL367.Contig1_All, CL367.Contig2_All, CL367.Contig3_All, CL39.Contig1_All, CL39.Contig2_All, CL39.Contig3_All, CL39.Contig4_All, CL3979.Contig1_All, CL3979.Contig2_All, CL4439.Contig2_All, CL4787.Contig1_All, CL4815.Contig1_All, CL4815.Contig2_All, CL4855.Contig1_All, CL4855.Contig2_All, CL4966.Contig1_All, CL5115.Contig1_All, CL5310.Contig2_All, CL5391.Contig1_All, CL5391.Contig2_All, CL695.Contig16_All, CL860.Contig10_All, CL860.Contig8_All, CL860.Contig9_All, CL940.Contig3_All, CL940.Contig5_All, Unigene10174_All, Unigene12139_All, Unigene12671_All, Unigene1326_All, Unigene18898_All, Unigene220_All, Unigene2749_All, Unigene3029_All, Unigene3033_All, Unigene3034_All, Unigene3036_All, Unigene3037_All, Unigene3042_All, Unigene6977_All, Unigene8046_All, Unigene8056_All |

|     |                                                              |                                                                                                                                                                                                                                                                                                                                                                                                                                                                                                                                                                                                                                                                                                                                                                                                                                                                                                                                                                                                                                                                                                                                                                                                                                                                                                                                                                                                                                                                                                                                                                                                                                                                                                                                                                                                                                                                                                                                                                                                                                                                                                                                                                                                                                                                                                                                                                                                                                                                                                                                                                                                                                                                                                                                                                                                                                                                                                                                                                                                                                                                                                                                                                                                                                                                                                                                                                                                                                                                                                                                                                                                                                                                                                                                                                                                                                                                                                       |
|-----|--------------------------------------------------------------|-------------------------------------------------------------------------------------------------------------------------------------------------------------------------------------------------------------------------------------------------------------------------------------------------------------------------------------------------------------------------------------------------------------------------------------------------------------------------------------------------------------------------------------------------------------------------------------------------------------------------------------------------------------------------------------------------------------------------------------------------------------------------------------------------------------------------------------------------------------------------------------------------------------------------------------------------------------------------------------------------------------------------------------------------------------------------------------------------------------------------------------------------------------------------------------------------------------------------------------------------------------------------------------------------------------------------------------------------------------------------------------------------------------------------------------------------------------------------------------------------------------------------------------------------------------------------------------------------------------------------------------------------------------------------------------------------------------------------------------------------------------------------------------------------------------------------------------------------------------------------------------------------------------------------------------------------------------------------------------------------------------------------------------------------------------------------------------------------------------------------------------------------------------------------------------------------------------------------------------------------------------------------------------------------------------------------------------------------------------------------------------------------------------------------------------------------------------------------------------------------------------------------------------------------------------------------------------------------------------------------------------------------------------------------------------------------------------------------------------------------------------------------------------------------------------------------------------------------------------------------------------------------------------------------------------------------------------------------------------------------------------------------------------------------------------------------------------------------------------------------------------------------------------------------------------------------------------------------------------------------------------------------------------------------------------------------------------------------------------------------------------------------------------------------------------------------------------------------------------------------------------------------------------------------------------------------------------------------------------------------------------------------------------------------------------------------------------------------------------------------------------------------------------------------------------------------------------------------------------------------------------------------------|
| 138 | <a href="#">HTLV-1 infection</a>                             | <p>CL1012.Contig4_All, CL1012.Contig5_All, CL1012.Contig6_All, CL1012.Contig7_All, CL1012.Contig9_All, CL1049.Contig4_All, CL1066.Contig1_All, CL1066.Contig2_All, CL1066.Contig3_All, CL1070.Contig6_All, CL1070.Contig7_All, CL131.Contig1_All, CL131.Contig2_All, CL1390.Contig4_All, CL1390.Contig5_All, CL1395.Contig2_All, CL1439.Contig1_All, CL1439.Contig2_All, CL1452.Contig1_All, CL1581.Contig1_All, CL1581.Contig2_All, CL1756.Contig1_All, CL1766.Contig1_All, CL1776.Contig1_All, CL1831.Contig1_All, CL1831.Contig2_All, CL1843.Contig3_All, CL1966.Contig2_All, CL1991.Contig2_All, CL1991.Contig3_All, CL1991.Contig4_All, CL2038.Contig1_All, CL2038.Contig7_All, CL2144.Contig1_All, CL2144.Contig2_All, CL2170.Contig2_All, CL2170.Contig5_All, CL2208.Contig1_All, CL2416.Contig1_All, CL2608.Contig1_All, CL2749.Contig2_All, CL2788.Contig2_All, CL2809.Contig2_All, CL2809.Contig3_All, CL2809.Contig8_All, CL2978.Contig2_All, CL2978.Contig3_All, CL3373.Contig1_All, CL3373.Contig2_All, CL3572.Contig1_All, CL358.Contig1_All, CL3632.Contig2_All, CL3632.Contig3_All, CL366.Contig1_All, CL367.Contig1_All, CL367.Contig2_All, CL367.Contig3_All, CL3695.Contig1_All, CL3695.Contig2_All, CL3920.Contig1_All, CL3920.Contig2_All, CL3920.Contig3_All, CL400.Contig1_All, CL400.Contig2_All, CL4005.Contig2_All, CL4005.Contig3_All, CL4105.Contig2_All, CL4190.Contig1_All, CL4247.Contig2_All, CL4247.Contig3_All, CL4262.Contig2_All, CL4271.Contig1_All, CL4278.Contig2_All, CL440.Contig3_All, CL440.Contig5_All, CL440.Contig6_All, CL4439.Contig2_All, CL4510.Contig1_All, CL4521.Contig1_All, CL4521.Contig2_All, CL4521.Contig3_All, CL4521.Contig5_All, CL4555.Contig1_All, CL4567.Contig2_All, CL4633.Contig1_All, CL4633.Contig2_All, CL4657.Contig2_All, CL4736.Contig1_All, CL4736.Contig2_All, CL475.Contig4_All, CL4874.Contig1_All, CL4887.Contig2_All, CL4896.Contig1_All, CL493.Contig2_All, CL5064.Contig2_All, CL5111.Contig1_All, CL5115.Contig1_All, CL5206.Contig1_All, CL5218.Contig1_All, CL5218.Contig2_All, CL5263.Contig1_All, CL5263.Contig2_All, CL5427.Contig2_All, CL695.Contig16_All, CL874.Contig10_All, CL874.Contig8_All, CL91.Contig1_All, CL940.Contig3_All, CL940.Contig5_All, Unigene10252_All, Unigene10253_All, Unigene10763_All, Unigene10817_All, Unigene11321_All, Unigene11357_All, Unigene11422_All, Unigene1181_All, Unigene11845_All, Unigene11860_All, Unigene11922_All, Unigene12099_All, Unigene1229_All, Unigene12361_All, Unigene12398_All, Unigene12469_All, Unigene12660_All, Unigene12664_All, Unigene12671_All, Unigene12713_All, Unigene12722_All, Unigene13853_All, Unigene1459_All, Unigene1479_All, Unigene15790_All, Unigene16098_All, Unigene17292_All, Unigene17478_All, Unigene1757_All, Unigene17674_All, Unigene17675_All, Unigene18118_All, Unigene18119_All, Unigene18127_All, Unigene1823_All, Unigene18284_All, Unigene18584_All, Unigene19116_All, Unigene1944_All, Unigene20260_All, Unigene20279_All, Unigene2029_All, Unigene20308_All, Unigene2050_All, Unigene220_All, Unigene22_All, Unigene230_All, Unigene236_All, Unigene2374_All, Unigene247_All, Unigene2749_All, Unigene3168_All, Unigene3171_All, Unigene3632_All, Unigene3779_All, Unigene3830_All, Unigene3975_All, Unigene4102_All, Unigene4112_All, Unigene4731_All, Unigene47_All, Unigene4801_All, Unigene5175_All, Unigene5196_All, Unigene54_All, Unigene5727_All, Unigene5781_All, Unigene5897_All, Unigene6048_All, Unigene6101_All, Unigene695_All, Unigene6977_All, Unigene700_All, Unigene7163_All, Unigene7297_All, Unigene766_All, Unigene7702_All, Unigene7747_All, Unigene783_All, Unigene7886_All, Unigene8014_All, Unigene8174_All, Unigene8228_All, Unigene8605_All, Unigene8784_All, Unigene8861_All, Unigene8972_All, Unigene9125_All, Unigene9237_All, Unigene93_All, Unigene9733_All, Unigene9989_All</p> |
| 139 | <a href="#">Arginine and proline metabolism</a>              | <p>CL1707.Contig1_All, CL1780.Contig1_All, CL1780.Contig2_All, CL1868.Contig1_All, CL1868.Contig2_All, CL1868.Contig4_All, CL1892.Contig1_All, CL1892.Contig2_All, CL1892.Contig3_All, CL1892.Contig5_All, CL2309.Contig2_All, CL2309.Contig3_All, CL2694.Contig1_All, CL2694.Contig3_All, CL3118.Contig1_All, CL3118.Contig2_All, CL313.Contig2_All, CL3235.Contig1_All, CL3235.Contig2_All, CL3283.Contig1_All, CL3315.Contig3_All, CL3315.Contig4_All, CL348.Contig1_All, CL348.Contig2_All, CL3643.Contig2_All, CL3643.Contig6_All, CL4144.Contig3_All, CL4144.Contig4_All, CL4446.Contig1_All, CL4446.Contig2_All, CL4451.Contig1_All, CL4451.Contig2_All, CL4753.Contig1_All, CL4873.Contig2_All, CL5083.Contig2_All, CL5197.Contig2_All, CL5288.Contig2_All, CL5320.Contig2_All, CL567.Contig4_All, CL580.Contig2_All, CL584.Contig10_All, CL584.Contig15_All, CL584.Contig17_All, CL584.Contig1_All, CL584.Contig3_All, CL584.Contig4_All, CL584.Contig6_All, CL584.Contig7_All, Unigene10278_All, Unigene10282_All, Unigene10299_All, Unigene10412_All, Unigene10526_All, Unigene10686_All, Unigene10908_All, Unigene10909_All, Unigene10910_All, Unigene11012_All, Unigene11013_All, Unigene11336_All, Unigene11575_All, Unigene1197_All, Unigene12216_All, Unigene12325_All, Unigene12470_All, Unigene12475_All, Unigene12600_All, Unigene12958_All, Unigene13121_All, Unigene13245_All, Unigene1327_All, Unigene13410_All, Unigene13773_All, Unigene13925_All, Unigene15270_All, Unigene16206_All, Unigene1623_All, Unigene17527_All, Unigene18101_All, Unigene18234_All, Unigene18440_All, Unigene186_All, Unigene19038_All, Unigene261_All, Unigene3134_All, Unigene3324_All, Unigene3450_All, Unigene3482_All, Unigene3655_All, Unigene5053_All, Unigene5433_All, Unigene6134_All, Unigene6358_All, Unigene6360_All, Unigene6708_All, Unigene6731_All, Unigene703_All, Unigene9060_All, Unigene9215_All, Unigene9262_All, Unigene9708_All</p>                                                                                                                                                                                                                                                                                                                                                                                                                                                                                                                                                                                                                                                                                                                                                                                                                                                                                                                                                                                                                                                                                                                                                                                                                                                                                                                                                                                                                                                                                                                                                                                                                                                                                                                                                                                                                                                                                                                                          |
| 140 | <a href="#">RNA polymerase</a>                               | <p>CL1356.Contig1_All, CL1356.Contig2_All, CL1411.Contig8_All, CL1683.Contig2_All, CL1683.Contig7_All, CL322.Contig5_All, CL322.Contig6_All, CL3251.Contig1_All, CL3251.Contig2_All, CL3420.Contig1_All, CL3635.Contig3_All, CL3657.Contig3_All, CL3664.Contig1_All, CL3664.Contig2_All, CL3792.Contig3_All, CL5004.Contig1_All, CL5461.Contig2_All, CL598.Contig1_All, CL598.Contig2_All, CL63.Contig10_All, CL63.Contig9_All, Unigene11623_All, Unigene12017_All, Unigene1205_All, Unigene12060_All, Unigene12080_All, Unigene12096_All, Unigene12117_All, Unigene12479_All, Unigene12488_All, Unigene1278_All, Unigene13002_All, Unigene13284_All, Unigene15827_All, Unigene18801_All, Unigene19657_All, Unigene2037_All, Unigene2131_All, Unigene24_All, Unigene2513_All, Unigene3081_All, Unigene3288_All, Unigene3390_All, Unigene33_All, Unigene3659_All, Unigene4251_All, Unigene5745_All, Unigene7192_All, Unigene7296_All, Unigene7750_All, Unigene7993_All, Unigene8008_All, Unigene8228_All, Unigene8236_All, Unigene9107_All, Unigene9758_All</p>                                                                                                                                                                                                                                                                                                                                                                                                                                                                                                                                                                                                                                                                                                                                                                                                                                                                                                                                                                                                                                                                                                                                                                                                                                                                                                                                                                                                                                                                                                                                                                                                                                                                                                                                                                                                                                                                                                                                                                                                                                                                                                                                                                                                                                                                                                                                                                                                                                                                                                                                                                                                                                                                                                                                                                                                                                        |
| 141 | <a href="#">Glycosphingolipid biosynthesis - globoseries</a> | CL3965.Contig1_All, CL3965.Contig2_All, CL3965.Contig4_All, Unigene17953_All, Unigene5646_All, Unigene8139_All, Unigene9260_All, Unigene9314_All                                                                                                                                                                                                                                                                                                                                                                                                                                                                                                                                                                                                                                                                                                                                                                                                                                                                                                                                                                                                                                                                                                                                                                                                                                                                                                                                                                                                                                                                                                                                                                                                                                                                                                                                                                                                                                                                                                                                                                                                                                                                                                                                                                                                                                                                                                                                                                                                                                                                                                                                                                                                                                                                                                                                                                                                                                                                                                                                                                                                                                                                                                                                                                                                                                                                                                                                                                                                                                                                                                                                                                                                                                                                                                                                                      |

|     |                                                                      |                                                                                                                                                                                                                                                                                                                                                                                                                                                                                                                                                                                                                                                                                                                                                                                                                                                                                                                                                                                                                                                                                                                                                                                                                                                                                                                                                                                                                                                                                                                                                                                                                                                                                                                                                                                                                                                                                                                                                                                                                                                                                                                                                                                                                                                                                                                                                                              |
|-----|----------------------------------------------------------------------|------------------------------------------------------------------------------------------------------------------------------------------------------------------------------------------------------------------------------------------------------------------------------------------------------------------------------------------------------------------------------------------------------------------------------------------------------------------------------------------------------------------------------------------------------------------------------------------------------------------------------------------------------------------------------------------------------------------------------------------------------------------------------------------------------------------------------------------------------------------------------------------------------------------------------------------------------------------------------------------------------------------------------------------------------------------------------------------------------------------------------------------------------------------------------------------------------------------------------------------------------------------------------------------------------------------------------------------------------------------------------------------------------------------------------------------------------------------------------------------------------------------------------------------------------------------------------------------------------------------------------------------------------------------------------------------------------------------------------------------------------------------------------------------------------------------------------------------------------------------------------------------------------------------------------------------------------------------------------------------------------------------------------------------------------------------------------------------------------------------------------------------------------------------------------------------------------------------------------------------------------------------------------------------------------------------------------------------------------------------------------|
| 142 | <a href="#">Circadian rhythm - mammal</a>                            | CL2599.Contig1_All, CL2599.Contig2_All, CL2838.Contig1_All, CL2838.Contig2_All, CL2838.Contig4_All, CL3787.Contig1_All, CL3787.Contig2_All, CL4514.Contig2_All, Unigene10876_All, Unigene11040_All, Unigene11411_All, Unigene12740_All, Unigene12903_All, Unigene3715_All, Unigene4765_All, Unigene4975_All, Unigene7671_All, Unigene798_All, Unigene9006_All                                                                                                                                                                                                                                                                                                                                                                                                                                                                                                                                                                                                                                                                                                                                                                                                                                                                                                                                                                                                                                                                                                                                                                                                                                                                                                                                                                                                                                                                                                                                                                                                                                                                                                                                                                                                                                                                                                                                                                                                                |
| 143 | <a href="#">Melanoma</a>                                             | CL1066.Contig1_All, CL1066.Contig2_All, CL1066.Contig3_All, CL1548.Contig2_All, CL1548.Contig3_All, CL241.Contig1_All, CL241.Contig7_All, CL2505.Contig3_All, CL2505.Contig4_All, CL2552.Contig3_All, CL2658.Contig1_All, CL2658.Contig2_All, CL3373.Contig1_All, CL3373.Contig2_All, CL3567.Contig1_All, CL3567.Contig2_All, CL3567.Contig3_All, CL367.Contig1_All, CL367.Contig2_All, CL367.Contig3_All, CL4381.Contig1_All, CL4439.Contig2_All, CL4787.Contig1_All, CL695.Contig16_All, CL95.Contig1_All, Unigene12099_All, Unigene12671_All, Unigene1679_All, Unigene2374_All, Unigene2749_All, Unigene699_All, Unigene8747_All, Unigene90_All, Unigene9740_All                                                                                                                                                                                                                                                                                                                                                                                                                                                                                                                                                                                                                                                                                                                                                                                                                                                                                                                                                                                                                                                                                                                                                                                                                                                                                                                                                                                                                                                                                                                                                                                                                                                                                                          |
| 144 | <a href="#">Asthma</a>                                               | Unigene833_All                                                                                                                                                                                                                                                                                                                                                                                                                                                                                                                                                                                                                                                                                                                                                                                                                                                                                                                                                                                                                                                                                                                                                                                                                                                                                                                                                                                                                                                                                                                                                                                                                                                                                                                                                                                                                                                                                                                                                                                                                                                                                                                                                                                                                                                                                                                                                               |
| 145 | <a href="#">Nicotine addiction</a>                                   | CL1069.Contig1_All, CL1069.Contig2_All, CL1069.Contig3_All, CL1069.Contig4_All, CL1069.Contig5_All, CL1069.Contig6_All, CL1069.Contig7_All, CL1069.Contig8_All, CL2161.Contig1_All, CL2161.Contig2_All, CL225.Contig1_All, CL225.Contig3_All, CL2703.Contig2_All, CL2735.Contig1_All, CL3166.Contig1_All, CL3507.Contig1_All, CL5105.Contig1_All, CL5105.Contig2_All, CL677.Contig2_All, CL679.Contig1_All, CL679.Contig2_All, CL847.Contig3_All, CL870.Contig4_All, CL870.Contig8_All, CL870.Contig9_All, CL894.Contig1_All, CL973.Contig1_All, Unigene1044_All, Unigene10931_All, Unigene11615_All, Unigene12433_All, Unigene12535_All, Unigene13612_All, Unigene1417_All, Unigene16890_All, Unigene1766_All, Unigene17896_All, Unigene18199_All, Unigene19148_All, Unigene2032_All, Unigene3357_All, Unigene661_All, Unigene68_All, Unigene7042_All, Unigene8071_All, Unigene8170_All, Unigene8993_All, Unigene9167_All                                                                                                                                                                                                                                                                                                                                                                                                                                                                                                                                                                                                                                                                                                                                                                                                                                                                                                                                                                                                                                                                                                                                                                                                                                                                                                                                                                                                                                                   |
| 146 | <a href="#">Glycosaminoglycan biosynthesis - chondroitin sulfate</a> | CL1070.Contig6_All, CL1070.Contig7_All, CL424.Contig1_All, CL424.Contig2_All, CL5118.Contig2_All, CL5417.Contig1_All, CL5417.Contig2_All, Unigene12126_All, Unigene5634_All, Unigene5903_All, Unigene6931_All, Unigene7375_All                                                                                                                                                                                                                                                                                                                                                                                                                                                                                                                                                                                                                                                                                                                                                                                                                                                                                                                                                                                                                                                                                                                                                                                                                                                                                                                                                                                                                                                                                                                                                                                                                                                                                                                                                                                                                                                                                                                                                                                                                                                                                                                                               |
| 147 | <a href="#">Malaria</a>                                              | CL2658.Contig1_All, CL2658.Contig2_All, CL3236.Contig1_All, CL4381.Contig1_All, CL4535.Contig1_All, CL4597.Contig2_All, Unigene10373_All, Unigene10999_All, Unigene11371_All, Unigene13362_All, Unigene1679_All, Unigene19844_All, Unigene20095_All, Unigene3945_All, Unigene6791_All, Unigene8217_All, Unigene8915_All                                                                                                                                                                                                                                                                                                                                                                                                                                                                                                                                                                                                                                                                                                                                                                                                                                                                                                                                                                                                                                                                                                                                                                                                                                                                                                                                                                                                                                                                                                                                                                                                                                                                                                                                                                                                                                                                                                                                                                                                                                                      |
| 148 | <a href="#">Valine, leucine and isoleucine biosynthesis</a>          | CL1404.Contig2_All, CL2294.Contig4_All, Unigene11062_All, Unigene12491_All, Unigene12589_All, Unigene12801_All, Unigene12959_All, Unigene13041_All, Unigene17053_All, Unigene17410_All, Unigene18312_All, Unigene18842_All, Unigene5691_All, Unigene6618_All                                                                                                                                                                                                                                                                                                                                                                                                                                                                                                                                                                                                                                                                                                                                                                                                                                                                                                                                                                                                                                                                                                                                                                                                                                                                                                                                                                                                                                                                                                                                                                                                                                                                                                                                                                                                                                                                                                                                                                                                                                                                                                                 |
| 149 | <a href="#">Cell cycle</a>                                           | CL131.Contig1_All, CL131.Contig2_All, CL1439.Contig1_All, CL1439.Contig2_All, CL1590.Contig4_All, CL1660.Contig10_All, CL1660.Contig15_All, CL1660.Contig16_All, CL1660.Contig1_All, CL1660.Contig3_All, CL1660.Contig5_All, CL1660.Contig6_All, CL1660.Contig7_All, CL1660.Contig8_All, CL1660.Contig9_All, CL1766.Contig1_All, CL1843.Contig3_All, CL1949.Contig6_All, CL2170.Contig2_All, CL2170.Contig5_All, CL2171.Contig2_All, CL2235.Contig1_All, CL2235.Contig2_All, CL2416.Contig1_All, CL249.Contig1_All, CL249.Contig3_All, CL249.Contig5_All, CL249.Contig6_All, CL2515.Contig1_All, CL2546.Contig1_All, CL2749.Contig2_All, CL2809.Contig2_All, CL2809.Contig3_All, CL2809.Contig8_All, CL2893.Contig1_All, CL2893.Contig2_All, CL2978.Contig2_All, CL2978.Contig3_All, CL3373.Contig1_All, CL3373.Contig2_All, CL4025.Contig3_All, CL4025.Contig4_All, CL415.Contig1_All, CL4319.Contig2_All, CL4335.Contig1_All, CL4335.Contig2_All, CL4402.Contig1_All, CL4514.Contig2_All, CL4615.Contig2_All, CL5064.Contig2_All, CL5206.Contig1_All, CL5218.Contig1_All, CL5218.Contig2_All, CL5304.Contig1_All, CL570.Contig1_All, CL570.Contig2_All, Unigene10019_All, Unigene10252_All, Unigene10253_All, Unigene10876_All, Unigene11040_All, Unigene1109_All, Unigene11227_All, Unigene11228_All, Unigene1125_All, Unigene11411_All, Unigene1181_All, Unigene11922_All, Unigene12099_All, Unigene12142_All, Unigene12161_All, Unigene1229_All, Unigene12361_All, Unigene12469_All, Unigene12522_All, Unigene12664_All, Unigene12740_All, Unigene12903_All, Unigene13421_All, Unigene14019_All, Unigene1538_All, Unigene16349_All, Unigene1663_All, Unigene17863_All, Unigene18584_All, Unigene198_All, Unigene20083_All, Unigene20226_All, Unigene2050_All, Unigene236_All, Unigene2374_All, Unigene247_All, Unigene3103_All, Unigene3171_All, Unigene4140_All, Unigene4156_All, Unigene47_All, Unigene4801_All, Unigene4808_All, Unigene4975_All, Unigene5070_All, Unigene5179_All, Unigene54_All, Unigene5781_All, Unigene5896_All, Unigene5897_All, Unigene6041_All, Unigene6253_All, Unigene6526_All, Unigene6667_All, Unigene6981_All, Unigene700_All, Unigene7297_All, Unigene7299_All, Unigene756_All, Unigene7671_All, Unigene7747_All, Unigene7869_All, Unigene7983_All, Unigene8075_All, Unigene8784_All, Unigene8972_All, Unigene9076_All, Unigene9264_All |
| 150 | <a href="#">Type II diabetes mellitus</a>                            | CL1009.Contig1_All, CL1049.Contig4_All, CL1066.Contig1_All, CL1066.Contig2_All, CL1066.Contig3_All, CL241.Contig1_All, CL241.Contig7_All, CL2505.Contig3_All, CL2505.Contig4_All, CL3047.Contig1_All, CL3047.Contig2_All, CL367.Contig1_All, CL367.Contig2_All, CL367.Contig3_All, CL3796.Contig2_All, CL3796.Contig3_All, CL4040.Contig1_All, CL4855.Contig1_All, CL4855.Contig2_All, CL493.Contig2_All, CL5115.Contig1_All, CL695.Contig16_All, CL95.Contig1_All, CL95.Contig2_All, Unigene12112_All, Unigene12660_All, Unigene1279_All, Unigene18663_All, Unigene2032_All, Unigene220_All, Unigene3836_All, Unigene695_All, Unigene699_All, Unigene8056_All, Unigene8621_All, Unigene9730_All                                                                                                                                                                                                                                                                                                                                                                                                                                                                                                                                                                                                                                                                                                                                                                                                                                                                                                                                                                                                                                                                                                                                                                                                                                                                                                                                                                                                                                                                                                                                                                                                                                                                             |

|     |                                                           |                                                                                                                                                                                                                                                                                                                                                                                                                                                                                                                                                                                                                                                                                                                                                                                                                                                                                                                                                                                                                                                                                                                                                                                                                                                                                        |
|-----|-----------------------------------------------------------|----------------------------------------------------------------------------------------------------------------------------------------------------------------------------------------------------------------------------------------------------------------------------------------------------------------------------------------------------------------------------------------------------------------------------------------------------------------------------------------------------------------------------------------------------------------------------------------------------------------------------------------------------------------------------------------------------------------------------------------------------------------------------------------------------------------------------------------------------------------------------------------------------------------------------------------------------------------------------------------------------------------------------------------------------------------------------------------------------------------------------------------------------------------------------------------------------------------------------------------------------------------------------------------|
| 151 | <a href="#">Hepatitis C</a>                               | CL1066.Contig1_All, CL1066.Contig2_All, CL1066.Contig3_All, CL1387.Contig1_All, CL1387.Contig3_All, CL1548.Contig2_All, CL1548.Contig3_All, CL1807.Contig1_All, CL1807.Contig2_All, CL1843.Contig3_All, CL2049.Contig1_All, CL2049.Contig3_All, CL2306.Contig2_All, CL2789.Contig2_All, CL2873.Contig1_All, CL2873.Contig2_All, CL345.Contig1_All, CL367.Contig1_All, CL367.Contig2_All, CL367.Contig3_All, CL4439.Contig2_All, CL4966.Contig1_All, CL5115.Contig1_All, CL5204.Contig1_All, CL5204.Contig2_All, CL695.Contig16_All, CL761.Contig1_All, CL761.Contig2_All, CL880.Contig3_All, Unigene10001_All, Unigene10174_All, Unigene10242_All, Unigene11874_All, Unigene11922_All, Unigene12006_All, Unigene12259_All, Unigene12314_All, Unigene12393_All, Unigene1247_All, Unigene12671_All, Unigene13073_All, Unigene13432_All, Unigene14208_All, Unigene17046_All, Unigene1757_All, Unigene220_All, Unigene236_All, Unigene247_All, Unigene2749_All, Unigene6020_All, Unigene699_All, Unigene7286_All, Unigene7297_All, Unigene8046_All, Unigene8747_All, Unigene8784_All, Unigene9251_All                                                                                                                                                                                      |
| 152 | <a href="#">DNA replication</a>                           | CL1395.Contig2_All, CL1590.Contig4_All, CL2702.Contig1_All, CL2702.Contig2_All, CL2827.Contig4_All, CL2986.Contig2_All, CL3770.Contig2_All, CL4025.Contig3_All, CL4025.Contig4_All, CL4278.Contig2_All, CL4989.Contig1_All, CL4989.Contig2_All, CL91.Contig1_All, Unigene10181_All, Unigene10182_All, Unigene10261_All, Unigene10549_All, Unigene10838_All, Unigene12220_All, Unigene12361_All, Unigene14019_All, Unigene1505_All, Unigene15790_All, Unigene17292_All, Unigene18127_All, Unigene18761_All, Unigene20279_All, Unigene2890_All, Unigene4102_All, Unigene4925_All, Unigene5992_All, Unigene704_All, Unigene8228_All, Unigene8709_All, Unigene996_All                                                                                                                                                                                                                                                                                                                                                                                                                                                                                                                                                                                                                      |
| 153 | <a href="#">Folate biosynthesis</a>                       | CL1313.Contig4_All, CL15.Contig1_All, CL15.Contig2_All, CL15.Contig3_All, CL1521.Contig1_All, CL1521.Contig2_All, CL1521.Contig3_All, CL1521.Contig5_All, CL2053.Contig1_All, CL2053.Contig2_All, CL4195.Contig2_All, CL4256.Contig1_All, CL5368.Contig1_All, Unigene13292_All, Unigene13418_All, Unigene17515_All, Unigene9941_All                                                                                                                                                                                                                                                                                                                                                                                                                                                                                                                                                                                                                                                                                                                                                                                                                                                                                                                                                    |
| 154 | <a href="#">Taurine and hypotaurine metabolism</a>        | CL143.Contig1_All, CL143.Contig2_All, CL1599.Contig1_All, CL1599.Contig2_All, CL2671.Contig2_All, CL317.Contig2_All, Unigene10419_All                                                                                                                                                                                                                                                                                                                                                                                                                                                                                                                                                                                                                                                                                                                                                                                                                                                                                                                                                                                                                                                                                                                                                  |
| 155 | <a href="#">Pantothenate and CoA biosynthesis</a>         | CL1156.Contig3_All, CL1388.Contig1_All, CL1404.Contig2_All, CL27.Contig5_All, CL3129.Contig1_All, CL3129.Contig2_All, CL3129.Contig5_All, CL4346.Contig1_All, CL4790.Contig1_All, CL4790.Contig2_All, Unigene11026_All, Unigene11027_All, Unigene12959_All, Unigene13035_All, Unigene18595_All, Unigene20289_All                                                                                                                                                                                                                                                                                                                                                                                                                                                                                                                                                                                                                                                                                                                                                                                                                                                                                                                                                                       |
| 156 | <a href="#">Cocaine addiction</a>                         | CL1066.Contig1_All, CL1066.Contig2_All, CL1302.Contig1_All, CL1302.Contig2_All, CL1452.Contig1_All, CL2253.Contig2_All, CL2801.Contig1_All, CL2801.Contig2_All, CL3023.Contig1_All, CL3023.Contig2_All, CL3023.Contig3_All, CL3023.Contig4_All, CL3023.Contig5_All, CL3286.Contig1_All, CL3920.Contig2_All, CL3948.Contig3_All, CL4594.Contig1_All, CL4736.Contig1_All, CL4736.Contig2_All, CL870.Contig4_All, CL870.Contig8_All, CL870.Contig9_All, CL940.Contig3_All, CL940.Contig5_All, Unigene10058_All, Unigene11915_All, Unigene1417_All, Unigene1479_All, Unigene1757_All, Unigene19148_All, Unigene2029_All, Unigene2193_All, Unigene3779_All, Unigene4112_All, Unigene4116_All, Unigene4532_All, Unigene5074_All, Unigene5261_All, Unigene5521_All, Unigene5869_All, Unigene6217_All, Unigene661_All, Unigene7298_All, Unigene7702_All, Unigene9733_All                                                                                                                                                                                                                                                                                                                                                                                                                       |
| 157 | <a href="#">RNA degradation</a>                           | CL1127.Contig2_All, CL1127.Contig8_All, CL1542.Contig1_All, CL1542.Contig2_All, CL1714.Contig4_All, CL2154.Contig1_All, CL2154.Contig2_All, CL2865.Contig1_All, CL2865.Contig2_All, CL3436.Contig1_All, CL3436.Contig4_All, CL3436.Contig9_All, CL3960.Contig1_All, CL3960.Contig2_All, CL4417.Contig1_All, CL443.Contig1_All, CL4549.Contig1_All, CL4549.Contig2_All, CL4900.Contig2_All, CL739.Contig2_All, CL848.Contig2_All, CL893.Contig1_All, CL980.Contig1_All, CL980.Contig3_All, Unigene10041_All, Unigene10111_All, Unigene103_All, Unigene11061_All, Unigene11099_All, Unigene11245_All, Unigene11246_All, Unigene11380_All, Unigene11919_All, Unigene12005_All, Unigene12046_All, Unigene12122_All, Unigene12129_All, Unigene12202_All, Unigene12383_All, Unigene12681_All, Unigene12696_All, Unigene12841_All, Unigene13060_All, Unigene13157_All, Unigene13261_All, Unigene153_All, Unigene1570_All, Unigene1711_All, Unigene1811_All, Unigene18194_All, Unigene18319_All, Unigene2035_All, Unigene2513_All, Unigene2753_All, Unigene2772_All, Unigene3083_All, Unigene3179_All, Unigene3750_All, Unigene43_All, Unigene7202_All, Unigene8032_All, Unigene8248_All, Unigene8353_All, Unigene8655_All, Unigene9000_All, Unigene9106_All, Unigene9182_All, Unigene9611_All |
| 158 | <a href="#">Other types of O-glycan biosynthesis</a>      | CL1176.Contig4_All, CL2308.Contig1_All, CL2370.Contig2_All, CL2370.Contig3_All, CL2370.Contig4_All, CL26.Contig3_All, CL3654.Contig1_All, CL3654.Contig2_All, CL3827.Contig2_All, CL4110.Contig1_All, CL4110.Contig2_All, CL490.Contig1_All, CL490.Contig2_All, CL490.Contig3_All, CL5334.Contig2_All, CL720.Contig1_All, CL720.Contig4_All, CL744.Contig1_All, CL744.Contig2_All, Unigene1120_All, Unigene1143_All, Unigene12098_All, Unigene12297_All, Unigene147_All, Unigene15946_All, Unigene18028_All, Unigene18489_All, Unigene2107_All, Unigene2312_All, Unigene2660_All, Unigene3012_All, Unigene3125_All, Unigene3132_All, Unigene3701_All, Unigene3771_All, Unigene4342_All, Unigene4564_All, Unigene4675_All, Unigene526_All, Unigene5637_All, Unigene5751_All, Unigene6129_All, Unigene6276_All, Unigene6650_All, Unigene6673_All, Unigene8049_All, Unigene8218_All, Unigene9227_All                                                                                                                                                                                                                                                                                                                                                                                      |
| 159 | <a href="#">Natural killer cell mediated cytotoxicity</a> | CL1066.Contig1_All, CL1066.Contig2_All, CL1066.Contig3_All, CL1535.Contig3_All, CL1807.Contig1_All, CL1807.Contig2_All, CL1831.Contig1_All, CL1831.Contig2_All, CL1874.Contig2_All, CL1954.Contig1_All, CL1954.Contig2_All, CL2182.Contig1_All, CL2182.Contig3_All, CL2182.Contig4_All, CL2222.Contig9_All, CL257.Contig1_All, CL257.Contig2_All, CL367.Contig1_All, CL367.Contig2_All, CL367.Contig3_All, CL39.Contig1_All, CL39.Contig2_All, CL39.Contig3_All, CL39.Contig4_All, CL3979.Contig1_All, CL3979.Contig2_All, CL4190.Contig1_All, CL4439.Contig2_All, CL4521.Contig1_All, CL4521.Contig2_All, CL4521.Contig3_All, CL4521.Contig5_All, CL4559.Contig2_All, CL4559.Contig3_All, CL4787.Contig1_All, CL5064.Contig2_All, CL5391.Contig1_All, CL5391.Contig2_All, CL5391.Contig3_All, CL5469.Contig2_All, CL695.Contig16_All, CL940.Contig3_All, CL940.Contig5_All, Unigene10174_All, Unigene12671_All, Unigene13853_All, Unigene18898_All, Unigene20260_All, Unigene7016_All, Unigene8046_All, Unigene80_All, Unigene8747_All, Unigene9719_All                                                                                                                                                                                                                               |



|     |                                              |                                                                                                                                                                                                                                                                                                                                                                                                                                                                                                                                                                                                                                                                                                                                                                                                                                                                                                                                                                                                                                                                                                                                                                                                                                                                                                                                                                                                                                                                                                                                                                                                                                                                                                                                        |
|-----|----------------------------------------------|----------------------------------------------------------------------------------------------------------------------------------------------------------------------------------------------------------------------------------------------------------------------------------------------------------------------------------------------------------------------------------------------------------------------------------------------------------------------------------------------------------------------------------------------------------------------------------------------------------------------------------------------------------------------------------------------------------------------------------------------------------------------------------------------------------------------------------------------------------------------------------------------------------------------------------------------------------------------------------------------------------------------------------------------------------------------------------------------------------------------------------------------------------------------------------------------------------------------------------------------------------------------------------------------------------------------------------------------------------------------------------------------------------------------------------------------------------------------------------------------------------------------------------------------------------------------------------------------------------------------------------------------------------------------------------------------------------------------------------------|
| 160 | <a href="#">Pyruvate metabolism</a>          | CL2294.Contig4_All, CL2309.Contig2_All, CL2309.Contig3_All, CL2430.Contig3_All, CL2557.Contig1_All, CL2694.Contig1_All, CL2694.Contig3_All, CL3832.Contig1_All, CL4130.Contig1_All, CL4130.Contig2_All, CL4144.Contig3_All, CL4144.Contig4_All, CL4355.Contig1_All, CL4355.Contig2_All, CL4451.Contig1_All, CL4451.Contig2_All, CL4753.Contig1_All, CL4971.Contig2_All, CL5301.Contig1_All, CL5301.Contig2_All, CL957.Contig6_All, Unigene10029_All, Unigene10098_All, Unigene10282_All, Unigene10299_All, Unigene10526_All, Unigene10686_All, Unigene10818_All, Unigene10908_All, Unigene11062_All, Unigene11186_All, Unigene11187_All, Unigene11188_All, Unigene11838_All, Unigene11930_All, Unigene1197_All, Unigene12053_All, Unigene12140_All, Unigene12219_All, Unigene12399_All, Unigene12491_All, Unigene12589_All, Unigene12643_All, Unigene12732_All, Unigene12752_All, Unigene12801_All, Unigene12918_All, Unigene13410_All, Unigene13671_All, Unigene13673_All, Unigene13773_All, Unigene15270_All, Unigene16206_All, Unigene16508_All, Unigene16942_All, Unigene17053_All, Unigene17410_All, Unigene17527_All, Unigene17957_All, Unigene18101_All, Unigene1811_All, Unigene18238_All, Unigene18312_All, Unigene18663_All, Unigene186_All, Unigene18841_All, Unigene18842_All, Unigene19038_All, Unigene19153_All, Unigene19332_All, Unigene19366_All, Unigene19739_All, Unigene1980_All, Unigene20691_All, Unigene20727_All, Unigene20815_All, Unigene236_All, Unigene2496_All, Unigene3282_All, Unigene3450_All, Unigene5053_All, Unigene627_All, Unigene6360_All, Unigene6618_All, Unigene6695_All, Unigene6954_All, Unigene7271_All, Unigene8037_All, Unigene8563_All, Unigene8732_All, Unigene874_All, Unigene999_All |
| 161 | <a href="#">Endometrial cancer</a>           | CL1066.Contig1_All, CL1066.Contig2_All, CL1066.Contig3_All, CL1104.Contig1_All, CL1104.Contig2_All, CL1104.Contig3_All, CL1104.Contig4_All, CL1104.Contig5_All, CL1104.Contig6_All, CL1104.Contig7_All, CL1104.Contig8_All, CL1104.Contig9_All, CL120.Contig2_All, CL1548.Contig2_All, CL1548.Contig3_All, CL1795.Contig5_All, CL1807.Contig1_All, CL1807.Contig2_All, CL1843.Contig3_All, CL2034.Contig1_All, CL2034.Contig2_All, CL2552.Contig3_All, CL2788.Contig2_All, CL3436.Contig1_All, CL3436.Contig4_All, CL3436.Contig9_All, CL367.Contig1_All, CL367.Contig2_All, CL367.Contig3_All, CL400.Contig1_All, CL400.Contig2_All, CL4158.Contig4_All, CL4158.Contig5_All, CL4158.Contig7_All, CL4439.Contig2_All, CL4787.Contig1_All, CL5212.Contig1_All, CL5212.Contig2_All, CL695.Contig16_All, Unigene10174_All, Unigene11922_All, Unigene12671_All, Unigene150_All, Unigene236_All, Unigene247_All, Unigene2742_All, Unigene2749_All, Unigene5727_All, Unigene6101_All, Unigene699_All, Unigene7297_All, Unigene777_All, Unigene783_All, Unigene8046_All, Unigene8747_All, Unigene8784_All, Unigene9740_All                                                                                                                                                                                                                                                                                                                                                                                                                                                                                                                                                                                                                    |
| 162 | <a href="#">Hematopoietic cell lineage</a>   | CL1062.Contig2_All, CL1175.Contig1_All, CL1175.Contig2_All, CL1370.Contig4_All, CL2331.Contig2_All, CL2331.Contig3_All, CL300.Contig7_All, CL3106.Contig1_All, CL4588.Contig2_All, CL4597.Contig2_All, CL4903.Contig1_All, CL5394.Contig2_All, Unigene106_All, Unigene11484_All, Unigene12736_All, Unigene15320_All, Unigene15321_All, Unigene15769_All, Unigene16906_All, Unigene17741_All, Unigene20073_All, Unigene2105_All, Unigene3324_All, Unigene4510_All, Unigene4757_All, Unigene5034_All, Unigene5065_All, Unigene5257_All, Unigene6916_All, Unigene7353_All, Unigene7836_All, Unigene8166_All, Unigene8217_All, Unigene8221_All, Unigene833_All, Unigene8662_All, Unigene8718_All, Unigene9038_All                                                                                                                                                                                                                                                                                                                                                                                                                                                                                                                                                                                                                                                                                                                                                                                                                                                                                                                                                                                                                          |
| 163 | <a href="#">Fat digestion and absorption</a> | CL1004.Contig1_All, CL1064.Contig1_All, CL1064.Contig2_All, CL1751.Contig1_All, CL1911.Contig1_All, CL1911.Contig3_All, CL199.Contig1_All, CL2432.Contig2_All, CL2433.Contig10_All, CL2704.Contig1_All, CL2790.Contig2_All, CL2990.Contig1_All, CL2990.Contig2_All, CL344.Contig1_All, CL3541.Contig3_All, CL3541.Contig5_All, CL3897.Contig1_All, CL3897.Contig2_All, CL39.Contig1_All, CL39.Contig2_All, CL39.Contig3_All, CL39.Contig4_All, CL4485.Contig1_All, CL4485.Contig3_All, CL4602.Contig1_All, CL4845.Contig1_All, CL5235.Contig1_All, CL5235.Contig2_All, CL5310.Contig2_All, CL860.Contig10_All, CL860.Contig8_All, CL860.Contig9_All, Unigene10901_All, Unigene11336_All, Unigene12219_All, Unigene12475_All, Unigene13121_All, Unigene13673_All, Unigene17889_All, Unigene184_All, Unigene2699_All, Unigene3029_All, Unigene3033_All, Unigene3034_All, Unigene3036_All, Unigene3037_All, Unigene3042_All, Unigene4060_All, Unigene40_All, Unigene4873_All, Unigene5266_All, Unigene5713_All, Unigene7757_All, Unigene7936_All, Unigene8065_All, Unigene8187_All, Unigene8194_All, Unigene9026_All, Unigene9055_All, Unigene9238_All, Unigene9251_All                                                                                                                                                                                                                                                                                                                                                                                                                                                                                                                                                                   |
| 164 | <a href="#">Pancreatic cancer</a>            | CL1066.Contig1_All, CL1066.Contig2_All, CL1066.Contig3_All, CL1439.Contig1_All, CL1439.Contig2_All, CL1535.Contig3_All, CL1548.Contig2_All, CL1548.Contig3_All, CL1789.Contig1_All, CL1789.Contig2_All, CL2573.Contig2_All, CL2573.Contig3_All, CL271.Contig2_All, CL3373.Contig1_All, CL3373.Contig2_All, CL367.Contig1_All, CL367.Contig2_All, CL367.Contig3_All, CL4271.Contig1_All, CL4439.Contig2_All, CL4787.Contig1_All, CL4896.Contig1_All, CL5115.Contig1_All, CL695.Contig16_All, Unigene10318_All, Unigene12099_All, Unigene12671_All, Unigene1757_All, Unigene2050_All, Unigene220_All, Unigene2374_All, Unigene2749_All, Unigene4671_All, Unigene4801_All, Unigene5789_All, Unigene699_All, Unigene7018_All, Unigene8747_All, Unigene8972_All                                                                                                                                                                                                                                                                                                                                                                                                                                                                                                                                                                                                                                                                                                                                                                                                                                                                                                                                                                             |
| 165 | <a href="#">Propanoate metabolism</a>        | CL1353.Contig1_All, CL1353.Contig3_All, CL2309.Contig2_All, CL2309.Contig3_All, CL2694.Contig1_All, CL2694.Contig3_All, CL3832.Contig1_All, CL3963.Contig1_All, CL4144.Contig3_All, CL4144.Contig4_All, CL4451.Contig1_All, CL4451.Contig2_All, CL4570.Contig1_All, CL4646.Contig2_All, CL4753.Contig1_All, Unigene10157_All, Unigene10158_All, Unigene10282_All, Unigene10287_All, Unigene10299_All, Unigene10311_All, Unigene10526_All, Unigene10599_All, Unigene10686_All, Unigene10908_All, Unigene11003_All, Unigene11854_All, Unigene11887_All, Unigene1197_All, Unigene12140_All, Unigene12169_All, Unigene12187_All, Unigene12219_All, Unigene12293_All, Unigene12412_All, Unigene12643_All, Unigene13080_All, Unigene13152_All, Unigene13410_All, Unigene13431_All, Unigene13445_All, Unigene13673_All, Unigene13773_All, Unigene14111_All, Unigene15270_All, Unigene15429_All, Unigene16206_All, Unigene16942_All, Unigene17527_All, Unigene18101_All, Unigene186_All, Unigene19038_All, Unigene19153_All, Unigene19366_All, Unigene20691_All, Unigene2853_All, Unigene3282_All, Unigene3450_All, Unigene5053_All, Unigene6360_All, Unigene7886_All, Unigene8037_All                                                                                                                                                                                                                                                                                                                                                                                                                                                                                                                                                         |



|     |                                                         |                                                                                                                                                                                                                                                                                                                                                                                                                                                                                                                                                                                                                                                                                                                                                                                                                                                                                                                                                                                                                                                                                                                                                                                                                                                                                                                                                                                                                                                                                                                                                                                                                                                                                                                     |
|-----|---------------------------------------------------------|---------------------------------------------------------------------------------------------------------------------------------------------------------------------------------------------------------------------------------------------------------------------------------------------------------------------------------------------------------------------------------------------------------------------------------------------------------------------------------------------------------------------------------------------------------------------------------------------------------------------------------------------------------------------------------------------------------------------------------------------------------------------------------------------------------------------------------------------------------------------------------------------------------------------------------------------------------------------------------------------------------------------------------------------------------------------------------------------------------------------------------------------------------------------------------------------------------------------------------------------------------------------------------------------------------------------------------------------------------------------------------------------------------------------------------------------------------------------------------------------------------------------------------------------------------------------------------------------------------------------------------------------------------------------------------------------------------------------|
| 166 | <a href="#">Carbohydrate digestion and absorption</a>   | CL1066.Contig1_All, CL1066.Contig2_All, CL1066.Contig3_All, CL2137.Contig1_All, CL2137.Contig2_All, CL2182.Contig1_All, CL2182.Contig3_All, CL2182.Contig4_All, CL2474.Contig2_All, CL2930.Contig5_All, CL367.Contig1_All, CL367.Contig2_All, CL367.Contig3_All, CL3776.Contig2_All, CL39.Contig1_All, CL39.Contig2_All, CL39.Contig3_All, CL39.Contig4_All, CL41.Contig3_All, CL41.Contig4_All, CL41.Contig8_All, CL493.Contig2_All, CL5115.Contig3_All, CL5391.Contig1_All, CL5391.Contig2_All, CL695.Contig16_All, CL940.Contig3_All, CL940.Contig5_All, Unigene10594_All, Unigene11480_All, Unigene11482_All, Unigene11483_All, Unigene12660_All, Unigene17323_All, Unigene17324_All, Unigene18652_All, Unigene18898_All, Unigene20899_All, Unigene2209_All, Unigene2749_All, Unigene3010_All, Unigene4053_All, Unigene4070_All, Unigene4323_All, Unigene5047_All, Unigene5724_All, Unigene6215_All, Unigene695_All, Unigene7206_All, Unigene8422_All, Unigene8621_All                                                                                                                                                                                                                                                                                                                                                                                                                                                                                                                                                                                                                                                                                                                                          |
| 167 | <a href="#">Insect hormone biosynthesis</a>             | CL5125.Contig1_All, CL887.Contig1_All, Unigene11671_All, Unigene17598_All                                                                                                                                                                                                                                                                                                                                                                                                                                                                                                                                                                                                                                                                                                                                                                                                                                                                                                                                                                                                                                                                                                                                                                                                                                                                                                                                                                                                                                                                                                                                                                                                                                           |
| 168 | <a href="#">PPAR signaling pathway</a>                  | CL102.Contig1_All, CL102.Contig2_All, CL1091.Contig14_All, CL1353.Contig1_All, CL1353.Contig3_All, CL1387.Contig1_All, CL1387.Contig3_All, CL1751.Contig1_All, CL1795.Contig5_All, CL1911.Contig1_All, CL1911.Contig3_All, CL1939.Contig1_All, CL205.Contig1_All, CL205.Contig2_All, CL2430.Contig3_All, CL257.Contig5_All, CL2808.Contig1_All, CL2943.Contig1_All, CL2943.Contig2_All, CL2990.Contig1_All, CL2990.Contig2_All, CL35.Contig11_All, CL35.Contig1_All, CL35.Contig7_All, CL3536.Contig1_All, CL3536.Contig2_All, CL3536.Contig5_All, CL4427.Contig2_All, CL4427.Contig3_All, CL4646.Contig2_All, CL4813.Contig1_All, CL4813.Contig2_All, CL4813.Contig3_All, CL507.Contig7_All, CL5204.Contig1_All, CL5204.Contig2_All, CL5212.Contig1_All, CL5212.Contig2_All, CL5264.Contig2_All, CL63.Contig10_All, CL63.Contig9_All, CL866.Contig1_All, CL866.Contig2_All, CL880.Contig3_All, Unigene10001_All, Unigene10029_All, Unigene10157_All, Unigene10158_All, Unigene10311_All, Unigene10866_All, Unigene10867_All, Unigene10896_All, Unigene10924_All, Unigene11164_All, Unigene11394_All, Unigene11645_All, Unigene11772_All, Unigene11815_All, Unigene11839_All, Unigene11862_All, Unigene11955_All, Unigene11960_All, Unigene11969_All, Unigene11975_All, Unigene11997_All, Unigene12021_All, Unigene13271_All, Unigene16671_All, Unigene16926_All, Unigene17202_All, Unigene1819_All, Unigene19070_All, Unigene19332_All, Unigene19739_All, Unigene20727_All, Unigene2742_All, Unigene350_All, Unigene40_All, Unigene693_All, Unigene7046_All, Unigene761_All, Unigene818_All, Unigene8860_All, Unigene9028_All, Unigene9154_All, Unigene9238_All, Unigene9634_All, Unigene9714_All, Unigene9974_All |
| 169 | <a href="#">Riboflavin metabolism</a>                   | CL1124.Contig1_All, CL1388.Contig1_All, CL161.Contig4_All, CL1685.Contig2_All, CL252.Contig2_All, CL252.Contig3_All, CL3156.Contig1_All, CL4346.Contig1_All, CL4393.Contig1_All, CL4393.Contig2_All, CL4605.Contig1_All, CL4605.Contig2_All, Unigene10226_All, Unigene10747_All, Unigene10994_All, Unigene16438_All, Unigene20289_All, Unigene2915_All, Unigene3159_All, Unigene4148_All, Unigene4637_All, Unigene5774_All, Unigene6162_All, Unigene8213_All, Unigene9034_All                                                                                                                                                                                                                                                                                                                                                                                                                                                                                                                                                                                                                                                                                                                                                                                                                                                                                                                                                                                                                                                                                                                                                                                                                                       |
| 170 | <a href="#">Cytosolic DNA-sensing pathway</a>           | CL1411.Contig1_All, CL1411.Contig8_All, CL1683.Contig2_All, CL1683.Contig7_All, CL2306.Contig2_All, CL322.Contig4_All, CL322.Contig5_All, CL322.Contig6_All, CL3251.Contig1_All, CL3251.Contig2_All, CL3635.Contig3_All, CL3657.Contig3_All, CL3792.Contig3_All, CL5004.Contig1_All, CL5051.Contig2_All, CL5461.Contig2_All, Unigene11623_All, Unigene1205_All, Unigene12060_All, Unigene12096_All, Unigene12479_All, Unigene1247_All, Unigene13002_All, Unigene1757_All, Unigene18801_All, Unigene19657_All, Unigene2131_All, Unigene24_All, Unigene3081_All, Unigene3288_All, Unigene3390_All, Unigene33_All, Unigene3659_All, Unigene7192_All, Unigene7296_All, Unigene7750_All, Unigene7993_All, Unigene8008_All, Unigene8228_All, Unigene8236_All, Unigene9107_All, Unigene9758_All                                                                                                                                                                                                                                                                                                                                                                                                                                                                                                                                                                                                                                                                                                                                                                                                                                                                                                                            |
| 171 | <a href="#">Mineral absorption</a>                      | CL1212.Contig1_All, CL1540.Contig1_All, CL1591.Contig2_All, CL1880.Contig1_All, CL1880.Contig2_All, CL1880.Contig3_All, CL190.Contig1_All, CL2137.Contig1_All, CL2137.Contig2_All, CL2474.Contig2_All, CL2709.Contig1_All, CL2709.Contig2_All, CL2711.Contig1_All, CL2711.Contig2_All, CL3160.Contig2_All, CL3776.Contig2_All, CL4084.Contig1_All, CL4084.Contig2_All, CL41.Contig3_All, CL41.Contig4_All, CL41.Contig8_All, CL4450.Contig2_All, CL5115.Contig3_All, CL531.Contig1_All, CL5440.Contig1_All, CL573.Contig6_All, CL703.Contig2_All, CL703.Contig3_All, CL703.Contig5_All, CL703.Contig6_All, CL878.Contig1_All, CL878.Contig2_All, CL878.Contig3_All, CL878.Contig4_All, CL878.Contig5_All, Unigene10594_All, Unigene11480_All, Unigene11482_All, Unigene11483_All, Unigene11804_All, Unigene11824_All, Unigene11897_All, Unigene12077_All, Unigene12254_All, Unigene12427_All, Unigene12594_All, Unigene12749_All, Unigene16321_All, Unigene16575_All, Unigene19085_All, Unigene19677_All, Unigene2079_All, Unigene20899_All, Unigene2101_All, Unigene2274_All, Unigene2763_All, Unigene3010_All, Unigene3177_All, Unigene4163_All, Unigene4323_All, Unigene5047_All, Unigene5724_All, Unigene6215_All, Unigene62_All, Unigene6597_All, Unigene6809_All, Unigene7075_All, Unigene7206_All, Unigene808_All, Unigene8700_All, Unigene9163_All                                                                                                                                                                                                                                                                                                                                                          |
| 172 | <a href="#">Chronic myeloid leukemia</a>                | CL1066.Contig1_All, CL1066.Contig2_All, CL1066.Contig3_All, CL1439.Contig1_All, CL1439.Contig2_All, CL1807.Contig1_All, CL1807.Contig2_All, CL1874.Contig2_All, CL1953.Contig1_All, CL2038.Contig1_All, CL2038.Contig7_All, CL2222.Contig9_All, CL2287.Contig2_All, CL2287.Contig4_All, CL2346.Contig2_All, CL3373.Contig1_All, CL3373.Contig2_All, CL3632.Contig2_All, CL3632.Contig3_All, CL367.Contig1_All, CL367.Contig2_All, CL367.Contig3_All, CL4271.Contig1_All, CL4439.Contig2_All, CL4559.Contig2_All, CL4559.Contig3_All, CL4787.Contig1_All, CL695.Contig16_All, Unigene1000_All, Unigene10174_All, Unigene12099_All, Unigene12671_All, Unigene13036_All, Unigene1663_All, Unigene1757_All, Unigene198_All, Unigene2050_All, Unigene2374_All, Unigene2749_All, Unigene3168_All, Unigene4084_All, Unigene4142_All, Unigene4801_All, Unigene5179_All, Unigene6222_All, Unigene7016_All, Unigene7983_All, Unigene8046_All, Unigene8747_All, Unigene8972_All, Unigene9641_All                                                                                                                                                                                                                                                                                                                                                                                                                                                                                                                                                                                                                                                                                                                               |
| 173 | <a href="#">Biosynthesis of unsaturated fatty acids</a> | CL1353.Contig1_All, CL1353.Contig3_All, CL1939.Contig1_All, CL3963.Contig1_All, CL4646.Contig2_All, CL5264.Contig2_All, CL63.Contig10_All, CL63.Contig9_All, Unigene10157_All, Unigene10158_All, Unigene10311_All, Unigene10693_All, Unigene10866_All, Unigene10867_All, Unigene10890_All, Unigene11394_All, Unigene11808_All, Unigene11839_All, Unigene11842_All, Unigene11862_All, Unigene11975_All, Unigene12108_All, Unigene12123_All, Unigene12578_All, Unigene13152_All, Unigene13211_All, Unigene15429_All, Unigene19070_All, Unigene4011_All, Unigene4845_All, Unigene4858_All, Unigene5230_All, Unigene6980_All, Unigene9927_All                                                                                                                                                                                                                                                                                                                                                                                                                                                                                                                                                                                                                                                                                                                                                                                                                                                                                                                                                                                                                                                                           |

|     |                                                                            |                                                                                                                                                                                                                                                                                                                                                                                                                                                                                                                                                                                                                                                                                                                                                                                                                                                                                                                                                                                                                                                                                                                                                                                                                                                                                                                                                                                                                                                                                                                                                                                                                                                                                                                                                                                                                                                                                                                                                                                                                                                                                                                                                                                                                                                                                                                                                                                                                                                                                              |
|-----|----------------------------------------------------------------------------|----------------------------------------------------------------------------------------------------------------------------------------------------------------------------------------------------------------------------------------------------------------------------------------------------------------------------------------------------------------------------------------------------------------------------------------------------------------------------------------------------------------------------------------------------------------------------------------------------------------------------------------------------------------------------------------------------------------------------------------------------------------------------------------------------------------------------------------------------------------------------------------------------------------------------------------------------------------------------------------------------------------------------------------------------------------------------------------------------------------------------------------------------------------------------------------------------------------------------------------------------------------------------------------------------------------------------------------------------------------------------------------------------------------------------------------------------------------------------------------------------------------------------------------------------------------------------------------------------------------------------------------------------------------------------------------------------------------------------------------------------------------------------------------------------------------------------------------------------------------------------------------------------------------------------------------------------------------------------------------------------------------------------------------------------------------------------------------------------------------------------------------------------------------------------------------------------------------------------------------------------------------------------------------------------------------------------------------------------------------------------------------------------------------------------------------------------------------------------------------------|
| 174 | <a href="#">TGF-beta signaling pathway</a>                                 | CL1439.Contig1_All, CL1439.Contig2_All, CL2170.Contig2_All, CL2170.Contig5_All, CL2224.Contig2_All, CL2224.Contig3_All, CL2224.Contig4_All, CL2235.Contig1_All, CL2235.Contig2_All, CL2537.Contig1_All, CL2684.Contig1_All, CL2684.Contig2_All, CL3183.Contig2_All, CL3222.Contig2_All, CL3786.Contig6_All, CL3823.Contig1_All, CL3823.Contig2_All, CL4271.Contig1_All, CL4271.Contig2_All, CL4496.Contig3_All, CL4514.Contig2_All, CL5106.Contig1_All, CL915.Contig3_All, CL915.Contig5_All, Unigene10242_All, Unigene10876_All, Unigene11040_All, Unigene11307_All, Unigene11411_All, Unigene12740_All, Unigene12903_All, Unigene13432_All, Unigene1767_All, Unigene18644_All, Unigene2050_All, Unigene2956_All, Unigene3216_All, Unigene4144_All, Unigene4801_All, Unigene4975_All, Unigene5493_All, Unigene54_All, Unigene5781_All, Unigene5808_All, Unigene7063_All, Unigene7671_All, Unigene7745_All, Unigene8972_All, Unigene9050_All, Unigene9172_All, Unigene9877_All                                                                                                                                                                                                                                                                                                                                                                                                                                                                                                                                                                                                                                                                                                                                                                                                                                                                                                                                                                                                                                                                                                                                                                                                                                                                                                                                                                                                                                                                                                               |
| 175 | <a href="#">Primary bile acid biosynthesis</a>                             | CL1300.Contig4_All, CL1300.Contig6_All, CL1842.Contig1_All, CL1842.Contig3_All, CL257.Contig5_All, CL3212.Contig1_All, CL3991.Contig1_All, CL4171.Contig1_All, CL4427.Contig2_All, CL4427.Contig3_All, CL4700.Contig1_All, Unigene10250_All, Unigene11969_All, Unigene12910_All, Unigene13271_All, Unigene666_All, Unigene9724_All                                                                                                                                                                                                                                                                                                                                                                                                                                                                                                                                                                                                                                                                                                                                                                                                                                                                                                                                                                                                                                                                                                                                                                                                                                                                                                                                                                                                                                                                                                                                                                                                                                                                                                                                                                                                                                                                                                                                                                                                                                                                                                                                                           |
| 176 | <a href="#">T cell receptor signaling pathway</a>                          | CL1066.Contig1_All, CL1066.Contig2_All, CL1066.Contig3_All, CL1807.Contig1_All, CL1807.Contig2_All, CL1831.Contig1_All, CL1831.Contig2_All, CL1843.Contig3_All, CL188.Contig16_All, CL1953.Contig1_All, CL1954.Contig1_All, CL1954.Contig2_All, CL257.Contig1_All, CL257.Contig2_All, CL271.Contig2_All, CL2722.Contig1_All, CL2977.Contig1_All, CL2977.Contig2_All, CL3047.Contig1_All, CL3047.Contig2_All, CL367.Contig1_All, CL367.Contig2_All, CL367.Contig3_All, CL3979.Contig1_All, CL3979.Contig2_All, CL4190.Contig1_All, CL4439.Contig2_All, CL4521.Contig1_All, CL4521.Contig2_All, CL4521.Contig3_All, CL4521.Contig5_All, CL4736.Contig1_All, CL4736.Contig2_All, CL4787.Contig1_All, CL4815.Contig1_All, CL4815.Contig2_All, CL4855.Contig1_All, CL4855.Contig2_All, CL4966.Contig1_All, CL5005.Contig1_All, CL5005.Contig2_All, CL5064.Contig2_All, CL5115.Contig1_All, CL5469.Contig2_All, CL695.Contig16_All, Unigene10174_All, Unigene11307_All, Unigene11922_All, Unigene12099_All, Unigene12671_All, Unigene13853_All, Unigene1479_All, Unigene15257_All, Unigene1757_All, Unigene220_All, Unigene236_All, Unigene2374_All, Unigene247_All, Unigene2749_All, Unigene3131_All, Unigene4081_All, Unigene5808_All, Unigene7297_All, Unigene8046_All, Unigene8056_All, Unigene8725_All, Unigene8784_All, Unigene9050_All, Unigene9719_All, Unigene9877_All                                                                                                                                                                                                                                                                                                                                                                                                                                                                                                                                                                                                                                                                                                                                                                                                                                                                                                                                                                                                                                                                                                                    |
| 177 | <a href="#">Ubiquitin mediated proteolysis</a>                             | CL1080.Contig2_All, CL1124.Contig1_All, CL1612.Contig1_All, CL1612.Contig2_All, CL1660.Contig10_All, CL1660.Contig15_All, CL1660.Contig16_All, CL1660.Contig1_All, CL1660.Contig3_All, CL1660.Contig5_All, CL1660.Contig6_All, CL1660.Contig7_All, CL1660.Contig8_All, CL1660.Contig9_All, CL1953.Contig1_All, CL2.Contig1_All, CL2068.Contig5_All, CL2159.Contig2_All, CL2217.Contig1_All, CL2217.Contig2_All, CL2217.Contig3_All, CL2416.Contig1_All, CL2716.Contig2_All, CL2749.Contig2_All, CL2793.Contig1_All, CL2793.Contig2_All, CL2809.Contig2_All, CL2809.Contig3_All, CL2809.Contig8_All, CL2838.Contig1_All, CL2838.Contig2_All, CL2838.Contig4_All, CL2869.Contig3_All, CL2978.Contig2_All, CL2978.Contig3_All, CL2986.Contig1_All, CL2986.Contig2_All, CL3153.Contig1_All, CL3153.Contig2_All, CL3162.Contig2_All, CL3517.Contig1_All, CL3713.Contig1_All, CL4162.Contig1_All, CL4162.Contig2_All, CL4203.Contig1_All, CL4366.Contig1_All, CL4511.Contig1_All, CL4514.Contig2_All, CL4558.Contig1_All, CL4558.Contig2_All, CL4558.Contig3_All, CL4615.Contig2_All, CL4738.Contig1_All, CL4757.Contig2_All, CL4804.Contig1_All, CL5064.Contig2_All, CL5218.Contig1_All, CL5218.Contig2_All, CL5264.Contig2_All, CL5304.Contig1_All, CL570.Contig1_All, CL570.Contig2_All, CL862.Contig1_All, CL862.Contig2_All, CL862.Contig3_All, CL862.Contig4_All, CL987.Contig2_All, Unigene10019_All, Unigene100_All, Unigene1022_All, Unigene1038_All, Unigene1056_All, Unigene1061_All, Unigene10876_All, Unigene11040_All, Unigene11227_All, Unigene11228_All, Unigene1125_All, Unigene11411_All, Unigene1176_All, Unigene1181_All, Unigene11828_All, Unigene11839_All, Unigene11877_All, Unigene118_All, Unigene11944_All, Unigene11957_All, Unigene11975_All, Unigene12157_All, Unigene1229_All, Unigene12363_All, Unigene12740_All, Unigene12868_All, Unigene12903_All, Unigene1322_All, Unigene13588_All, Unigene16349_All, Unigene1769_All, Unigene17863_All, Unigene18584_All, Unigene18752_All, Unigene20083_All, Unigene20226_All, Unigene2069_All, Unigene3791_All, Unigene47_All, Unigene4975_All, Unigene5037_All, Unigene5897_All, Unigene6020_All, Unigene6856_All, Unigene6931_All, Unigene7044_All, Unigene7070_All, Unigene7088_All, Unigene7120_All, Unigene7220_All, Unigene754_All, Unigene756_All, Unigene7671_All, Unigene7747_All, Unigene7780_All, Unigene798_All, Unigene806_All, Unigene8277_All, Unigene83_All, Unigene8710_All, Unigene8_All, Unigene9115_All |
| 178 | <a href="#">Thyroid cancer</a>                                             | CL1091.Contig14_All, CL1637.Contig1_All, CL3235.Contig1_All, CL3235.Contig2_All, CL3270.Contig1_All, CL3270.Contig2_All, CL349.Contig12_All, CL349.Contig3_All, CL349.Contig5_All, CL4381.Contig1_All, CL4439.Contig2_All, CL4787.Contig1_All, CL5204.Contig1_All, CL5204.Contig2_All, CL880.Contig3_All, Unigene1150_All, Unigene11923_All, Unigene12671_All, Unigene1699_All, Unigene17718_All, Unigene4137_All, Unigene4161_All, Unigene5068_All, Unigene5727_All, Unigene7287_All, Unigene777_All, Unigene783_All, Unigene8003_All, Unigene8747_All, Unigene9039_All, Unigene9740_All                                                                                                                                                                                                                                                                                                                                                                                                                                                                                                                                                                                                                                                                                                                                                                                                                                                                                                                                                                                                                                                                                                                                                                                                                                                                                                                                                                                                                                                                                                                                                                                                                                                                                                                                                                                                                                                                                                    |
| 179 | <a href="#">Epithelial cell signaling in Helicobacter pylori infection</a> | CL1535.Contig3_All, CL1548.Contig2_All, CL1548.Contig3_All, CL1966.Contig2_All, CL2150.Contig3_All, CL2222.Contig9_All, CL2634.Contig1_All, CL2634.Contig2_All, CL2658.Contig1_All, CL2658.Contig2_All, CL271.Contig2_All, CL3091.Contig1_All, CL3091.Contig2_All, CL3091.Contig3_All, CL3091.Contig4_All, CL3657.Contig1_All, CL3884.Contig2_All, CL3979.Contig1_All, CL3979.Contig2_All, CL4090.Contig2_All, CL4381.Contig1_All, CL4459.Contig1_All, CL4628.Contig1_All, CL4736.Contig1_All, CL4736.Contig2_All, CL4966.Contig1_All, CL5115.Contig1_All, CL5469.Contig2_All, CL823.Contig1_All, Unigene10026_All, Unigene10483_All, Unigene11240_All, Unigene11899_All, Unigene1189_All, Unigene12028_All, Unigene12168_All, Unigene12209_All, Unigene12302_All, Unigene12423_All, Unigene12923_All, Unigene13508_All, Unigene13589_All, Unigene1479_All, Unigene15969_All, Unigene1667_All, Unigene1679_All, Unigene1741_All, Unigene1757_All, Unigene17602_All, Unigene18707_All, Unigene220_All, Unigene3351_All, Unigene3730_All, Unigene4133_All, Unigene6920_All, Unigene6977_All, Unigene699_All, Unigene8107_All, Unigene925_All, Unigene9719_All                                                                                                                                                                                                                                                                                                                                                                                                                                                                                                                                                                                                                                                                                                                                                                                                                                                                                                                                                                                                                                                                                                                                                                                                                                                                                                                                  |

|     |                                                           |                                                                                                                                                                                                                                                                                                                                                                                                                                                                                                                                                                                                                                                                                                                                                                                                                                                                                                                                                                                                                                                                                                                                                                                                                                                                                                                                                                                                                   |
|-----|-----------------------------------------------------------|-------------------------------------------------------------------------------------------------------------------------------------------------------------------------------------------------------------------------------------------------------------------------------------------------------------------------------------------------------------------------------------------------------------------------------------------------------------------------------------------------------------------------------------------------------------------------------------------------------------------------------------------------------------------------------------------------------------------------------------------------------------------------------------------------------------------------------------------------------------------------------------------------------------------------------------------------------------------------------------------------------------------------------------------------------------------------------------------------------------------------------------------------------------------------------------------------------------------------------------------------------------------------------------------------------------------------------------------------------------------------------------------------------------------|
| 180 | <a href="#">Protein export</a>                            | CL2403.Contig1_All, CL3742.Contig1_All, CL4338.Contig1_All, CL4338.Contig2_All, CL4338.Contig3_All, CL4666.Contig1_All, CL4666.Contig2_All, CL5034.Contig1_All, CL5034.Contig2_All, CL5225.Contig1_All, CL678.Contig17_All, Unigene10374_All, Unigene10433_All, Unigene11884_All, Unigene11908_All, Unigene11988_All, Unigene12204_All, Unigene12457_All, Unigene12460_All, Unigene12709_All, Unigene12890_All, Unigene12920_All, Unigene13331_All, Unigene13352_All, Unigene7723_All, Unigene8950_All                                                                                                                                                                                                                                                                                                                                                                                                                                                                                                                                                                                                                                                                                                                                                                                                                                                                                                            |
| 181 | <a href="#">Aldosterone-regulated sodium reabsorption</a> | CL1009.Contig1_All, CL1066.Contig1_All, CL1066.Contig2_All, CL1066.Contig3_All, CL1730.Contig2_All, CL2137.Contig1_All, CL2137.Contig2_All, CL2182.Contig1_All, CL2182.Contig3_All, CL2182.Contig4_All, CL241.Contig1_All, CL241.Contig7_All, CL2474.Contig2_All, CL2505.Contig3_All, CL2505.Contig4_All, CL367.Contig1_All, CL367.Contig2_All, CL367.Contig3_All, CL3776.Contig2_All, CL39.Contig1_All, CL39.Contig2_All, CL39.Contig3_All, CL39.Contig4_All, CL4085.Contig1_All, CL4085.Contig2_All, CL41.Contig3_All, CL41.Contig4_All, CL41.Contig8_All, CL4119.Contig1_All, CL4316.Contig1_All, CL4439.Contig2_All, CL5280.Contig1_All, CL5391.Contig1_All, CL5391.Contig2_All, CL695.Contig16_All, CL940.Contig3_All, CL940.Contig5_All, CL95.Contig1_All, CL95.Contig2_All, Unigene10594_All, Unigene11480_All, Unigene11482_All, Unigene11483_All, Unigene124_All, Unigene12671_All, Unigene16125_All, Unigene18035_All, Unigene18898_All, Unigene19476_All, Unigene19524_All, Unigene207_All, Unigene2742_All, Unigene3010_All, Unigene3836_All, Unigene4323_All, Unigene4950_All, Unigene49_All, Unigene5724_All, Unigene6151_All, Unigene6215_All, Unigene699_All, Unigene7206_All, Unigene7322_All, Unigene8081_All, Unigene8114_All                                                                                                                                                                  |
| 182 | <a href="#">beta-Alanine metabolism</a>                   | CL1156.Contig3_All, CL1353.Contig1_All, CL1353.Contig3_All, CL1599.Contig1_All, CL1599.Contig2_All, CL2309.Contig2_All, CL2309.Contig3_All, CL2694.Contig1_All, CL2694.Contig3_All, CL313.Contig2_All, CL3963.Contig1_All, CL4144.Contig3_All, CL4144.Contig7_All, CL4451.Contig1_All, CL4451.Contig2_All, CL4646.Contig2_All, CL4753.Contig1_All, Unigene10157_All, Unigene10158_All, Unigene10282_All, Unigene10299_All, Unigene10311_All, Unigene10526_All, Unigene10686_All, Unigene10908_All, Unigene11003_All, Unigene11026_All, Unigene11027_All, Unigene11887_All, Unigene1197_All, Unigene12187_All, Unigene12412_All, Unigene13152_All, Unigene13410_All, Unigene13445_All, Unigene13773_All, Unigene15270_All, Unigene15429_All, Unigene16206_All, Unigene17527_All, Unigene18101_All, Unigene186_All, Unigene19038_All, Unigene2853_All, Unigene3450_All, Unigene5053_All, Unigene6360_All                                                                                                                                                                                                                                                                                                                                                                                                                                                                                                            |
| 183 | <a href="#">Glutathione metabolism</a>                    | CL1175.Contig1_All, CL1175.Contig2_All, CL143.Contig1_All, CL143.Contig2_All, CL1584.Contig2_All, CL16.Contig10_All, CL2411.Contig1_All, CL2445.Contig1_All, CL2456.Contig3_All, CL2512.Contig2_All, CL300.Contig7_All, CL3078.Contig1_All, CL317.Contig2_All, CL3618.Contig1_All, CL372.Contig1_All, CL3784.Contig1_All, CL3788.Contig1_All, CL4091.Contig1_All, CL4091.Contig2_All, CL4453.Contig1_All, CL450.Contig10_All, CL4903.Contig1_All, CL4969.Contig1_All, Unigene10381_All, Unigene10418_All, Unigene106_All, Unigene10735_All, Unigene10887_All, Unigene11286_All, Unigene11484_All, Unigene11916_All, Unigene11949_All, Unigene12008_All, Unigene12143_All, Unigene12227_All, Unigene12281_All, Unigene12325_All, Unigene12530_All, Unigene12565_All, Unigene12818_All, Unigene13093_All, Unigene1385_All, Unigene1464_All, Unigene15435_All, Unigene15451_All, Unigene1694_All, Unigene17741_All, Unigene18651_All, Unigene19310_All, Unigene2156_All, Unigene2914_All, Unigene3689_All, Unigene3936_All, Unigene4869_All, Unigene5034_All, Unigene5834_All, Unigene5870_All, Unigene6056_All, Unigene6708_All, Unigene7200_All, Unigene7258_All, Unigene7548_All, Unigene7814_All, Unigene8166_All, Unigene8718_All, Unigene8997_All, Unigene9038_All, Unigene908_All, Unigene9298_All, Unigene9637_All                                                                                           |
| 184 | <a href="#">VEGF signaling pathway</a>                    | CL1066.Contig1_All, CL1066.Contig2_All, CL1066.Contig3_All, CL1535.Contig3_All, CL1831.Contig1_All, CL1831.Contig2_All, CL1874.Contig2_All, CL199.Contig1_All, CL2066.Contig1_All, CL2182.Contig1_All, CL2182.Contig3_All, CL2182.Contig4_All, CL2432.Contig2_All, CL271.Contig2_All, CL3116.Contig2_All, CL3290.Contig2_All, CL3290.Contig3_All, CL367.Contig1_All, CL367.Contig2_All, CL367.Contig3_All, CL3673.Contig2_All, CL39.Contig1_All, CL39.Contig2_All, CL39.Contig3_All, CL39.Contig4_All, CL3979.Contig1_All, CL3979.Contig2_All, CL4190.Contig1_All, CL4439.Contig2_All, CL4521.Contig1_All, CL4521.Contig2_All, CL4521.Contig3_All, CL4521.Contig5_All, CL4559.Contig2_All, CL4559.Contig3_All, CL4787.Contig1_All, CL4966.Contig1_All, CL5064.Contig2_All, CL5310.Contig2_All, CL5391.Contig1_All, CL5391.Contig2_All, CL695.Contig16_All, CL748.Contig1_All, CL748.Contig3_All, CL821.Contig1_All, CL821.Contig2_All, CL860.Contig10_All, CL860.Contig8_All, CL860.Contig9_All, CL940.Contig3_All, CL940.Contig5_All, Unigene11222_All, Unigene11810_All, Unigene12484_All, Unigene12671_All, Unigene13853_All, Unigene1855_All, Unigene18898_All, Unigene19601_All, Unigene2749_All, Unigene3029_All, Unigene3033_All, Unigene3034_All, Unigene3036_All, Unigene3037_All, Unigene3042_All, Unigene3088_All, Unigene4359_All, Unigene5813_All, Unigene7016_All, Unigene7547_All, Unigene9379_All |
| 185 | <a href="#">Toll-like receptor signaling pathway</a>      | CL1066.Contig1_All, CL1066.Contig2_All, CL1066.Contig3_All, CL1535.Contig3_All, CL1966.Contig2_All, CL2049.Contig1_All, CL2049.Contig3_All, CL2129.Contig4_All, CL2789.Contig2_All, CL367.Contig1_All, CL367.Contig2_All, CL367.Contig3_All, CL4057.Contig1_All, CL4320.Contig3_All, CL4736.Contig1_All, CL4736.Contig2_All, CL4787.Contig1_All, CL4815.Contig1_All, CL4815.Contig2_All, CL4966.Contig1_All, CL504.Contig1_All, CL504.Contig2_All, CL5115.Contig1_All, CL695.Contig16_All, Unigene10296_All, Unigene12139_All, Unigene1326_All, Unigene1479_All, Unigene17046_All, Unigene1757_All, Unigene18114_All, Unigene20095_All, Unigene220_All, Unigene2749_All, Unigene3131_All, Unigene3982_All, Unigene6977_All, Unigene7286_All, Unigene8246_All                                                                                                                                                                                                                                                                                                                                                                                                                                                                                                                                                                                                                                                      |
| 186 | <a href="#">Mucin type O-Glycan biosynthesis</a>          | CL3006.Contig2_All, CL3756.Contig1_All, CL3756.Contig2_All, CL3945.Contig4_All, CL3945.Contig6_All, CL3945.Contig8_All, CL5085.Contig2_All, Unigene1579_All, Unigene17052_All, Unigene3174_All, Unigene5073_All, Unigene6714_All, Unigene7057_All, Unigene7650_All, Unigene8723_All                                                                                                                                                                                                                                                                                                                                                                                                                                                                                                                                                                                                                                                                                                                                                                                                                                                                                                                                                                                                                                                                                                                               |
| 187 | <a href="#">Non-homologous end-joining</a>                | CL2300.Contig1_All, CL4777.Contig1_All, Unigene3089_All, Unigene35_All, Unigene383_All, Unigene4925_All                                                                                                                                                                                                                                                                                                                                                                                                                                                                                                                                                                                                                                                                                                                                                                                                                                                                                                                                                                                                                                                                                                                                                                                                                                                                                                           |
| 188 | <a href="#">Bladder cancer</a>                            | CL1170.Contig1_All, CL1548.Contig2_All, CL1548.Contig3_All, CL1695.Contig8_All, CL2935.Contig1_All, CL2935.Contig3_All, CL3373.Contig1_All, CL3373.Contig2_All, CL3802.Contig2_All, CL4439.Contig2_All, CL4787.Contig1_All, Unigene12099_All, Unigene12671_All, Unigene1757_All, Unigene2374_All, Unigene699_All, Unigene8747_All, Unigene9028_All, Unigene9740_All                                                                                                                                                                                                                                                                                                                                                                                                                                                                                                                                                                                                                                                                                                                                                                                                                                                                                                                                                                                                                                               |

|     |                                                 |                                                                                                                                                                                                                                                                                                                                                                                                                                                                                                                                                                                                                                                                                                                                                                                                                                                                                                                                                                                                                                                                                                                                                                                                                                                                                                                                                                                                                                                                                                                                                                                                                                                                                                                                          |
|-----|-------------------------------------------------|------------------------------------------------------------------------------------------------------------------------------------------------------------------------------------------------------------------------------------------------------------------------------------------------------------------------------------------------------------------------------------------------------------------------------------------------------------------------------------------------------------------------------------------------------------------------------------------------------------------------------------------------------------------------------------------------------------------------------------------------------------------------------------------------------------------------------------------------------------------------------------------------------------------------------------------------------------------------------------------------------------------------------------------------------------------------------------------------------------------------------------------------------------------------------------------------------------------------------------------------------------------------------------------------------------------------------------------------------------------------------------------------------------------------------------------------------------------------------------------------------------------------------------------------------------------------------------------------------------------------------------------------------------------------------------------------------------------------------------------|
| 189 | <a href="#">Terpenoid backbone biosynthesis</a> | CL2246.Contig3_All, CL2246.Contig6_All, CL2246.Contig8_All, CL4773.Contig1_All, CL4773.Contig2_All, Unigene10488_All, Unigene12219_All, Unigene12374_All, Unigene12646_All, Unigene13129_All, Unigene13673_All, Unigene5207_All, Unigene765_All, Unigene8174_All, Unigene9634_All                                                                                                                                                                                                                                                                                                                                                                                                                                                                                                                                                                                                                                                                                                                                                                                                                                                                                                                                                                                                                                                                                                                                                                                                                                                                                                                                                                                                                                                        |
| 190 | <a href="#">Sulfur metabolism</a>               | CL57.Contig2_All, Unigene12541_All, Unigene12560_All, Unigene12760_All, Unigene12843_All, Unigene4739_All, Unigene5758_All, Unigene6831_All, Unigene6996_All, Unigene6997_All, Unigene7000_All                                                                                                                                                                                                                                                                                                                                                                                                                                                                                                                                                                                                                                                                                                                                                                                                                                                                                                                                                                                                                                                                                                                                                                                                                                                                                                                                                                                                                                                                                                                                           |
| 191 | <a href="#">Fatty acid elongation</a>           | CL3963.Contig1_All, CL4673.Contig1_All, CL4673.Contig2_All, CL4673.Contig4_All, Unigene10475_All, Unigene10476_All, Unigene10693_All, Unigene10890_All, Unigene11230_All, Unigene11231_All, Unigene11232_All, Unigene12108_All, Unigene12123_All, Unigene12187_All, Unigene12419_All, Unigene12422_All, Unigene12480_All, Unigene12578_All, Unigene13152_All, Unigene13211_All, Unigene14496_All, Unigene15429_All, Unigene1575_All, Unigene2215_All, Unigene2853_All, Unigene4011_All, Unigene4845_All, Unigene4853_All, Unigene4858_All, Unigene5230_All, Unigene6980_All                                                                                                                                                                                                                                                                                                                                                                                                                                                                                                                                                                                                                                                                                                                                                                                                                                                                                                                                                                                                                                                                                                                                                              |
| 192 | <a href="#">N-Glycan biosynthesis</a>           | CL1135.Contig2_All, CL1478.Contig1_All, CL1478.Contig2_All, CL1508.Contig1_All, CL1508.Contig2_All, CL1513.Contig1_All, CL1961.Contig2_All, CL1990.Contig1_All, CL1990.Contig2_All, CL2305.Contig1_All, CL2305.Contig3_All, CL2305.Contig5_All, CL2401.Contig1_All, CL2626.Contig1_All, CL2648.Contig3_All, CL3453.Contig4_All, CL4132.Contig2_All, CL4221.Contig1_All, CL4659.Contig1_All, CL5081.Contig2_All, CL906.Contig3_All, CL906.Contig8_All, Unigene10420_All, Unigene10421_All, Unigene114_All, Unigene12001_All, Unigene12453_All, Unigene12503_All, Unigene12621_All, Unigene12750_All, Unigene13047_All, Unigene13644_All, Unigene155_All, Unigene3726_All, Unigene5770_All, Unigene7234_All, Unigene7732_All, Unigene782_All, Unigene8291_All                                                                                                                                                                                                                                                                                                                                                                                                                                                                                                                                                                                                                                                                                                                                                                                                                                                                                                                                                                              |
| 193 | <a href="#">Butanoate metabolism</a>            | CL1000.Contig2_All, CL1599.Contig1_All, CL1599.Contig4_All, CL2294.Contig1_All, CL2294.Contig2_All, CL2831.Contig1_All, CL2956.Contig2_All, CL3963.Contig1_All, Unigene10315_All, Unigene10475_All, Unigene10476_All, Unigene11062_All, Unigene11887_All, Unigene12187_All, Unigene12219_All, Unigene12236_All, Unigene12245_All, Unigene12491_All, Unigene12589_All, Unigene12801_All, Unigene12835_All, Unigene13152_All, Unigene13495_All, Unigene13673_All, Unigene15429_All, Unigene17053_All, Unigene17410_All, Unigene18312_All, Unigene18842_All, Unigene2215_All, Unigene2257_All, Unigene2853_All, Unigene2945_All, Unigene3281_All, Unigene4011_All, Unigene4853_All, Unigene4967_All, Unigene6618_All, Unigene9090_All, Unigene9634_All                                                                                                                                                                                                                                                                                                                                                                                                                                                                                                                                                                                                                                                                                                                                                                                                                                                                                                                                                                                      |
| 194 | <a href="#">Tryptophan metabolism</a>           | CL1650.Contig1_All, CL1707.Contig1_All, CL1711.Contig1_All, CL1711.Contig2_All, CL1711.Contig3_All, CL1711.Contig4_All, CL2309.Contig2_All, CL2309.Contig3_All, CL2532.Contig1_All, CL2532.Contig2_All, CL2590.Contig1_All, CL2590.Contig2_All, CL2694.Contig1_All, CL2694.Contig3_All, CL2707.Contig1_All, CL3127.Contig1_All, CL3497.Contig1_All, CL3511.Contig1_All, CL3511.Contig2_All, CL364.Contig1_All, CL364.Contig4_All, CL364.Contig7_All, CL3643.Contig2_All, CL3643.Contig6_All, CL3963.Contig1_All, CL4144.Contig3_All, CL4144.Contig4_All, CL4451.Contig1_All, CL4451.Contig2_All, CL4594.Contig1_All, CL4686.Contig2_All, CL4753.Contig1_All, CL5197.Contig2_All, CL5288.Contig2_All, CL551.Contig1_All, CL551.Contig2_All, Unigene10282_All, Unigene10299_All, Unigene10475_All, Unigene10476_All, Unigene10526_All, Unigene10686_All, Unigene10908_All, Unigene1134_All, Unigene1197_All, Unigene12187_All, Unigene12219_All, Unigene12252_All, Unigene12688_All, Unigene12738_All, Unigene12937_All, Unigene13152_All, Unigene13410_All, Unigene13441_All, Unigene13673_All, Unigene13773_All, Unigene15270_All, Unigene15429_All, Unigene16206_All, Unigene1623_All, Unigene16322_All, Unigene17527_All, Unigene18101_All, Unigene18521_All, Unigene18597_All, Unigene186_All, Unigene19038_All, Unigene20494_All, Unigene2078_All, Unigene2215_All, Unigene2724_All, Unigene27_All, Unigene2853_All, Unigene3105_All, Unigene3134_All, Unigene3450_All, Unigene4853_All, Unigene4884_All, Unigene5053_All, Unigene5060_All, Unigene5433_All, Unigene5600_All, Unigene5908_All, Unigene6134_All, Unigene6360_All, Unigene7135_All, Unigene7239_All, Unigene7663_All, Unigene8012_All, Unigene848_All, Unigene9060_All |
| 195 | <a href="#">Fanconi anemia pathway</a>          | CL120.Contig2_All, CL1484.Contig6_All, CL1484.Contig7_All, CL1493.Contig1_All, CL1795.Contig3_All, CL2340.Contig2_All, CL2372.Contig1_All, CL2372.Contig2_All, CL2372.Contig3_All, CL3669.Contig1_All, CL4073.Contig1_All, CL4073.Contig2_All, CL4237.Contig1_All, CL4849.Contig1_All, CL4849.Contig2_All, CL4849.Contig3_All, CL4925.Contig1_All, Unigene10181_All, Unigene10182_All, Unigene1056_All, Unigene1947_All, Unigene2243_All, Unigene3171_All, Unigene4187_All, Unigene4789_All, Unigene61_All, Unigene6289_All, Unigene7649_All, Unigene9245_All                                                                                                                                                                                                                                                                                                                                                                                                                                                                                                                                                                                                                                                                                                                                                                                                                                                                                                                                                                                                                                                                                                                                                                            |
| 196 | <a href="#">Histidine metabolism</a>            | CL1736.Contig1_All, CL1736.Contig2_All, CL2309.Contig2_All, CL2309.Contig3_All, CL2377.Contig2_All, CL2694.Contig1_All, CL2694.Contig3_All, CL313.Contig2_All, CL4144.Contig3_All, CL4144.Contig4_All, CL4451.Contig1_All, CL4451.Contig2_All, CL4594.Contig1_All, CL4753.Contig1_All, Unigene10282_All, Unigene10299_All, Unigene10526_All, Unigene10686_All, Unigene10908_All, Unigene1197_All, Unigene13410_All, Unigene13773_All, Unigene15270_All, Unigene16206_All, Unigene17527_All, Unigene18101_All, Unigene18183_All, Unigene186_All, Unigene19038_All, Unigene3146_All, Unigene3450_All, Unigene5053_All, Unigene6360_All                                                                                                                                                                                                                                                                                                                                                                                                                                                                                                                                                                                                                                                                                                                                                                                                                                                                                                                                                                                                                                                                                                     |
| 197 | <a href="#">Thiamine metabolism</a>             | CL4242.Contig1_All                                                                                                                                                                                                                                                                                                                                                                                                                                                                                                                                                                                                                                                                                                                                                                                                                                                                                                                                                                                                                                                                                                                                                                                                                                                                                                                                                                                                                                                                                                                                                                                                                                                                                                                       |
| 198 | <a href="#">NF-kappa B signaling pathway</a>    | CL1075.Contig2_All, CL1075.Contig3_All, CL131.Contig1_All, CL131.Contig2_All, CL188.Contig16_All, CL2182.Contig1_All, CL2182.Contig3_All, CL2182.Contig4_All, CL2306.Contig2_All, CL268.Contig2_All, CL3047.Contig1_All, CL3047.Contig2_All, CL39.Contig1_All, CL39.Contig2_All, CL39.Contig3_All, CL39.Contig4_All, CL3979.Contig1_All, CL3979.Contig2_All, CL4232.Contig1_All, CL4232.Contig2_All, CL4855.Contig1_All, CL4855.Contig2_All, CL5326.Contig17_All, CL5391.Contig1_All, CL5391.Contig2_All, CL940.Contig3_All, CL940.Contig5_All, Unigene10619_All, Unigene1247_All, Unigene12591_All, Unigene12868_All, Unigene13134_All, Unigene15257_All, Unigene1757_All, Unigene18898_All, Unigene20095_All, Unigene3131_All, Unigene5995_All, Unigene6911_All, Unigene7220_All, Unigene8056_All, Unigene8246_All, Unigene8988_All                                                                                                                                                                                                                                                                                                                                                                                                                                                                                                                                                                                                                                                                                                                                                                                                                                                                                                    |

|     |                                                                     |                                                                                                                                                                                                                                                                                                                                                                                                                                                                                                                                                                                                                                                                                                                                                                                                                                                                                                                                                                                                                                                                                                                                                                                                                                                                                                                                                                                                                                                                                                                                                                                                                                                                                                                                                                                                                                                                                                                                                                                                                                                                                                                                                                                                                           |
|-----|---------------------------------------------------------------------|---------------------------------------------------------------------------------------------------------------------------------------------------------------------------------------------------------------------------------------------------------------------------------------------------------------------------------------------------------------------------------------------------------------------------------------------------------------------------------------------------------------------------------------------------------------------------------------------------------------------------------------------------------------------------------------------------------------------------------------------------------------------------------------------------------------------------------------------------------------------------------------------------------------------------------------------------------------------------------------------------------------------------------------------------------------------------------------------------------------------------------------------------------------------------------------------------------------------------------------------------------------------------------------------------------------------------------------------------------------------------------------------------------------------------------------------------------------------------------------------------------------------------------------------------------------------------------------------------------------------------------------------------------------------------------------------------------------------------------------------------------------------------------------------------------------------------------------------------------------------------------------------------------------------------------------------------------------------------------------------------------------------------------------------------------------------------------------------------------------------------------------------------------------------------------------------------------------------------|
| 199 | <a href="#">RIG-I-like receptor signaling pathway</a>               | CL2306.Contig2_All, CL2654.Contig3_All, CL4017.Contig3_All, CL4966.Contig1_All, CL5115.Contig1_All, CL88.Contig2_All, CL88.Contig3_All, Unigene10069_All, Unigene10897_All, Unigene1247_All, Unigene13060_All, Unigene13252_All, Unigene1757_All, Unigene220_All, Unigene3131_All, Unigene5650_All, Unigene6973_All                                                                                                                                                                                                                                                                                                                                                                                                                                                                                                                                                                                                                                                                                                                                                                                                                                                                                                                                                                                                                                                                                                                                                                                                                                                                                                                                                                                                                                                                                                                                                                                                                                                                                                                                                                                                                                                                                                       |
| 200 | <a href="#">Cyanoamino acid metabolism</a>                          | CL143.Contig1_All, CL143.Contig2_All, CL1707.Contig1_All, CL317.Contig2_All, CL3643.Contig2_All, CL3643.Contig6_All, CL5197.Contig2_All, CL5288.Contig2_All, Unigene10732_All, Unigene1623_All, Unigene3134_All, Unigene5433_All, Unigene6134_All, Unigene848_All, Unigene9060_All                                                                                                                                                                                                                                                                                                                                                                                                                                                                                                                                                                                                                                                                                                                                                                                                                                                                                                                                                                                                                                                                                                                                                                                                                                                                                                                                                                                                                                                                                                                                                                                                                                                                                                                                                                                                                                                                                                                                        |
| 201 | <a href="#">Acute myeloid leukemia</a>                              | CL1066.Contig1_All, CL1066.Contig2_All, CL1066.Contig3_All, CL1387.Contig1_All, CL1387.Contig3_All, CL1648.Contig1_All, CL1807.Contig1_All, CL1807.Contig2_All, CL2038.Contig1_All, CL2038.Contig7_All, CL3632.Contig2_All, CL3632.Contig3_All, CL367.Contig1_All, CL367.Contig2_All, CL367.Contig3_All, CL3796.Contig2_All, CL3796.Contig3_All, CL4439.Contig2_All, CL4787.Contig1_All, CL695.Contig16_All, Unigene10001_All, Unigene10174_All, Unigene12671_All, Unigene1757_All, Unigene2749_All, Unigene2956_All, Unigene3168_All, Unigene6222_All, Unigene7745_All, Unigene777_All, Unigene8046_All, Unigene8747_All, Unigene9738_All                                                                                                                                                                                                                                                                                                                                                                                                                                                                                                                                                                                                                                                                                                                                                                                                                                                                                                                                                                                                                                                                                                                                                                                                                                                                                                                                                                                                                                                                                                                                                                                |
| 202 | <a href="#">Alanine, aspartate and glutamate metabolism</a>         | CL1000.Contig2_All, CL1599.Contig1_All, CL1599.Contig2_All, CL3118.Contig1_All, CL3118.Contig2_All, CL3127.Contig1_All, CL3283.Contig1_All, CL5320.Contig2_All, CL567.Contig4_All, CL580.Contig2_All, CL580.Contig3_All, Unigene10168_All, Unigene10169_All, Unigene10204_All, Unigene10205_All, Unigene10412_All, Unigene10883_All, Unigene10884_All, Unigene10909_All, Unigene10910_All, Unigene11336_All, Unigene1145_All, Unigene11887_All, Unigene12466_All, Unigene12470_All, Unigene12475_All, Unigene12835_All, Unigene13121_All, Unigene13174_All, Unigene18234_All, Unigene3655_All, Unigene4139_All, Unigene66_All, Unigene6731_All, Unigene6749_All, Unigene848_All, Unigene9215_All                                                                                                                                                                                                                                                                                                                                                                                                                                                                                                                                                                                                                                                                                                                                                                                                                                                                                                                                                                                                                                                                                                                                                                                                                                                                                                                                                                                                                                                                                                                          |
| 203 | <a href="#">Regulation of autophagy</a>                             | CL1273.Contig1_All, CL1273.Contig2_All, CL1579.Contig4_All, CL2321.Contig1_All, CL2321.Contig2_All, CL3112.Contig3_All, CL3990.Contig6_All, CL557.Contig1_All, Unigene1155_All, Unigene11856_All, Unigene13621_All, Unigene4159_All, Unigene7113_All                                                                                                                                                                                                                                                                                                                                                                                                                                                                                                                                                                                                                                                                                                                                                                                                                                                                                                                                                                                                                                                                                                                                                                                                                                                                                                                                                                                                                                                                                                                                                                                                                                                                                                                                                                                                                                                                                                                                                                      |
| 204 | <a href="#">Ubiquinone and other terpenoid-quinone biosynthesis</a> | CL1214.Contig2_All, CL2164.Contig1_All, CL2164.Contig2_All, CL238.Contig3_All, CL3127.Contig1_All, CL3599.Contig2_All, CL4176.Contig2_All, Unigene11217_All, Unigene11218_All, Unigene11226_All, Unigene11310_All, Unigene12424_All, Unigene14433_All, Unigene15509_All, Unigene15510_All, Unigene18265_All, Unigene4098_All, Unigene4197_All, Unigene4383_All, Unigene5996_All, Unigene6674_All                                                                                                                                                                                                                                                                                                                                                                                                                                                                                                                                                                                                                                                                                                                                                                                                                                                                                                                                                                                                                                                                                                                                                                                                                                                                                                                                                                                                                                                                                                                                                                                                                                                                                                                                                                                                                          |
| 205 | <a href="#">Drug metabolism - cytochrome P450</a>                   | CL1176.Contig4_All, CL1584.Contig2_All, CL1711.Contig1_All, CL1711.Contig2_All, CL1711.Contig3_All, CL1879.Contig2_All, CL1879.Contig3_All, CL1879.Contig4_All, CL2308.Contig1_All, CL2370.Contig2_All, CL2370.Contig3_All, CL2370.Contig4_All, CL2411.Contig1_All, CL2456.Contig3_All, CL2532.Contig1_All, CL2595.Contig1_All, CL2707.Contig1_All, CL3078.Contig1_All, CL3511.Contig2_All, CL3618.Contig1_All, CL3654.Contig1_All, CL3654.Contig2_All, CL3784.Contig1_All, CL3788.Contig1_All, CL4110.Contig1_All, CL4110.Contig2_All, CL4451.Contig1_All, CL4451.Contig2_All, CL4453.Contig1_All, CL450.Contig10_All, CL490.Contig1_All, CL490.Contig2_All, CL490.Contig3_All, CL4969.Contig1_All, CL5198.Contig1_All, CL5198.Contig2_All, CL720.Contig1_All, CL720.Contig4_All, CL731.Contig1_All, CL744.Contig1_All, CL744.Contig2_All, CL949.Contig3_All, Unigene10381_All, Unigene1120_All, Unigene1134_All, Unigene11788_All, Unigene11916_All, Unigene11949_All, Unigene1197_All, Unigene12008_All, Unigene12272_All, Unigene12297_All, Unigene12509_All, Unigene12961_All, Unigene13410_All, Unigene13727_All, Unigene13773_All, Unigene1385_All, Unigene147_All, Unigene15435_All, Unigene15451_All, Unigene15946_All, Unigene16322_All, Unigene18028_All, Unigene18489_All, Unigene18597_All, Unigene19024_All, Unigene19310_All, Unigene19340_All, Unigene19987_All, Unigene2078_All, Unigene2107_All, Unigene2294_All, Unigene2312_All, Unigene2322_All, Unigene2660_All, Unigene2675_All, Unigene27_All, Unigene2914_All, Unigene2928_All, Unigene3012_All, Unigene3125_All, Unigene3132_All, Unigene3654_All, Unigene3689_All, Unigene3701_All, Unigene3771_All, Unigene3936_All, Unigene432_All, Unigene4342_All, Unigene4564_All, Unigene4626_All, Unigene4675_All, Unigene5053_All, Unigene5060_All, Unigene5180_All, Unigene526_All, Unigene5338_All, Unigene5600_All, Unigene5637_All, Unigene5751_All, Unigene5834_All, Unigene5870_All, Unigene6129_All, Unigene6360_All, Unigene6650_All, Unigene6673_All, Unigene7135_All, Unigene7548_All, Unigene7663_All, Unigene8049_All, Unigene8218_All, Unigene8997_All, Unigene908_All, Unigene9227_All, Unigene923_All, Unigene9298_All, Unigene9654_All |
| 206 | <a href="#">Valine, leucine and isoleucine degradation</a>          | CL1353.Contig1_All, CL1353.Contig3_All, CL1404.Contig2_All, CL2309.Contig2_All, CL2309.Contig3_All, CL2694.Contig1_All, CL2694.Contig3_All, CL3963.Contig1_All, CL4091.Contig1_All, CL4091.Contig2_All, CL4144.Contig3_All, CL4144.Contig4_All, CL4451.Contig1_All, CL4451.Contig2_All, CL4646.Contig2_All, CL4753.Contig1_All, Unigene10157_All, Unigene10158_All, Unigene10247_All, Unigene10248_All, Unigene10282_All, Unigene10287_All, Unigene10299_All, Unigene10311_All, Unigene10475_All, Unigene10476_All, Unigene10526_All, Unigene10686_All, Unigene10908_All, Unigene11003_All, Unigene11230_All, Unigene11231_All, Unigene11232_All, Unigene1139_All, Unigene11854_All, Unigene11887_All, Unigene1197_All, Unigene12169_All, Unigene12187_All, Unigene12211_All, Unigene12219_All, Unigene12227_All, Unigene12259_All, Unigene12293_All, Unigene12407_All, Unigene12412_All, Unigene12419_All, Unigene12422_All, Unigene12480_All, Unigene12732_All, Unigene12959_All, Unigene13080_All, Unigene13152_All, Unigene13410_All, Unigene13431_All, Unigene13445_All, Unigene13673_All, Unigene13773_All, Unigene14111_All, Unigene15270_All, Unigene15429_All, Unigene16206_All, Unigene17527_All, Unigene18101_All, Unigene18651_All, Unigene186_All, Unigene19038_All, Unigene2215_All, Unigene2853_All, Unigene2945_All, Unigene3383_All, Unigene3450_All, Unigene4853_All, Unigene5053_All, Unigene6360_All, Unigene7153_All, Unigene7814_All, Unigene7834_All, Unigene7886_All, Unigene9634_All, Unigene9773_All                                                                                                                                                                                                                                                                                                                                                                                                                                                                                                                                                                                                                                                                                            |

|     |                                                                        |                                                                                                                                                                                                                                                                                                                                                                                                                                                                                                                                                                                                                                                                                                                                                                                                                                                                                                                                                                                                                                                                                                                                                                                                                                                                                                                                                                                                                                                                                                                                                                                                                                                                                                                                                                                                                                                                                                                                                                                                                                                                                                                                                                                                                                                                                                                                                                                                                                                                                                                                                        |
|-----|------------------------------------------------------------------------|--------------------------------------------------------------------------------------------------------------------------------------------------------------------------------------------------------------------------------------------------------------------------------------------------------------------------------------------------------------------------------------------------------------------------------------------------------------------------------------------------------------------------------------------------------------------------------------------------------------------------------------------------------------------------------------------------------------------------------------------------------------------------------------------------------------------------------------------------------------------------------------------------------------------------------------------------------------------------------------------------------------------------------------------------------------------------------------------------------------------------------------------------------------------------------------------------------------------------------------------------------------------------------------------------------------------------------------------------------------------------------------------------------------------------------------------------------------------------------------------------------------------------------------------------------------------------------------------------------------------------------------------------------------------------------------------------------------------------------------------------------------------------------------------------------------------------------------------------------------------------------------------------------------------------------------------------------------------------------------------------------------------------------------------------------------------------------------------------------------------------------------------------------------------------------------------------------------------------------------------------------------------------------------------------------------------------------------------------------------------------------------------------------------------------------------------------------------------------------------------------------------------------------------------------------|
| 207 | <a href="#">Steroid hormone biosynthesis</a>                           | CL1176.Contig4_All, CL1902.Contig2_All, CL1997.Contig2_All, CL2308.Contig1_All, CL2370.Contig2_All, CL2370.Contig3_All, CL2370.Contig4_All, CL2386.Contig4_All, CL3654.Contig1_All, CL3654.Contig2_All, CL3950.Contig2_All, CL4110.Contig1_All, CL4110.Contig2_All, CL4585.Contig1_All, CL490.Contig1_All, CL490.Contig2_All, CL490.Contig3_All, CL720.Contig1_All, CL720.Contig4_All, CL744.Contig1_All, CL744.Contig2_All, Unigene10147_All, Unigene1120_All, Unigene12297_All, Unigene12597_All, Unigene13537_All, Unigene147_All, Unigene15946_All, Unigene18028_All, Unigene18489_All, Unigene19987_All, Unigene2107_All, Unigene2312_All, Unigene2660_All, Unigene2675_All, Unigene3012_All, Unigene3125_All, Unigene3132_All, Unigene3701_All, Unigene3771_All, Unigene4011_All, Unigene4342_All, Unigene4564_All, Unigene4675_All, Unigene4739_All, Unigene526_All, Unigene5637_All, Unigene5751_All, Unigene6034_All, Unigene6129_All, Unigene6650_All, Unigene6673_All, Unigene6821_All, Unigene8049_All, Unigene8218_All, Unigene9227_All                                                                                                                                                                                                                                                                                                                                                                                                                                                                                                                                                                                                                                                                                                                                                                                                                                                                                                                                                                                                                                                                                                                                                                                                                                                                                                                                                                                                                                                                                                   |
| 208 | <a href="#">D-Glutamine and D-glutamate metabolism</a>                 | CL3118.Contig1_All, CL3118.Contig2_All, CL5320.Contig2_All, CL567.Contig4_All, Unigene9215_All                                                                                                                                                                                                                                                                                                                                                                                                                                                                                                                                                                                                                                                                                                                                                                                                                                                                                                                                                                                                                                                                                                                                                                                                                                                                                                                                                                                                                                                                                                                                                                                                                                                                                                                                                                                                                                                                                                                                                                                                                                                                                                                                                                                                                                                                                                                                                                                                                                                         |
| 209 | <a href="#">Autoimmune thyroid disease</a>                             | Unigene20260_All, Unigene4489_All, Unigene5493_All, Unigene6916_All, Unigene833_All                                                                                                                                                                                                                                                                                                                                                                                                                                                                                                                                                                                                                                                                                                                                                                                                                                                                                                                                                                                                                                                                                                                                                                                                                                                                                                                                                                                                                                                                                                                                                                                                                                                                                                                                                                                                                                                                                                                                                                                                                                                                                                                                                                                                                                                                                                                                                                                                                                                                    |
| 210 | <a href="#">Synthesis and degradation of ketone bodies</a>             | Unigene12219_All, Unigene13673_All, Unigene2945_All, Unigene9634_All                                                                                                                                                                                                                                                                                                                                                                                                                                                                                                                                                                                                                                                                                                                                                                                                                                                                                                                                                                                                                                                                                                                                                                                                                                                                                                                                                                                                                                                                                                                                                                                                                                                                                                                                                                                                                                                                                                                                                                                                                                                                                                                                                                                                                                                                                                                                                                                                                                                                                   |
| 211 | <a href="#">Glycosylphosphatidylinositol(GPI)-anch or biosynthesis</a> | CL1.Contig1_All, CL2607.Contig1_All, CL2607.Contig2_All, CL3107.Contig1_All, CL396.Contig25_All, CL396.Contig26_All, CL396.Contig28_All, CL396.Contig29_All, CL396.Contig30_All, CL396.Contig31_All, CL396.Contig33_All, CL396.Contig34_All, CL396.Contig35_All, Unigene1773_All, Unigene4796_All                                                                                                                                                                                                                                                                                                                                                                                                                                                                                                                                                                                                                                                                                                                                                                                                                                                                                                                                                                                                                                                                                                                                                                                                                                                                                                                                                                                                                                                                                                                                                                                                                                                                                                                                                                                                                                                                                                                                                                                                                                                                                                                                                                                                                                                      |
| 212 | <a href="#">Glycine, serine and threonine metabolism</a>               | CL33.Contig1_All, CL3315.Contig3_All, CL3315.Contig4_All, CL3364.Contig2_All, CL348.Contig1_All, CL348.Contig2_All, CL3490.Contig1_All, CL3490.Contig2_All, CL4971.Contig2_All, CL580.Contig2_All, CL584.Contig10_All, CL584.Contig15_All, CL584.Contig17_All, CL584.Contig1_All, CL584.Contig3_All, CL584.Contig4_All, CL584.Contig6_All, CL584.Contig7_All, Unigene10190_All, Unigene10191_All, Unigene10306_All, Unigene10403_All, Unigene10404_All, Unigene10732_All, Unigene11180_All, Unigene11181_All, Unigene11182_All, Unigene12300_All, Unigene12732_All, Unigene13027_All, Unigene13041_All, Unigene13254_All, Unigene14042_All, Unigene18088_All, Unigene3482_All, Unigene4809_All, Unigene5691_All, Unigene5758_All, Unigene6074_All, Unigene799_All, Unigene9204_All                                                                                                                                                                                                                                                                                                                                                                                                                                                                                                                                                                                                                                                                                                                                                                                                                                                                                                                                                                                                                                                                                                                                                                                                                                                                                                                                                                                                                                                                                                                                                                                                                                                                                                                                                                     |
| 213 | <a href="#">Citrate cycle (TCA cycle)</a>                              | CL2294.Contig4_All, CL2430.Contig3_All, CL3808.Contig2_All, CL4130.Contig1_All, CL4130.Contig2_All, CL4534.Contig2_All, CL4534.Contig3_All, CL4570.Contig1_All, CL5078.Contig12_All, CL5078.Contig8_All, CL5301.Contig1_All, CL5301.Contig2_All, CL957.Contig6_All, Unigene10029_All, Unigene10098_All, Unigene10418_All, Unigene10505_All, Unigene10599_All, Unigene10818_All, Unigene10929_All, Unigene10954_All, Unigene11020_All, Unigene11028_All, Unigene11062_All, Unigene11186_All, Unigene11187_All, Unigene11188_All, Unigene11277_All, Unigene11278_All, Unigene11279_All, Unigene11838_All, Unigene11930_All, Unigene12004_All, Unigene12281_All, Unigene12286_All, Unigene12384_All, Unigene12397_All, Unigene12399_All, Unigene12421_All, Unigene12491_All, Unigene12502_All, Unigene12585_All, Unigene12587_All, Unigene12589_All, Unigene12688_All, Unigene12732_All, Unigene12800_All, Unigene12801_All, Unigene12869_All, Unigene13117_All, Unigene13177_All, Unigene13505_All, Unigene16508_All, Unigene17053_All, Unigene17410_All, Unigene17564_All, Unigene17971_All, Unigene18238_All, Unigene18312_All, Unigene18841_All, Unigene18842_All, Unigene1980_All, Unigene236_All, Unigene5554_All, Unigene6618_All, Unigene8563_All, Unigene999_All                                                                                                                                                                                                                                                                                                                                                                                                                                                                                                                                                                                                                                                                                                                                                                                                                                                                                                                                                                                                                                                                                                                                                                                                                                                                                 |
| 214 | <a href="#">Alcoholism</a>                                             | CL1066.Contig1_All, CL1066.Contig2_All, CL1286.Contig2_All, CL1452.Contig1_All, CL1525.Contig15_All, CL1525.Contig9_All, CL1563.Contig2_All, CL1675.Contig2_All, CL1807.Contig1_All, CL1807.Contig2_All, CL1823.Contig8_All, CL187.Contig3_All, CL1874.Contig2_All, CL2131.Contig4_All, CL2131.Contig5_All, CL2131.Contig6_All, CL2131.Contig8_All, CL2197.Contig3_All, CL244.Contig2_All, CL2468.Contig1_All, CL2468.Contig2_All, CL2762.Contig4_All, CL2901.Contig2_All, CL2901.Contig3_All, CL2901.Contig4_All, CL2901.Contig5_All, CL2901.Contig8_All, CL3032.Contig2_All, CL3215.Contig1_All, CL3215.Contig2_All, CL3215.Contig3_All, CL3286.Contig1_All, CL3667.Contig1_All, CL3667.Contig2_All, CL3667.Contig3_All, CL3689.Contig2_All, CL3920.Contig2_All, CL3948.Contig3_All, CL4002.Contig1_All, CL4004.Contig1_All, CL4004.Contig2_All, CL4395.Contig1_All, CL4418.Contig2_All, CL4439.Contig2_All, CL4509.Contig1_All, CL4509.Contig2_All, CL4559.Contig2_All, CL4559.Contig3_All, CL4594.Contig1_All, CL4787.Contig1_All, CL4890.Contig1_All, CL4923.Contig2_All, CL741.Contig2_All, CL772.Contig1_All, CL772.Contig2_All, CL838.Contig2_All, CL838.Contig3_All, CL870.Contig4_All, CL870.Contig8_All, CL870.Contig9_All, CL940.Contig3_All, CL940.Contig5_All, CL988.Contig1_All, CL988.Contig3_All, Unigene10006_All, Unigene10020_All, Unigene10045_All, Unigene10058_All, Unigene10174_All, Unigene10574_All, Unigene10831_All, Unigene11054_All, Unigene11396_All, Unigene1168_All, Unigene11913_All, Unigene12110_All, Unigene12228_All, Unigene12315_All, Unigene12671_All, Unigene12680_All, Unigene12719_All, Unigene13107_All, Unigene1417_All, Unigene1512_All, Unigene1663_All, Unigene16769_All, Unigene17185_All, Unigene1743_All, Unigene176_All, Unigene19148_All, Unigene1925_All, Unigene19400_All, Unigene1941_All, Unigene20090_All, Unigene2029_All, Unigene217_All, Unigene2193_All, Unigene2196_All, Unigene2233_All, Unigene2398_All, Unigene2760_All, Unigene3217_All, Unigene3779_All, Unigene3996_All, Unigene4013_All, Unigene4022_All, Unigene4112_All, Unigene4116_All, Unigene4126_All, Unigene4532_All, Unigene4780_All, Unigene4935_All, Unigene4970_All, Unigene5179_All, Unigene5521_All, Unigene5675_All, Unigene5869_All, Unigene6217_All, Unigene6223_All, Unigene661_All, Unigene6655_All, Unigene69_All, Unigene7016_All, Unigene706_All, Unigene7298_All, Unigene7702_All, Unigene7704_All, Unigene7759_All, Unigene8046_All, Unigene8210_All, Unigene8747_All, Unigene9733_All, Unigene9904_All |
| 215 | <a href="#">Phenylalanine, tyrosine and tryptophan biosynthesis</a>    | CL3127.Contig1_All, Unigene10773_All, Unigene11226_All, Unigene11336_All, Unigene12475_All, Unigene13121_All, Unigene15509_All, Unigene15510_All                                                                                                                                                                                                                                                                                                                                                                                                                                                                                                                                                                                                                                                                                                                                                                                                                                                                                                                                                                                                                                                                                                                                                                                                                                                                                                                                                                                                                                                                                                                                                                                                                                                                                                                                                                                                                                                                                                                                                                                                                                                                                                                                                                                                                                                                                                                                                                                                       |



|     |                                                              |                                                                                                                                                                                                                                                                                                                                                                                                                                                                                                                                                                                                                                                                                                                                                                                                                                                                                                                                                                                                                                                                                                                                                                                                                                                                                                                                                                                                                                                                                                                                                                                                                                                                                                                                                                                                                                                                                                                                                                                                                                                                                                                                                                                                                                                                |
|-----|--------------------------------------------------------------|----------------------------------------------------------------------------------------------------------------------------------------------------------------------------------------------------------------------------------------------------------------------------------------------------------------------------------------------------------------------------------------------------------------------------------------------------------------------------------------------------------------------------------------------------------------------------------------------------------------------------------------------------------------------------------------------------------------------------------------------------------------------------------------------------------------------------------------------------------------------------------------------------------------------------------------------------------------------------------------------------------------------------------------------------------------------------------------------------------------------------------------------------------------------------------------------------------------------------------------------------------------------------------------------------------------------------------------------------------------------------------------------------------------------------------------------------------------------------------------------------------------------------------------------------------------------------------------------------------------------------------------------------------------------------------------------------------------------------------------------------------------------------------------------------------------------------------------------------------------------------------------------------------------------------------------------------------------------------------------------------------------------------------------------------------------------------------------------------------------------------------------------------------------------------------------------------------------------------------------------------------------|
| 216 | <a href="#">Steroid biosynthesis</a>                         | CL1004.Contig1_All, CL1580.Contig1_All, CL3897.Contig1_All, CL4485.Contig1_All, CL4485.Contig3_All, CL4602.Contig1_All, Unigene2740_All, Unigene4866_All, Unigene4873_All, Unigene5266_All, Unigene5713_All, Unigene666_All, Unigene8065_All                                                                                                                                                                                                                                                                                                                                                                                                                                                                                                                                                                                                                                                                                                                                                                                                                                                                                                                                                                                                                                                                                                                                                                                                                                                                                                                                                                                                                                                                                                                                                                                                                                                                                                                                                                                                                                                                                                                                                                                                                   |
| 217 | <a href="#">Tyrosine metabolism</a>                          | CL137.Contig1_All, CL137.Contig2_All, CL1685.Contig2_All, CL1736.Contig1_All, CL1736.Contig2_All, CL1879.Contig2_All, CL1879.Contig3_All, CL1879.Contig4_All, CL2377.Contig2_All, CL252.Contig2_All, CL252.Contig3_All, CL2595.Contig1_All, CL3127.Contig1_All, CL3156.Contig1_All, CL3818.Contig1_All, CL4451.Contig1_All, CL4451.Contig2_All, CL4489.Contig1_All, CL4594.Contig1_All, CL5230.Contig2_All, CL5315.Contig1_All, Unigene10226_All, Unigene10747_All, Unigene11038_All, Unigene11039_All, Unigene11217_All, Unigene11218_All, Unigene11226_All, Unigene11336_All, Unigene11788_All, Unigene1197_All, Unigene12292_All, Unigene12475_All, Unigene12509_All, Unigene13121_All, Unigene13410_All, Unigene13727_All, Unigene13773_All, Unigene13880_All, Unigene14369_All, Unigene15509_All, Unigene15510_All, Unigene18183_All, Unigene18265_All, Unigene19024_All, Unigene19340_All, Unigene2322_All, Unigene2915_All, Unigene2928_All, Unigene3146_All, Unigene3417_All, Unigene417_All, Unigene4626_All, Unigene4901_All, Unigene5053_All, Unigene5180_All, Unigene5338_All, Unigene6060_All, Unigene6162_All, Unigene6360_All, Unigene6387_All, Unigene6916_All, Unigene8213_All, Unigene833_All, Unigene923_All                                                                                                                                                                                                                                                                                                                                                                                                                                                                                                                                                                                                                                                                                                                                                                                                                                                                                                                                                                                                                                |
| 218 | <a href="#">Metabolism of xenobiotics by cytochrome P450</a> | CL1176.Contig4_All, CL1584.Contig2_All, CL1684.Contig1_All, CL1711.Contig1_All, CL1711.Contig2_All, CL1711.Contig3_All, CL1879.Contig2_All, CL1879.Contig3_All, CL1879.Contig4_All, CL2308.Contig1_All, CL2370.Contig2_All, CL2370.Contig3_All, CL2370.Contig4_All, CL2411.Contig1_All, CL2456.Contig3_All, CL2532.Contig1_All, CL2595.Contig1_All, CL2707.Contig1_All, CL2894.Contig1_All, CL2894.Contig2_All, CL2894.Contig3_All, CL3078.Contig1_All, CL3511.Contig2_All, CL3618.Contig1_All, CL3654.Contig1_All, CL3654.Contig2_All, CL3784.Contig1_All, CL3788.Contig1_All, CL4110.Contig1_All, CL4110.Contig2_All, CL4451.Contig1_All, CL4451.Contig2_All, CL4453.Contig1_All, CL450.Contig10_All, CL490.Contig1_All, CL490.Contig2_All, CL490.Contig3_All, CL4969.Contig1_All, CL720.Contig1_All, CL720.Contig4_All, CL731.Contig1_All, CL744.Contig1_All, CL744.Contig2_All, Unigene10381_All, Unigene1120_All, Unigene1134_All, Unigene11788_All, Unigene11916_All, Unigene11949_All, Unigene1197_All, Unigene12008_All, Unigene12297_All, Unigene12509_All, Unigene13410_All, Unigene13727_All, Unigene13773_All, Unigene1385_All, Unigene147_All, Unigene15435_All, Unigene15451_All, Unigene15946_All, Unigene16322_All, Unigene17598_All, Unigene18028_All, Unigene18489_All, Unigene18597_All, Unigene18597_All, Unigene19024_All, Unigene19310_All, Unigene19340_All, Unigene19987_All, Unigene2078_All, Unigene2107_All, Unigene2312_All, Unigene2322_All, Unigene239_All, Unigene2660_All, Unigene2675_All, Unigene27_All, Unigene2914_All, Unigene2928_All, Unigene3012_All, Unigene3125_All, Unigene3132_All, Unigene3689_All, Unigene3701_All, Unigene3771_All, Unigene3936_All, Unigene432_All, Unigene4342_All, Unigene4564_All, Unigene4626_All, Unigene4675_All, Unigene4991_All, Unigene5053_All, Unigene5060_All, Unigene5180_All, Unigene526_All, Unigene5338_All, Unigene5600_All, Unigene5637_All, Unigene5751_All, Unigene5834_All, Unigene5870_All, Unigene6104_All, Unigene6129_All, Unigene6360_All, Unigene6650_All, Unigene6673_All, Unigene7135_All, Unigene7548_All, Unigene7663_All, Unigene8049_All, Unigene8218_All, Unigene8997_All, Unigene908_All, Unigene9227_All, Unigene923_All, Unigene9298_All, Unigene9950_All |
| 219 | <a href="#">B cell receptor signaling pathway</a>            | CL1066.Contig1_All, CL1066.Contig2_All, CL1066.Contig3_All, CL1535.Contig3_All, CL1618.Contig2_All, CL1807.Contig1_All, CL1807.Contig2_All, CL1831.Contig1_All, CL1831.Contig2_All, CL1843.Contig3_All, CL188.Contig16_All, CL1954.Contig1_All, CL1954.Contig2_All, CL2182.Contig1_All, CL2182.Contig3_All, CL2182.Contig4_All, CL3311.Contig1_All, CL3311.Contig2_All, CL367.Contig1_All, CL367.Contig2_All, CL367.Contig3_All, CL39.Contig1_All, CL39.Contig2_All, CL39.Contig3_All, CL39.Contig4_All, CL4190.Contig1_All, CL4439.Contig2_All, CL4521.Contig1_All, CL4521.Contig2_All, CL4521.Contig3_All, CL4521.Contig5_All, CL4597.Contig2_All, CL4736.Contig1_All, CL4736.Contig2_All, CL4787.Contig1_All, CL5064.Contig2_All, CL5391.Contig1_All, CL5391.Contig2_All, CL695.Contig16_All, CL940.Contig3_All, CL940.Contig5_All, Unigene10174_All, Unigene11922_All, Unigene12671_All, Unigene13853_All, Unigene1479_All, Unigene15257_All, Unigene1757_All, Unigene18898_All, Unigene236_All, Unigene247_All, Unigene2749_All, Unigene7297_All, Unigene8046_All, Unigene8217_All, Unigene8784_All                                                                                                                                                                                                                                                                                                                                                                                                                                                                                                                                                                                                                                                                                                                                                                                                                                                                                                                                                                                                                                                                                                                                                       |
| 220 | <a href="#">Renal cell carcinoma</a>                         | CL1049.Contig4_All, CL1066.Contig1_All, CL1066.Contig2_All, CL1066.Contig3_All, CL1535.Contig3_All, CL1807.Contig1_All, CL1807.Contig2_All, CL2170.Contig2_All, CL2170.Contig5_All, CL2222.Contig9_All, CL2658.Contig1_All, CL2658.Contig2_All, CL271.Contig2_All, CL2722.Contig1_All, CL2793.Contig1_All, CL2793.Contig2_All, CL3162.Contig2_All, CL367.Contig1_All, CL367.Contig2_All, CL367.Contig3_All, CL4381.Contig1_All, CL4439.Contig2_All, CL4510.Contig1_All, CL4736.Contig1_All, CL4736.Contig2_All, CL4787.Contig1_All, CL493.Contig2_All, CL524.Contig10_All, CL524.Contig11_All, CL524.Contig12_All, CL524.Contig13_All, CL524.Contig14_All, CL524.Contig15_All, CL524.Contig16_All, CL524.Contig17_All, CL524.Contig18_All, CL524.Contig1_All, CL524.Contig3_All, CL524.Contig4_All, CL524.Contig5_All, CL524.Contig6_All, CL524.Contig9_All, CL5469.Contig2_All, CL614.Contig2_All, CL695.Contig16_All, CL903.Contig1_All, Unigene10174_All, Unigene10876_All, Unigene11020_All, Unigene12660_All, Unigene12671_All, Unigene13036_All, Unigene13505_All, Unigene13588_All, Unigene1479_All, Unigene1679_All, Unigene2749_All, Unigene54_All, Unigene5781_All, Unigene695_All, Unigene7777_All, Unigene8046_All, Unigene8277_All, Unigene8725_All, Unigene8747_All, Unigene9719_All                                                                                                                                                                                                                                                                                                                                                                                                                                                                                                                                                                                                                                                                                                                                                                                                                                                                                                                                                             |
| 221 | <a href="#">One carbon pool by folate</a>                    | CL1855.Contig1_All, CL3650.Contig2_All, Unigene10732_All, Unigene10880_All, Unigene10997_All, Unigene11730_All, Unigene13418_All, Unigene3792_All, Unigene3818_All                                                                                                                                                                                                                                                                                                                                                                                                                                                                                                                                                                                                                                                                                                                                                                                                                                                                                                                                                                                                                                                                                                                                                                                                                                                                                                                                                                                                                                                                                                                                                                                                                                                                                                                                                                                                                                                                                                                                                                                                                                                                                             |



|     |                                                          |                                                                                                                                                                                                                                                                                                                                                                                                                                                                                                                                                                                                                                                                                                                                                                                                                                                                                                                                                                                                                                                                                                                                                                                                                                                                                                                                                                                                                                                                                                                                                                                                                                                                                                                                                                                                                                                                                                                                                                                                                                                                                                                                                                                                                                                                                                                                                                                                                                                                                                                                                                                                                                                                                                                                                                                                                                                                                                                                                                                                                                                                                                                                                                                                                                                                                                                                                                                                                                                                                                                                                                                                                                                                                                                                                                                                                                                                                         |
|-----|----------------------------------------------------------|-----------------------------------------------------------------------------------------------------------------------------------------------------------------------------------------------------------------------------------------------------------------------------------------------------------------------------------------------------------------------------------------------------------------------------------------------------------------------------------------------------------------------------------------------------------------------------------------------------------------------------------------------------------------------------------------------------------------------------------------------------------------------------------------------------------------------------------------------------------------------------------------------------------------------------------------------------------------------------------------------------------------------------------------------------------------------------------------------------------------------------------------------------------------------------------------------------------------------------------------------------------------------------------------------------------------------------------------------------------------------------------------------------------------------------------------------------------------------------------------------------------------------------------------------------------------------------------------------------------------------------------------------------------------------------------------------------------------------------------------------------------------------------------------------------------------------------------------------------------------------------------------------------------------------------------------------------------------------------------------------------------------------------------------------------------------------------------------------------------------------------------------------------------------------------------------------------------------------------------------------------------------------------------------------------------------------------------------------------------------------------------------------------------------------------------------------------------------------------------------------------------------------------------------------------------------------------------------------------------------------------------------------------------------------------------------------------------------------------------------------------------------------------------------------------------------------------------------------------------------------------------------------------------------------------------------------------------------------------------------------------------------------------------------------------------------------------------------------------------------------------------------------------------------------------------------------------------------------------------------------------------------------------------------------------------------------------------------------------------------------------------------------------------------------------------------------------------------------------------------------------------------------------------------------------------------------------------------------------------------------------------------------------------------------------------------------------------------------------------------------------------------------------------------------------------------------------------------------------------------------------------------|
| 222 | <a href="#">Purine metabolism</a>                        | CL1184.Contig1_All, CL1184.Contig2_All, CL1184.Contig3_All, CL1184.Contig4_All, CL1184.Contig5_All, CL1258.Contig1_All, CL1258.Contig2_All, CL126.Contig2_All, CL1305.Contig1_All, CL134.Contig1_All, CL1356.Contig1_All, CL1356.Contig2_All, CL1388.Contig1_All, CL1395.Contig2_All, CL1411.Contig1_All, CL1411.Contig8_All, CL1418.Contig6_All, CL1418.Contig8_All, CL1559.Contig1_All, CL1683.Contig2_All, CL1683.Contig7_All, CL1986.Contig1_All, CL2272.Contig1_All, CL2301.Contig2_All, CL2301.Contig4_All, CL2326.Contig1_All, CL2326.Contig2_All, CL2326.Contig3_All, CL2326.Contig4_All, CL258.Contig1_All, CL258.Contig2_All, CL260.Contig15_All, CL2604.Contig1_All, CL2702.Contig1_All, CL2702.Contig2_All, CL2770.Contig1_All, CL2770.Contig2_All, CL2805.Contig1_All, CL2949.Contig2_All, CL3028.Contig1_All, CL322.Contig4_All, CL322.Contig5_All, CL322.Contig6_All, CL3251.Contig1_All, CL3251.Contig2_All, CL3420.Contig1_All, CL3576.Contig1_All, CL3635.Contig3_All, CL3657.Contig3_All, CL3664.Contig1_All, CL3664.Contig2_All, CL372.Contig1_All, CL3792.Contig3_All, CL3836.Contig1_All, CL3836.Contig2_All, CL4005.Contig2_All, CL4005.Contig3_All, CL4180.Contig3_All, CL4262.Contig2_All, CL4278.Contig2_All, CL4346.Contig1_All, CL440.Contig3_All, CL440.Contig5_All, CL440.Contig6_All, CL4617.Contig2_All, CL4904.Contig1_All, CL4904.Contig2_All, CL5004.Contig1_All, CL52.Contig17_All, CL52.Contig28_All, CL52.Contig35_All, CL52.Contig3_All, CL52.Contig41_All, CL5203.Contig1_All, CL5203.Contig2_All, CL5461.Contig2_All, CL593.Contig1_All, CL598.Contig1_All, CL598.Contig2_All, CL63.Contig10_All, CL63.Contig9_All, CL648.Contig2_All, CL787.Contig5_All, CL893.Contig1_All, CL91.Contig1_All, CL911.Contig1_All, Unigene10230_All, Unigene10231_All, Unigene10436_All, Unigene10549_All, Unigene10735_All, Unigene10883_All, Unigene10884_All, Unigene1105_All, Unigene1105_All, Unigene11601_All, Unigene11623_All, Unigene11741_All, Unigene11812_All, Unigene11967_All, Unigene11970_All, Unigene12017_All, Unigene1205_All, Unigene12060_All, Unigene12080_All, Unigene12096_All, Unigene12117_All, Unigene12268_All, Unigene12311_All, Unigene12365_All, Unigene12388_All, Unigene12479_All, Unigene12488_All, Unigene1248_All, Unigene12530_All, Unigene12567_All, Unigene12580_All, Unigene12623_All, Unigene12645_All, Unigene12655_All, Unigene1278_All, Unigene12887_All, Unigene13002_All, Unigene13088_All, Unigene13119_All, Unigene13284_All, Unigene143_All, Unigene1464_All, Unigene1505_All, Unigene15176_All, Unigene1570_All, Unigene15790_All, Unigene15827_All, Unigene16033_All, Unigene16134_All, Unigene16238_All, Unigene16824_All, Unigene16860_All, Unigene17253_All, Unigene17282_All, Unigene17292_All, Unigene17301_All, Unigene17448_All, Unigene17890_All, Unigene17890_All, Unigene18003_All, Unigene18004_All, Unigene18006_All, Unigene18037_All, Unigene18038_All, Unigene18127_All, Unigene18200_All, Unigene18663_All, Unigene18801_All, Unigene19291_All, Unigene19657_All, Unigene20198_All, Unigene20279_All, Unigene20289_All, Unigene2029_All, Unigene2037_All, Unigene21204_All, Unigene2131_All, Unigene2156_All, Unigene2451_All, Unigene245_All, Unigene24_All, Unigene2513_All, Unigene2686_All, Unigene2754_All, Unigene3081_All, Unigene3288_All, Unigene3390_All, Unigene33_All, Unigene3419_All, Unigene3659_All, Unigene3792_All, Unigene3890_All, Unigene4102_All, Unigene4221_All, Unigene4251_All, Unigene5063_All, Unigene5745_All, Unigene6374_All, Unigene7183_All, Unigene7192_All, Unigene7296_All, Unigene7750_All, Unigene7822_All, Unigene7869_All, Unigene7993_All, Unigene8008_All, Unigene8160_All, Unigene8228_All, Unigene8236_All, Unigene8558_All, Unigene9094_All, Unigene9107_All, Unigene9222_All, Unigene9285_All, Unigene9287_All, Unigene93_All, Unigene9758_All |
|     |                                                          | CL1353.Contig1_All, CL1353.Contig3_All, CL1650.Contig1_All, CL1711.Contig1_All, CL1711.Contig2_All, CL1711.Contig3_All, CL1711.Contig4_All, CL1879.Contig2_All, CL1879.Contig3_All, CL1879.Contig4_All, CL2309.Contig2_All, CL2309.Contig3_All, CL2532.Contig1_All, CL2532.Contig2_All, CL2590.Contig1_All, CL2590.Contig2_All, CL2595.Contig1_All, CL2694.Contig1_All, CL2694.Contig3_All, CL2707.Contig1_All, CL2943.Contig1_All, CL2943.Contig2_All, CL3511.Contig1_All, CL3511.Contig2_All, CL3536.Contig1_All, CL3536.Contig2_All, CL3536.Contig5_All, CL364.Contig1_All, CL364.Contig4_All, CL364.Contig7_All, CL3963.Contig1_All, CL4144.Contig3_All, CL4144.Contig4_All, CL4451.Contig1_All, CL4451.Contig2_All, CL4646.Contig2_All, CL4753.Contig1_All, CL507.Contig7_All, CL866.Contig1_All, CL866.Contig2_All, Unigene10157_All, Unigene10158_All, Unigene10282_All, Unigene10299_All, Unigene10311_All, Unigene10475_All, Unigene10476_All, Unigene10526_All, Unigene10686_All, Unigene10908_All, Unigene11230_All, Unigene11231_All, Unigene11232_All, Unigene1134_All, Unigene11788_All, Unigene1197_All, Unigene12187_All, Unigene12211_All, Unigene12219_All, Unigene12252_All, Unigene12419_All, Unigene12422_All, Unigene12480_All, Unigene12509_All, Unigene12937_All, Unigene13152_All, Unigene13410_All, Unigene13673_All, Unigene13727_All, Unigene13773_All, Unigene15270_All, Unigene15429_All, Unigene16206_All, Unigene16322_All, Unigene17527_All, Unigene18101_All, Unigene18521_All, Unigene18597_All, Unigene186_All, Unigene19024_All, Unigene19038_All, Unigene19340_All, Unigene20494_All, Unigene2078_All, Unigene2215_All, Unigene2322_All, Unigene2724_All, Unigene27_All, Unigene2853_All, Unigene2928_All, Unigene3383_All, Unigene3450_All, Unigene4626_All, Unigene4853_All, Unigene4884_All, Unigene5053_All, Unigene5060_All, Unigene5180_All, Unigene5338_All, Unigene5600_All, Unigene5908_All, Unigene6360_All, Unigene693_All, Unigene7046_All, Unigene7135_All, Unigene7153_All, Unigene7239_All, Unigene761_All, Unigene7663_All, Unigene7834_All, Unigene8012_All, Unigene818_All, Unigene826_All, Unigene923_All                                                                                                                                                                                                                                                                                                                                                                                                                                                                                                                                                                                                                                                                                                                                                                                                                                                                                                                                                                                                                                                                                                                                                                                                                                                                                                                                                                                                                                                                                                                                                                                                                                                                                                                      |
| 223 | <a href="#">Fatty acid metabolism</a>                    | CL1176.Contig4_All, CL1604.Contig2_All, CL1684.Contig1_All, CL2145.Contig2_All, CL2308.Contig1_All, CL2309.Contig2_All, CL2309.Contig3_All, CL2370.Contig2_All, CL2370.Contig3_All, CL2370.Contig4_All, CL2471.Contig3_All, CL2557.Contig1_All, CL2846.Contig2_All, CL3654.Contig1_All, CL3654.Contig2_All, CL370.Contig1_All, CL4110.Contig1_All, CL4110.Contig2_All, CL443.Contig1_All, CL4451.Contig1_All, CL4451.Contig2_All, CL4753.Contig1_All, CL490.Contig1_All, CL490.Contig2_All, CL490.Contig3_All, CL720.Contig1_All, CL720.Contig4_All, CL744.Contig1_All, CL744.Contig2_All, Unigene10282_All, Unigene10686_All, Unigene10908_All, Unigene1120_All, Unigene1197_All, Unigene12144_All, Unigene12297_All, Unigene12955_All, Unigene13410_All, Unigene13557_All, Unigene13671_All, Unigene13773_All, Unigene147_All, Unigene15270_All, Unigene15946_All, Unigene15981_All, Unigene16206_All, Unigene17196_All, Unigene17527_All, Unigene17957_All, Unigene18028_All, Unigene18101_All, Unigene18489_All, Unigene19038_All, Unigene20226_All, Unigene20387_All, Unigene20815_All, Unigene2107_All, Unigene2312_All, Unigene2496_All, Unigene2660_All, Unigene3012_All, Unigene3125_All, Unigene3132_All, Unigene3450_All, Unigene3701_All, Unigene3771_All, Unigene4342_All, Unigene4564_All, Unigene4675_All, Unigene4991_All, Unigene5053_All, Unigene526_All, Unigene5429_All, Unigene5637_All, Unigene5751_All, Unigene6129_All, Unigene627_All, Unigene6360_All, Unigene6650_All, Unigene6673_All, Unigene6954_All, Unigene7271_All, Unigene8049_All, Unigene8218_All, Unigene8732_All, Unigene9227_All                                                                                                                                                                                                                                                                                                                                                                                                                                                                                                                                                                                                                                                                                                                                                                                                                                                                                                                                                                                                                                                                                                                                                                                                                                                                                                                                                                                                                                                                                                                                                                                                                                                                                                                                                                                                                                                                                                                                                                                                                                                                                                                                                                                                                                                                 |
|     |                                                          |                                                                                                                                                                                                                                                                                                                                                                                                                                                                                                                                                                                                                                                                                                                                                                                                                                                                                                                                                                                                                                                                                                                                                                                                                                                                                                                                                                                                                                                                                                                                                                                                                                                                                                                                                                                                                                                                                                                                                                                                                                                                                                                                                                                                                                                                                                                                                                                                                                                                                                                                                                                                                                                                                                                                                                                                                                                                                                                                                                                                                                                                                                                                                                                                                                                                                                                                                                                                                                                                                                                                                                                                                                                                                                                                                                                                                                                                                         |
| 224 | <a href="#">Pentose and glucuronate interconversions</a> |                                                                                                                                                                                                                                                                                                                                                                                                                                                                                                                                                                                                                                                                                                                                                                                                                                                                                                                                                                                                                                                                                                                                                                                                                                                                                                                                                                                                                                                                                                                                                                                                                                                                                                                                                                                                                                                                                                                                                                                                                                                                                                                                                                                                                                                                                                                                                                                                                                                                                                                                                                                                                                                                                                                                                                                                                                                                                                                                                                                                                                                                                                                                                                                                                                                                                                                                                                                                                                                                                                                                                                                                                                                                                                                                                                                                                                                                                         |
|     |                                                          |                                                                                                                                                                                                                                                                                                                                                                                                                                                                                                                                                                                                                                                                                                                                                                                                                                                                                                                                                                                                                                                                                                                                                                                                                                                                                                                                                                                                                                                                                                                                                                                                                                                                                                                                                                                                                                                                                                                                                                                                                                                                                                                                                                                                                                                                                                                                                                                                                                                                                                                                                                                                                                                                                                                                                                                                                                                                                                                                                                                                                                                                                                                                                                                                                                                                                                                                                                                                                                                                                                                                                                                                                                                                                                                                                                                                                                                                                         |

|     |                                                                  |                                                                                                                                                                                                                                                                                                                                                                                                                                                                                                                                                                                                                                                                                                                                                                                                                                                                                                                                                                                                                                                                                                                                                                                                                                                                                                                                                                                                                                                                                                                                                                                                                                                                                                                                                                                                                                                                                                                                                                                                                                                                                                                                                       |
|-----|------------------------------------------------------------------|-------------------------------------------------------------------------------------------------------------------------------------------------------------------------------------------------------------------------------------------------------------------------------------------------------------------------------------------------------------------------------------------------------------------------------------------------------------------------------------------------------------------------------------------------------------------------------------------------------------------------------------------------------------------------------------------------------------------------------------------------------------------------------------------------------------------------------------------------------------------------------------------------------------------------------------------------------------------------------------------------------------------------------------------------------------------------------------------------------------------------------------------------------------------------------------------------------------------------------------------------------------------------------------------------------------------------------------------------------------------------------------------------------------------------------------------------------------------------------------------------------------------------------------------------------------------------------------------------------------------------------------------------------------------------------------------------------------------------------------------------------------------------------------------------------------------------------------------------------------------------------------------------------------------------------------------------------------------------------------------------------------------------------------------------------------------------------------------------------------------------------------------------------|
| 225 | <a href="#">Cell adhesion molecules (CAMs)</a>                   | CL1192.Contig1_All, CL1192.Contig2_All, CL1192.Contig3_All, CL1367.Contig3_All, CL1367.Contig4_All, CL1531.Contig1_All, CL1531.Contig2_All, CL1531.Contig3_All, CL2328.Contig2_All, CL2331.Contig2_All, CL2331.Contig3_All, CL2478.Contig3_All, CL2533.Contig3_All, CL3236.Contig1_All, CL3810.Contig1_All, CL4009.Contig1_All, CL4009.Contig2_All, CL4030.Contig3_All, CL4030.Contig4_All, CL4535.Contig1_All, CL4597.Contig2_All, CL5125.Contig1_All, CL5400.Contig1_All, CL5400.Contig2_All, CL920.Contig13_All, CL920.Contig15_All, CL920.Contig1_All, Unigene11874_All, Unigene12314_All, Unigene12810_All, Unigene133_All, Unigene17327_All, Unigene1764_All, Unigene17842_All, Unigene18906_All, Unigene19424_All, Unigene2018_All, Unigene20260_All, Unigene20583_All, Unigene2980_All, Unigene3684_All, Unigene3945_All, Unigene4207_All, Unigene5076_All, Unigene6080_All, Unigene7011_All, Unigene7196_All, Unigene8217_All, Unigene8915_All, Unigene9200_All, Unigene9740_All                                                                                                                                                                                                                                                                                                                                                                                                                                                                                                                                                                                                                                                                                                                                                                                                                                                                                                                                                                                                                                                                                                                                                             |
| 226 | <a href="#">Proximal tubule bicarbonate reclamation</a>          | CL190.Contig1_All, CL2137.Contig1_All, CL2137.Contig2_All, CL2430.Contig3_All, CL2474.Contig2_All, CL2854.Contig1_All, CL3118.Contig1_All, CL3118.Contig2_All, CL3160.Contig2_All, CL3776.Contig2_All, CL41.Contig3_All, CL41.Contig4_All, CL41.Contig8_All, CL5301.Contig1_All, CL5301.Contig2_All, CL5320.Contig2_All, CL5440.Contig1_All, CL567.Contig4_All, CL974.Contig2_All, Unigene10029_All, Unigene10594_All, Unigene10926_All, Unigene11480_All, Unigene11482_All, Unigene11483_All, Unigene11934_All, Unigene16508_All, Unigene2002_All, Unigene2003_All, Unigene3010_All, Unigene4211_All, Unigene4323_All, Unigene5724_All, Unigene6215_All, Unigene6639_All, Unigene7061_All, Unigene7206_All, Unigene9163_All, Unigene9215_All, Unigene9668_All, Unigene9711_All                                                                                                                                                                                                                                                                                                                                                                                                                                                                                                                                                                                                                                                                                                                                                                                                                                                                                                                                                                                                                                                                                                                                                                                                                                                                                                                                                                       |
| 227 | <a href="#">Glycosaminoglycan biosynthesis - keratan sulfate</a> | CL2708.Contig2_All, Unigene16539_All, Unigene4758_All, Unigene5770_All, Unigene8059_All                                                                                                                                                                                                                                                                                                                                                                                                                                                                                                                                                                                                                                                                                                                                                                                                                                                                                                                                                                                                                                                                                                                                                                                                                                                                                                                                                                                                                                                                                                                                                                                                                                                                                                                                                                                                                                                                                                                                                                                                                                                               |
| 228 | <a href="#">Galactose metabolism</a>                             | CL2471.Contig3_All, CL2557.Contig1_All, CL5115.Contig3_All, CL5403.Contig2_All, Unigene12731_All, Unigene13557_All, Unigene13671_All, Unigene1538_All, Unigene15960_All, Unigene15981_All, Unigene16824_All, Unigene17282_All, Unigene17957_All, Unigene18003_All, Unigene18004_All, Unigene20387_All, Unigene20815_All, Unigene20899_All, Unigene2496_All, Unigene5047_All, Unigene627_All, Unigene6526_All, Unigene6954_All, Unigene7271_All, Unigene7735_All, Unigene8139_All, Unigene8732_All                                                                                                                                                                                                                                                                                                                                                                                                                                                                                                                                                                                                                                                                                                                                                                                                                                                                                                                                                                                                                                                                                                                                                                                                                                                                                                                                                                                                                                                                                                                                                                                                                                                     |
| 229 | <a href="#">SNARE interactions in vesicular transport</a>        | CL2153.Contig3_All, CL3506.Contig1_All, CL3506.Contig2_All, CL3794.Contig1_All, CL42.Contig2_All, Unigene10078_All, Unigene11973_All, Unigene13396_All, Unigene14430_All, Unigene3968_All, Unigene6005_All, Unigene6662_All                                                                                                                                                                                                                                                                                                                                                                                                                                                                                                                                                                                                                                                                                                                                                                                                                                                                                                                                                                                                                                                                                                                                                                                                                                                                                                                                                                                                                                                                                                                                                                                                                                                                                                                                                                                                                                                                                                                           |
| 230 | <a href="#">Starch and sucrose metabolism</a>                    | CL1176.Contig4_All, CL1388.Contig1_All, CL2145.Contig2_All, CL2308.Contig1_All, CL2370.Contig2_All, CL2370.Contig3_All, CL2370.Contig4_All, CL2471.Contig3_All, CL3450.Contig1_All, CL3450.Contig2_All, CL3450.Contig3_All, CL3654.Contig1_All, CL3654.Contig2_All, CL4110.Contig1_All, CL4110.Contig2_All, CL4346.Contig1_All, CL490.Contig1_All, CL490.Contig2_All, CL490.Contig3_All, CL5115.Contig3_All, CL5322.Contig2_All, CL720.Contig1_All, CL720.Contig4_All, CL744.Contig1_All, CL744.Contig2_All, Unigene10167_All, Unigene10188_All, Unigene1120_All, Unigene1207_All, Unigene12223_All, Unigene12295_All, Unigene12297_All, Unigene12955_All, Unigene13375_All, Unigene13557_All, Unigene147_All, Unigene15946_All, Unigene15960_All, Unigene15981_All, Unigene16591_All, Unigene16824_All, Unigene17282_All, Unigene17535_All, Unigene17536_All, Unigene18003_All, Unigene18004_All, Unigene18028_All, Unigene18489_All, Unigene18652_All, Unigene20289_All, Unigene20387_All, Unigene20899_All, Unigene2107_All, Unigene21129_All, Unigene2312_All, Unigene2660_All, Unigene3012_All, Unigene3125_All, Unigene3132_All, Unigene3701_All, Unigene3771_All, Unigene4342_All, Unigene4564_All, Unigene4675_All, Unigene5047_All, Unigene526_All, Unigene5429_All, Unigene5637_All, Unigene5751_All, Unigene6129_All, Unigene6650_All, Unigene6673_All, Unigene6718_All, Unigene8049_All, Unigene8218_All, Unigene9227_All, Unigene9765_All, Unigene9987_All                                                                                                                                                                                                                                                                                                                                                                                                                                                                                                                                                                                                                                                                               |
| 231 | <a href="#">Retinol metabolism</a>                               | CL1176.Contig4_All, CL1329.Contig1_All, CL1353.Contig2_All, CL1604.Contig2_All, CL1711.Contig1_All, CL1711.Contig2_All, CL1711.Contig3_All, CL1879.Contig2_All, CL1879.Contig3_All, CL1879.Contig4_All, CL1902.Contig2_All, CL1997.Contig2_All, CL2308.Contig1_All, CL2370.Contig2_All, CL2370.Contig3_All, CL2370.Contig4_All, CL2532.Contig1_All, CL2595.Contig1_All, CL2707.Contig1_All, CL2846.Contig2_All, CL3158.Contig2_All, CL3158.Contig3_All, CL3511.Contig2_All, CL356.Contig20_All, CL3581.Contig2_All, CL3654.Contig1_All, CL3654.Contig2_All, CL370.Contig1_All, CL3727.Contig1_All, CL4110.Contig1_All, CL4110.Contig2_All, CL4585.Contig1_All, CL4810.Contig2_All, CL490.Contig1_All, CL490.Contig2_All, CL490.Contig3_All, CL553.Contig2_All, CL720.Contig1_All, CL720.Contig4_All, CL731.Contig1_All, CL744.Contig1_All, CL744.Contig2_All, Unigene10147_All, Unigene10153_All, Unigene10482_All, Unigene1120_All, Unigene1134_All, Unigene11788_All, Unigene12114_All, Unigene12245_All, Unigene12297_All, Unigene12509_All, Unigene12597_All, Unigene12721_All, Unigene12899_All, Unigene13270_All, Unigene13537_All, Unigene13661_All, Unigene13727_All, Unigene147_All, Unigene15946_All, Unigene16322_All, Unigene18028_All, Unigene18489_All, Unigene18597_All, Unigene19024_All, Unigene19340_All, Unigene19987_All, Unigene2078_All, Unigene2107_All, Unigene2312_All, Unigene2322_All, Unigene2660_All, Unigene2675_All, Unigene27_All, Unigene2928_All, Unigene3012_All, Unigene3019_All, Unigene3125_All, Unigene3132_All, Unigene3701_All, Unigene3771_All, Unigene3888_All, Unigene4100_All, Unigene4169_All, Unigene432_All, Unigene4342_All, Unigene4564_All, Unigene4626_All, Unigene4675_All, Unigene5060_All, Unigene5180_All, Unigene526_All, Unigene5338_All, Unigene5600_All, Unigene5637_All, Unigene5751_All, Unigene5801_All, Unigene6129_All, Unigene6425_All, Unigene6650_All, Unigene6673_All, Unigene6821_All, Unigene6833_All, Unigene6843_All, Unigene7135_All, Unigene7273_All, Unigene7275_All, Unigene7663_All, Unigene8049_All, Unigene8218_All, Unigene9227_All, Unigene923_All, Unigene9825_All |

|     |                                                 |                                                                                                                                                                                                                                                                                                                                                                                                                                                                                                                                                                                                                                                                                                                                                                                                                                                                                                                                                                                                                                                                                                                                                                                                                                                                                                                                                                                                                                                                                                                                                                                                                                                                                                                                                                                                                                                                                                                                                                                                                                                                                                                                                                                                                                                                                                                                                                                                                                                                                                                                                                                                                                                                                                                                                                                                                                                                                                                                                                                                                                                                                                                                                                                                                                                                                                                                                                                                                                                                                                                                                                                                                                                                                                                                                                                                                                                                                                                                                                                                                                                                                                                                                                                                                                                                                                                                                                                                                                                                                                                                                                                                                                                                                                                                                                                                                                                                                                                                                                                                                                                                                                                                                                                                                                                                                                                                                                                                                                                                                                                                                                                                                                                                                                                                                                                      |
|-----|-------------------------------------------------|--------------------------------------------------------------------------------------------------------------------------------------------------------------------------------------------------------------------------------------------------------------------------------------------------------------------------------------------------------------------------------------------------------------------------------------------------------------------------------------------------------------------------------------------------------------------------------------------------------------------------------------------------------------------------------------------------------------------------------------------------------------------------------------------------------------------------------------------------------------------------------------------------------------------------------------------------------------------------------------------------------------------------------------------------------------------------------------------------------------------------------------------------------------------------------------------------------------------------------------------------------------------------------------------------------------------------------------------------------------------------------------------------------------------------------------------------------------------------------------------------------------------------------------------------------------------------------------------------------------------------------------------------------------------------------------------------------------------------------------------------------------------------------------------------------------------------------------------------------------------------------------------------------------------------------------------------------------------------------------------------------------------------------------------------------------------------------------------------------------------------------------------------------------------------------------------------------------------------------------------------------------------------------------------------------------------------------------------------------------------------------------------------------------------------------------------------------------------------------------------------------------------------------------------------------------------------------------------------------------------------------------------------------------------------------------------------------------------------------------------------------------------------------------------------------------------------------------------------------------------------------------------------------------------------------------------------------------------------------------------------------------------------------------------------------------------------------------------------------------------------------------------------------------------------------------------------------------------------------------------------------------------------------------------------------------------------------------------------------------------------------------------------------------------------------------------------------------------------------------------------------------------------------------------------------------------------------------------------------------------------------------------------------------------------------------------------------------------------------------------------------------------------------------------------------------------------------------------------------------------------------------------------------------------------------------------------------------------------------------------------------------------------------------------------------------------------------------------------------------------------------------------------------------------------------------------------------------------------------------------------------------------------------------------------------------------------------------------------------------------------------------------------------------------------------------------------------------------------------------------------------------------------------------------------------------------------------------------------------------------------------------------------------------------------------------------------------------------------------------------------------------------------------------------------------------------------------------------------------------------------------------------------------------------------------------------------------------------------------------------------------------------------------------------------------------------------------------------------------------------------------------------------------------------------------------------------------------------------------------------------------------------------------------------------------------------------------------------------------------------------------------------------------------------------------------------------------------------------------------------------------------------------------------------------------------------------------------------------------------------------------------------------------------------------------------------------------------------------------------------------------------------------------------|
| 232 | <a href="#">Lysosome</a>                        | CL1004.Contig1_All, CL106.Contig35_All, CL1098.Contig1_All, CL1166.Contig1_All, CL1166.Contig2_All, CL1210.Contig2_All, CL1225.Contig6_All, CL1257.Contig10_All, CL1257.Contig11_All, CL1257.Contig12_All, CL1257.Contig1_All, CL1257.Contig2_All, CL1257.Contig3_All, CL1257.Contig4_All, CL1257.Contig6_All, CL1257.Contig8_All, CL1300.Contig1_All, CL1300.Contig2_All, CL1300.Contig5_All, CL1300.Contig7_All, CL1323.Contig3_All, CL1341.Contig2_All, CL1358.Contig1_All, CL1358.Contig2_All, CL1358.Contig3_All, CL1382.Contig6_All, CL151.Contig1_All, CL151.Contig2_All, CL151.Contig4_All, CL1537.Contig1_All, CL1537.Contig2_All, CL1557.Contig1_All, CL1557.Contig2_All, CL1565.Contig1_All, CL1580.Contig1_All, CL1591.Contig2_All, CL161.Contig4_All, CL1614.Contig6_All, CL1724.Contig1_All, CL1750.Contig1_All, CL2011.Contig1_All, CL2019.Contig1_All, CL2019.Contig2_All, CL2028.Contig1_All, CL2028.Contig2_All, CL2037.Contig5_All, CL2140.Contig1_All, CL2150.Contig3_All, CL2171.Contig2_All, CL2240.Contig1_All, CL2267.Contig1_All, CL2277.Contig2_All, CL2277.Contig3_All, CL228.Contig11_All, CL228.Contig1_All, CL228.Contig6_All, CL2328.Contig1_All, CL2351.Contig1_All, CL2351.Contig2_All, CL2362.Contig1_All, CL2362.Contig2_All, CL247.Contig1_All, CL247.Contig2_All, CL2547.Contig2_All, CL2634.Contig1_All, CL2634.Contig2_All, CL2704.Contig1_All, CL3049.Contig2_All, CL3049.Contig3_All, CL3091.Contig1_All, CL3091.Contig2_All, CL3091.Contig3_All, CL3091.Contig4_All, CL3119.Contig1_All, CL3119.Contig2_All, CL3293.Contig1_All, CL3302.Contig2_All, CL3351.Contig2_All, CL3706.Contig1_All, CL3865.Contig2_All, CL388.Contig1_All, CL3884.Contig2_All, CL3897.Contig1_All, CL3965.Contig1_All, CL3965.Contig2_All, CL3965.Contig4_All, CL4033.Contig1_All, CL4057.Contig1_All, CL4090.Contig2_All, CL4259.Contig1_All, CL4259.Contig2_All, CL4272.Contig2_All, CL4276.Contig2_All, CL4294.Contig1_All, CL4294.Contig2_All, CL432.Contig3_All, CL432.Contig4_All, CL432.Contig6_All, CL4337.Contig3_All, CL4337.Contig6_All, CL4393.Contig1_All, CL4393.Contig2_All, CL4413.Contig2_All, CL4459.Contig1_All, CL4485.Contig1_All, CL4485.Contig3_All, CL4562.Contig2_All, CL4576.Contig1_All, CL4602.Contig1_All, CL4605.Contig1_All, CL4605.Contig2_All, CL4617.Contig2_All, CL4673.Contig1_All, CL4673.Contig2_All, CL4673.Contig4_All, CL484.Contig1_All, CL497.Contig1_All, CL497.Contig2_All, CL497.Contig3_All, CL5019.Contig2_All, CL504.Contig1_All, CL504.Contig2_All, CL5135.Contig1_All, CL5135.Contig2_All, CL5353.Contig1_All, CL5353.Contig2_All, CL5395.Contig1_All, CL5395.Contig2_All, CL5403.Contig2_All, CL5407.Contig1_All, CL5407.Contig2_All, CL548.Contig1_All, CL785.Contig1_All, CL829.Contig1_All, CL829.Contig2_All, CL862.Contig1_All, Unigene10007_All, Unigene10026_All, Unigene10129_All, Unigene10162_All, Unigene10170_All, Unigene10296_All, Unigene10452_All, Unigene10483_All, Unigene10507_All, Unigene1051_All, Unigene10709_All, Unigene10977_All, Unigene10982_All, Unigene10994_All, Unigene11166_All, Unigene11282_All, Unigene11360_All, Unigene11361_All, Unigene11488_All, Unigene11513_All, Unigene11553_All, Unigene11554_All, Unigene11633_All, Unigene11660_All, Unigene11863_All, Unigene11865_All, Unigene11876_All, Unigene11879_All, Unigene11891_All, Unigene11925_All, Unigene11971_All, Unigene12028_All, Unigene12148_All, Unigene12170_All, Unigene12172_All, Unigene12209_All, Unigene12302_All, Unigene12447_All, Unigene12455_All, Unigene12508_All, Unigene12634_All, Unigene12736_All, Unigene12840_All, Unigene12922_All, Unigene12923_All, Unigene12973_All, Unigene13219_All, Unigene13225_All, Unigene13324_All, Unigene13624_All, Unigene13978_All, Unigene15238_All, Unigene15239_All, Unigene15243_All, Unigene15494_All, Unigene15726_All, Unigene16264_All, Unigene16438_All, Unigene164_All, Unigene16993_All, Unigene17327_All, Unigene17368_All, Unigene1741_All, Unigene17470_All, Unigene17889_All, Unigene17953_All, Unigene18095_All, Unigene18114_All, Unigene18189_All, Unigene18288_All, Unigene18675_All, Unigene18707_All, Unigene1895_All, Unigene1913_All, Unigene1922_All, Unigene19672_All, Unigene2074_All, Unigene2096_All, Unigene2160_All, Unigene2270_All, Unigene2281_All, Unigene244_All, Unigene2699_All, Unigene2905_All, Unigene2959_All, Unigene2961_All, Unigene2982_All, Unigene3043_All, Unigene313_All, Unigene3157_All, Unigene3159_All, Unigene3297_All, Unigene3483_All, Unigene3651_All, Unigene3730_All, Unigene391_All, Unigene3982_All, Unigene4060_All, Unigene4103_All, Unigene4148_All, Unigene4155_All, Unigene4326_All, Unigene44_All, Unigene462_All, Unigene4637_All, Unigene4846_All, Unigene4866_All, Unigene4873_All, Unigene4921_All, Unigene5110_All, Unigene5111_All, Unigene5187_All, Unigene5193_All, Unigene5266_All, Unigene5429_All, Unigene55_All, Unigene5639_All, Unigene5646_All, Unigene5713_All, Unigene5716_All, Unigene5774_All, Unigene5890_All, Unigene5923_All, Unigene5935_All, Unigene6034_All, Unigene6173_All, Unigene6207_All, Unigene624_All, Unigene646_All, Unigene6692_All, Unigene6707_All, Unigene6915_All, Unigene7078_All, Unigene712_All, Unigene7134_All, Unigene7642_All, Unigene7665_All, Unigene7734_All, Unigene7751_All, Unigene7757_All, Unigene7873_All, Unigene7979_All, Unigene8011_All, Unigene8065_All, Unigene8079_All, Unigene8139_All, Unigene813_All, Unigene8167_All, Unigene8504_All, Unigene850_All, Unigene8540_All, Unigene860_All, Unigene8739_All, Unigene8973_All, Unigene9034_All, Unigene9058_All, Unigene9141_All, Unigene9251_All, Unigene925_All, Unigene9260_All, Unigene9314_All, Unigene962_All, Unigene9636_All, Unigene9928_All, Unigene9946_All |
|     |                                                 | CL1666.Contig1_All, CL1666.Contig2_All, CL2557.Contig1_All, CL2562.Contig2_All, CL280.Contig1_All, CL3128.Contig2_All, CL40.Contig10_All, CL40.Contig1_All, CL40.Contig2_All, CL40.Contig6_All, CL4358.Contig1_All, CL959.Contig1_All, Unigene10315_All, Unigene10364_All, Unigene10383_All, Unigene11782_All, Unigene11826_All, Unigene11830_All, Unigene11894_All, Unigene12066_All, Unigene12236_All, Unigene12245_All, Unigene12554_All, Unigene13470_All, Unigene13671_All, Unigene1538_All, Unigene15674_All, Unigene17838_All, Unigene17873_All, Unigene17957_All, Unigene18248_All, Unigene19184_All, Unigene19580_All, Unigene20815_All, Unigene2257_All, Unigene2496_All, Unigene3105_All, Unigene3281_All, Unigene4011_All, Unigene4267_All, Unigene4967_All, Unigene6258_All, Unigene627_All, Unigene6526_All, Unigene6913_All, Unigene6954_All, Unigene7271_All, Unigene7656_All, Unigene7735_All, Unigene8732_All, Unigene8994_All, Unigene9090_All, Unigene9826_All                                                                                                                                                                                                                                                                                                                                                                                                                                                                                                                                                                                                                                                                                                                                                                                                                                                                                                                                                                                                                                                                                                                                                                                                                                                                                                                                                                                                                                                                                                                                                                                                                                                                                                                                                                                                                                                                                                                                                                                                                                                                                                                                                                                                                                                                                                                                                                                                                                                                                                                                                                                                                                                                                                                                                                                                                                                                                                                                                                                                                                                                                                                                                                                                                                                                                                                                                                                                                                                                                                                                                                                                                                                                                                                                                                                                                                                                                                                                                                                                                                                                                                                                                                                                                                                                                                                                                                                                                                                                                                                                                                                                                                                                                                                                                                                                   |
| 233 | <a href="#">Fructose and mannose metabolism</a> |                                                                                                                                                                                                                                                                                                                                                                                                                                                                                                                                                                                                                                                                                                                                                                                                                                                                                                                                                                                                                                                                                                                                                                                                                                                                                                                                                                                                                                                                                                                                                                                                                                                                                                                                                                                                                                                                                                                                                                                                                                                                                                                                                                                                                                                                                                                                                                                                                                                                                                                                                                                                                                                                                                                                                                                                                                                                                                                                                                                                                                                                                                                                                                                                                                                                                                                                                                                                                                                                                                                                                                                                                                                                                                                                                                                                                                                                                                                                                                                                                                                                                                                                                                                                                                                                                                                                                                                                                                                                                                                                                                                                                                                                                                                                                                                                                                                                                                                                                                                                                                                                                                                                                                                                                                                                                                                                                                                                                                                                                                                                                                                                                                                                                                                                                                                      |

|     |                                                                            |                                                                                                                                                                                                                                                                                                                                                                                                                                                                                                                                                                                                                                                                                                                                                                                                                                                                                                                                                                                       |
|-----|----------------------------------------------------------------------------|---------------------------------------------------------------------------------------------------------------------------------------------------------------------------------------------------------------------------------------------------------------------------------------------------------------------------------------------------------------------------------------------------------------------------------------------------------------------------------------------------------------------------------------------------------------------------------------------------------------------------------------------------------------------------------------------------------------------------------------------------------------------------------------------------------------------------------------------------------------------------------------------------------------------------------------------------------------------------------------|
| 234 | <a href="#">Amino sugar and nucleotide sugar metabolism</a>                | CL1371.Contig2_All, CL1666.Contig1_All, CL1666.Contig2_All, CL2145.Contig2_All, CL2232.Contig2_All, CL2417.Contig1_All, CL2471.Contig3_All, CL2543.Contig2_All, CL2808.Contig1_All, CL3053.Contig1_All, CL3128.Contig2_All, CL3965.Contig1_All, CL3965.Contig2_All, CL3965.Contig4_All, Unigene10131_All, Unigene10204_All, Unigene10205_All, Unigene10535_All, Unigene11617_All, Unigene11944_All, Unigene11954_All, Unigene12327_All, Unigene12402_All, Unigene12466_All, Unigene12731_All, Unigene12955_All, Unigene13174_All, Unigene13375_All, Unigene13557_All, Unigene15981_All, Unigene16591_All, Unigene16824_All, Unigene17282_All, Unigene17953_All, Unigene18003_All, Unigene18004_All, Unigene18239_All, Unigene20387_All, Unigene20586_All, Unigene2202_All, Unigene2291_All, Unigene2709_All, Unigene4136_All, Unigene5131_All, Unigene5646_All, Unigene7656_All, Unigene7658_All, Unigene8039_All, Unigene8121_All, Unigene9022_All, Unigene9260_All, Unigene9314_All |
| 235 | <a href="#">Mismatch repair</a>                                            | CL120.Contig2_All, CL2986.Contig2_All, CL4989.Contig1_All, CL4989.Contig2_All, CL91.Contig1_All, Unigene10181_All, Unigene10182_All, Unigene10261_All, Unigene10838_All, Unigene12220_All, Unigene12361_All, Unigene18761_All, Unigene1947_All, Unigene2890_All, Unigene4102_All, Unigene7649_All, Unigene8228_All, Unigene8709_All                                                                                                                                                                                                                                                                                                                                                                                                                                                                                                                                                                                                                                                   |
| 236 | <a href="#">Sphingolipid metabolism</a>                                    | CL1300.Contig1_All, CL1300.Contig2_All, CL1300.Contig5_All, CL1300.Contig7_All, CL148.Contig2_All, CL148.Contig3_All, CL1670.Contig1_All, CL1724.Contig1_All, CL2259.Contig1_All, CL2280.Contig1_All, CL2525.Contig4_All, CL3292.Contig1_All, CL3292.Contig2_All, CL344.Contig1_All, CL4337.Contig3_All, CL4337.Contig6_All, CL4845.Contig1_All, CL4889.Contig2_All, CL5403.Contig2_All, CL885.Contig2_All, CL920.Contig13_All, CL920.Contig15_All, CL920.Contig1_All, Unigene10129_All, Unigene4342_All, Unigene5773_All, Unigene6034_All, Unigene692_All, Unigene7936_All, Unigene8139_All, Unigene8167_All                                                                                                                                                                                                                                                                                                                                                                         |
| 237 | <a href="#">Glycosphingolipid biosynthesis - lacto and neolacto series</a> | CL2562.Contig2_All, CL2708.Contig2_All, CL629.Contig1_All, CL629.Contig6_All, Unigene16539_All, Unigene2204_All, Unigene4758_All, Unigene5023_All, Unigene6258_All, Unigene6913_All, Unigene7057_All, Unigene8059_All, Unigene8994_All, Unigene9333_All, Unigene9826_All                                                                                                                                                                                                                                                                                                                                                                                                                                                                                                                                                                                                                                                                                                              |
| 238 | <a href="#">Cysteine and methionine metabolism</a>                         | CL1486.Contig3_All, CL2429.Contig1_All, CL2671.Contig2_All, CL305.Contig2_All, CL3127.Contig1_All, CL33.Contig1_All, CL4152.Contig2_All, CL5338.Contig2_All, CL57.Contig2_All, CL970.Contig2_All, Unigene10190_All, Unigene10191_All, Unigene11180_All, Unigene11181_All, Unigene11182_All, Unigene11226_All, Unigene11336_All, Unigene12140_All, Unigene12308_All, Unigene12475_All, Unigene12541_All, Unigene12544_All, Unigene12560_All, Unigene12760_All, Unigene12843_All, Unigene13121_All, Unigene14063_All, Unigene15509_All, Unigene15510_All, Unigene17244_All, Unigene18999_All, Unigene20111_All, Unigene20765_All, Unigene2208_All, Unigene2512_All, Unigene3252_All, Unigene5758_All, Unigene6046_All, Unigene6358_All, Unigene6831_All, Unigene6894_All, Unigene7717_All, Unigene9262_All, Unigene9716_All                                                                                                                                                             |
| 239 | <a href="#">Linoleic acid metabolism</a>                                   | CL1711.Contig3_All, CL199.Contig1_All, CL2432.Contig2_All, CL2590.Contig1_All, CL39.Contig1_All, CL39.Contig2_All, CL39.Contig3_All, CL39.Contig4_All, CL464.Contig8_All, CL5310.Contig2_All, CL731.Contig1_All, CL860.Contig10_All, CL860.Contig8_All, CL860.Contig9_All, Unigene10315_All, Unigene1134_All, Unigene12236_All, Unigene12245_All, Unigene12937_All, Unigene18521_All, Unigene19987_All, Unigene2078_All, Unigene2257_All, Unigene2675_All, Unigene2724_All, Unigene3029_All, Unigene3033_All, Unigene3034_All, Unigene3036_All, Unigene3037_All, Unigene3042_All, Unigene3281_All, Unigene4011_All, Unigene4884_All, Unigene4967_All, Unigene7135_All, Unigene7239_All, Unigene9090_All                                                                                                                                                                                                                                                                               |
| 240 | <a href="#">Colorectal cancer</a>                                          | CL1066.Contig1_All, CL1066.Contig2_All, CL1066.Contig3_All, CL120.Contig2_All, CL1439.Contig1_All, CL1439.Contig2_All, CL1535.Contig3_All, CL1843.Contig3_All, CL2573.Contig2_All, CL2573.Contig3_All, CL2788.Contig2_All, CL2882.Contig1_All, CL2882.Contig2_All, CL367.Contig1_All, CL367.Contig2_All, CL367.Contig3_All, CL4271.Contig1_All, CL4439.Contig2_All, CL4736.Contig1_All, CL4736.Contig2_All, CL4787.Contig1_All, CL5115.Contig1_All, CL695.Contig16_All, Unigene11307_All, Unigene11724_All, Unigene11922_All, Unigene12188_All, Unigene12671_All, Unigene13476_All, Unigene1479_All, Unigene150_All, Unigene17702_All, Unigene2050_All, Unigene220_All, Unigene236_All, Unigene247_All, Unigene2749_All, Unigene4581_All, Unigene4801_All, Unigene5727_All, Unigene5808_All, Unigene7297_All, Unigene777_All, Unigene783_All, Unigene824_All, Unigene8747_All, Unigene8784_All, Unigene8972_All, Unigene9050_All, Unigene9877_All                                     |
| 241 | <a href="#">Primary immunodeficiency</a>                                   | Unigene18195_All                                                                                                                                                                                                                                                                                                                                                                                                                                                                                                                                                                                                                                                                                                                                                                                                                                                                                                                                                                      |
| 242 | <a href="#">Iak-STAT signaling pathway</a>                                 | CL1066.Contig1_All, CL1066.Contig2_All, CL1066.Contig3_All, CL1225.Contig6_All, CL1807.Contig1_All, CL1807.Contig2_All, CL1953.Contig1_All, CL2038.Contig1_All, CL2038.Contig7_All, CL2170.Contig2_All, CL2170.Contig5_All, CL2222.Contig9_All, CL3460.Contig2_All, CL3460.Contig3_All, CL3632.Contig2_All, CL3632.Contig3_All, CL367.Contig1_All, CL367.Contig2_All, CL367.Contig3_All, CL695.Contig16_All, Unigene10174_All, Unigene1279_All, Unigene2749_All, Unigene3168_All, Unigene54_All, Unigene5781_All, Unigene6020_All, Unigene6916_All, Unigene8046_All, Unigene833_All, Unigene9738_All                                                                                                                                                                                                                                                                                                                                                                                  |
| 243 | <a href="#">Phenylalanine metabolism</a>                                   | CL1707.Contig1_All, CL238.Contig3_All, CL3127.Contig1_All, CL3599.Contig2_All, CL3643.Contig2_All, CL3643.Contig6_All, CL4176.Contig2_All, CL4451.Contig1_All, CL4451.Contig2_All, CL4594.Contig1_All, CL5197.Contig2_All, CL5288.Contig2_All, Unigene10773_All, Unigene11217_All, Unigene11218_All, Unigene11226_All, Unigene11336_All, Unigene1197_All, Unigene12183_All, Unigene12292_All, Unigene12475_All, Unigene13121_All, Unigene13410_All, Unigene13773_All, Unigene15509_All, Unigene15510_All, Unigene1623_All, Unigene18265_All, Unigene3134_All, Unigene3417_All, Unigene4098_All, Unigene417_All, Unigene4197_All, Unigene5053_All, Unigene5433_All, Unigene5996_All, Unigene6134_All, Unigene6360_All, Unigene6387_All, Unigene6674_All, Unigene9060_All                                                                                                                                                                                                               |
| 244 | <a href="#">Ether lipid metabolism</a>                                     | CL1624.Contig1_All, CL199.Contig1_All, CL2432.Contig2_All, CL2716.Contig2_All, CL3190.Contig2_All, CL344.Contig1_All, CL39.Contig1_All, CL39.Contig2_All, CL39.Contig3_All, CL39.Contig4_All, CL464.Contig8_All, CL4691.Contig2_All, CL4845.Contig1_All, CL5310.Contig2_All, CL5310.Contig10_All, CL860.Contig10_All, CL860.Contig8_All, CL860.Contig9_All, Unigene12214_All, Unigene12946_All, Unigene20289_All, Unigene2755_All, Unigene3029_All, Unigene3033_All, Unigene3034_All, Unigene3036_All, Unigene3037_All, Unigene3042_All, Unigene7018_All, Unigene7936_All                                                                                                                                                                                                                                                                                                                                                                                                             |

|     |                                                  |                                                                                                                                                                                                                                                                                                                                                                                                                                                                                                                                                                                                                                                                                                                                                                                                                                                                                                                                                                                                                                                                                                                                                                                                                                                                                                                                                                                                                                                                                                                                                                                                                                                                                                                                                                                                                                                                                                                                                                                                                                                                                                                                                                                                                                                                                                                                                                                                                                                                                                                                                                                                                                                                                                                                                                                             |
|-----|--------------------------------------------------|---------------------------------------------------------------------------------------------------------------------------------------------------------------------------------------------------------------------------------------------------------------------------------------------------------------------------------------------------------------------------------------------------------------------------------------------------------------------------------------------------------------------------------------------------------------------------------------------------------------------------------------------------------------------------------------------------------------------------------------------------------------------------------------------------------------------------------------------------------------------------------------------------------------------------------------------------------------------------------------------------------------------------------------------------------------------------------------------------------------------------------------------------------------------------------------------------------------------------------------------------------------------------------------------------------------------------------------------------------------------------------------------------------------------------------------------------------------------------------------------------------------------------------------------------------------------------------------------------------------------------------------------------------------------------------------------------------------------------------------------------------------------------------------------------------------------------------------------------------------------------------------------------------------------------------------------------------------------------------------------------------------------------------------------------------------------------------------------------------------------------------------------------------------------------------------------------------------------------------------------------------------------------------------------------------------------------------------------------------------------------------------------------------------------------------------------------------------------------------------------------------------------------------------------------------------------------------------------------------------------------------------------------------------------------------------------------------------------------------------------------------------------------------------------|
| 245 | <a href="#">Arachidonic acid metabolism</a>      | CL143.Contig1_All, CL143.Contig2_All, CL1584.Contig2_All, CL1711.Contig3_All, CL199.Contig1_All, CL2411.Contig1_All, CL2432.Contig2_All, CL2456.Contig3_All, CL2590.Contig1_All, CL2814.Contig1_All, CL3074.Contig2_All, CL3078.Contig1_All, CL317.Contig2_All, CL3554.Contig1_All, CL3618.Contig1_All, CL364.Contig1_All, CL3788.Contig1_All, CL39.Contig1_All, CL39.Contig2_All, CL39.Contig3_All, CL39.Contig4_All, CL4453.Contig1_All, CL450.Contig10_All, CL464.Contig8_All, CL4969.Contig1_All, CL5310.Contig2_All, CL5352.Contig1_All, CL5352.Contig2_All, CL731.Contig1_All, CL860.Contig10_All, CL860.Contig8_All, CL860.Contig9_All, Unigene10157_All, Unigene10887_All, Unigene1134_All, Unigene12008_All, Unigene12937_All, Unigene1385_All, Unigene13883_All, Unigene15435_All, Unigene15451_All, Unigene17640_All, Unigene17929_All, Unigene18521_All, Unigene20494_All, Unigene2078_All, Unigene2724_All, Unigene27_All, Unigene2914_All, Unigene3029_All, Unigene3033_All, Unigene3034_All, Unigene3036_All, Unigene3037_All, Unigene3042_All, Unigene432_All, Unigene4884_All, Unigene5870_All, Unigene5908_All, Unigene6118_All, Unigene6858_All, Unigene7135_All, Unigene7239_All, Unigene7548_All, Unigene8997_All, Unigene908_All, Unigene9950_All                                                                                                                                                                                                                                                                                                                                                                                                                                                                                                                                                                                                                                                                                                                                                                                                                                                                                                                                                                                                                                                                                                                                                                                                                                                                                                                                                                                                                                                                                                                     |
| 246 | <a href="#">alpha-Linolenic acid metabolism</a>  | CL1353.Contig1_All, CL1353.Contig3_All, CL1580.Contig1_All, CL1939.Contig1_All, CL199.Contig1_All, CL2432.Contig2_All, CL2433.Contig10_All, CL39.Contig1_All, CL39.Contig2_All, CL39.Contig3_All, CL39.Contig4_All, CL4602.Contig1_All, CL464.Contig8_All, CL4646.Contig2_All, CL5264.Contig2_All, CL5310.Contig2_All, CL860.Contig10_All, CL860.Contig8_All, CL860.Contig9_All, Unigene10157_All, Unigene10158_All, Unigene10311_All, Unigene11839_All, Unigene11862_All, Unigene11975_All, Unigene3029_All, Unigene3033_All, Unigene3034_All, Unigene3036_All, Unigene3037_All, Unigene3042_All, Unigene5713_All                                                                                                                                                                                                                                                                                                                                                                                                                                                                                                                                                                                                                                                                                                                                                                                                                                                                                                                                                                                                                                                                                                                                                                                                                                                                                                                                                                                                                                                                                                                                                                                                                                                                                                                                                                                                                                                                                                                                                                                                                                                                                                                                                                          |
| 247 | <a href="#">Vitamin digestion and absorption</a> | CL3666.Contig1_All, CL3666.Contig2_All, CL3866.Contig2_All, CL464.Contig8_All, CL4692.Contig1_All, CL4692.Contig2_All, CL4720.Contig2_All, CL4980.Contig1_All, Unigene16595_All, Unigene17100_All, Unigene171_All, Unigene17447_All, Unigene184_All, Unigene2054_All, Unigene4219_All, Unigene442_All, Unigene6002_All, Unigene7779_All, Unigene8662_All, Unigene9229_All, Unigene9251_All                                                                                                                                                                                                                                                                                                                                                                                                                                                                                                                                                                                                                                                                                                                                                                                                                                                                                                                                                                                                                                                                                                                                                                                                                                                                                                                                                                                                                                                                                                                                                                                                                                                                                                                                                                                                                                                                                                                                                                                                                                                                                                                                                                                                                                                                                                                                                                                                  |
| 248 | <a href="#">Other glycan degradation</a>         | CL106.Contig35_All, CL1382.Contig6_All, CL3049.Contig2_All, CL3049.Contig3_All, CL3965.Contig1_All, CL3965.Contig2_All, CL3965.Contig4_All, CL4270.Contig1_All, CL4270.Contig2_All, CL5403.Contig2_All, Unigene17953_All, Unigene5646_All, Unigene8167_All, Unigene850_All, Unigene918_All, Unigene9260_All, Unigene9314_All                                                                                                                                                                                                                                                                                                                                                                                                                                                                                                                                                                                                                                                                                                                                                                                                                                                                                                                                                                                                                                                                                                                                                                                                                                                                                                                                                                                                                                                                                                                                                                                                                                                                                                                                                                                                                                                                                                                                                                                                                                                                                                                                                                                                                                                                                                                                                                                                                                                                |
| 249 | <a href="#">Glycerolipid metabolism</a>          | CL1004.Contig1_All, CL127.Contig13_All, CL1580.Contig1_All, CL195.Contig2_All, CL2010.Contig1_All, CL2010.Contig2_All, CL2309.Contig2_All, CL2309.Contig3_All, CL2433.Contig10_All, CL2557.Contig1_All, CL2694.Contig1_All, CL2694.Contig3_All, CL344.Contig1_All, CL3463.Contig3_All, CL3578.Contig2_All, CL3578.Contig3_All, CL3578.Contig4_All, CL3897.Contig1_All, CL3897.Contig2_All, CL3966.Contig2_All, CL4144.Contig3_All, CL4144.Contig4_All, CL4451.Contig1_All, CL4451.Contig2_All, CL4485.Contig1_All, CL4485.Contig3_All, CL4602.Contig1_All, CL4753.Contig1_All, CL4845.Contig1_All, CL725.Contig1_All, CL88.Contig2_All, CL88.Contig3_All, Unigene10069_All, Unigene10282_All, Unigene10299_All, Unigene10526_All, Unigene10686_All, Unigene10908_All, Unigene1197_All, Unigene13410_All, Unigene13671_All, Unigene13773_All, Unigene15270_All, Unigene16206_All, Unigene16671_All, Unigene17527_All, Unigene17957_All, Unigene18101_All, Unigene18656_All, Unigene186_All, Unigene19038_All, Unigene20815_All, Unigene2496_All, Unigene3450_All, Unigene4873_All, Unigene5053_All, Unigene5266_All, Unigene5713_All, Unigene627_All, Unigene6360_All, Unigene6954_All, Unigene7271_All, Unigene7936_All, Unigene8065_All, Unigene8139_All, Unigene8719_All, Unigene8732_All, Unigene9188_All, Unigene9714_All                                                                                                                                                                                                                                                                                                                                                                                                                                                                                                                                                                                                                                                                                                                                                                                                                                                                                                                                                                                                                                                                                                                                                                                                                                                                                                                                                                                                                                                               |
| 250 | <a href="#">Bile secretion</a>                   | CL1049.Contig4_All, CL1176.Contig4_All, CL1364.Contig4_All, CL1452.Contig1_All, CL1746.Contig1_All, CL1746.Contig2_All, CL190.Contig1_All, CL197.Contig1_All, CL197.Contig2_All, CL197.Contig3_All, CL2137.Contig1_All, CL2137.Contig2_All, CL2308.Contig1_All, CL2370.Contig2_All, CL2370.Contig3_All, CL2370.Contig4_All, CL2474.Contig2_All, CL2854.Contig1_All, CL2894.Contig1_All, CL2894.Contig2_All, CL2894.Contig3_All, CL3030.Contig1_All, CL3030.Contig3_All, CL3160.Contig2_All, CL363.Contig2_All, CL3654.Contig1_All, CL3654.Contig2_All, CL3776.Contig2_All, CL4005.Contig2_All, CL4005.Contig3_All, CL41.Contig3_All, CL41.Contig4_All, CL41.Contig8_All, CL4110.Contig1_All, CL4110.Contig2_All, CL420.Contig1_All, CL420.Contig3_All, CL4262.Contig2_All, CL4334.Contig1_All, CL4334.Contig2_All, CL440.Contig3_All, CL440.Contig5_All, CL440.Contig6_All, CL4510.Contig1_All, CL4559.Contig2_All, CL4559.Contig3_All, CL4621.Contig2_All, CL4773.Contig1_All, CL4773.Contig2_All, CL490.Contig1_All, CL490.Contig2_All, CL490.Contig3_All, CL493.Contig2_All, CL5204.Contig1_All, CL5204.Contig2_All, CL5362.Contig2_All, CL5440.Contig1_All, CL720.Contig1_All, CL720.Contig4_All, CL744.Contig1_All, CL744.Contig2_All, CL798.Contig1_All, CL798.Contig2_All, CL798.Contig3_All, CL880.Contig3_All, CL940.Contig3_All, CL940.Contig5_All, CL974.Contig2_All, Unigene10058_All, Unigene10594_All, Unigene1120_All, Unigene11480_All, Unigene11482_All, Unigene11483_All, Unigene1170_All, Unigene11915_All, Unigene12297_All, Unigene12660_All, Unigene147_All, Unigene15946_All, Unigene17598_All, Unigene18028_All, Unigene18195_All, Unigene18366_All, Unigene18489_All, Unigene18766_All, Unigene19987_All, Unigene2002_All, Unigene2003_All, Unigene2029_All, Unigene2054_All, Unigene2107_All, Unigene2312_All, Unigene239_All, Unigene2660_All, Unigene2675_All, Unigene3010_All, Unigene3012_All, Unigene3125_All, Unigene3132_All, Unigene3701_All, Unigene3771_All, Unigene3779_All, Unigene3824_All, Unigene4112_All, Unigene4211_All, Unigene4323_All, Unigene4342_All, Unigene4532_All, Unigene4537_All, Unigene4564_All, Unigene4675_All, Unigene4700_All, Unigene4_All, Unigene526_All, Unigene5637_All, Unigene5724_All, Unigene5751_All, Unigene5768_All, Unigene5_All, Unigene6104_All, Unigene6129_All, Unigene6215_All, Unigene6639_All, Unigene6650_All, Unigene6673_All, Unigene690_All, Unigene6936_All, Unigene695_All, Unigene6_All, Unigene7006_All, Unigene7061_All, Unigene7206_All, Unigene784_All, Unigene7_All, Unigene8049_All, Unigene8218_All, Unigene8464_All, Unigene8910_All, Unigene9025_All, Unigene9078_All, Unigene9163_All, Unigene9227_All, Unigene9251_All, Unigene93_All, Unigene9523_All, Unigene9668_All, Unigene9733_All |

|     |                                                 |                                                                                                                                                                                                                                                                                                                                                                                                                                                                                                                                                                                                                                                                                                                                                                                                                                                                                                                                                                                                                                                                                                                                                                                                                                                                                                                                                                                                                                                                                                                                                                                                                                                                                                                                                                                                                                                                                                                                                                                                                                                                                                                                                                                                                                                                                               |
|-----|-------------------------------------------------|-----------------------------------------------------------------------------------------------------------------------------------------------------------------------------------------------------------------------------------------------------------------------------------------------------------------------------------------------------------------------------------------------------------------------------------------------------------------------------------------------------------------------------------------------------------------------------------------------------------------------------------------------------------------------------------------------------------------------------------------------------------------------------------------------------------------------------------------------------------------------------------------------------------------------------------------------------------------------------------------------------------------------------------------------------------------------------------------------------------------------------------------------------------------------------------------------------------------------------------------------------------------------------------------------------------------------------------------------------------------------------------------------------------------------------------------------------------------------------------------------------------------------------------------------------------------------------------------------------------------------------------------------------------------------------------------------------------------------------------------------------------------------------------------------------------------------------------------------------------------------------------------------------------------------------------------------------------------------------------------------------------------------------------------------------------------------------------------------------------------------------------------------------------------------------------------------------------------------------------------------------------------------------------------------|
| 251 | <a href="#">Adipocytokine signaling pathway</a> | CL1009.Contig1_All, CL1049.Contig4_All, CL1091.Contig14_All, CL2222.Contig9_All, CL2430.Contig3_All, CL2843.Contig2_All, CL2943.Contig1_All, CL2943.Contig2_All, CL3047.Contig1_All, CL3047.Contig2_All, CL3112.Contig3_All, CL3536.Contig1_All, CL3536.Contig2_All, CL3536.Contig5_All, CL3796.Contig2_All, CL3796.Contig3_All, CL3832.Contig1_All, CL408.Contig1_All, CL408.Contig3_All, CL408.Contig4_All, CL4510.Contig1_All, CL4855.Contig1_All, CL4855.Contig2_All, CL493.Contig2_All, CL507.Contig7_All, CL5115.Contig1_All, CL5158.Contig1_All, CL5158.Contig2_All, CL5204.Contig1_All, CL5204.Contig2_All, CL866.Contig1_All, CL866.Contig2_All, CL880.Contig3_All, Unigene10029_All, Unigene12660_All, Unigene12680_All, Unigene14046_All, Unigene16942_All, Unigene1757_All, Unigene20691_All, Unigene220_All, Unigene2749_All, Unigene3282_All, Unigene3836_All, Unigene5722_All, Unigene693_All, Unigene695_All, Unigene7046_All, Unigene706_All, Unigene761_All, Unigene8056_All, Unigene818_All                                                                                                                                                                                                                                                                                                                                                                                                                                                                                                                                                                                                                                                                                                                                                                                                                                                                                                                                                                                                                                                                                                                                                                                                                                                                                |
| 252 | <a href="#">Peroxisome</a>                      | CL1300.Contig4_All, CL1300.Contig6_All, CL1305.Contig1_All, CL1353.Contig1_All, CL1353.Contig3_All, CL1391.Contig2_All, CL1604.Contig2_All, CL1732.Contig1_All, CL1732.Contig2_All, CL1842.Contig1_All, CL1842.Contig3_All, CL2246.Contig3_All, CL2246.Contig6_All, CL2246.Contig8_All, CL257.Contig5_All, CL2846.Contig2_All, CL2943.Contig1_All, CL2943.Contig2_All, CL3114.Contig2_All, CL3158.Contig2_All, CL3158.Contig3_All, CL3212.Contig1_All, CL3315.Contig3_All, CL3315.Contig4_All, CL348.Contig1_All, CL348.Contig2_All, CL3536.Contig1_All, CL3536.Contig2_All, CL3536.Contig5_All, CL3581.Contig2_All, CL370.Contig1_All, CL3784.Contig1_All, CL3991.Contig1_All, CL4171.Contig1_All, CL4427.Contig2_All, CL4427.Contig3_All, CL4585.Contig1_All, CL46.Contig10_All, CL4646.Contig2_All, CL4686.Contig2_All, CL4700.Contig1_All, CL472.Contig5_All, CL507.Contig7_All, CL5341.Contig3_All, CL5411.Contig2_All, CL553.Contig2_All, CL580.Contig2_All, CL580.Contig3_All, CL584.Contig10_All, CL584.Contig15_All, CL584.Contig17_All, CL584.Contig1_All, CL584.Contig3_All, CL584.Contig4_All, CL584.Contig6_All, CL584.Contig7_All, CL818.Contig1_All, CL818.Contig2_All, CL866.Contig1_All, CL866.Contig2_All, Unigene10009_All, Unigene10157_All, Unigene10158_All, Unigene10311_All, Unigene10375_All, Unigene10418_All, Unigene10948_All, Unigene11412_All, Unigene11577_All, Unigene11816_All, Unigene11874_All, Unigene11969_All, Unigene12069_All, Unigene12175_All, Unigene12186_All, Unigene12214_All, Unigene12281_All, Unigene12359_All, Unigene12738_All, Unigene12763_All, Unigene12804_All, Unigene1280_All, Unigene12910_All, Unigene12946_All, Unigene13254_All, Unigene13270_All, Unigene13271_All, Unigene19880_All, Unigene20696_All, Unigene2945_All, Unigene3019_All, Unigene3305_All, Unigene3482_All, Unigene3689_All, Unigene3888_All, Unigene3936_All, Unigene4007_All, Unigene4100_All, Unigene5281_All, Unigene5834_All, Unigene6425_All, Unigene6518_All, Unigene6821_All, Unigene6833_All, Unigene6843_All, Unigene693_All, Unigene7046_All, Unigene7062_All, Unigene7273_All, Unigene7275_All, Unigene761_All, Unigene765_All, Unigene7989_All, Unigene818_All, Unigene826_All, Unigene8531_All, Unigene8704_All, Unigene8821_All, Unigene9724_All |



CL1.Contig1\_All, CL1000.Contig2\_All, CL1004.Contig1\_All, CL1070.Contig6\_All, CL1070.Contig7\_All, CL1135.Contig2\_All, CL1146.Contig2\_All, CL1146.Contig3\_All, CL1156.Contig3\_All, CL1175.Contig1\_All, CL1175.Contig2\_All, CL1176.Contig4\_All, CL1214.Contig2\_All, CL1258.Contig1\_All, CL1258.Contig2\_All, CL1260.Contig1\_All, CL127.Contig13\_All, CL1300.Contig1\_All, CL1300.Contig2\_All, CL1300.Contig4\_All, CL1300.Contig5\_All, CL1300.Contig6\_All, CL1300.Contig7\_All, CL1305.Contig1\_All, CL1313.Contig4\_All, CL1333.Contig1\_All, CL1333.Contig2\_All, CL134.Contig1\_All, CL1353.Contig1\_All, CL1353.Contig3\_All, CL1356.Contig1\_All, CL1356.Contig2\_All, CL137.Contig1\_All, CL137.Contig2\_All, CL1371.Contig1\_All, CL1388.Contig1\_All, CL1395.Contig2\_All, CL1404.Contig2\_All, CL1411.Contig1\_All, CL1411.Contig8\_All, CL1418.Contig6\_All, CL1418.Contig8\_All, CL143.Contig1\_All, CL143.Contig2\_All, CL1447.Contig2\_All, CL1478.Contig1\_All, CL1478.Contig2\_All, CL148.Contig2\_All, CL148.Contig3\_All, CL1484.Contig6\_All, CL1484.Contig7\_All, CL1486.Contig3\_All, CL15.Contig1\_All, CL15.Contig2\_All, CL15.Contig3\_All, CL1508.Contig1\_All, CL1508.Contig2\_All, CL151.Contig1\_All, CL151.Contig2\_All, CL151.Contig4\_All, CL1513.Contig1\_All, CL1521.Contig1\_All, CL1521.Contig2\_All, CL1521.Contig3\_All, CL1521.Contig5\_All, CL1531.Contig1\_All, CL1531.Contig2\_All, CL1531.Contig3\_All, CL1580.Contig1\_All, CL1584.Contig2\_All, CL1594.Contig1\_All, CL1599.Contig1\_All, CL1599.Contig2\_All, CL1604.Contig2\_All, CL1624.Contig1\_All, CL1666.Contig1\_All, CL1666.Contig2\_All, CL1670.Contig1\_All, CL1683.Contig2\_All, CL1683.Contig7\_All, CL1685.Contig2\_All, CL1711.Contig1\_All, CL1711.Contig2\_All, CL1711.Contig3\_All, CL1724.Contig1\_All, CL1737.Contig1\_All, CL1737.Contig2\_All, CL1780.Contig1\_All, CL1780.Contig2\_All, CL1798.Contig1\_All, CL1798.Contig2\_All, CL1838.Contig1\_All, CL1842.Contig1\_All, CL1842.Contig3\_All, CL1855.Contig1\_All, CL1868.Contig1\_All, CL1868.Contig2\_All, CL1868.Contig4\_All, CL1876.Contig1\_All, CL1879.Contig2\_All, CL1879.Contig3\_All, CL1879.Contig4\_All, CL1892.Contig1\_All, CL1892.Contig2\_All, CL1892.Contig3\_All, CL1892.Contig5\_All, CL1902.Contig2\_All, CL195.Contig2\_All, CL1961.Contig2\_All, CL199.Contig1\_All, CL1990.Contig1\_All, CL1990.Contig2\_All, CL1995.Contig1\_All, CL1995.Contig2\_All, CL1995.Contig3\_All, CL1997.Contig2\_All, CL2010.Contig1\_All, CL2010.Contig2\_All, CL2017.Contig4\_All, CL2017.Contig5\_All, CL2035.Contig1\_All, CL2035.Contig4\_All, CL2053.Contig1\_All, CL2053.Contig2\_All, CL2128.Contig1\_All, CL2145.Contig2\_All, CL2150.Contig3\_All, CL2164.Contig1\_All, CL2164.Contig2\_All, CL2220.Contig1\_All, CL2220.Contig2\_All, CL2246.Contig3\_All, CL2246.Contig6\_All, CL2246.Contig8\_All, CL2259.Contig1\_All, CL2272.Contig1\_All, CL2280.Contig1\_All, CL2294.Contig4\_All, CL2305.Contig1\_All, CL2305.Contig3\_All, CL2305.Contig5\_All, CL2308.Contig1\_All, CL2309.Contig2\_All, CL2309.Contig3\_All, CL2326.Contig1\_All, CL2326.Contig2\_All, CL2326.Contig3\_All, CL2326.Contig4\_All, CL2370.Contig2\_All, CL2370.Contig3\_All, CL2370.Contig4\_All, CL238.Contig3\_All, CL2386.Contig4\_All, CL2401.Contig1\_All, CL2406.Contig3\_All, CL2411.Contig1\_All, CL2417.Contig1\_All, CL2430.Contig3\_All, CL2432.Contig2\_All, CL2433.Contig10\_All, CL2445.Contig1\_All, CL2456.Contig3\_All, CL2471.Contig3\_All, CL2512.Contig2\_All, CL252.Contig2\_All, CL252.Contig3\_All, CL2525.Contig4\_All, CL2532.Contig1\_All, CL2533.Contig3\_All, CL2551.Contig1\_All, CL2557.Contig1\_All, CL2562.Contig2\_All, CL257.Contig5\_All, CL258.Contig1\_All, CL258.Contig2\_All, CL2590.Contig1\_All, CL2595.Contig1\_All, CL2604.Contig1\_All, CL2607.Contig1\_All, CL2607.Contig2\_All, CL2624.Contig4\_All, CL2626.Contig1\_All, CL2634.Contig1\_All, CL2634.Contig2\_All, CL2648.Contig3\_All, CL2671.Contig2\_All, CL2678.Contig1\_All, CL2678.Contig2\_All, CL2694.Contig1\_All, CL2694.Contig3\_All, CL27.Contig5\_All, CL2702.Contig1\_All, CL2702.Contig2\_All, CL2707.Contig1\_All, CL2708.Contig2\_All, CL2716.Contig2\_All, CL280.Contig1\_All, CL2814.Contig1\_All, CL2835.Contig2\_All, CL2835.Contig3\_All, CL2835.Contig4\_All, CL2846.Contig2\_All, CL2898.Contig1\_All, CL2898.Contig2\_All, CL2898.Contig3\_All, CL2930.Contig5\_All, CL2941.Contig1\_All, CL2943.Contig1\_All, CL2943.Contig2\_All, CL2944.Contig1\_All, CL2944.Contig2\_All, CL2951.Contig1\_All, CL2951.Contig4\_All, CL2951.Contig7\_All, CL2983.Contig1\_All, CL300.Contig7\_All, CL3006.Contig2\_All, CL3019.Contig2\_All, CL3019.Contig3\_All, CL3019.Contig4\_All, CL3028.Contig1\_All, CL3040.Contig1\_All, CL3074.Contig2\_All, CL3078.Contig1\_All, CL309.Contig2\_All, CL309.Contig3\_All, CL309.Contig4\_All, CL3091.Contig1\_All, CL3091.Contig2\_All, CL3091.Contig3\_All, CL3091.Contig4\_All, CL3107.Contig1\_All, CL3118.Contig1\_All, CL3118.Contig2\_All, CL3127.Contig1\_All, CL3128.Contig2\_All, CL3129.Contig1\_All, CL3129.Contig2\_All, CL3129.Contig5\_All, CL313.Contig2\_All, CL3135.Contig1\_All, CL3135.Contig2\_All, CL3135.Contig3\_All, CL3142.Contig1\_All, CL3142.Contig2\_All, CL3156.Contig1\_All, CL3158.Contig2\_All, CL3158.Contig3\_All, CL3163.Contig2\_All, CL317.Contig2\_All, CL3212.Contig1\_All, CL3228.Contig1\_All, CL3235.Contig1\_All, CL3235.Contig2\_All, CL3251.Contig1\_All, CL3251.Contig2\_All, CL3283.Contig1\_All, CL3292.Contig1\_All, CL3292.Contig2\_All, CL33.Contig1\_All, CL3314.Contig2\_All, CL3314.Contig4\_All, CL3315.Contig3\_All, CL3315.Contig4\_All, CL3364.Contig2\_All, CL3410.Contig1\_All, CL3410.Contig2\_All, CL3420.Contig1\_All, CL344.Contig1\_All, CL3453.Contig4\_All, CL3463.Contig3\_All, CL348.Contig1\_All, CL348.Contig2\_All, CL3497.Contig1\_All, CL3505.Contig2\_All, CL3511.Contig2\_All, CL3536.Contig1\_All, CL3536.Contig2\_All, CL3536.Contig5\_All, CL3554.Contig1\_All, CL3576.Contig1\_All, CL3578.Contig2\_All, CL3578.Contig3\_All, CL3578.Contig4\_All, CL3581.Contig2\_All, CL3599.Contig2\_All, CL3614.Contig1\_All, CL3614.Contig2\_All, CL3618.Contig1\_All, CL364.Contig1\_All, CL3650.Contig2\_All, CL3654.Contig1\_All, CL3654.Contig2\_All, CL3657.Contig1\_All, CL3657.Contig3\_All, CL3664.Contig1\_All, CL3664.Contig2\_All, CL3687.Contig1\_All, CL3687.Contig2\_All, CL370.Contig1\_All, CL372.Contig1\_All, CL3727.Contig1\_All, CL3730.Contig1\_All, CL3756.Contig1\_All, CL3756.Contig2\_All, CL3788.Contig1\_All, CL3792.Contig3\_All, CL3808.Contig2\_All, CL3832.Contig1\_All, CL3878.Contig2\_All, CL3884.Contig2\_All, CL3897.Contig1\_All, CL3897.Contig2\_All, CL39.Contig1\_All, CL39.Contig2\_All, CL39.Contig3\_All, CL39.Contig4\_All, CL3945.Contig4\_All, CL3945.Contig6\_All, CL3945.Contig8\_All, CL396.Contig25\_All, CL396.Contig26\_All, CL396.Contig28\_All, CL396.Contig29\_All, CL396.Contig30\_All, CL396.Contig31\_All, CL396.Contig33\_All, CL396.Contig34\_All, CL396.Contig35\_All, CL3963.Contig1\_All, CL3965.Contig1\_All, CL3965.Contig2\_All, CL3965.Contig4\_All, CL3966.Contig2\_All, CL3979.Contig1\_All, CL3979.Contig2\_All, CL3991.Contig1\_All, CL3994.Contig1\_All, CL4030.Contig3\_All, CL4030.Contig4\_All, CL4090.Contig2\_All, CL4091.Contig1\_All, CL4091.Contig2\_All, CL4110.Contig1\_All, CL4110.Contig2\_All, CL4130.Contig1\_All, CL4130.Contig2\_All, CL4132.Contig2\_All, CL4144.Contig3\_All, CL4144.Contig4\_All, CL4152.Contig2\_All, CL4171.Contig1\_All, CL4176.Contig2\_All, CL4195.Contig2\_All, CL4221.Contig1\_All, CL424.Contig1\_All, CL424.Contig2\_All, CL4256.Contig1\_All, CL4278.Contig2\_All, CL4304.Contig1\_All, CL4304.Contig2\_All, CL4337.Contig3\_All, CL4337.Contig6\_All, CL4346.Contig1\_All, CL4355.Contig1\_All, CL4355.Contig2\_All, CL4358.Contig1\_All, CL4365.Contig1\_All, CL4427.Contig2\_All, CL4427.Contig3\_All, CL443.Contig1\_All, CL4446.Contig1\_All, CL4446.Contig2\_All, CL4451.Contig1\_All, CL4451.Contig2\_All, CL4453.Contig1\_All, CL4459.Contig1\_All, CL4460.Contig1\_All, CL4482.Contig2\_All, CL4485.Contig1\_All, CL4485.Contig3\_All, CL450.Contig10\_All, CL4527.Contig1\_All, CL4527.Contig2\_All, CL4534.Contig2\_All, CL4534.Contig3\_All, CL4570.Contig1\_All, CL4585.Contig1\_All, CL4594.Contig1\_All, CL4602.Contig1\_All, CL464.Contig8\_All, CL4646.Contig2\_All, CL4659.Contig1\_All, CL4663.Contig1\_All, CL4673.Contig1\_All, CL4673.Contig2\_All, CL4673.Contig4\_All, CL4686.Contig2\_All, CL4691.Contig2\_All, CL4700.Contig1\_All, CL4753.Contig1\_All, CL4773.Contig1\_All, CL4773.Contig2\_All, CL4790.Contig1\_All, CL4790.Contig2\_All, CL4845.Contig1\_All, CL485.Contig1\_All, CL485.Contig2\_All, CL4850.Contig1\_All, CL4850.Contig3\_All, CL4872.Contig1\_All, CL4872.Contig2\_All, CL4873.Contig2\_All, CL4881.Contig2\_All, CL4883.Contig1\_All, CL



---

|     |                                                |                                                                                                                                                                                                                                                                                                                                                                                                                                                                                                                                                                                                                                                                                                                                                                                                                                                                                                                                                                                                                                                                                                                                                                                                                                                                                                                                                                                                                                                                                                                                   |
|-----|------------------------------------------------|-----------------------------------------------------------------------------------------------------------------------------------------------------------------------------------------------------------------------------------------------------------------------------------------------------------------------------------------------------------------------------------------------------------------------------------------------------------------------------------------------------------------------------------------------------------------------------------------------------------------------------------------------------------------------------------------------------------------------------------------------------------------------------------------------------------------------------------------------------------------------------------------------------------------------------------------------------------------------------------------------------------------------------------------------------------------------------------------------------------------------------------------------------------------------------------------------------------------------------------------------------------------------------------------------------------------------------------------------------------------------------------------------------------------------------------------------------------------------------------------------------------------------------------|
| 254 | <a href="#">Glycerophospholipid metabolism</a> | CL1260.Contig1_All, CL127.Contig13_All, CL1545.Contig1_All, CL1580.Contig1_All, CL195.Contig2_All, CL199.Contig1_All, CL2010.Contig1_All, CL2010.Contig2_All, CL2432.Contig2_All, CL2433.Contig10_All, CL2951.Contig1_All, CL2951.Contig4_All, CL2951.Contig7_All, CL3314.Contig2_All, CL3314.Contig4_All, CL344.Contig1_All, CL3463.Contig3_All, CL3578.Contig2_All, CL3578.Contig3_All, CL3578.Contig4_All, CL3818.Contig1_All, CL39.Contig1_All, CL39.Contig2_All, CL39.Contig3_All, CL39.Contig4_All, CL3966.Contig2_All, CL4197.Contig1_All, CL4197.Contig2_All, CL4489.Contig1_All, CL46.Contig10_All, CL4602.Contig1_All, CL464.Contig8_All, CL4691.Contig2_All, CL4845.Contig1_All, CL5122.Contig1_All, CL5122.Contig2_All, CL5125.Contig1_All, CL5291.Contig1_All, CL5310.Contig2_All, CL5315.Contig1_All, CL608.Contig2_All, CL608.Contig3_All, CL725.Contig1_All, CL860.Contig10_All, CL860.Contig8_All, CL860.Contig9_All, Unigene10633_All, Unigene11326_All, Unigene11327_All, Unigene11397_All, Unigene12266_All, Unigene12719_All, Unigene1290_All, Unigene12945_All, Unigene12985_All, Unigene13320_All, Unigene14369_All, Unigene18833_All, Unigene2072_All, Unigene2199_All, Unigene3029_All, Unigene3033_All, Unigene3034_All, Unigene3036_All, Unigene3037_All, Unigene3042_All, Unigene3362_All, Unigene4096_All, Unigene4741_All, Unigene5713_All, Unigene6060_All, Unigene7018_All, Unigene7023_All, Unigene7897_All, Unigene7936_All, Unigene8643_All, Unigene8727_All, Unigene9188_All, Unigene9644_All |
|-----|------------------------------------------------|-----------------------------------------------------------------------------------------------------------------------------------------------------------------------------------------------------------------------------------------------------------------------------------------------------------------------------------------------------------------------------------------------------------------------------------------------------------------------------------------------------------------------------------------------------------------------------------------------------------------------------------------------------------------------------------------------------------------------------------------------------------------------------------------------------------------------------------------------------------------------------------------------------------------------------------------------------------------------------------------------------------------------------------------------------------------------------------------------------------------------------------------------------------------------------------------------------------------------------------------------------------------------------------------------------------------------------------------------------------------------------------------------------------------------------------------------------------------------------------------------------------------------------------|

---

**Table S6.** KEGG pathway enrichment analysis of differentially expressed proteins in high virulence (Bm5) and low virulence (Bm7) *Bursaphelenchus mucronarius* isolates.

| #  | Pathway                                             | Sample1 (1118) | Sample2 (3776) | p-Value                | Pathway ID |
|----|-----------------------------------------------------|----------------|----------------|------------------------|------------|
| 1  | Metabolic pathways                                  | 444            | 1119           | $2.96 \times 10^{-18}$ | ko01100    |
| 2  | Valine, leucine and isoleucine degradation          | 61             | 111            | $1.38 \times 10^{-8}$  | ko00280    |
| 3  | Glycolysis/Gluconeogenesis                          | 67             | 134            | $3.60 \times 10^{-7}$  | ko00010    |
| 4  | Fatty acid metabolism                               | 67             | 136            | $7.27 \times 10^{-7}$  | ko00071    |
| 5  | Pyruvate metabolism                                 | 51             | 98             | $2.05 \times 10^{-6}$  | ko00620    |
| 6  | Citrate cycle (TCA cycle)                           | 42             | 76             | $2.17 \times 10^{-6}$  | ko00020    |
| 7  | beta-Alanine metabolism                             | 38             | 70             | $1.17 \times 10^{-6}$  | ko00410    |
| 8  | Aminoacyl-tRNA biosynthesis                         | 26             | 42             | $1.28 \times 10^{-5}$  | ko00970    |
| 9  | Oxidative phosphorylation                           | 71             | 160            | $3.71 \times 10^{-5}$  | ko00190    |
| 10 | Propanoate metabolism                               | 42             | 84             | $5.73 \times 10^{-5}$  | ko00640    |
| 11 | Parkinson's disease                                 | 63             | 150            | $6.58 \times 10^{-4}$  | ko05012    |
| 12 | Peroxisome                                          | 71             | 174            | $8.22 \times 10^{-4}$  | ko04146    |
| 13 | Alzheimer's disease                                 | 67             | 167            | $1.93 \times 10^{-3}$  | ko05010    |
| 14 | Butanoate metabolism                                | 28             | 58             | $1.94 \times 10^{-3}$  | ko00650    |
| 15 | Retinol metabolism                                  | 48             | 113            | $2.12 \times 10^{-3}$  | ko00830    |
| 16 | Tryptophan metabolism                               | 41             | 94             | $2.44 \times 10^{-3}$  | ko00380    |
| 17 | Galactose metabolism                                | 21             | 41             | $2.85 \times 10^{-3}$  | ko00052    |
| 18 | Huntington's disease                                | 72             | 184            | $2.89 \times 10^{-3}$  | ko05016    |
| 19 | Arginine and proline metabolism                     | 40             | 92             | $2.94 \times 10^{-3}$  | ko00330    |
| 20 | Glyoxylate and dicarboxylate metabolism             | 23             | 47             | $3.88 \times 10^{-3}$  | ko00630    |
| 21 | PPAR signaling pathway                              | 29             | 63             | $3.98 \times 10^{-3}$  | ko03320    |
| 22 | Metabolism of xenobiotics by cytochrome P450        | 48             | 116            | $4.01 \times 10^{-3}$  | ko00980    |
| 23 | Pentose phosphate pathway                           | 23             | 48             | $5.41 \times 10^{-3}$  | ko00030    |
| 24 | Drug metabolism—cytochrome P450                     | 44             | 107            | $6.58 \times 10^{-3}$  | ko00982    |
| 25 | Lysine degradation                                  | 27             | 60             | $7.82 \times 10^{-3}$  | ko00310    |
| 26 | Biosynthesis of unsaturated fatty acids             | 17             | 34             | $9.56 \times 10^{-3}$  | ko01040    |
| 27 | Glutathione metabolism                              | 40             | 98             | $1.07 \times 10^{-2}$  | ko00480    |
| 28 | Phenylalanine metabolism                            | 26             | 59             | $1.23 \times 10^{-2}$  | ko00360    |
| 29 | Glycerolipid metabolism                             | 26             | 59             | $1.23 \times 10^{-2}$  | ko00561    |
| 30 | Starch and sucrose metabolism                       | 22             | 49             | $1.60 \times 10^{-2}$  | ko00500    |
| 31 | Synthesis and degradation of ketone bodies          | 7              | 11             | $1.99 \times 10^{-2}$  | ko00072    |
| 32 | Alanine, aspartate and glutamate metabolism         | 20             | 45             | $2.39 \times 10^{-2}$  | ko00250    |
| 33 | Tyrosine metabolism                                 | 27             | 65             | $2.58 \times 10^{-2}$  | ko00350    |
| 34 | Mismatch repair                                     | 4              | 5              | $2.92 \times 10^{-2}$  | ko03430    |
| 35 | Pentose and glucuronate interconversions            | 33             | 83             | $2.92 \times 10^{-2}$  | ko00040    |
| 36 | Arachidonic acid metabolism                         | 30             | 75             | $3.36 \times 10^{-2}$  | ko00590    |
| 37 | Lysosome                                            | 47             | 128            | $4.70 \times 10^{-2}$  | ko04142    |
| 38 | alpha-Linolenic acid metabolism                     | 11             | 23             | $4.94 \times 10^{-2}$  | ko00592    |
| 39 | Fatty acid elongation                               | 15             | 37             | $1.01 \times 10^{-1}$  | ko00062    |
| 40 | Rheumatoid arthritis                                | 15             | 37             | $1.01 \times 10^{-1}$  | ko05323    |
| 41 | ECM-receptor interaction                            | 17             | 43             | $1.04 \times 10^{-1}$  | ko04512    |
| 42 | Porphyrin and chlorophyll metabolism                | 10             | 23             | $1.11 \times 10^{-1}$  | ko00860    |
| 43 | DNA replication                                     | 4              | 7              | $1.20 \times 10^{-1}$  | ko03030    |
| 44 | Fructose and mannose metabolism                     | 24             | 65             | $1.22 \times 10^{-1}$  | ko00051    |
| 45 | Glycine, serine and threonine metabolism            | 15             | 38             | $1.24 \times 10^{-1}$  | ko00260    |
| 46 | Histidine metabolism                                | 14             | 36             | $1.48 \times 10^{-1}$  | ko00340    |
| 47 | Ascorbate and aldarate metabolism                   | 16             | 42             | $1.48 \times 10^{-1}$  | ko00053    |
| 48 | Terpenoid backbone biosynthesis                     | 7              | 16             | $1.65 \times 10^{-1}$  | ko00900    |
| 49 | Cyanoamino acid metabolism                          | 8              | 19             | $1.71 \times 10^{-1}$  | ko00460    |
| 50 | Antigen processing and presentation                 | 16             | 43             | $1.75 \times 10^{-1}$  | ko04612    |
| 51 | Cysteine and methionine metabolism                  | 13             | 35             | $2.10 \times 10^{-1}$  | ko00270    |
| 52 | Small cell lung cancer                              | 13             | 35             | $2.10 \times 10^{-1}$  | ko05222    |
| 53 | Fat digestion and absorption                        | 8              | 20             | $2.15 \times 10^{-1}$  | ko04975    |
| 54 | Tuberculosis                                        | 20             | 57             | $2.19 \times 10^{-1}$  | ko05152    |
| 55 | Cardiac muscle contraction                          | 36             | 108            | $2.23 \times 10^{-1}$  | ko04260    |
| 56 | Riboflavin metabolism                               | 3              | 6              | $2.48 \times 10^{-1}$  | ko00740    |
| 57 | Homologous recombination                            | 3              | 6              | $2.48 \times 10^{-1}$  | ko03440    |
| 58 | Phenylalanine, tyrosine and tryptophan biosynthesis | 3              | 6              | $2.48 \times 10^{-1}$  | ko00400    |
| 59 | Polyketide sugar unit biosynthesis                  | 1              | 1              | $2.96 \times 10^{-1}$  | ko00523    |

|     |                                                            |    |     |                        |         |
|-----|------------------------------------------------------------|----|-----|------------------------|---------|
| 60  | Collecting duct acid secretion                             | 10 | 28  | $3.00 \times 10^{-1}$  | ko04966 |
| 61  | Sphingolipid metabolism                                    | 8  | 22  | $3.13 \times 10^{-1}$  | ko00600 |
| 62  | Renin-angiotensin system                                   | 13 | 38  | $3.21 \times 10^{-1}$  | ko04614 |
| 63  | Steroid hormone biosynthesis                               | 12 | 35  | $3.28 \times 10^{-1}$  | ko00140 |
| 64  | Nicotinate and nicotinamide metabolism                     | 5  | 13  | $3.33 \times 10^{-1}$  | ko00760 |
| 65  | Neuroactive ligand-receptor interaction                    | 2  | 4   | $3.41 \times 10^{-1}$  | ko04080 |
| 66  | D-Arginine and D-ornithine metabolism                      | 2  | 4   | $3.41 \times 10^{-1}$  | ko00472 |
| 67  | Selenocompound metabolism                                  | 3  | 7   | $3.43 \times 10^{-1}$  | ko00450 |
| 68  | Toxoplasmosis                                              | 18 | 55  | $3.52 \times 10^{-1}$  | ko05145 |
| 69  | Synaptic vesicle cycle                                     | 17 | 52  | $3.61 \times 10^{-1}$  | ko04721 |
| 70  | Drug metabolism—other enzymes                              | 20 | 63  | $4.00 \times 10^{-1}$  | ko00983 |
| 71  | Pyrimidine metabolism                                      | 13 | 40  | $4.01 \times 10^{-1}$  | ko00240 |
| 72  | Fatty acid biosynthesis                                    | 4  | 11  | $4.18 \times 10^{-1}$  | ko00061 |
| 73  | Valine, leucine and isoleucine biosynthesis                | 4  | 11  | $4.18 \times 10^{-1}$  | ko00290 |
| 74  | Prostate cancer                                            | 18 | 57  | $4.20 \times 10^{-1}$  | ko05215 |
| 75  | Phagosome                                                  | 32 | 104 | $4.33 \times 10^{-1}$  | ko04145 |
| 76  | Amino sugar and nucleotide sugar metabolism                | 13 | 41  | $4.41 \times 10^{-1}$  | ko00520 |
| 77  | Linoleic acid metabolism                                   | 9  | 28  | $4.54 \times 10^{-1}$  | ko00591 |
| 78  | Other glycan degradation                                   | 5  | 15  | $4.71 \times 10^{-1}$  | ko00511 |
| 79  | One carbon pool by folate                                  | 5  | 15  | $4.71 \times 10^{-1}$  | ko00670 |
| 80  | Protein digestion and absorption                           | 15 | 49  | $4.92 \times 10^{-1}$  | ko04974 |
| 81  | Dorso-ventral axis formation                               | 4  | 12  | $4.95 \times 10^{-1}$  | ko04320 |
| 82  | Lysine biosynthesis                                        | 1  | 2   | $5.04 \times 10^{-1}$  | ko00300 |
| 83  | Staphylococcus aureus infection                            | 1  | 2   | $5.04 \times 10^{-1}$  | ko05150 |
| 84  | Epithelial cell signaling in Helicobacter pylori infection | 11 | 36  | $5.13 \times 10^{-1}$  | ko05120 |
| 85  | Amoebiasis                                                 | 15 | 50  | $5.29 \times 10^{-1}$  | ko05146 |
| 86  | Protein processing in endoplasmic reticulum                | 41 | 140 | $5.66 \times 10^{-1}$  | ko04141 |
| 87  | N-Glycan biosynthesis                                      | 4  | 13  | $5.67 \times 10^{-1}$  | ko00510 |
| 88  | Other types of O-glycan biosynthesis                       | 4  | 13  | $5.67 \times 10^{-1}$  | ko00514 |
| 89  | Taurine and hypotaurine metabolism                         | 2  | 6   | $5.71 \times 10^{-1}$  | ko00430 |
| 90  | Nucleotide excision repair                                 | 2  | 6   | $5.71 \times 10^{-1}$  | ko03420 |
| 91  | Steroid biosynthesis                                       | 2  | 6   | $5.71 \times 10^{-1}$  | ko00100 |
| 92  | Folate biosynthesis                                        | 2  | 6   | $5.714 \times 10^{-1}$ | ko00790 |
| 93  | Adipocytokine signaling pathway                            | 10 | 34  | $5.74 \times 10^{-1}$  | ko04920 |
| 94  | Pathways in cancer                                         | 35 | 120 | $5.77 \times 10^{-1}$  | ko05200 |
| 95  | Dilated cardiomyopathy                                     | 37 | 127 | $5.81 \times 10^{-1}$  | ko05414 |
| 96  | Hypertrophic cardiomyopathy (HCM)                          | 37 | 127 | $5.81 \times 10^{-1}$  | ko05410 |
| 97  | Arrhythmogenic right ventricular cardiomyopathy (ARVC)     | 14 | 48  | $5.81 \times 10^{-1}$  | ko05412 |
| 98  | Regulation of actin cytoskeleton                           | 39 | 134 | $5.84 \times 10^{-1}$  | ko04810 |
| 99  | Mineral absorption                                         | 7  | 24  | $5.95 \times 10^{-1}$  | ko04978 |
| 100 | Hematopoietic cell lineage                                 | 9  | 31  | $5.95 \times 10^{-1}$  | ko04640 |
| 101 | Proximal tubule bicarbonate reclamation                    | 9  | 31  | $5.95 \times 10^{-1}$  | ko04964 |
| 102 | Primary bile acid biosynthesis                             | 8  | 28  | $6.18 \times 10^{-1}$  | ko00120 |
| 103 | Glycosphingolipid biosynthesis - ganglio series            | 1  | 3   | $6.51 \times 10^{-1}$  | ko00604 |
| 104 | Vitamin B6 metabolism                                      | 1  | 3   | $6.51 \times 10^{-1}$  | ko00750 |
| 105 | Inositol phosphate metabolism                              | 5  | 18  | $6.54 \times 10^{-1}$  | ko00562 |
| 106 | Type I diabetes mellitus                                   | 2  | 7   | $6.62 \times 10^{-1}$  | ko04940 |
| 107 | Cell adhesion molecules (CAMs)                             | 6  | 22  | $6.72 \times 10^{-1}$  | ko04514 |
| 108 | Viral myocarditis                                          | 22 | 79  | $6.76 \times 10^{-1}$  | ko05416 |
| 109 | NOD-like receptor signaling pathway                        | 3  | 11  | $6.77 \times 10^{-1}$  | ko04621 |
| 110 | Systemic lupus erythematosus                               | 4  | 15  | $6.92 \times 10^{-1}$  | ko05322 |
| 111 | Retrograde endocannabinoid signaling                       | 10 | 37  | $6.94 \times 10^{-1}$  | ko04723 |
| 112 | Vibrio cholerae infection                                  | 16 | 59  | $7.09 \times 10^{-1}$  | ko05110 |
| 113 | Sulfur metabolism                                          | 2  | 8   | $7.37 \times 10^{-1}$  | ko00920 |
| 114 | Pantothenate and CoA biosynthesis                          | 3  | 12  | $7.38 \times 10^{-1}$  | ko00770 |
| 115 | Ether lipid metabolism                                     | 3  | 12  | $7.38 \times 10^{-1}$  | ko00565 |
| 116 | Focal adhesion                                             | 33 | 121 | $7.47 \times 10^{-1}$  | ko04510 |
| 117 | Purine metabolism                                          | 22 | 82  | $7.48 \times 10^{-1}$  | ko00230 |
| 118 | Glycosaminoglycan degradation                              | 1  | 4   | $7.54 \times 10^{-1}$  | ko00531 |
| 119 | Autoimmune thyroid disease                                 | 1  | 4   | $7.54 \times 10^{-1}$  | ko05320 |
| 120 | Caffeine metabolism                                        | 1  | 4   | $7.54 \times 10^{-1}$  | ko00232 |

|     |                                                           |    |     |                       |         |
|-----|-----------------------------------------------------------|----|-----|-----------------------|---------|
| 121 | Ubiquinone and other terpenoid-quinone biosynthesis       | 7  | 28  | $7.67 \times 10^{-1}$ | ko00130 |
| 122 | Shigellosis                                               | 12 | 47  | $7.78 \times 10^{-1}$ | ko05131 |
| 123 | RNA degradation                                           | 12 | 47  | $7.78 \times 10^{-1}$ | ko03018 |
| 124 | Bile secretion                                            | 13 | 51  | $7.86 \times 10^{-1}$ | ko04976 |
| 125 | Type II diabetes mellitus                                 | 3  | 13  | $7.89 \times 10^{-1}$ | ko04930 |
| 126 | Ribosome                                                  | 48 | 177 | $7.95 \times 10^{-1}$ | ko03010 |
| 127 | Leishmaniasis                                             | 2  | 9   | $7.97 \times 10^{-1}$ | ko05140 |
| 128 | p53 signaling pathway                                     | 2  | 9   | $7.97 \times 10^{-1}$ | ko04115 |
| 129 | Endocytosis                                               | 23 | 89  | $8.16 \times 10^{-1}$ | ko04144 |
| 130 | Pertussis                                                 | 4  | 18  | $8.27 \times 10^{-1}$ | ko05133 |
| 131 | Malaria                                                   | 1  | 5   | $8.27 \times 10^{-1}$ | ko05144 |
| 132 | D-Glutamine and D-glutamate metabolism                    | 1  | 5   | $8.27 \times 10^{-1}$ | ko00471 |
| 133 | Sulfur relay system                                       | 1  | 5   | $8.27 \times 10^{-1}$ | ko04122 |
| 134 | Glycosphingolipid biosynthesis - globo series             | 1  | 5   | $8.27 \times 10^{-1}$ | ko00603 |
| 135 | Prion diseases                                            | 6  | 26  | $8.27 \times 10^{-1}$ | ko05020 |
| 136 | Bacterial invasion of epithelial cells                    | 13 | 53  | $8.33 \times 10^{-1}$ | ko05100 |
| 137 | Proteasome                                                | 13 | 54  | $8.53 \times 10^{-1}$ | ko03050 |
| 138 | Carbohydrate digestion and absorption                     | 5  | 23  | $8.56 \times 10^{-1}$ | ko04973 |
| 139 | Base excision repair                                      | 1  | 6   | $8.78 \times 10^{-1}$ | ko03410 |
| 140 | Mucin type O-Glycan biosynthesis                          | 1  | 6   | $8.78 \times 10^{-1}$ | ko00512 |
| 141 | Amyotrophic lateral sclerosis (ALS)                       | 9  | 40  | $8.79 \times 10^{-1}$ | ko05014 |
| 142 | Salmonella infection                                      | 25 | 101 | $8.85 \times 10^{-1}$ | ko05132 |
| 143 | Insulin signaling pathway                                 | 15 | 65  | $9.05 \times 10^{-1}$ | ko04910 |
| 144 | Aldosterone-regulated sodium reabsorption                 | 4  | 21  | $9.08 \times 10^{-1}$ | ko04960 |
| 145 | mRNA surveillance pathway                                 | 12 | 54  | $9.14 \times 10^{-1}$ | ko03015 |
| 146 | Vitamin digestion and absorption                          | 1  | 7   | $9.14 \times 10^{-1}$ | ko04977 |
| 147 | Bladder cancer                                            | 1  | 7   | $9.14 \times 10^{-1}$ | ko05219 |
| 148 | Protein export                                            | 5  | 26  | $9.21 \times 10^{-1}$ | ko03060 |
| 149 | RNA transport                                             | 28 | 117 | $9.31 \times 10^{-1}$ | ko03013 |
| 150 | Calcium signaling pathway                                 | 17 | 77  | $9.47 \times 10^{-1}$ | ko04020 |
| 151 | Ribosome biogenesis in eukaryotes                         | 9  | 45  | $9.48 \times 10^{-1}$ | ko03008 |
| 152 | Transcriptional misregulation in cancer                   | 3  | 19  | $9.50 \times 10^{-1}$ | ko05202 |
| 153 | Apoptosis                                                 | 3  | 19  | $9.50 \times 10^{-1}$ | ko04210 |
| 154 | Legionellosis                                             | 7  | 37  | $9.51 \times 10^{-1}$ | ko05134 |
| 155 | RIG-I-like receptor signaling pathway                     | 1  | 9   | $9.57 \times 10^{-1}$ | ko04622 |
| 156 | Taste transduction                                        | 1  | 9   | $9.57 \times 10^{-1}$ | ko04742 |
| 157 | Glycerophospholipid metabolism                            | 7  | 38  | $9.60 \times 10^{-1}$ | ko00564 |
| 158 | Fc gamma R-mediated phagocytosis                          | 9  | 47  | $9.63 \times 10^{-1}$ | ko04666 |
| 159 | Herpes simplex infection                                  | 8  | 44  | $9.71 \times 10^{-1}$ | ko05168 |
| 160 | mTOR signaling pathway                                    | 2  | 16  | $9.72 \times 10^{-1}$ | ko04150 |
| 161 | Measles                                                   | 5  | 31  | $9.73 \times 10^{-1}$ | ko05162 |
| 162 | Vascular smooth muscle contraction                        | 21 | 99  | $9.78 \times 10^{-1}$ | ko04270 |
| 163 | Melanoma                                                  | 1  | 11  | $9.79 \times 10^{-1}$ | ko05218 |
| 164 | HTLV-I infection                                          | 13 | 67  | $9.79 \times 10^{-1}$ | ko05166 |
| 165 | Endocrine and other factor-regulated calcium reabsorption | 8  | 46  | $9.81 \times 10^{-1}$ | ko04961 |
| 166 | Gastric acid secretion                                    | 11 | 59  | $9.81 \times 10^{-1}$ | ko04971 |
| 167 | Vasopressin-regulated water reabsorption                  | 3  | 23  | $9.82 \times 10^{-1}$ | ko04962 |
| 168 | Leukocyte transendothelial migration                      | 9  | 51  | $9.83 \times 10^{-1}$ | ko04670 |
| 169 | Renal cell carcinoma                                      | 2  | 18  | $9.84 \times 10^{-1}$ | ko05211 |
| 170 | Pancreatic cancer                                         | 2  | 18  | $9.84 \times 10^{-1}$ | ko05212 |
| 171 | Thyroid cancer                                            | 1  | 12  | $9.85 \times 10^{-1}$ | ko05216 |
| 172 | ABC transporters                                          | 3  | 24  | $9.87 \times 10^{-1}$ | ko02010 |
| 173 | Serotonergic synapse                                      | 6  | 39  | $9.87 \times 10^{-1}$ | ko04726 |
| 174 | Toll-like receptor signaling pathway                      | 1  | 13  | $9.89 \times 10^{-1}$ | ko04620 |
| 175 | GABAergic synapse                                         | 4  | 30  | $9.89 \times 10^{-1}$ | ko04727 |
| 176 | Cell cycle                                                | 4  | 30  | $9.89 \times 10^{-1}$ | ko04110 |
| 177 | NF-kappa B signaling pathway                              | 1  | 14  | $9.92 \times 10^{-1}$ | ko04064 |
| 178 | Jak-STAT signaling pathway                                | 1  | 14  | $9.92 \times 10^{-1}$ | ko04630 |
| 179 | VEGF signaling pathway                                    | 4  | 32  | $9.93 \times 10^{-1}$ | ko04370 |
| 180 | Phototransduction - fly                                   | 4  | 32  | $9.93 \times 10^{-1}$ | ko04745 |
| 181 | Influenza A                                               | 13 | 74  | $9.94 \times 10^{-1}$ | ko05164 |
| 182 | Alcoholism                                                | 5  | 38  | $9.95 \times 10^{-1}$ | ko05034 |
| 183 | Progesterone-mediated oocyte maturation                   | 2  | 22  | $9.95 \times 10^{-1}$ | ko04914 |

| 184 | Chronic myeloid leukemia                        | 1                                                                                                                                                                                                                                                                                                                                                                                                                                                                                                                                                                                                                                                                                                                                                                                                                                                                                                                                                                                                                                                                                                                                                                                                                                                                                                                                                                                                                                                                                                                                                                                                                                                                                                                                                                                                   | 16  | $9.96 \times 10^{-1}$ | ko05220 |
|-----|-------------------------------------------------|-----------------------------------------------------------------------------------------------------------------------------------------------------------------------------------------------------------------------------------------------------------------------------------------------------------------------------------------------------------------------------------------------------------------------------------------------------------------------------------------------------------------------------------------------------------------------------------------------------------------------------------------------------------------------------------------------------------------------------------------------------------------------------------------------------------------------------------------------------------------------------------------------------------------------------------------------------------------------------------------------------------------------------------------------------------------------------------------------------------------------------------------------------------------------------------------------------------------------------------------------------------------------------------------------------------------------------------------------------------------------------------------------------------------------------------------------------------------------------------------------------------------------------------------------------------------------------------------------------------------------------------------------------------------------------------------------------------------------------------------------------------------------------------------------------|-----|-----------------------|---------|
| 185 | Spliceosome                                     | 22                                                                                                                                                                                                                                                                                                                                                                                                                                                                                                                                                                                                                                                                                                                                                                                                                                                                                                                                                                                                                                                                                                                                                                                                                                                                                                                                                                                                                                                                                                                                                                                                                                                                                                                                                                                                  | 115 | $9.96 \times 10^{-1}$ | ko03040 |
| 186 | Adherens junction                               | 5                                                                                                                                                                                                                                                                                                                                                                                                                                                                                                                                                                                                                                                                                                                                                                                                                                                                                                                                                                                                                                                                                                                                                                                                                                                                                                                                                                                                                                                                                                                                                                                                                                                                                                                                                                                                   | 40  | $9.97 \times 10^{-1}$ | ko04520 |
| 187 | Tight junction                                  | 24                                                                                                                                                                                                                                                                                                                                                                                                                                                                                                                                                                                                                                                                                                                                                                                                                                                                                                                                                                                                                                                                                                                                                                                                                                                                                                                                                                                                                                                                                                                                                                                                                                                                                                                                                                                                  | 125 | $9.97 \times 10^{-1}$ | ko04530 |
| 188 | MAPK signaling pathway                          | 12                                                                                                                                                                                                                                                                                                                                                                                                                                                                                                                                                                                                                                                                                                                                                                                                                                                                                                                                                                                                                                                                                                                                                                                                                                                                                                                                                                                                                                                                                                                                                                                                                                                                                                                                                                                                  | 74  | $9.97 \times 10^{-1}$ | ko04010 |
| 189 | Endometrial cancer                              | 1                                                                                                                                                                                                                                                                                                                                                                                                                                                                                                                                                                                                                                                                                                                                                                                                                                                                                                                                                                                                                                                                                                                                                                                                                                                                                                                                                                                                                                                                                                                                                                                                                                                                                                                                                                                                   | 18  | $9.98 \times 10^{-1}$ | ko05213 |
| 190 | Colorectal cancer                               | 1                                                                                                                                                                                                                                                                                                                                                                                                                                                                                                                                                                                                                                                                                                                                                                                                                                                                                                                                                                                                                                                                                                                                                                                                                                                                                                                                                                                                                                                                                                                                                                                                                                                                                                                                                                                                   | 18  | $9.98 \times 10^{-1}$ | ko05210 |
| 191 | Pathogenic Escherichia coli infection           | 11                                                                                                                                                                                                                                                                                                                                                                                                                                                                                                                                                                                                                                                                                                                                                                                                                                                                                                                                                                                                                                                                                                                                                                                                                                                                                                                                                                                                                                                                                                                                                                                                                                                                                                                                                                                                  | 71  | $9.98 \times 10^{-1}$ | ko05130 |
| 192 | Amphetamine addiction                           | 2                                                                                                                                                                                                                                                                                                                                                                                                                                                                                                                                                                                                                                                                                                                                                                                                                                                                                                                                                                                                                                                                                                                                                                                                                                                                                                                                                                                                                                                                                                                                                                                                                                                                                                                                                                                                   | 26  | $9.98 \times 10^{-1}$ | ko05031 |
| 193 | Oocyte meiosis                                  | 4                                                                                                                                                                                                                                                                                                                                                                                                                                                                                                                                                                                                                                                                                                                                                                                                                                                                                                                                                                                                                                                                                                                                                                                                                                                                                                                                                                                                                                                                                                                                                                                                                                                                                                                                                                                                   | 38  | $9.98 \times 10^{-1}$ | ko04114 |
| 194 | Epstein-Barr virus infection                    | 12                                                                                                                                                                                                                                                                                                                                                                                                                                                                                                                                                                                                                                                                                                                                                                                                                                                                                                                                                                                                                                                                                                                                                                                                                                                                                                                                                                                                                                                                                                                                                                                                                                                                                                                                                                                                  | 78  | $9.98 \times 10^{-1}$ | ko05169 |
| 195 | Non-small cell lung cancer                      | 1                                                                                                                                                                                                                                                                                                                                                                                                                                                                                                                                                                                                                                                                                                                                                                                                                                                                                                                                                                                                                                                                                                                                                                                                                                                                                                                                                                                                                                                                                                                                                                                                                                                                                                                                                                                                   | 20  | $9.99 \times 10^{-1}$ | ko05223 |
| 196 | Pancreatic secretion                            | 6                                                                                                                                                                                                                                                                                                                                                                                                                                                                                                                                                                                                                                                                                                                                                                                                                                                                                                                                                                                                                                                                                                                                                                                                                                                                                                                                                                                                                                                                                                                                                                                                                                                                                                                                                                                                   | 51  | $9.99 \times 10^{-1}$ | ko04972 |
| 197 | Morphine addiction                              | 1                                                                                                                                                                                                                                                                                                                                                                                                                                                                                                                                                                                                                                                                                                                                                                                                                                                                                                                                                                                                                                                                                                                                                                                                                                                                                                                                                                                                                                                                                                                                                                                                                                                                                                                                                                                                   | 21  | $9.99 \times 10^{-1}$ | ko05032 |
| 198 | Glioma                                          | 1                                                                                                                                                                                                                                                                                                                                                                                                                                                                                                                                                                                                                                                                                                                                                                                                                                                                                                                                                                                                                                                                                                                                                                                                                                                                                                                                                                                                                                                                                                                                                                                                                                                                                                                                                                                                   | 21  | $9.99 \times 10^{-1}$ | ko05214 |
| 199 | Axon guidance                                   | 3                                                                                                                                                                                                                                                                                                                                                                                                                                                                                                                                                                                                                                                                                                                                                                                                                                                                                                                                                                                                                                                                                                                                                                                                                                                                                                                                                                                                                                                                                                                                                                                                                                                                                                                                                                                                   | 35  | $9.99 \times 10^{-1}$ | ko04360 |
| 200 | Fc epsilon RI signaling pathway                 | 2                                                                                                                                                                                                                                                                                                                                                                                                                                                                                                                                                                                                                                                                                                                                                                                                                                                                                                                                                                                                                                                                                                                                                                                                                                                                                                                                                                                                                                                                                                                                                                                                                                                                                                                                                                                                   | 29  | $9.99 \times 10^{-1}$ | ko04664 |
| 201 | Hepatitis C                                     | 1                                                                                                                                                                                                                                                                                                                                                                                                                                                                                                                                                                                                                                                                                                                                                                                                                                                                                                                                                                                                                                                                                                                                                                                                                                                                                                                                                                                                                                                                                                                                                                                                                                                                                                                                                                                                   | 22  | $9.99 \times 10^{-1}$ | ko05160 |
| 202 | Salivary secretion                              | 4                                                                                                                                                                                                                                                                                                                                                                                                                                                                                                                                                                                                                                                                                                                                                                                                                                                                                                                                                                                                                                                                                                                                                                                                                                                                                                                                                                                                                                                                                                                                                                                                                                                                                                                                                                                                   | 42  | $9.99 \times 10^{-1}$ | ko04970 |
| 203 | Ubiquitin mediated proteolysis                  | 6                                                                                                                                                                                                                                                                                                                                                                                                                                                                                                                                                                                                                                                                                                                                                                                                                                                                                                                                                                                                                                                                                                                                                                                                                                                                                                                                                                                                                                                                                                                                                                                                                                                                                                                                                                                                   | 53  | $9.99 \times 10^{-1}$ | ko04120 |
| 204 | ErbB signaling pathway                          | 2                                                                                                                                                                                                                                                                                                                                                                                                                                                                                                                                                                                                                                                                                                                                                                                                                                                                                                                                                                                                                                                                                                                                                                                                                                                                                                                                                                                                                                                                                                                                                                                                                                                                                                                                                                                                   | 30  | $9.99 \times 10^{-1}$ | ko04012 |
| 205 | Long-term potentiation                          | 2                                                                                                                                                                                                                                                                                                                                                                                                                                                                                                                                                                                                                                                                                                                                                                                                                                                                                                                                                                                                                                                                                                                                                                                                                                                                                                                                                                                                                                                                                                                                                                                                                                                                                                                                                                                                   | 30  | $9.99 \times 10^{-1}$ | ko04720 |
| 206 | Chagas disease (American trypanosomiasis)       | 1                                                                                                                                                                                                                                                                                                                                                                                                                                                                                                                                                                                                                                                                                                                                                                                                                                                                                                                                                                                                                                                                                                                                                                                                                                                                                                                                                                                                                                                                                                                                                                                                                                                                                                                                                                                                   | 23  | $9.99 \times 10^{-1}$ | ko05142 |
| 207 | Natural killer cell mediated cytotoxicity       | 1                                                                                                                                                                                                                                                                                                                                                                                                                                                                                                                                                                                                                                                                                                                                                                                                                                                                                                                                                                                                                                                                                                                                                                                                                                                                                                                                                                                                                                                                                                                                                                                                                                                                                                                                                                                                   | 24  | $9.99 \times 10^{-1}$ | ko04650 |
| 208 | Phosphatidylinositol signaling system           | 1                                                                                                                                                                                                                                                                                                                                                                                                                                                                                                                                                                                                                                                                                                                                                                                                                                                                                                                                                                                                                                                                                                                                                                                                                                                                                                                                                                                                                                                                                                                                                                                                                                                                                                                                                                                                   | 24  | $9.99 \times 10^{-1}$ | ko04070 |
| 209 | Wnt signaling pathway                           | 3                                                                                                                                                                                                                                                                                                                                                                                                                                                                                                                                                                                                                                                                                                                                                                                                                                                                                                                                                                                                                                                                                                                                                                                                                                                                                                                                                                                                                                                                                                                                                                                                                                                                                                                                                                                                   | 39  | $9.99 \times 10^{-1}$ | ko04310 |
| 210 | Neurotrophin signaling pathway                  | 2                                                                                                                                                                                                                                                                                                                                                                                                                                                                                                                                                                                                                                                                                                                                                                                                                                                                                                                                                                                                                                                                                                                                                                                                                                                                                                                                                                                                                                                                                                                                                                                                                                                                                                                                                                                                   | 34  | $9.99 \times 10^{-1}$ | ko04722 |
| 211 | T cell receptor signaling pathway               | 2                                                                                                                                                                                                                                                                                                                                                                                                                                                                                                                                                                                                                                                                                                                                                                                                                                                                                                                                                                                                                                                                                                                                                                                                                                                                                                                                                                                                                                                                                                                                                                                                                                                                                                                                                                                                   | 37  | $9.99 \times 10^{-1}$ | ko04660 |
| 212 | GnRH signaling pathway                          | 2                                                                                                                                                                                                                                                                                                                                                                                                                                                                                                                                                                                                                                                                                                                                                                                                                                                                                                                                                                                                                                                                                                                                                                                                                                                                                                                                                                                                                                                                                                                                                                                                                                                                                                                                                                                                   | 38  | $9.99 \times 10^{-1}$ | ko04912 |
| 213 | Gap junction                                    | 3                                                                                                                                                                                                                                                                                                                                                                                                                                                                                                                                                                                                                                                                                                                                                                                                                                                                                                                                                                                                                                                                                                                                                                                                                                                                                                                                                                                                                                                                                                                                                                                                                                                                                                                                                                                                   | 46  | $9.99 \times 10^{-1}$ | ko04540 |
| 214 | Chemokine signaling pathway                     | 3                                                                                                                                                                                                                                                                                                                                                                                                                                                                                                                                                                                                                                                                                                                                                                                                                                                                                                                                                                                                                                                                                                                                                                                                                                                                                                                                                                                                                                                                                                                                                                                                                                                                                                                                                                                                   | 47  | $9.99 \times 10^{-1}$ | ko04062 |
| 215 | Dopaminergic synapse                            | 3                                                                                                                                                                                                                                                                                                                                                                                                                                                                                                                                                                                                                                                                                                                                                                                                                                                                                                                                                                                                                                                                                                                                                                                                                                                                                                                                                                                                                                                                                                                                                                                                                                                                                                                                                                                                   | 48  | $9.99 \times 10^{-1}$ | ko04728 |
| 216 | Glutamatergic synapse                           | 2                                                                                                                                                                                                                                                                                                                                                                                                                                                                                                                                                                                                                                                                                                                                                                                                                                                                                                                                                                                                                                                                                                                                                                                                                                                                                                                                                                                                                                                                                                                                                                                                                                                                                                                                                                                                   | 42  | $9.99 \times 10^{-1}$ | ko04724 |
| 217 | Cholinergic synapse                             | 1                                                                                                                                                                                                                                                                                                                                                                                                                                                                                                                                                                                                                                                                                                                                                                                                                                                                                                                                                                                                                                                                                                                                                                                                                                                                                                                                                                                                                                                                                                                                                                                                                                                                                                                                                                                                   | 35  | $9.99 \times 10^{-1}$ | ko04725 |
| #   | Pathway                                         | Proteins                                                                                                                                                                                                                                                                                                                                                                                                                                                                                                                                                                                                                                                                                                                                                                                                                                                                                                                                                                                                                                                                                                                                                                                                                                                                                                                                                                                                                                                                                                                                                                                                                                                                                                                                                                                            |     |                       |         |
| 1   | Metabolic pathways<br>(no map in kegg database) | CL3577.Contig2_All, CL2780.Contig3_All, CL9784.Contig1_All, CL1623.Contig1_All, Unigene1665_All, Unigene4206_All, CL1181.Contig3_All, CL5661.Contig1_All, CL7964.Contig2_All, CL9723.Contig2_All, CL5576.Contig2_All, CL3543.Contig2_All, Unigene8070_All, Unigene22279_All, CL6939.Contig2_All, CL4988.Contig1_All, CL2664.Contig1_All, CL9384.Contig2_All, CL3932.Contig2_All, CL2312.Contig1_All, CL7841.Contig1_All, CL7944.Contig3_All, CL7107.Contig2_All, CL5383.Contig2_All, CL9064.Contig1_All, CL1521.Contig2_All, CL7130.Contig1_All, CL2464.Contig3_All, CL3798.Contig1_All, CL573.Contig1_All, Unigene7838_All, Unigene2609_All, CL3108.Contig1_All, Unigene27409_All, CL1012.Contig10_All, CL2660.Contig1_All, Unigene28027_All, CL2717.Contig2_All, Unigene118_All, CL2330.Contig1_All, CL860.Contig3_All, CL3815.Contig1_All, CL6328.Contig3_All, CL8564.Contig2_All, Unigene26224_All, CL4004.Contig3_All, Unigene21846_All, CL8538.Contig1_All, Unigene24033_All, Unigene11200_All, CL3833.Contig2_All, CL9241.Contig2_All, CL9975.Contig1_All, CL4391.Contig2_All, CL731.Contig1_All, Unigene3299_All, Unigene28419_All, Unigene22338_All, CL573.Contig2_All, CL5977.Contig2_All, CL7504.Contig1_All, Unigene7583_All, CL9768.Contig1_All, CL3063.Contig1_All, CL7557.Contig4_All, CL7104.Contig1_All, CL6788.Contig1_All, CL9609.Contig1_All, Unigene22665_All, CL3037.Contig5_All, Unigene6389_All, Unigene104_All, Unigene3398_All, CL5374.Contig3_All, CL1868.Contig3_All, CL200.Contig3_All, Unigene6758_All, CL9025.Contig2_All, CL5398.Contig1_All, CL837.Contig2_All, CL6788.Contig2_All, Unigene1879_All, CL846.Contig2_All, CL5897.Contig1_All, CL7766.Contig1_All, CL9394.Contig2_All, CL4031.Contig2_All, CL554.Contig1_All, CL8398.Contig1_All, CL4516.Contig1_All, |     |                       |         |

---

Unigene28933\_All, CL7504.Contig2\_All, CL9087.Contig1\_All, CL3305.Contig4\_All, CL3204.Contig1\_All, CL3677.Contig3\_All, CL7647.Contig1\_All, CL9117.Contig2\_All, CL7976.Contig1\_All, Unigene6334\_All, CL3136.Contig3\_All, Unigene7473\_All, CL1079.Contig1\_All, CL2270.Contig1\_All, CL3311.Contig1\_All, CL5005.Contig5\_All, CL6614.Contig2\_All, CL7505.Contig2\_All, Unigene1464\_All, CL3579.Contig2\_All, Unigene2532\_All, CL4435.Contig1\_All, CL6584.Contig1\_All, CL7213.Contig1\_All, CL9626.Contig1\_All, CL8398.Contig3\_All, CL9475.Contig2\_All, CL9241.Contig1\_All, Unigene144\_All, CL1341.Contig2\_All, CL9413.Contig1\_All, CL5462.Contig1\_All, Unigene21985\_All, Unigene3204\_All, CL9247.Contig2\_All, CL846.Contig4\_All, CL3677.Contig1\_All, CL6130.Contig1\_All, CL7291.Contig1\_All, CL9544.Contig2\_All, Unigene22956\_All, CL3687.Contig3\_All, CL6343.Contig2\_All, CL9412.Contig2\_All, Unigene708\_All, CL9955.Contig1\_All, Unigene2447\_All, CL3414.Contig2\_All, CL5525.Contig1\_All, CL8363.Contig1\_All, Unigene27153\_All, CL1452.Contig2\_All, Unigene28629\_All, Unigene5129\_All, CL9406.Contig1\_All, CL5782.Contig2\_All, Unigene6068\_All, CL9862.Contig1\_All, CL3469.Contig5\_All, CL8146.Contig4\_All, CL5436.Contig1\_All, CL9247.Contig1\_All, CL551.Contig34\_All, CL3185.Contig1\_All, CL3037.Contig1\_All, CL6249.Contig2\_All, CL3033.Contig1\_All, CL8538.Contig2\_All, Unigene29448\_All, Unigene7840\_All, CL1054.Contig1\_All, CL9379.Contig2\_All, CL6506.Contig1\_All, CL8471.Contig1\_All, Unigene29100\_All, CL6973.Contig1\_All, CL3888.Contig1\_All, CL3010.Contig1\_All, CL3108.Contig2\_All, CL2825.Contig2\_All, CL3414.Contig5\_All, CL5352.Contig2\_All, Unigene1640\_All, Unigene6769\_All, CL5436.Contig6\_All, CL6224.Contig2\_All, Unigene8619\_All, Unigene6644\_All, Unigene21637\_All, CL6328.Contig1\_All, Unigene26422\_All, Unigene1599\_All, Unigene29335\_All, CL1803.Contig1\_All, Unigene6820\_All, CL5782.Contig1\_All, CL5142.Contig1\_All, CL8564.Contig1\_All, CL1060.Contig3\_All, CL3893.Contig4\_All, CL4939.Contig1\_All, Unigene29299\_All, Unigene27273\_All, Unigene3119\_All, CL7557.Contig1\_All, Unigene3256\_All, CL7557.Contig2\_All, CL9739.Contig2\_All, CL986.Contig2\_All, CL4126.Contig1\_All, CL953.Contig1\_All, Unigene27764\_All, CL4013.Contig1\_All, CL152.Contig2\_All, Unigene26750\_All, CL2476.Contig2\_All, Unigene3371\_All, CL1530.Contig2\_All, CL3070.Contig4\_All, CL1452.Contig1\_All, Unigene6213\_All, Unigene1853\_All, CL2170.Contig4\_All, CL7008.Contig2\_All, Unigene27103\_All, CL2981.Contig1\_All, Unigene4883\_All, Unigene26386\_All, CL5369.Contig1\_All, CL837.Contig1\_All, CL2764.Contig2\_All, Unigene28320\_All, CL4316.Contig2\_All, Unigene8408\_All, CL1151.Contig3\_All, CL234.Contig2\_All, CL2200.Contig1\_All, CL4988.Contig3\_All, Unigene4625\_All, CL3242.Contig2\_All, Unigene11218\_All, CL3414.Contig4\_All, CL959.Contig2\_All, Unigene2480\_All, CL417.Contig5\_All, CL3034.Contig2\_All, Unigene7204\_All, CL8392.Contig1\_All, CL200.Contig1\_All, Unigene3383\_All, Unigene4114\_All, Unigene14682\_All, CL454.Contig2\_All, Unigene5020\_All, Unigene26641\_All, CL5095.Contig1\_All, CL3332.Contig1\_All, CL331.Contig1\_All, Unigene26244\_All, CL2490.Contig1\_All, Unigene10036\_All, Unigene4061\_All, CL445.Contig1\_All, CL7324.Contig1\_All, CL4316.Contig1\_All, CL674.Contig5\_All, CL9787.Contig2\_All, CL1959.Contig2\_All, CL7124.Contig2\_All, CL6219.Contig1\_All, CL3821.Contig1\_All, Unigene492\_All, CL6637.Contig1\_All, CL5525.Contig2\_All, Unigene26311\_All, Unigene794\_All, Unigene3179\_All, CL6129.Contig1\_All, CL6916.Contig1\_All, CL6295.Contig2\_All, CL9953.Contig1\_All, Unigene28268\_All, CL3833.Contig1\_All, CL6614.Contig1\_All, Unigene6197\_All, CL7452.Contig3\_All, Unigene27314\_All, CL7286.Contig1\_All, CL4841.Contig2\_All, CL5475.Contig3\_All, Unigene8351\_All, CL7503.Contig1\_All, CL4585.Contig1\_All, CL2170.Contig3\_All, CL9849.Contig2\_All,

---

Unigene25608\_All, CL3070.Contig5\_All, Unigene1544\_All, CL1803.Contig2\_All, CL5476.Contig2\_All, Unigene5482\_All, CL7664.Contig1\_All, CL6341.Contig2\_All, CL6339.Contig3\_All, Unigene4741\_All, CL3469.Contig1\_All, CL1735.Contig2\_All, CL2598.Contig1\_All, Unigene25786\_All, CL7841.Contig3\_All, Unigene29389\_All, Unigene27313\_All, CL1803.Contig3\_All, CL9281.Contig1\_All, CL9281.Contig2\_All, Unigene26882\_All, Unigene7581\_All, CL8987.Contig2\_All, CL8268.Contig2\_All, CL5345.Contig1\_All, Unigene8149\_All, CL3204.Contig3\_All, CL8622.Contig1\_All, CL3342.Contig3\_All, Unigene6696\_All, CL8268.Contig3\_All, CL5638.Contig2\_All, CL3809.Contig2\_All, Unigene3207\_All, CL443.Contig1\_All, CL1660.Contig4\_All, CL9379.Contig1\_All, CL2088.Contig1\_All, Unigene5872\_All, Unigene6249\_All, CL6712.Contig1\_All, CL8664.Contig3\_All, CL8508.Contig1\_All, CL1959.Contig1\_All, CL9394.Contig1\_All, Unigene5748\_All, CL8306.Contig1\_All, Unigene25872\_All, CL4442.Contig1\_All, CL6826.Contig1\_All, CL8984.Contig3\_All, CL2291.Contig2\_All, CL9064.Contig2\_All, CL5369.Contig3\_All, CL3342.Contig1\_All, Unigene2804\_All, CL4667.Contig1\_All, CL7282.Contig3\_All, CL2464.Contig2\_All, CL9078.Contig1\_All, CL7107.Contig1\_All, Unigene6212\_All, CL6224.Contig1\_All, Unigene3291\_All, Unigene749\_All, CL2540.Contig1\_All, CL9240.Contig1\_All, CL3289.Contig1\_All, Unigene26168\_All, CL7342.Contig1\_All, CL1157.Contig2\_All, CL3894.Contig2\_All, Unigene26585\_All, Unigene6153\_All, CL222.Contig1\_All, CL1028.Contig2\_All, CL5016.Contig2\_All, CL7831.Contig2\_All, Unigene4471\_All, CL1936.Contig1\_All, CL5445.Contig1\_All, CL3382.Contig2\_All, CL824.Contig2\_All, CL6382.Contig1\_All, CL4098.Contig2\_All, CL6826.Contig2\_All, CL8471.Contig2\_All, Unigene8059\_All, CL6712.Contig2\_All, CL2367.Contig1\_All, CL3543.Contig1\_All, CL8664.Contig1\_All, CL3034.Contig1\_All, CL6098.Contig1\_All, CL10058.Contig2\_All, CL9544.Contig1\_All, CL4904.Contig1\_All, CL7409.Contig1\_All, CL4606.Contig2\_All, CL8754.Contig2\_All, Unigene28039\_All, CL5550.Contig3\_All, CL5476.Contig1\_All, CL4016.Contig2\_All, Unigene27679\_All, CL9739.Contig1\_All, Unigene25939\_All, Unigene601\_All, Unigene3110\_All, CL8306.Contig2\_All, CL3579.Contig1\_All, CL3022.Contig1\_All, CL7002.Contig2\_All, CL9915.Contig2\_All, CL6584.Contig3\_All, CL443.Contig3\_All, CL5550.Contig1\_All, CL3136.Contig1\_All, CL923.Contig1\_All, CL554.Contig2\_All, CL5445.Contig3\_All, CL2088.Contig2\_All, CL7124.Contig1\_All, CL9081.Contig1\_All, Unigene5837\_All, CL4695.Contig3\_All, Unigene27524\_All, CL7831.Contig1\_All, CL2972.Contig2\_All, Unigene7481\_All, CL6786.Contig1\_All, CL4606.Contig1\_All, Unigene8364\_All, CL4474.Contig1\_All, CL5346.Contig1\_All, CL3932.Contig1\_All, Unigene4972\_All, Unigene4852\_All, Unigene27434\_All, CL4013.Contig2\_All, CL3641.Contig1\_All, CL5986.Contig2\_All, Unigene6172\_All, CL5445.Contig2\_All, CL5082.Contig2\_All, CL4169.Contig1\_All, CL4657.Contig1\_All, Unigene3171\_All, Unigene7850\_All, Unigene21428\_All, CL5044.Contig1\_All, CL8984.Contig2\_All, CL5986.Contig1\_All, Unigene7623\_All, Unigene2497\_All, CL9338.Contig1\_All, Unigene326\_All, Unigene27974\_All, CL9081.Contig2\_All, CL9784.Contig1\_All, Unigene1665\_All, Unigene8070\_All, CL2312.Contig1\_All, CL9241.Contig2\_All, Unigene28419\_All, CL7504.Contig1\_All, CL3037.Contig5\_All, Unigene6758\_All, CL9394.Contig2\_All, CL4031.Contig2\_All, CL8398.Contig1\_All, CL4516.Contig1\_All, CL7504.Contig2\_All, CL3677.Contig3\_All, CL1079.Contig1\_All, CL3311.Contig1\_All, CL6614.Contig2\_All, CL8398.Contig3\_All, CL9241.Contig1\_All, CL1341.Contig2\_All, CL3677.Contig1\_All, CL6343.Contig2\_All, CL9955.Contig1\_All, CL1452.Contig2\_All, CL3037.Contig1\_All, CL6249.Contig2\_All, Unigene1640\_All, CL6224.Contig2\_All, CL1803.Contig1\_All, CL244.Contig3\_All, CL1452.Contig1\_All, Unigene27103\_All, Unigene8408\_All, CL417.Contig5\_All, CL331.Contig1\_All,



|   |                              |                                                                                                                                                                                                                                                                                                                                                                                                                                                                                                                                                                                                                                                                                                                                                                                                                                                                                                                                                                                                                                                                                                                                                                                                                                                                                                                                                                                                                                                                                                                                                                                                                                                                                                                                                                                                                                                                                                                                                                                                                                                                                                                                                                                                                                                                                                                                                                                                                                                                                                                                                                                                                                                                                                                                                                                                                                                                                                                                                                                                                                                                                                                                                                                                                                                                                                                                                                                                                                                                                                                                                                                                                                                                                                                                                                                                        |
|---|------------------------------|--------------------------------------------------------------------------------------------------------------------------------------------------------------------------------------------------------------------------------------------------------------------------------------------------------------------------------------------------------------------------------------------------------------------------------------------------------------------------------------------------------------------------------------------------------------------------------------------------------------------------------------------------------------------------------------------------------------------------------------------------------------------------------------------------------------------------------------------------------------------------------------------------------------------------------------------------------------------------------------------------------------------------------------------------------------------------------------------------------------------------------------------------------------------------------------------------------------------------------------------------------------------------------------------------------------------------------------------------------------------------------------------------------------------------------------------------------------------------------------------------------------------------------------------------------------------------------------------------------------------------------------------------------------------------------------------------------------------------------------------------------------------------------------------------------------------------------------------------------------------------------------------------------------------------------------------------------------------------------------------------------------------------------------------------------------------------------------------------------------------------------------------------------------------------------------------------------------------------------------------------------------------------------------------------------------------------------------------------------------------------------------------------------------------------------------------------------------------------------------------------------------------------------------------------------------------------------------------------------------------------------------------------------------------------------------------------------------------------------------------------------------------------------------------------------------------------------------------------------------------------------------------------------------------------------------------------------------------------------------------------------------------------------------------------------------------------------------------------------------------------------------------------------------------------------------------------------------------------------------------------------------------------------------------------------------------------------------------------------------------------------------------------------------------------------------------------------------------------------------------------------------------------------------------------------------------------------------------------------------------------------------------------------------------------------------------------------------------------------------------------------------------------------------------------------|
| 3 | Glycolysis / Gluconeogenesis | <p>CL2490.Contig1_All, Unigene794_All, CL6916.Contig1_All, CL6614.Contig1_All, CL7286.Contig1_All, CL1803.Contig2_All, Unigene4741_All, CL2598.Contig1_All, Unigene25786_All, CL1803.Contig3_All, CL6712.Contig1_All, CL9394.Contig1_All, Unigene25872_All, CL6224.Contig1_All, CL3894.Contig2_All, CL1028.Contig2_All, CL6712.Contig2_All, CL2367.Contig1_All, CL6098.Contig1_All, CL7409.Contig1_All, CL4606.Contig2_All, CL923.Contig1_All, CL4606.Contig1_All, CL5986.Contig2_All, CL5986.Contig1_All</p> <p>CL9784.Contig1_All, CL7964.Contig2_All, CL6939.Contig2_All, CL2464.Contig3_All, CL3815.Contig1_All, CL8538.Contig1_All, Unigene22338_All, CL200.Contig3_All, Unigene6758_All, CL837.Contig2_All, CL7766.Contig1_All, CL8398.Contig1_All, CL9087.Contig1_All, CL3204.Contig1_All, CL1079.Contig1_All, Unigene1464_All, CL8398.Contig3_All, CL9247.Contig2_All, CL9544.Contig2_All, Unigene22956_All, CL9955.Contig1_All, CL8363.Contig1_All, Unigene5129_All, Unigene6068_All, CL9862.Contig1_All, CL9247.Contig1_All, CL8538.Contig2_All, Unigene7840_All, Unigene8619_All, CL1060.Contig3_All, CL3070.Contig4_All, Unigene6213_All, CL837.Contig1_All, Unigene8408_All, CL200.Contig1_All, Unigene14682_All, Unigene26641_All, CL5095.Contig1_All, CL331.Contig1_All, CL7124.Contig2_All, Unigene492_All, Unigene6197_All, CL5475.Contig3_All, CL3070.Contig5_All, Unigene1544_All, CL6339.Contig3_All, CL2598.Contig1_All, CL3204.Contig3_All, CL3342.Contig3_All, CL3809.Contig2_All, CL3342.Contig1_All, CL2464.Contig2_All, CL7342.Contig1_All, CL1028.Contig2_All, CL6098.Contig1_All, CL9544.Contig1_All, CL7409.Contig1_All, CL7002.Contig2_All, CL923.Contig1_All, CL7124.Contig1_All, CL9081.Contig1_All, Unigene5837_All, CL6786.Contig1_All, CL4474.Contig1_All, Unigene7850_All, Unigene2497_All, CL9081.Contig2_All</p> <p>CL9784.Contig1_All, Unigene1665_All, CL5661.Contig1_All, Unigene8070_All, CL2312.Contig1_All, Unigene7838_All, Unigene27962_All, Unigene953_All, Unigene28419_All, CL7504.Contig1_All, Unigene6758_All, CL8398.Contig1_All, CL4516.Contig1_All, CL7504.Contig2_All, CL9087.Contig1_All, CL3204.Contig1_All, Unigene7473_All, CL1079.Contig1_All, CL8398.Contig3_All, CL1341.Contig2_All, CL6343.Contig2_All, CL9955.Contig1_All, CL8363.Contig1_All, CL5436.Contig1_All, CL6249.Contig2_All, Unigene29448_All, CL3010.Contig1_All, CL5436.Contig6_All, CL6224.Contig2_All, Unigene22136_All, CL1803.Contig1_All, CL7093.Contig1_All, Unigene6213_All, Unigene4883_All, Unigene8408_All, CL417.Contig5_All, CL3034.Contig2_All, CL331.Contig1_All, CL3821.Contig1_All, Unigene492_All, Unigene794_All, CL6916.Contig1_All, CL9849.Contig2_All, CL1803.Contig2_All, CL6339.Contig3_All, Unigene4741_All, CL2598.Contig1_All, CL1803.Contig3_All, CL3204.Contig3_All, Unigene6696_All, CL3953.Contig2_All, CL6712.Contig1_All, Unigene25872_All, CL3507.Contig1_All, CL4667.Contig1_All, CL6224.Contig1_All, CL1028.Contig2_All, CL6712.Contig2_All, CL2367.Contig1_All, CL3034.Contig1_All, CL6098.Contig1_All, CL7002.Contig2_All, CL923.Contig1_All, Unigene5837_All, CL5986.Contig2_All, CL4169.Contig1_All, CL5986.Contig1_All</p> <p>CL9784.Contig1_All, CL3543.Contig2_All, Unigene6758_All, CL837.Contig2_All, CL7766.Contig1_All, CL8398.Contig1_All, CL7647.Contig1_All, CL1079.Contig1_All, Unigene1464_All, CL8398.Contig3_All, Unigene21985_All, Unigene3204_All, CL9544.Contig2_All, CL9955.Contig1_All, CL6679.Contig1_All, CL9862.Contig1_All, CL551.Contig34_All, CL6249.Contig2_All, CL6224.Contig2_All, CL1060.Contig3_All, CL4939.Contig1_All, CL986.Contig2_All, CL3070.Contig4_All, CL837.Contig1_All, Unigene8408_All, Unigene26641_All, CL5095.Contig1_All, CL331.Contig1_All, CL7124.Contig2_All, Unigene6197_All,</p> |
| 4 | Fatty acid metabolism        | <p>CL9784.Contig1_All, CL3543.Contig2_All, Unigene6758_All, CL837.Contig2_All, CL7766.Contig1_All, CL8398.Contig1_All, CL7647.Contig1_All, CL1079.Contig1_All, Unigene1464_All, CL8398.Contig3_All, Unigene21985_All, Unigene3204_All, CL9544.Contig2_All, CL9955.Contig1_All, CL6679.Contig1_All, CL9862.Contig1_All, CL551.Contig34_All, CL6249.Contig2_All, CL6224.Contig2_All, CL1060.Contig3_All, CL4939.Contig1_All, CL986.Contig2_All, CL3070.Contig4_All, CL837.Contig1_All, Unigene8408_All, Unigene26641_All, CL5095.Contig1_All, CL331.Contig1_All, CL7124.Contig2_All, Unigene6197_All,</p>                                                                                                                                                                                                                                                                                                                                                                                                                                                                                                                                                                                                                                                                                                                                                                                                                                                                                                                                                                                                                                                                                                                                                                                                                                                                                                                                                                                                                                                                                                                                                                                                                                                                                                                                                                                                                                                                                                                                                                                                                                                                                                                                                                                                                                                                                                                                                                                                                                                                                                                                                                                                                                                                                                                                                                                                                                                                                                                                                                                                                                                                                                                                                                                                |
| 5 | Pyruvate metabolism          | <p>CL9784.Contig1_All, CL3543.Contig2_All, Unigene6758_All, CL837.Contig2_All, CL7766.Contig1_All, CL8398.Contig1_All, CL7647.Contig1_All, CL1079.Contig1_All, Unigene1464_All, CL8398.Contig3_All, Unigene21985_All, Unigene3204_All, CL9544.Contig2_All, CL9955.Contig1_All, CL6679.Contig1_All, CL9862.Contig1_All, CL551.Contig34_All, CL6249.Contig2_All, CL6224.Contig2_All, CL1060.Contig3_All, CL4939.Contig1_All, CL986.Contig2_All, CL3070.Contig4_All, CL837.Contig1_All, Unigene8408_All, Unigene26641_All, CL5095.Contig1_All, CL331.Contig1_All, CL7124.Contig2_All, Unigene6197_All,</p>                                                                                                                                                                                                                                                                                                                                                                                                                                                                                                                                                                                                                                                                                                                                                                                                                                                                                                                                                                                                                                                                                                                                                                                                                                                                                                                                                                                                                                                                                                                                                                                                                                                                                                                                                                                                                                                                                                                                                                                                                                                                                                                                                                                                                                                                                                                                                                                                                                                                                                                                                                                                                                                                                                                                                                                                                                                                                                                                                                                                                                                                                                                                                                                                |

|   |                             |                                                                                                                                                                                                                                                                                                                                                                                                                                                                                                                                                                                                                                                                                                                                                                                                                                                                                                                                                                                                                                                                                                                                                                                                                                                                                                                                                                                                                                                                                                                                                                                                                                                                                                                                                                                                                                                                                                                                                                                                                                                                                                                                                                                                                                                                                                                                                                                                                                                                                                                                                                                                                                                                                                                                                                                                                                                                                                                                                                                                                                                                                                                                                                                                                                                                                                                                                                                                                                                                                                                                                                                                                                                                                                                                                                                                                                                              |
|---|-----------------------------|--------------------------------------------------------------------------------------------------------------------------------------------------------------------------------------------------------------------------------------------------------------------------------------------------------------------------------------------------------------------------------------------------------------------------------------------------------------------------------------------------------------------------------------------------------------------------------------------------------------------------------------------------------------------------------------------------------------------------------------------------------------------------------------------------------------------------------------------------------------------------------------------------------------------------------------------------------------------------------------------------------------------------------------------------------------------------------------------------------------------------------------------------------------------------------------------------------------------------------------------------------------------------------------------------------------------------------------------------------------------------------------------------------------------------------------------------------------------------------------------------------------------------------------------------------------------------------------------------------------------------------------------------------------------------------------------------------------------------------------------------------------------------------------------------------------------------------------------------------------------------------------------------------------------------------------------------------------------------------------------------------------------------------------------------------------------------------------------------------------------------------------------------------------------------------------------------------------------------------------------------------------------------------------------------------------------------------------------------------------------------------------------------------------------------------------------------------------------------------------------------------------------------------------------------------------------------------------------------------------------------------------------------------------------------------------------------------------------------------------------------------------------------------------------------------------------------------------------------------------------------------------------------------------------------------------------------------------------------------------------------------------------------------------------------------------------------------------------------------------------------------------------------------------------------------------------------------------------------------------------------------------------------------------------------------------------------------------------------------------------------------------------------------------------------------------------------------------------------------------------------------------------------------------------------------------------------------------------------------------------------------------------------------------------------------------------------------------------------------------------------------------------------------------------------------------------------------------------------------------|
|   |                             | Unigene27314_All, CL5475.Contig3_All, CL3075.Contig5_All, CL2598.Contig1_All, Unigene27313_All, Unigene7581_All, CL8268.Contig2_All, CL8268.Contig3_All, CL6224.Contig1_All, CL7342.Contig1_All, CL1028.Contig2_All, CL3543.Contig1_All, CL6098.Contig1_All, CL9544.Contig1_All, CL7409.Contig1_All, Unigene25939_All, Unigene3110_All, CL923.Contig1_All, CL7124.Contig1_All, CL4474.Contig1_All, Unigene2497_All, CL3543.Contig2_All, CL5383.Contig2_All, CL7130.Contig1_All, CL1012.Contig10_All, CL731.Contig1_All, Unigene3299_All, CL5374.Contig3_All, Unigene1464_All, Unigene21985_All, Unigene3204_All, CL9544.Contig2_All, CL9862.Contig1_All, CL551.Contig34_All, CL5142.Contig1_All, CL1060.Contig3_All, Unigene3119_All, CL4013.Contig1_All, CL1530.Contig2_All, Unigene10036_All, CL9787.Contig2_All, Unigene27314_All, CL5475.Contig3_All, CL5476.Contig2_All, Unigene27313_All, Unigene7581_All, CL8268.Contig2_All, CL8268.Contig3_All, CL9078.Contig1_All, CL3289.Contig1_All, CL7342.Contig1_All, CL7831.Contig2_All, CL3543.Contig1_All, CL9544.Contig1_All, CL7409.Contig1_All, CL5476.Contig1_All, Unigene25939_All, Unigene3110_All, Unigene27524_All, CL7831.Contig1_All, CL4474.Contig1_All, Unigene4972_All, CL4013.Contig2_All, CL9784.Contig1_All, Unigene8070_All, CL2312.Contig1_All, Unigene28419_All, CL3037.Contig5_All, Unigene6758_All, CL8398.Contig1_All, CL4516.Contig1_All, CL1079.Contig1_All, CL6614.Contig2_All, CL8398.Contig3_All, CL1341.Contig2_All, CL9413.Contig1_All, CL6343.Contig2_All, CL9955.Contig1_All, CL3037.Contig1_All, Unigene1640_All, CL1803.Contig1_All, Unigene27103_All, Unigene8408_All, CL417.Contig5_All, CL331.Contig1_All, CL6916.Contig1_All, CL6614.Contig1_All, CL1803.Contig2_All, Unigene4741_All, CL2598.Contig1_All, CL1803.Contig3_All, Unigene3207_All, CL6712.Contig1_All, CL8306.Contig1_All, CL1028.Contig2_All, CL6712.Contig2_All, CL2367.Contig1_All, CL6098.Contig1_All, CL4016.Contig2_All, CL8306.Contig2_All, CL923.Contig1_All, CL2771.Contig1_All, CL2004.Contig1_All, CL1096.Contig6_All, CL4404.Contig2_All, CL2265.Contig1_All, Unigene24027_All, CL2265.Contig3_All, CL8383.Contig3_All, CL7340.Contig1_All, CL5782.Contig2_All, CL6376.Contig2_All, Unigene4153_All, CL2004.Contig2_All, CL5782.Contig1_All, CL1096.Contig2_All, CL1473.Contig1_All, CL9434.Contig1_All, CL6690.Contig1_All, Unigene28268_All, CL8383.Contig1_All, CL770.Contig1_All, CL6416.Contig1_All, Unigene5774_All, CL2771.Contig3_All, CL6376.Contig1_All, CL7639.Contig3_All, CL1623.Contig1_All, CL9723.Contig2_All, Unigene22279_All, CL1521.Contig2_All, CL1012.Contig10_All, Unigene28027_All, CL2717.Contig2_All, Unigene11200_All, Unigene3299_All, CL5977.Contig2_All, CL3063.Contig1_All, CL6788.Contig1_All, CL3504.Contig8_All, CL6788.Contig2_All, CL846.Contig2_All, CL554.Contig1_All, CL3305.Contig4_All, Unigene6334_All, Unigene2532_All, CL9475.Contig2_All, CL846.Contig4_All, Unigene2447_All, CL3414.Contig2_All, CL5525.Contig1_All, CL9379.Contig2_All, CL2825.Contig2_All, CL3414.Contig5_All, Unigene6769_All, Unigene10607_All, Unigene1599_All, Unigene29335_All, CL5142.Contig1_All, Unigene29299_All, CL4013.Contig1_All, CL2170.Contig4_All, Unigene28320_All, CL1151.Contig3_All, Unigene4625_All, Unigene11218_All, CL3414.Contig4_All, Unigene2480_All, Unigene7204_All, Unigene26244_All, CL1959.Contig2_All, CL5525.Contig2_All, Unigene26311_All, CL4841.Contig2_All, CL2170.Contig3_All, Unigene25608_All, CL9281.Contig1_All, CL9281.Contig2_All, CL9379.Contig1_All, CL2088.Contig1_All, CL1959.Contig1_All, CL6826.Contig1_All, Unigene6212_All, Unigene749_All, Unigene26585_All, CL3382.Contig2_All, CL4098.Contig2_All, CL6826.Contig2_All, Unigene8059_All, Unigene27679_All, CL3022.Contig1_All, CL9915.Contig2_All, CL554.Contig2_All, |
| 6 | Citrate cycle (TCA cycle)   |                                                                                                                                                                                                                                                                                                                                                                                                                                                                                                                                                                                                                                                                                                                                                                                                                                                                                                                                                                                                                                                                                                                                                                                                                                                                                                                                                                                                                                                                                                                                                                                                                                                                                                                                                                                                                                                                                                                                                                                                                                                                                                                                                                                                                                                                                                                                                                                                                                                                                                                                                                                                                                                                                                                                                                                                                                                                                                                                                                                                                                                                                                                                                                                                                                                                                                                                                                                                                                                                                                                                                                                                                                                                                                                                                                                                                                                              |
| 7 | beta-Alanine metabolism     |                                                                                                                                                                                                                                                                                                                                                                                                                                                                                                                                                                                                                                                                                                                                                                                                                                                                                                                                                                                                                                                                                                                                                                                                                                                                                                                                                                                                                                                                                                                                                                                                                                                                                                                                                                                                                                                                                                                                                                                                                                                                                                                                                                                                                                                                                                                                                                                                                                                                                                                                                                                                                                                                                                                                                                                                                                                                                                                                                                                                                                                                                                                                                                                                                                                                                                                                                                                                                                                                                                                                                                                                                                                                                                                                                                                                                                                              |
| 8 | Aminoacyl-tRNA biosynthesis |                                                                                                                                                                                                                                                                                                                                                                                                                                                                                                                                                                                                                                                                                                                                                                                                                                                                                                                                                                                                                                                                                                                                                                                                                                                                                                                                                                                                                                                                                                                                                                                                                                                                                                                                                                                                                                                                                                                                                                                                                                                                                                                                                                                                                                                                                                                                                                                                                                                                                                                                                                                                                                                                                                                                                                                                                                                                                                                                                                                                                                                                                                                                                                                                                                                                                                                                                                                                                                                                                                                                                                                                                                                                                                                                                                                                                                                              |
| 9 | Oxidative phosphorylation   |                                                                                                                                                                                                                                                                                                                                                                                                                                                                                                                                                                                                                                                                                                                                                                                                                                                                                                                                                                                                                                                                                                                                                                                                                                                                                                                                                                                                                                                                                                                                                                                                                                                                                                                                                                                                                                                                                                                                                                                                                                                                                                                                                                                                                                                                                                                                                                                                                                                                                                                                                                                                                                                                                                                                                                                                                                                                                                                                                                                                                                                                                                                                                                                                                                                                                                                                                                                                                                                                                                                                                                                                                                                                                                                                                                                                                                                              |

|    |                       |                                                                                                                                                                                                                                                                                                                                                                                                                                                                                                                                                                                                                                                                                                                                                                                                                                                                                                                                                                                                                                                                                                                                                                                                                                                                                                                                                                                                                                                                                                                                                                                                                                                                                                                                                                                                                                                                                                                                                                                                                                                                                                                                                                                                                                                                                                                                                                                                                                                                                                                                                                                                                                                                                                                                                                                                                                                                                                                                                                                                                                                                                                                                                                                                                                                                                                                                                                                                                                                                                                                                                                                                                                                                                                                                                                                                                                                                                                                                                                                                                                                                                                                                                         |
|----|-----------------------|---------------------------------------------------------------------------------------------------------------------------------------------------------------------------------------------------------------------------------------------------------------------------------------------------------------------------------------------------------------------------------------------------------------------------------------------------------------------------------------------------------------------------------------------------------------------------------------------------------------------------------------------------------------------------------------------------------------------------------------------------------------------------------------------------------------------------------------------------------------------------------------------------------------------------------------------------------------------------------------------------------------------------------------------------------------------------------------------------------------------------------------------------------------------------------------------------------------------------------------------------------------------------------------------------------------------------------------------------------------------------------------------------------------------------------------------------------------------------------------------------------------------------------------------------------------------------------------------------------------------------------------------------------------------------------------------------------------------------------------------------------------------------------------------------------------------------------------------------------------------------------------------------------------------------------------------------------------------------------------------------------------------------------------------------------------------------------------------------------------------------------------------------------------------------------------------------------------------------------------------------------------------------------------------------------------------------------------------------------------------------------------------------------------------------------------------------------------------------------------------------------------------------------------------------------------------------------------------------------------------------------------------------------------------------------------------------------------------------------------------------------------------------------------------------------------------------------------------------------------------------------------------------------------------------------------------------------------------------------------------------------------------------------------------------------------------------------------------------------------------------------------------------------------------------------------------------------------------------------------------------------------------------------------------------------------------------------------------------------------------------------------------------------------------------------------------------------------------------------------------------------------------------------------------------------------------------------------------------------------------------------------------------------------------------------------------------------------------------------------------------------------------------------------------------------------------------------------------------------------------------------------------------------------------------------------------------------------------------------------------------------------------------------------------------------------------------------------------------------------------------------------------------------|
| 10 | Propanoate metabolism | <p>CL2088.Contig2_All, Unigene27524_All, Unigene7481_All,<br/> CL4013.Contig2_All, Unigene7623_All<br/> CL9784.Contig1_All, Unigene8070_All, CL2312.Contig1_All,<br/> CL7130.Contig1_All, Unigene28419_All, CL3037.Contig5_All,<br/> Unigene6758_All, CL7766.Contig1_All, CL8398.Contig1_All,<br/> CL4516.Contig1_All, CL1079.Contig1_All, CL6614.Contig2_All,<br/> CL8398.Contig3_All, CL1341.Contig2_All, CL6343.Contig2_All,<br/> CL9955.Contig1_All, CL3037.Contig1_All, CL6249.Contig2_All,<br/> Unigene1640_All, CL6224.Contig2_All, CL1803.Contig1_All,<br/> CL986.Contig2_All, Unigene27103_All, Unigene8408_All,<br/> CL417.Contig5_All, CL331.Contig1_All, CL2490.Contig1_All,<br/> CL6916.Contig1_All, CL6614.Contig1_All, CL7286.Contig1_All,<br/> CL1803.Contig2_All, Unigene4741_All, CL2598.Contig1_All,<br/> CL1803.Contig3_All, CL6712.Contig1_All, CL9078.Contig1_All,<br/> CL6224.Contig1_All, CL1028.Contig2_All, CL6712.Contig2_All,<br/> CL2367.Contig1_All, CL6098.Contig1_All, CL923.Contig1_All<br/> Unigene835_All, CL1623.Contig1_All, Unigene22279_All,<br/> Unigene5913_All, CL1521.Contig2_All, CL1012.Contig10_All,<br/> Unigene28027_All, Unigene11200_All, Unigene3299_All,<br/> CL5977.Contig2_All, CL3063.Contig1_All, CL6788.Contig1_All,<br/> CL6788.Contig2_All, CL3305.Contig4_All, Unigene6334_All,<br/> Unigene2532_All, CL9475.Contig2_All, CL9189.Contig2_All,<br/> Unigene2447_All, CL3414.Contig2_All, CL5525.Contig1_All,<br/> Unigene686_All, CL2825.Contig2_All, CL3414.Contig5_All,<br/> Unigene6769_All, Unigene1599_All, Unigene29335_All,<br/> CL5142.Contig1_All, Unigene29299_All, CL4013.Contig1_All,<br/> Unigene28320_All, CL1151.Contig3_All, Unigene4625_All,<br/> Unigene11218_All, CL3414.Contig4_All, Unigene2480_All,<br/> CL9189.Contig1_All, Unigene7204_All, Unigene26244_All,<br/> CL1959.Contig2_All, CL5525.Contig2_All, Unigene26311_All,<br/> CL4841.Contig2_All, Unigene25608_All, CL9281.Contig1_All,<br/> CL9281.Contig2_All, CL4242.Contig1_All, CL2088.Contig1_All,<br/> CL4242.Contig2_All, CL1959.Contig1_All, Unigene749_All,<br/> Unigene26585_All, CL4098.Contig2_All, Unigene8059_All,<br/> Unigene22661_All, Unigene27679_All, CL3022.Contig1_All,<br/> CL9915.Contig2_All, CL2088.Contig2_All, Unigene27524_All,<br/> Unigene7481_All, CL4013.Contig2_All, Unigene7623_All<br/> Unigene22560_All, CL3932.Contig2_All, CL2312.Contig1_All,<br/> Unigene2609_All, Unigene27962_All, Unigene953_All,<br/> CL860.Contig3_All, Unigene21846_All, CL9975.Contig1_All,<br/> CL4391.Contig2_All, Unigene28419_All, CL7557.Contig4_All,<br/> CL9609.Contig1_All, Unigene3398_All, CL9104.Contig2_All,<br/> Unigene2112_All, CL7213.Contig1_All, CL1341.Contig2_All,<br/> CL9412.Contig2_All, Unigene708_All, CL3469.Contig5_All,<br/> CL5436.Contig1_All, CL3010.Contig1_All, CL5436.Contig6_All,<br/> Unigene22136_All, CL1803.Contig1_All, CL7093.Contig1_All,<br/> Unigene9167_All, Unigene27273_All, CL7557.Contig1_All,<br/> Unigene3256_All, CL529.Contig3_All, CL7557.Contig2_All,<br/> Unigene27764_All, CL3291.Contig1_All, CL4247.Contig1_All,<br/> CL417.Contig5_All, CL3034.Contig2_All, Unigene3383_All,<br/> CL454.Contig2_All, Unigene5020_All, CL7258.Contig2_All,<br/> CL7324.Contig1_All, CL7165.Contig1_All, CL1803.Contig2_All,<br/> CL49.Contig1_All, Unigene4741_All, CL3469.Contig1_All,<br/> CL1803.Contig3_All, CL8987.Contig2_All, CL5225.Contig1_All,<br/> Unigene5872_All, CL6712.Contig1_All, Unigene5748_All,<br/> CL4667.Contig1_All, CL7020.Contig2_All, CL5488.Contig1_All,<br/> Unigene3291_All, CL1157.Contig2_All, CL7831.Contig2_All,<br/> CL5445.Contig1_All, CL824.Contig2_All, CL6712.Contig2_All,<br/> CL3034.Contig1_All, CL5445.Contig3_All, CL7831.Contig1_All,<br/> CL3932.Contig1_All, Unigene6172_All, CL5445.Contig2_All,<br/> Unigene326_All, Unigene27974_All<br/> CL1623.Contig1_All, Unigene22279_All, CL3787.Contig1_All,<br/> Unigene5913_All, CL1521.Contig2_All, CL1012.Contig10_All,<br/> Unigene28027_All, Unigene11200_All, Unigene3299_All,<br/> CL5977.Contig2_All, CL3063.Contig1_All, CL6788.Contig1_All,</p> |
| 11 | Parkinson's disease   |                                                                                                                                                                                                                                                                                                                                                                                                                                                                                                                                                                                                                                                                                                                                                                                                                                                                                                                                                                                                                                                                                                                                                                                                                                                                                                                                                                                                                                                                                                                                                                                                                                                                                                                                                                                                                                                                                                                                                                                                                                                                                                                                                                                                                                                                                                                                                                                                                                                                                                                                                                                                                                                                                                                                                                                                                                                                                                                                                                                                                                                                                                                                                                                                                                                                                                                                                                                                                                                                                                                                                                                                                                                                                                                                                                                                                                                                                                                                                                                                                                                                                                                                                         |
| 12 | Peroxisome            |                                                                                                                                                                                                                                                                                                                                                                                                                                                                                                                                                                                                                                                                                                                                                                                                                                                                                                                                                                                                                                                                                                                                                                                                                                                                                                                                                                                                                                                                                                                                                                                                                                                                                                                                                                                                                                                                                                                                                                                                                                                                                                                                                                                                                                                                                                                                                                                                                                                                                                                                                                                                                                                                                                                                                                                                                                                                                                                                                                                                                                                                                                                                                                                                                                                                                                                                                                                                                                                                                                                                                                                                                                                                                                                                                                                                                                                                                                                                                                                                                                                                                                                                                         |
| 13 | Alzheimer's disease   |                                                                                                                                                                                                                                                                                                                                                                                                                                                                                                                                                                                                                                                                                                                                                                                                                                                                                                                                                                                                                                                                                                                                                                                                                                                                                                                                                                                                                                                                                                                                                                                                                                                                                                                                                                                                                                                                                                                                                                                                                                                                                                                                                                                                                                                                                                                                                                                                                                                                                                                                                                                                                                                                                                                                                                                                                                                                                                                                                                                                                                                                                                                                                                                                                                                                                                                                                                                                                                                                                                                                                                                                                                                                                                                                                                                                                                                                                                                                                                                                                                                                                                                                                         |

|    |                       |                                                                                                                                                                                                                                                                                                                                                                                                                                                                                                                                                                                                                                                                                                                                                                                                                                                                                                                                                                                                                                                                                                                                                                                                                                                                                                                                                                                                                                                                                                                                                                                                                                                                                                                                        |
|----|-----------------------|----------------------------------------------------------------------------------------------------------------------------------------------------------------------------------------------------------------------------------------------------------------------------------------------------------------------------------------------------------------------------------------------------------------------------------------------------------------------------------------------------------------------------------------------------------------------------------------------------------------------------------------------------------------------------------------------------------------------------------------------------------------------------------------------------------------------------------------------------------------------------------------------------------------------------------------------------------------------------------------------------------------------------------------------------------------------------------------------------------------------------------------------------------------------------------------------------------------------------------------------------------------------------------------------------------------------------------------------------------------------------------------------------------------------------------------------------------------------------------------------------------------------------------------------------------------------------------------------------------------------------------------------------------------------------------------------------------------------------------------|
|    |                       | CL9692.Contig2_All, CL997.Contig1_All, CL6788.Contig2_All, CL3305.Contig4_All, Unigene6334_All, Unigene2532_All, CL9475.Contig2_All, Unigene22956_All, Unigene2447_All, CL3414.Contig2_All, CL5525.Contig1_All, Unigene7840_All, CL2825.Contig2_All, CL3414.Contig5_All, Unigene6769_All, Unigene8619_All, Unigene1599_All, Unigene29335_All, CL5142.Contig1_All, Unigene29299_All, CL4013.Contig1_All, CL2891.Contig3_All, Unigene28320_All, CL1151.Contig3_All, Unigene4625_All, Unigene11218_All, CL3414.Contig4_All, Unigene2480_All, Unigene7204_All, Unigene14682_All, Unigene26244_All, CL1959.Contig2_All, CL5525.Contig2_All, Unigene26311_All, CL4841.Contig2_All, Unigene25608_All, Unigene25786_All, CL9281.Contig1_All, CL9281.Contig2_All, CL2088.Contig1_All, CL1959.Contig1_All, CL2891.Contig1_All, Unigene749_All, CL3894.Contig2_All, Unigene26585_All, CL4098.Contig2_All, Unigene8059_All, Unigene27679_All, CL3022.Contig1_All, CL9915.Contig2_All, CL2088.Contig2_All, Unigene27524_All, Unigene7481_All, CL4013.Contig2_All, Unigene7623_All                                                                                                                                                                                                                                                                                                                                                                                                                                                                                                                                                                                                                                                                   |
| 14 | Butanoate metabolism  | Unigene1665_All, Unigene8070_All, Unigene118_All, Unigene104_All, CL9394.Contig2_All, CL4516.Contig1_All, CL6614.Contig2_All, CL6343.Contig2_All, CL9862.Contig1_All, CL6249.Contig2_All, CL6224.Contig2_All, CL7557.Contig1_All, CL244.Contig3_All, CL5369.Contig1_All, CL2586.Contig1_All, Unigene794_All, CL6916.Contig1_All, CL6614.Contig1_All, CL5475.Contig3_All, CL1735.Contig2_All, CL9394.Contig1_All, Unigene25872_All, CL5369.Contig3_All, CL6224.Contig1_All, CL7342.Contig1_All, CL2367.Contig1_All, CL4474.Contig1_All, CL4657.Contig1_All                                                                                                                                                                                                                                                                                                                                                                                                                                                                                                                                                                                                                                                                                                                                                                                                                                                                                                                                                                                                                                                                                                                                                                              |
| 15 | Retinol metabolism    | Unigene4206_All, CL9384.Contig2_All, Unigene2609_All, Unigene21846_All, CL9975.Contig1_All, CL7557.Contig4_All, CL9609.Contig1_All, Unigene3398_All, CL9087.Contig1_All, CL3204.Contig1_All, Unigene7473_All, CL4435.Contig1_All, CL7213.Contig1_All, Unigene144_All, CL3687.Contig3_All, Unigene708_All, CL8363.Contig1_All, CL3185.Contig1_All, CL3888.Contig1_All, CL2756.Contig1_All, CL7557.Contig1_All, Unigene3256_All, CL7557.Contig2_All, CL9739.Contig2_All, Unigene6213_All, CL454.Contig2_All, Unigene5020_All, CL1341.Contig1_All, CL331.Contig1_All, Unigene492_All, CL6295.Contig2_All, Unigene3287_All, CL6339.Contig3_All, CL1341.Contig3_All, CL3204.Contig3_All, Unigene5872_All, Unigene2804_All, CL1157.Contig2_All, CL5445.Contig1_All, CL9739.Contig1_All, CL7002.Contig2_All, CL5445.Contig3_All, Unigene5837_All, Unigene27434_All, Unigene6172_All, CL5445.Contig2_All, Unigene3171_All, Unigene27974_All, CL9784.Contig1_All, Unigene1665_All, CL5661.Contig1_All, Unigene8070_All, Unigene7838_All, CL731.Contig1_All, Unigene6758_All, CL8398.Contig1_All, CL4516.Contig1_All, CL4623.Contig1_All, Unigene7473_All, CL1079.Contig1_All, CL8398.Contig3_All, CL6343.Contig2_All, CL9955.Contig1_All, CL6249.Contig2_All, Unigene29448_All, CL6224.Contig2_All, CL8736.Contig1_All, Unigene27273_All, Unigene24991_All, Unigene4883_All, Unigene8408_All, CL331.Contig1_All, CL3821.Contig1_All, Unigene794_All, CL6916.Contig1_All, CL2598.Contig1_All, Unigene909_All, Unigene6696_All, Unigene25872_All, CL5903.Contig1_All, CL6224.Contig1_All, CL1028.Contig2_All, CL824.Contig2_All, Unigene22507_All, CL2367.Contig1_All, CL6098.Contig1_All, CL923.Contig1_All, Unigene4972_All, CL4169.Contig1_All |
| 16 | Tryptophan metabolism | CL2780.Contig3_All, CL2664.Contig1_All, CL200.Contig3_All, CL837.Contig2_All, CL4768.Contig1_All, Unigene29100_All, Unigene6820_All, Unigene26386_All, CL837.Contig1_All, CL200.Contig1_All, Unigene26641_All, CL5095.Contig1_All, CL7124.Contig2_All, Unigene6197_All, CL3342.Contig3_All, CL3342.Contig1_All, Unigene4471_All, CL7124.Contig1_All                                                                                                                                                                                                                                                                                                                                                                                                                                                                                                                                                                                                                                                                                                                                                                                                                                                                                                                                                                                                                                                                                                                                                                                                                                                                                                                                                                                    |
| 17 | Galactose metabolism  |                                                                                                                                                                                                                                                                                                                                                                                                                                                                                                                                                                                                                                                                                                                                                                                                                                                                                                                                                                                                                                                                                                                                                                                                                                                                                                                                                                                                                                                                                                                                                                                                                                                                                                                                        |

|    |                                              |                                                                                                                                                                                                                                                                                                                                                                                                                                                                                                                                                                                                                                                                                                                                                                                                                                                                                                                                                                                                                                                                                                                                                                                                                                                                                                                                                                                                                                                                                                                                                                                                                                                                                                                                                                                                                                                                                                                                                                                                                                                                                                                                                                                                                                                                                                                                                                                                                                                                                                                                                                                                                                                                                                                                                                                                                                                                                                                                                                                                                                                                                                                                                                                                                                                                                                                                                                                                                                                                                                                                                                                                                                                                                                                                                                                                               |
|----|----------------------------------------------|---------------------------------------------------------------------------------------------------------------------------------------------------------------------------------------------------------------------------------------------------------------------------------------------------------------------------------------------------------------------------------------------------------------------------------------------------------------------------------------------------------------------------------------------------------------------------------------------------------------------------------------------------------------------------------------------------------------------------------------------------------------------------------------------------------------------------------------------------------------------------------------------------------------------------------------------------------------------------------------------------------------------------------------------------------------------------------------------------------------------------------------------------------------------------------------------------------------------------------------------------------------------------------------------------------------------------------------------------------------------------------------------------------------------------------------------------------------------------------------------------------------------------------------------------------------------------------------------------------------------------------------------------------------------------------------------------------------------------------------------------------------------------------------------------------------------------------------------------------------------------------------------------------------------------------------------------------------------------------------------------------------------------------------------------------------------------------------------------------------------------------------------------------------------------------------------------------------------------------------------------------------------------------------------------------------------------------------------------------------------------------------------------------------------------------------------------------------------------------------------------------------------------------------------------------------------------------------------------------------------------------------------------------------------------------------------------------------------------------------------------------------------------------------------------------------------------------------------------------------------------------------------------------------------------------------------------------------------------------------------------------------------------------------------------------------------------------------------------------------------------------------------------------------------------------------------------------------------------------------------------------------------------------------------------------------------------------------------------------------------------------------------------------------------------------------------------------------------------------------------------------------------------------------------------------------------------------------------------------------------------------------------------------------------------------------------------------------------------------------------------------------------------------------------------------------|
| 18 | Huntington's disease                         | <p>CL9081.Contig1_All, Unigene2497_All, CL9081.Contig2_All, CL1623.Contig1_All, Unigene5244_All, Unigene22279_All, Unigene5913_All, CL1521.Contig2_All, CL1012.Contig10_All, Unigene28027_All, Unigene11200_All, Unigene3299_All, CL5977.Contig2_All, CL3063.Contig1_All, CL6788.Contig1_All, CL2220.Contig1_All, CL6788.Contig2_All, Unigene2081_All, CL3305.Contig4_All, Unigene6334_All, Unigene2532_All, CL9475.Contig2_All, CL9189.Contig2_All, Unigene2447_All, CL3414.Contig2_All, CL5525.Contig1_All, CL2220.Contig2_All, Unigene686_All, Unigene21797_All, CL2825.Contig2_All, CL3414.Contig5_All, Unigene6769_All, Unigene1599_All, Unigene29335_All, Unigene9167_All, CL5142.Contig1_All, Unigene29299_All, CL56.Contig2_All, CL4013.Contig1_All, CL56.Contig1_All, Unigene28320_All, CL1151.Contig3_All, Unigene4625_All, Unigene11218_All, CL3414.Contig4_All, Unigene2480_All, CL9189.Contig1_All, Unigene7204_All, Unigene28505_All, CL7258.Contig2_All, Unigene26244_All, CL1959.Contig2_All, CL5525.Contig2_All, Unigene26311_All, CL4841.Contig2_All, Unigene25608_All, CL9281.Contig1_All, CL9281.Contig2_All, CL4242.Contig1_All, CL2535.Contig2_All, CL2088.Contig1_All, CL4242.Contig2_All, CL1959.Contig1_All, Unigene749_All, Unigene26585_All, CL4098.Contig2_All, Unigene8059_All, Unigene27679_All, CL3022.Contig1_All, CL9915.Contig2_All, CL2088.Contig2_All, Unigene27524_All, Unigene7481_All, CL4013.Contig2_All, Unigene7623_All, CL9784.Contig1_All, CL7841.Contig1_All, CL3798.Contig1_All, CL8564.Contig2_All, CL1868.Contig3_All, Unigene6758_All, CL5897.Contig1_All, CL8398.Contig1_All, CL4623.Contig1_All, CL1079.Contig1_All, CL2270.Contig1_All, CL8398.Contig3_All, CL9955.Contig1_All, CL3469.Contig5_All, CL1054.Contig1_All, CL8736.Contig1_All, CL8564.Contig1_All, Unigene24991_All, Unigene8408_All, CL8392.Contig1_All, CL331.Contig1_All, CL3469.Contig1_All, CL2598.Contig1_All, CL7841.Contig3_All, Unigene909_All, Unigene8149_All, Unigene3207_All, CL8664.Contig3_All, CL8508.Contig1_All, CL8306.Contig1_All, CL2291.Contig2_All, CL5903.Contig1_All, CL1028.Contig2_All, CL1936.Contig1_All, Unigene22507_All, CL8664.Contig1_All, CL6098.Contig1_All, CL8306.Contig2_All, CL923.Contig1_All, CL5082.Contig2_All, CL3543.Contig2_All, CL5383.Contig2_All, CL4391.Contig2_All, CL7647.Contig1_All, Unigene21985_All, CL6249.Contig2_All, CL6224.Contig2_All, CL4939.Contig1_All, Unigene27273_All, Unigene27764_All, CL2490.Contig1_All, Unigene10036_All, CL7286.Contig1_All, CL5476.Contig2_All, Unigene7581_All, CL8268.Contig2_All, CL8268.Contig3_All, Unigene5748_All, CL6224.Contig1_All, CL824.Contig2_All, CL3543.Contig1_All, CL5476.Contig1_All, Unigene3110_All, CL3932.Contig2_All, CL2312.Contig1_All, CL1167.Contig1_All, Unigene28419_All, Unigene9626_All, CL9394.Contig2_All, Unigene26016_All, CL1341.Contig2_All, CL9400.Contig1_All, CL5436.Contig1_All, CL3010.Contig1_All, CL5436.Contig6_All, CL1803.Contig1_All, CL1060.Contig3_All, CL417.Contig5_All, CL3034.Contig2_All, CL5718.Contig2_All, CL1803.Contig2_All, Unigene4741_All, CL1803.Contig3_All, CL3953.Contig2_All, CL6712.Contig1_All, Unigene29387_All, CL9394.Contig1_All, CL3507.Contig1_All, CL4667.Contig1_All, CL6712.Contig2_All, CL3034.Contig1_All, CL3932.Contig1_All, CL9384.Contig2_All, CL611.Contig2_All, Unigene27409_All, Unigene28889_All, CL3833.Contig2_All, Unigene6389_All, Unigene6758_All, CL8398.Contig1_All, Unigene28933_All, CL5647.Contig3_All, CL9087.Contig1_All, CL3204.Contig1_All, Unigene7473_All, CL4435.Contig1_All, CL8398.Contig3_All, CL5462.Contig1_All, CL3687.Contig3_All, CL8363.Contig1_All, Unigene27153_All, CL4808.Contig1_All, Unigene21637_All, CL5647.Contig4_All, CL5647.Contig1_All, CL2476.Contig2_All,</p> |
| 19 | Arginine and proline metabolism              | <p>Unigene24991_All, Unigene8408_All, CL8392.Contig1_All, CL331.Contig1_All, CL3469.Contig1_All, CL2598.Contig1_All, CL7841.Contig3_All, Unigene909_All, Unigene8149_All, Unigene3207_All, CL8664.Contig3_All, CL8508.Contig1_All, CL8306.Contig1_All, CL2291.Contig2_All, CL5903.Contig1_All, CL1028.Contig2_All, CL1936.Contig1_All, Unigene22507_All, CL8664.Contig1_All, CL6098.Contig1_All, CL8306.Contig2_All, CL923.Contig1_All, CL5082.Contig2_All, CL3543.Contig2_All, CL5383.Contig2_All, CL4391.Contig2_All, CL7647.Contig1_All, Unigene21985_All, CL6249.Contig2_All, CL6224.Contig2_All, CL4939.Contig1_All, Unigene27273_All, Unigene27764_All, CL2490.Contig1_All, Unigene10036_All, CL7286.Contig1_All, CL5476.Contig2_All, Unigene7581_All, CL8268.Contig2_All, CL8268.Contig3_All, Unigene5748_All, CL6224.Contig1_All, CL824.Contig2_All, CL3543.Contig1_All, CL5476.Contig1_All, Unigene3110_All, CL3932.Contig2_All, CL2312.Contig1_All, CL1167.Contig1_All, Unigene28419_All, Unigene9626_All, CL9394.Contig2_All, Unigene26016_All, CL1341.Contig2_All, CL9400.Contig1_All, CL5436.Contig1_All, CL3010.Contig1_All, CL5436.Contig6_All, CL1803.Contig1_All, CL1060.Contig3_All, CL417.Contig5_All, CL3034.Contig2_All, CL5718.Contig2_All, CL1803.Contig2_All, Unigene4741_All, CL1803.Contig3_All, CL3953.Contig2_All, CL6712.Contig1_All, Unigene29387_All, CL9394.Contig1_All, CL3507.Contig1_All, CL4667.Contig1_All, CL6712.Contig2_All, CL3034.Contig1_All, CL3932.Contig1_All, CL9384.Contig2_All, CL611.Contig2_All, Unigene27409_All, Unigene28889_All, CL3833.Contig2_All, Unigene6389_All, Unigene6758_All, CL8398.Contig1_All, Unigene28933_All, CL5647.Contig3_All, CL9087.Contig1_All, CL3204.Contig1_All, Unigene7473_All, CL4435.Contig1_All, CL8398.Contig3_All, CL5462.Contig1_All, CL3687.Contig3_All, CL8363.Contig1_All, Unigene27153_All, CL4808.Contig1_All, Unigene21637_All, CL5647.Contig4_All, CL5647.Contig1_All, CL2476.Contig2_All,</p>                                                                                                                                                                                                                                                                                                                                                                                                                                                                                                                                                                                                                                                                                                                                                                                                                                                                                                                                                                                                                                                                                                                                                                                                                                                                                                                                                                                                                                                                                                                                                                                                                                                                                                                                                                                                                  |
| 20 | Glyoxylate and dicarboxylate metabolism      | <p>Unigene27764_All, CL2490.Contig1_All, Unigene10036_All, CL7286.Contig1_All, CL5476.Contig2_All, Unigene7581_All, CL8268.Contig2_All, CL8268.Contig3_All, Unigene5748_All, CL6224.Contig1_All, CL824.Contig2_All, CL3543.Contig1_All, CL5476.Contig1_All, Unigene3110_All, CL3932.Contig2_All, CL2312.Contig1_All, CL1167.Contig1_All, Unigene28419_All, Unigene9626_All, CL9394.Contig2_All, Unigene26016_All, CL1341.Contig2_All, CL9400.Contig1_All, CL5436.Contig1_All, CL3010.Contig1_All, CL5436.Contig6_All, CL1803.Contig1_All, CL1060.Contig3_All, CL417.Contig5_All, CL3034.Contig2_All, CL5718.Contig2_All, CL1803.Contig2_All, Unigene4741_All, CL1803.Contig3_All, CL3953.Contig2_All, CL6712.Contig1_All, Unigene29387_All, CL9394.Contig1_All, CL3507.Contig1_All, CL4667.Contig1_All, CL6712.Contig2_All, CL3034.Contig1_All, CL3932.Contig1_All, CL9384.Contig2_All, CL611.Contig2_All, Unigene27409_All, Unigene28889_All, CL3833.Contig2_All, Unigene6389_All, Unigene6758_All, CL8398.Contig1_All, Unigene28933_All, CL5647.Contig3_All, CL9087.Contig1_All, CL3204.Contig1_All, Unigene7473_All, CL4435.Contig1_All, CL8398.Contig3_All, CL5462.Contig1_All, CL3687.Contig3_All, CL8363.Contig1_All, Unigene27153_All, CL4808.Contig1_All, Unigene21637_All, CL5647.Contig4_All, CL5647.Contig1_All, CL2476.Contig2_All,</p>                                                                                                                                                                                                                                                                                                                                                                                                                                                                                                                                                                                                                                                                                                                                                                                                                                                                                                                                                                                                                                                                                                                                                                                                                                                                                                                                                                                                                                                                                                                                                                                                                                                                                                                                                                                                                                                                                                                                                                                                                                                                                                                                                                                                                                                                                                                                                                                                                                                           |
| 21 | PPAR signaling pathway                       | <p>Unigene27764_All, CL2490.Contig1_All, Unigene10036_All, CL7286.Contig1_All, CL5476.Contig2_All, Unigene7581_All, CL8268.Contig2_All, CL8268.Contig3_All, Unigene5748_All, CL6224.Contig1_All, CL824.Contig2_All, CL3543.Contig1_All, CL5476.Contig1_All, Unigene3110_All, CL3932.Contig2_All, CL2312.Contig1_All, CL1167.Contig1_All, Unigene28419_All, Unigene9626_All, CL9394.Contig2_All, Unigene26016_All, CL1341.Contig2_All, CL9400.Contig1_All, CL5436.Contig1_All, CL3010.Contig1_All, CL5436.Contig6_All, CL1803.Contig1_All, CL1060.Contig3_All, CL417.Contig5_All, CL3034.Contig2_All, CL5718.Contig2_All, CL1803.Contig2_All, Unigene4741_All, CL1803.Contig3_All, CL3953.Contig2_All, CL6712.Contig1_All, Unigene29387_All, CL9394.Contig1_All, CL3507.Contig1_All, CL4667.Contig1_All, CL6712.Contig2_All, CL3034.Contig1_All, CL3932.Contig1_All, CL9384.Contig2_All, CL611.Contig2_All, Unigene27409_All, Unigene28889_All, CL3833.Contig2_All, Unigene6389_All, Unigene6758_All, CL8398.Contig1_All, Unigene28933_All, CL5647.Contig3_All, CL9087.Contig1_All, CL3204.Contig1_All, Unigene7473_All, CL4435.Contig1_All, CL8398.Contig3_All, CL5462.Contig1_All, CL3687.Contig3_All, CL8363.Contig1_All, Unigene27153_All, CL4808.Contig1_All, Unigene21637_All, CL5647.Contig4_All, CL5647.Contig1_All, CL2476.Contig2_All,</p>                                                                                                                                                                                                                                                                                                                                                                                                                                                                                                                                                                                                                                                                                                                                                                                                                                                                                                                                                                                                                                                                                                                                                                                                                                                                                                                                                                                                                                                                                                                                                                                                                                                                                                                                                                                                                                                                                                                                                                                                                                                                                                                                                                                                                                                                                                                                                                                                                                                           |
| 22 | Metabolism of xenobiotics by cytochrome P450 | <p>Unigene27764_All, CL2490.Contig1_All, Unigene10036_All, CL7286.Contig1_All, CL5476.Contig2_All, Unigene7581_All, CL8268.Contig2_All, CL8268.Contig3_All, Unigene5748_All, CL6224.Contig1_All, CL824.Contig2_All, CL3543.Contig1_All, CL5476.Contig1_All, Unigene3110_All, CL3932.Contig2_All, CL2312.Contig1_All, CL1167.Contig1_All, Unigene28419_All, Unigene9626_All, CL9394.Contig2_All, Unigene26016_All, CL1341.Contig2_All, CL9400.Contig1_All, CL5436.Contig1_All, CL3010.Contig1_All, CL5436.Contig6_All, CL1803.Contig1_All, CL1060.Contig3_All, CL417.Contig5_All, CL3034.Contig2_All, CL5718.Contig2_All, CL1803.Contig2_All, Unigene4741_All, CL1803.Contig3_All, CL3953.Contig2_All, CL6712.Contig1_All, Unigene29387_All, CL9394.Contig1_All, CL3507.Contig1_All, CL4667.Contig1_All, CL6712.Contig2_All, CL3034.Contig1_All, CL3932.Contig1_All, CL9384.Contig2_All, CL611.Contig2_All, Unigene27409_All, Unigene28889_All, CL3833.Contig2_All, Unigene6389_All, Unigene6758_All, CL8398.Contig1_All, Unigene28933_All, CL5647.Contig3_All, CL9087.Contig1_All, CL3204.Contig1_All, Unigene7473_All, CL4435.Contig1_All, CL8398.Contig3_All, CL5462.Contig1_All, CL3687.Contig3_All, CL8363.Contig1_All, Unigene27153_All, CL4808.Contig1_All, Unigene21637_All, CL5647.Contig4_All, CL5647.Contig1_All, CL2476.Contig2_All,</p>                                                                                                                                                                                                                                                                                                                                                                                                                                                                                                                                                                                                                                                                                                                                                                                                                                                                                                                                                                                                                                                                                                                                                                                                                                                                                                                                                                                                                                                                                                                                                                                                                                                                                                                                                                                                                                                                                                                                                                                                                                                                                                                                                                                                                                                                                                                                                                                                                                                           |

|    |                                                                   |                                                                                                                                                                                                                                                                                                                                                                                                                                                                                                                                                                                                                                                                                                                                                                                                                                                                                                                                                                                                                                                                                                                                                                                                                                                                                                                                                                                                                                                                                                                                                                                                                                                                                                                                                                                                                                                                                                                                                                                                                                                                                                                                                                                                                                                                                                                                                                                                                                                                                                                                                                                                                                                                                                                                                                                                                                                                                                                                                                                                                                                                                                                                                                                                                                                                                                                                                                                                                                                                                                                                                                                                                                                                                                                                                            |
|----|-------------------------------------------------------------------|------------------------------------------------------------------------------------------------------------------------------------------------------------------------------------------------------------------------------------------------------------------------------------------------------------------------------------------------------------------------------------------------------------------------------------------------------------------------------------------------------------------------------------------------------------------------------------------------------------------------------------------------------------------------------------------------------------------------------------------------------------------------------------------------------------------------------------------------------------------------------------------------------------------------------------------------------------------------------------------------------------------------------------------------------------------------------------------------------------------------------------------------------------------------------------------------------------------------------------------------------------------------------------------------------------------------------------------------------------------------------------------------------------------------------------------------------------------------------------------------------------------------------------------------------------------------------------------------------------------------------------------------------------------------------------------------------------------------------------------------------------------------------------------------------------------------------------------------------------------------------------------------------------------------------------------------------------------------------------------------------------------------------------------------------------------------------------------------------------------------------------------------------------------------------------------------------------------------------------------------------------------------------------------------------------------------------------------------------------------------------------------------------------------------------------------------------------------------------------------------------------------------------------------------------------------------------------------------------------------------------------------------------------------------------------------------------------------------------------------------------------------------------------------------------------------------------------------------------------------------------------------------------------------------------------------------------------------------------------------------------------------------------------------------------------------------------------------------------------------------------------------------------------------------------------------------------------------------------------------------------------------------------------------------------------------------------------------------------------------------------------------------------------------------------------------------------------------------------------------------------------------------------------------------------------------------------------------------------------------------------------------------------------------------------------------------------------------------------------------------------------|
|    |                                                                   | CL8338.Contig2_All, Unigene6213_All, Unigene8408_All, Unigene7663_All, CL331.Contig1_All, Unigene492_All, CL6295.Contig2_All, CL3833.Contig1_All, CL5522.Contig1_All, CL6435.Contig1_All, Unigene5482_All, CL6339.Contig3_All, CL2598.Contig1_All, Unigene28054_All, CL3204.Contig3_All, CL8622.Contig1_All, CL5638.Contig2_All, Unigene2804_All, Unigene26168_All, CL6098.Contig1_All, CL7002.Contig2_All, CL923.Contig1_All, Unigene5837_All, Unigene21428_All, CL9767.Contig2_All, CL3815.Contig1_All, CL9241.Contig2_All, Unigene22338_All, Unigene4651_All, CL200.Contig3_All, CL4031.Contig2_All, CL9241.Contig1_All, CL9247.Contig2_All, Unigene6068_All, CL9247.Contig1_All, CL200.Contig1_All, CL4585.Contig1_All, Unigene1544_All, CL3342.Contig3_All, CL3809.Contig2_All, CL3342.Contig1_All, CL2540.Contig1_All, CL5016.Contig2_All, CL9081.Contig1_All, CL2972.Contig2_All, Unigene7850_All, CL9081.Contig2_All, CL9384.Contig2_All, Unigene27409_All, CL3833.Contig2_All, Unigene6389_All, Unigene6758_All, CL8398.Contig1_All, Unigene28933_All, CL1670.Contig6_All, CL9087.Contig1_All, CL3204.Contig1_All, Unigene7473_All, CL4435.Contig1_All, CL8398.Contig3_All, CL5462.Contig1_All, CL3687.Contig3_All, CL8363.Contig1_All, Unigene27153_All, CL1670.Contig5_All, Unigene21637_All, CL6660.Contig1_All, Unigene28056_All, CL2476.Contig2_All, CL8338.Contig2_All, Unigene6213_All, Unigene8408_All, CL331.Contig1_All, Unigene492_All, CL6295.Contig2_All, CL3833.Contig1_All, Unigene5482_All, CL6339.Contig3_All, CL2598.Contig1_All, Unigene28054_All, CL3204.Contig3_All, CL8622.Contig1_All, CL5638.Contig2_All, Unigene26168_All, CL6098.Contig1_All, Unigene6866_All, CL7002.Contig2_All, CL923.Contig1_All, Unigene5837_All, CL1670.Contig4_All, Unigene21428_All, CL9784.Contig1_All, Unigene1665_All, Unigene8070_All, CL731.Contig1_All, Unigene6758_All, CL8398.Contig1_All, CL4516.Contig1_All, CL4134.Contig5_All, CL1079.Contig1_All, CL8398.Contig3_All, CL6343.Contig2_All, CL9955.Contig1_All, CL6249.Contig2_All, Unigene29448_All, CL6224.Contig2_All, Unigene8408_All, CL331.Contig1_All, Unigene794_All, CL6916.Contig1_All, CL2598.Contig1_All, Unigene25872_All, CL6224.Contig1_All, CL1028.Contig2_All, CL2367.Contig1_All, CL6098.Contig1_All, CL923.Contig1_All, Unigene4972_All, Unigene8070_All, CL2312.Contig1_All, CL2047.Contig2_All, Unigene28419_All, CL4516.Contig1_All, CL1341.Contig2_All, CL1803.Contig1_All, CL417.Contig5_All, CL1803.Contig2_All, Unigene4741_All, CL1735.Contig2_All, CL1803.Contig3_All, CL6712.Contig1_All, Unigene29387_All, CL5445.Contig1_All, CL6712.Contig2_All, CL5445.Contig2_All, Unigene5244_All, CL4988.Contig1_All, Unigene27409_All, CL2660.Contig1_All, CL3833.Contig2_All, CL9241.Contig2_All, Unigene6389_All, CL4031.Contig2_All, Unigene2081_All, Unigene28933_All, CL9241.Contig1_All, CL5462.Contig1_All, Unigene24067_All, Unigene27153_All, Unigene21797_All, CL8471.Contig1_All, Unigene21637_All, CL2476.Contig2_All, CL8338.Contig2_All, CL234.Contig2_All, CL4988.Contig3_All, CL8479.Contig1_All, CL959.Contig2_All, Unigene28505_All, Unigene7563_All, CL3332.Contig1_All, CL3833.Contig1_All, CL4585.Contig1_All, Unigene5482_All, Unigene28054_All, CL8622.Contig1_All, CL5638.Contig2_All, Unigene3207_All, Unigene6249_All, CL8479.Contig2_All, Unigene26168_All, CL7831.Contig2_All, CL8471.Contig2_All, CL7831.Contig1_All, Unigene21428_All, CL573.Contig1_All, CL8564.Contig2_All, CL573.Contig2_All, Unigene6758_All, CL8398.Contig1_All, CL4623.Contig1_All, Unigene1201_All, CL6584.Contig1_All, CL8398.Contig3_All, Unigene28629_All, CL8736.Contig1_All, CL8564.Contig1_All, Unigene24991_All, Unigene8408_All, Unigene27775_All, |
| 23 | Pentose phosphate pathway                                         |                                                                                                                                                                                                                                                                                                                                                                                                                                                                                                                                                                                                                                                                                                                                                                                                                                                                                                                                                                                                                                                                                                                                                                                                                                                                                                                                                                                                                                                                                                                                                                                                                                                                                                                                                                                                                                                                                                                                                                                                                                                                                                                                                                                                                                                                                                                                                                                                                                                                                                                                                                                                                                                                                                                                                                                                                                                                                                                                                                                                                                                                                                                                                                                                                                                                                                                                                                                                                                                                                                                                                                                                                                                                                                                                                            |
| 24 | Drug metabolism - cytochrome P450                                 |                                                                                                                                                                                                                                                                                                                                                                                                                                                                                                                                                                                                                                                                                                                                                                                                                                                                                                                                                                                                                                                                                                                                                                                                                                                                                                                                                                                                                                                                                                                                                                                                                                                                                                                                                                                                                                                                                                                                                                                                                                                                                                                                                                                                                                                                                                                                                                                                                                                                                                                                                                                                                                                                                                                                                                                                                                                                                                                                                                                                                                                                                                                                                                                                                                                                                                                                                                                                                                                                                                                                                                                                                                                                                                                                                            |
| 25 | Lysine degradation                                                |                                                                                                                                                                                                                                                                                                                                                                                                                                                                                                                                                                                                                                                                                                                                                                                                                                                                                                                                                                                                                                                                                                                                                                                                                                                                                                                                                                                                                                                                                                                                                                                                                                                                                                                                                                                                                                                                                                                                                                                                                                                                                                                                                                                                                                                                                                                                                                                                                                                                                                                                                                                                                                                                                                                                                                                                                                                                                                                                                                                                                                                                                                                                                                                                                                                                                                                                                                                                                                                                                                                                                                                                                                                                                                                                                            |
| 26 | Biosynthesis of unsaturated fatty acids (no map in kegg database) |                                                                                                                                                                                                                                                                                                                                                                                                                                                                                                                                                                                                                                                                                                                                                                                                                                                                                                                                                                                                                                                                                                                                                                                                                                                                                                                                                                                                                                                                                                                                                                                                                                                                                                                                                                                                                                                                                                                                                                                                                                                                                                                                                                                                                                                                                                                                                                                                                                                                                                                                                                                                                                                                                                                                                                                                                                                                                                                                                                                                                                                                                                                                                                                                                                                                                                                                                                                                                                                                                                                                                                                                                                                                                                                                                            |
| 27 | Glutathione metabolism                                            |                                                                                                                                                                                                                                                                                                                                                                                                                                                                                                                                                                                                                                                                                                                                                                                                                                                                                                                                                                                                                                                                                                                                                                                                                                                                                                                                                                                                                                                                                                                                                                                                                                                                                                                                                                                                                                                                                                                                                                                                                                                                                                                                                                                                                                                                                                                                                                                                                                                                                                                                                                                                                                                                                                                                                                                                                                                                                                                                                                                                                                                                                                                                                                                                                                                                                                                                                                                                                                                                                                                                                                                                                                                                                                                                                            |
| 28 | Phenylalanine metabolism                                          |                                                                                                                                                                                                                                                                                                                                                                                                                                                                                                                                                                                                                                                                                                                                                                                                                                                                                                                                                                                                                                                                                                                                                                                                                                                                                                                                                                                                                                                                                                                                                                                                                                                                                                                                                                                                                                                                                                                                                                                                                                                                                                                                                                                                                                                                                                                                                                                                                                                                                                                                                                                                                                                                                                                                                                                                                                                                                                                                                                                                                                                                                                                                                                                                                                                                                                                                                                                                                                                                                                                                                                                                                                                                                                                                                            |

|    |                                             |                                                                                                                                                                                                                                                                                                                                                                                                                                                                                                                                                                                                                                                       |
|----|---------------------------------------------|-------------------------------------------------------------------------------------------------------------------------------------------------------------------------------------------------------------------------------------------------------------------------------------------------------------------------------------------------------------------------------------------------------------------------------------------------------------------------------------------------------------------------------------------------------------------------------------------------------------------------------------------------------|
|    |                                             | Unigene4612_All, CL331.Contig1_All, CL2598.Contig1_All, Unigene909_All, CL5903.Contig1_All, Unigene22507_All, CL6098.Contig1_All, CL8754.Contig2_All, CL6584.Contig3_All, CL923.Contig1_All, CL5082.Contig2_All                                                                                                                                                                                                                                                                                                                                                                                                                                       |
| 29 | Glycerolipid metabolism                     | CL9784.Contig1_All, CL1181.Contig3_All, Unigene6758_All, CL837.Contig2_All, CL8398.Contig1_All, CL1079.Contig1_All, CL8398.Contig3_All, CL9955.Contig1_All, CL4768.Contig1_All, Unigene5129_All, CL4126.Contig1_All, CL837.Contig1_All, Unigene8408_All, CL3242.Contig2_All, Unigene26641_All, CL5095.Contig1_All, CL331.Contig1_All, CL7124.Contig2_All, Unigene6197_All, CL2598.Contig1_All, CL1028.Contig2_All, CL6098.Contig1_All, Unigene601_All, CL923.Contig1_All, CL7124.Contig1_All, Unigene2497_All                                                                                                                                         |
| 30 | Starch and sucrose metabolism               | CL2780.Contig3_All, CL9384.Contig2_All, CL213.Contig4_All, CL6902.Contig4_All, CL200.Contig3_All, CL3579.Contig2_All, CL4435.Contig1_All, CL9247.Contig2_All, CL3687.Contig3_All, CL6902.Contig1_All, CL9247.Contig1_All, CL213.Contig3_All, Unigene29100_All, CL200.Contig1_All, CL6295.Contig2_All, CL3342.Contig3_All, CL8984.Contig3_All, CL3342.Contig1_All, Unigene4471_All, CL3579.Contig1_All, Unigene22681_All, CL8984.Contig2_All                                                                                                                                                                                                           |
| 31 | Synthesis and degradation of ketone bodies  | CL9394.Contig2_All, CL6249.Contig2_All, CL6224.Contig2_All, CL7557.Contig1_All, CL244.Contig3_All, CL9394.Contig1_All, CL6224.Contig1_All                                                                                                                                                                                                                                                                                                                                                                                                                                                                                                             |
| 32 | Alanine, aspartate and glutamate metabolism | CL7107.Contig2_All, CL3798.Contig1_All, CL8564.Contig2_All, Unigene22665_All, CL5398.Contig1_All, CL6614.Contig2_All, CL3033.Contig1_All, CL8564.Contig1_All, Unigene27764_All, CL5369.Contig1_All, CL6614.Contig1_All, CL443.Contig1_All, CL8664.Contig3_All, Unigene5748_All, CL5369.Contig3_All, CL7107.Contig1_All, CL8664.Contig1_All, CL443.Contig3_All, CL4695.Contig3_All, CL5082.Contig2_All                                                                                                                                                                                                                                                 |
| 33 | Tyrosine metabolism                         | CL573.Contig1_All, CL8564.Contig2_All, Unigene26224_All, CL573.Contig2_All, Unigene6758_All, CL8398.Contig1_All, CL9087.Contig1_All, CL3204.Contig1_All, Unigene1201_All, CL8398.Contig3_All, CL8363.Contig1_All, CL8564.Contig1_All, Unigene6213_All, Unigene8408_All, Unigene27775_All, Unigene4612_All, CL331.Contig1_All, Unigene492_All, CL6339.Contig3_All, CL2598.Contig1_All, CL3204.Contig3_All, CL6098.Contig1_All, CL10058.Contig2_All, CL7002.Contig2_All, CL923.Contig1_All, Unigene5837_All, CL5082.Contig2_All                                                                                                                         |
| 34 | Mismatch repair                             | Unigene7602_All, Unigene22773_All, CL3399.Contig3_All, Unigene2458_All                                                                                                                                                                                                                                                                                                                                                                                                                                                                                                                                                                                |
|    |                                             | CL2780.Contig3_All, CL9384.Contig2_All, CL611.Contig2_All, Unigene28889_All, Unigene6758_All, CL837.Contig2_All, CL8398.Contig1_All, CL4435.Contig1_All, CL8398.Contig3_All, CL3687.Contig3_All, CL9955.Contig1_All, CL4808.Contig1_All, CL7557.Contig1_All, Unigene3256_All, CL7557.Contig2_All, CL837.Contig1_All, Unigene8408_All, Unigene7663_All, Unigene26641_All, CL5095.Contig1_All, CL331.Contig1_All, CL7124.Contig2_All, CL6295.Contig2_All, Unigene6197_All, CL2598.Contig1_All, Unigene29389_All, CL1028.Contig2_All, CL5445.Contig1_All, CL6098.Contig1_All, CL923.Contig1_All, CL5445.Contig3_All, CL7124.Contig1_All, Unigene2497_All |
| 35 | Pentose and glucuronate interconversions    | Unigene5244_All, CL5661.Contig1_All, Unigene7838_All, Unigene27409_All, CL2660.Contig1_All, CL3833.Contig2_All, CL7104.Contig1_All, Unigene6389_All, Unigene2081_All, Unigene28933_All, CL5462.Contig1_All, Unigene27153_All, Unigene21797_All, CL5352.Contig2_All, Unigene21637_All, CL2476.Contig2_All, Unigene4883_All, CL2200.Contig1_All, Unigene28505_All, CL3332.Contig1_All, CL3821.Contig1_All, CL3833.Contig1_All, Unigene5482_All, CL8622.Contig1_All, Unigene6696_All, CL5638.Contig2_All, Unigene2804_All, Unigene26168_All, CL4169.Contig1_All, Unigene21428_All                                                                        |
| 36 | Arachidonic acid metabolism                 | CL2029.Contig1_All, Unigene27831_All, CL2664.Contig1_All, CL768.Contig3_All, CL2717.Contig2_All, Unigene22014_All,                                                                                                                                                                                                                                                                                                                                                                                                                                                                                                                                    |
| 37 | Lysosome                                    |                                                                                                                                                                                                                                                                                                                                                                                                                                                                                                                                                                                                                                                       |



|    |                                          |                                                                                                                                                                                                                                                                                                                                                                                                                                                                                                                                                                                                                                                                                                                                                                                                                                                                                                                                                                                                                                                     |
|----|------------------------------------------|-----------------------------------------------------------------------------------------------------------------------------------------------------------------------------------------------------------------------------------------------------------------------------------------------------------------------------------------------------------------------------------------------------------------------------------------------------------------------------------------------------------------------------------------------------------------------------------------------------------------------------------------------------------------------------------------------------------------------------------------------------------------------------------------------------------------------------------------------------------------------------------------------------------------------------------------------------------------------------------------------------------------------------------------------------|
|    |                                          | CL4004.Contig3_All, CL9293.Contig2_All, Unigene24033_All, CL4271.Contig1_All, Unigene2393_All, Unigene4264_All, Unigene7683_All, CL3279.Contig1_All, CL2220.Contig1_All, CL8183.Contig3_All, CL846.Contig2_All, CL3330.Contig1_All, CL2258.Contig1_All, CL3400.Contig1_All, CL846.Contig4_All, Unigene3191_All, Unigene2513_All, CL9588.Contig1_All, CL4768.Contig1_All, CL2220.Contig2_All, Unigene74_All, CL9252.Contig1_All, CL3388.Contig1_All, CL4281.Contig2_All, CL4271.Contig3_All, CL608.Contig4_All, CL445.Contig1_All, Unigene6964_All, Unigene2773_All, CL6059.Contig2_All, CL2258.Contig13_All, CL4456.Contig3_All, CL818.Contig1_All, Unigene917_All, CL7288.Contig1_All, CL701.Contig1_All, CL9776.Contig1_All, Unigene11930_All, Unigene29428_All, CL7190.Contig1_All, Unigene4235_All                                                                                                                                                                                                                                              |
| 38 | alpha-Linolenic acid metabolism          | CL2312.Contig1_All, Unigene28419_All, CL1341.Contig2_All, CL1803.Contig1_All, CL417.Contig5_All, CL1803.Contig2_All, Unigene4741_All, CL1803.Contig3_All, CL6712.Contig1_All, Unigene29387_All, CL6712.Contig2_All                                                                                                                                                                                                                                                                                                                                                                                                                                                                                                                                                                                                                                                                                                                                                                                                                                  |
| 39 | Fatty acid elongation                    | Unigene1665_All, Unigene8070_All, CL2047.Contig2_All, CL7504.Contig1_All, CL4516.Contig1_All, CL7504.Contig2_All, CL6343.Contig2_All, Unigene794_All, CL6916.Contig1_All, CL1735.Contig2_All, Unigene25872_All, CL2367.Contig1_All, Unigene8364_All, CL5986.Contig2_All, CL5986.Contig1_All, CL9723.Contig2_All, CL2717.Contig2_All, CL846.Contig2_All, CL554.Contig1_All, CL846.Contig4_All, Unigene2513_All, CL9252.Contig1_All, Unigene4416_All, CL2170.Contig4_All, CL2170.Contig3_All, CL6059.Contig2_All, CL6826.Contig1_All, CL3382.Contig2_All, CL6826.Contig2_All, CL554.Contig2_All, CL8738.Contig2_All, Unigene26102_All, CL5886.Contig1_All, CL328.Contig2_All, CL5497.Contig1_All, Unigene23556_All, Unigene4416_All, CL4294.Contig3_All, Unigene26870_All, CL785.Contig2_All, CL2070.Contig1_All, CL170.Contig5_All, Unigene636_All, CL3920.Contig3_All, CL342.Contig5_All, CL572.Contig1_All, CL8274.Contig3_All                                                                                                                     |
| 40 | Rheumatoid arthritis                     | CL9384.Contig2_All, CL5108.Contig2_All, CL4435.Contig1_All, CL3687.Contig3_All, CL7299.Contig1_All, CL7299.Contig2_All, CL5782.Contig2_All, CL5782.Contig1_All, CL6295.Contig2_All, Unigene28268_All                                                                                                                                                                                                                                                                                                                                                                                                                                                                                                                                                                                                                                                                                                                                                                                                                                                |
| 41 | ECM-receptor interaction                 | Unigene7602_All, Unigene22773_All, CL3399.Contig3_All, Unigene2458_All                                                                                                                                                                                                                                                                                                                                                                                                                                                                                                                                                                                                                                                                                                                                                                                                                                                                                                                                                                              |
| 42 | Porphyrin and chlorophyll metabolism     | Unigene118_All, CL3815.Contig1_All, CL8538.Contig1_All, Unigene22338_All, Unigene104_All, CL837.Contig2_All, CL7505.Contig2_All, Unigene6068_All, CL8538.Contig2_All, CL837.Contig1_All, Unigene26641_All, CL5095.Contig1_All, CL7124.Contig2_All, Unigene6197_All, Unigene1544_All, CL1735.Contig2_All, CL3809.Contig2_All, Unigene28039_All, CL7124.Contig1_All, CL9081.Contig1_All, CL4657.Contig1_All, Unigene7850_All, Unigene2497_All, CL9081.Contig2_All, CL9784.Contig1_All, CL6939.Contig2_All, CL7944.Contig3_All, CL5398.Contig1_All, CL3469.Contig5_All, CL8146.Contig4_All, CL6506.Contig1_All, Unigene26422_All, CL4939.Contig1_All, Unigene27764_All, CL674.Contig5_All, CL3469.Contig1_All, Unigene5748_All, CL7409.Contig1_All, CL5346.Contig1_All, CL9784.Contig1_All, Unigene6758_All, CL8398.Contig1_All, CL1079.Contig1_All, CL8398.Contig3_All, CL9955.Contig1_All, Unigene8408_All, CL331.Contig1_All, CL2598.Contig1_All, CL8306.Contig1_All, CL1028.Contig2_All, CL6098.Contig1_All, CL8306.Contig2_All, CL923.Contig1_All |
| 43 | DNA replication                          | CL9784.Contig1_All, CL9384.Contig2_All, Unigene6758_All, CL8398.Contig1_All, CL1079.Contig1_All, CL4435.Contig1_All, CL8398.Contig3_All, CL3687.Contig3_All, CL9955.Contig1_All, Unigene8408_All, CL331.Contig1_All, CL6295.Contig2_All, CL2598.Contig1_All, CL1028.Contig2_All, CL6098.Contig1_All, CL923.Contig1_All                                                                                                                                                                                                                                                                                                                                                                                                                                                                                                                                                                                                                                                                                                                              |
| 44 | Fructose and mannose metabolism          | CL9394.Contig2_All, CL6249.Contig2_All, CL6224.Contig2_All,                                                                                                                                                                                                                                                                                                                                                                                                                                                                                                                                                                                                                                                                                                                                                                                                                                                                                                                                                                                         |
| 45 | Glycine, serine and threonine metabolism |                                                                                                                                                                                                                                                                                                                                                                                                                                                                                                                                                                                                                                                                                                                                                                                                                                                                                                                                                                                                                                                     |
| 46 | Histidine metabolism                     |                                                                                                                                                                                                                                                                                                                                                                                                                                                                                                                                                                                                                                                                                                                                                                                                                                                                                                                                                                                                                                                     |
| 47 | Ascorbate and aldarate metabolism        |                                                                                                                                                                                                                                                                                                                                                                                                                                                                                                                                                                                                                                                                                                                                                                                                                                                                                                                                                                                                                                                     |
| 48 | Terpenoid backbone biosynthesis          |                                                                                                                                                                                                                                                                                                                                                                                                                                                                                                                                                                                                                                                                                                                                                                                                                                                                                                                                                                                                                                                     |

|    |                                                     |                                                                                                                                                                                                                                                                                                                                                                                                                                                                                                                                                                                                                                                                                                                                                             |
|----|-----------------------------------------------------|-------------------------------------------------------------------------------------------------------------------------------------------------------------------------------------------------------------------------------------------------------------------------------------------------------------------------------------------------------------------------------------------------------------------------------------------------------------------------------------------------------------------------------------------------------------------------------------------------------------------------------------------------------------------------------------------------------------------------------------------------------------|
|    |                                                     | Unigene1853_All, CL9394.Contig1_All, CL6224.Contig1_All, Unigene3291_All                                                                                                                                                                                                                                                                                                                                                                                                                                                                                                                                                                                                                                                                                    |
| 49 | Cyanoamino acid metabolism                          | CL2660.Contig1_All, CL4623.Contig1_All, CL8736.Contig1_All, Unigene24991_All, CL3332.Contig1_All, Unigene909_All, CL5903.Contig1_All, Unigene22507_All                                                                                                                                                                                                                                                                                                                                                                                                                                                                                                                                                                                                      |
|    |                                                     | Unigene2628_All, CL8369.Contig2_All, Unigene4264_All, Unigene7683_All, CL2702.Contig3_All, CL2258.Contig1_All, Unigene2513_All, CL3263.Contig2_All, CL924.Contig2_All, CL2139.Contig2_All, Unigene4979_All, CL9252.Contig1_All, Unigene7737_All, CL6059.Contig2_All, CL2258.Contig13_All, CL7190.Contig1_All                                                                                                                                                                                                                                                                                                                                                                                                                                                |
| 50 | Antigen processing and presentation                 | CL6328.Contig3_All, CL8564.Contig2_All, CL6130.Contig1_All, CL8146.Contig4_All, CL6328.Contig1_All, Unigene26422_All, CL8564.Contig1_All, Unigene28617_All, Unigene3207_All, CL7282.Contig3_All, Unigene6153_All, CL5346.Contig1_All, CL5082.Contig2_All                                                                                                                                                                                                                                                                                                                                                                                                                                                                                                    |
| 51 | Cysteine and methionine metabolism                  | CL8738.Contig2_All, Unigene26102_All, Unigene5913_All, CL5497.Contig1_All, Unigene4416_All, CL4294.Contig3_All, Unigene26870_All, CL170.Contig5_All, Unigene636_All, CL3920.Contig3_All, CL342.Contig5_All, CL572.Contig1_All, CL9534.Contig1_All                                                                                                                                                                                                                                                                                                                                                                                                                                                                                                           |
| 52 | Small cell lung cancer                              | Unigene8379_All, CL9400.Contig1_All, CL6249.Contig2_All, CL6224.Contig2_All, CL4126.Contig1_All, CL3242.Contig2_All, CL6224.Contig1_All, CL5082.Contig2_All                                                                                                                                                                                                                                                                                                                                                                                                                                                                                                                                                                                                 |
| 53 | Fat digestion and absorption                        | CL7321.Contig2_All, Unigene5913_All, CL768.Contig3_All, CL2717.Contig2_All, CL9293.Contig2_All, CL3279.Contig1_All, CL846.Contig2_All, CL9626.Contig1_All, CL846.Contig4_All, Unigene74_All, Unigene4416_All, CL3471.Contig2_All, Unigene6964_All, CL3471.Contig1_All, Unigene917_All, CL9776.Contig1_All, Unigene11930_All, CL6161.Contig2_All, CL7321.Contig1_All, CL7190.Contig1_All                                                                                                                                                                                                                                                                                                                                                                     |
| 54 | Tuberculosis                                        | Unigene22279_All, Unigene23921_All, CL1393.Contig2_All, CL834.Contig6_All, CL817.Contig7_All, CL4233.Contig1_All, Unigene11200_All, CL3904.Contig1_All, CL5977.Contig2_All, CL9631.Contig2_All, Unigene18768_All, CL3305.Contig4_All, Unigene6334_All, Unigene23599_All, Unigene2447_All, CL1393.Contig4_All, Unigene4349_All, CL2825.Contig2_All, Unigene18266_All, CL9631.Contig1_All, Unigene26416_All, CL2891.Contig3_All, Unigene4625_All, Unigene26244_All, CL834.Contig3_All, Unigene6024_All, CL2891.Contig1_All, Unigene26585_All, Unigene940_All, Unigene22202_All, CL4098.Contig2_All, CL9915.Contig2_All, CL1573.Contig11_All, CL5253.Contig1_All, CL9932.Contig2_All, Unigene7623_All, CL2029.Contig1_All, Unigene3191_All, CL7288.Contig1_All |
| 55 | Cardiac muscle contraction                          | Unigene7602_All, Unigene22773_All, Unigene2458_All                                                                                                                                                                                                                                                                                                                                                                                                                                                                                                                                                                                                                                                                                                          |
| 56 | Riboflavin metabolism                               | CL8564.Contig2_All, CL8564.Contig1_All, CL5082.Contig2_All                                                                                                                                                                                                                                                                                                                                                                                                                                                                                                                                                                                                                                                                                                  |
| 57 | Homologous recombination                            | CL5044.Contig1_All                                                                                                                                                                                                                                                                                                                                                                                                                                                                                                                                                                                                                                                                                                                                          |
| 58 | Phenylalanine, tyrosine and tryptophan biosynthesis | CL9723.Contig2_All, CL846.Contig2_All, CL554.Contig1_All, CL846.Contig4_All, CL2170.Contig4_All, CL2170.Contig3_All, CL6826.Contig1_All, CL3382.Contig2_All, CL6826.Contig2_All, CL554.Contig2_All                                                                                                                                                                                                                                                                                                                                                                                                                                                                                                                                                          |
| 59 | Polyketide sugar unit biosynthesis                  | CL2664.Contig1_All, CL4004.Contig3_All, Unigene24033_All, CL9626.Contig1_All, CL2713.Contig5_All, CL4768.Contig1_All, CL445.Contig1_All, Unigene8351_All                                                                                                                                                                                                                                                                                                                                                                                                                                                                                                                                                                                                    |
| 60 | Collecting duct acid secretion                      | CL3787.Contig1_All, Unigene22014_All, CL4271.Contig1_All, CL9692.Contig2_All, CL997.Contig1_All, CL8471.Contig1_All, CL234.Contig2_All, CL4271.Contig3_All, CL959.Contig2_All, Unigene2773_All, Unigene6249_All, CL4456.Contig3_All, CL8471.Contig2_All                                                                                                                                                                                                                                                                                                                                                                                                                                                                                                     |
| 61 | Sphingolipid metabolism                             | Unigene4206_All, CL9384.Contig2_All, CL4435.Contig1_All, CL3687.Contig3_All, CL3888.Contig1_All, CL7557.Contig1_All, CL9739.Contig2_All, CL6295.Contig2_All, CL7452.Contig3_All, CL1735.Contig2_All, Unigene2804_All, CL9739.Contig1_All                                                                                                                                                                                                                                                                                                                                                                                                                                                                                                                    |
| 62 | Renin-angiotensin system                            | Unigene7583_All, Unigene6644_All, CL3291.Contig1_All                                                                                                                                                                                                                                                                                                                                                                                                                                                                                                                                                                                                                                                                                                        |
| 63 | Steroid hormone biosynthesis                        |                                                                                                                                                                                                                                                                                                                                                                                                                                                                                                                                                                                                                                                                                                                                                             |
| 64 | Nicotinate and nicotinamide metabolism              |                                                                                                                                                                                                                                                                                                                                                                                                                                                                                                                                                                                                                                                                                                                                                             |

|    |                                                    |                                                                                                                                                                                                                                                                                                                                                                                                                                                                                                                                                                                                                                                                                                                                                                                                                                                                                                                                                                                                                                                                                                                                                                                                                                                                                                                                                                                                                             |
|----|----------------------------------------------------|-----------------------------------------------------------------------------------------------------------------------------------------------------------------------------------------------------------------------------------------------------------------------------------------------------------------------------------------------------------------------------------------------------------------------------------------------------------------------------------------------------------------------------------------------------------------------------------------------------------------------------------------------------------------------------------------------------------------------------------------------------------------------------------------------------------------------------------------------------------------------------------------------------------------------------------------------------------------------------------------------------------------------------------------------------------------------------------------------------------------------------------------------------------------------------------------------------------------------------------------------------------------------------------------------------------------------------------------------------------------------------------------------------------------------------|
| 65 | Neuroactive ligand-receptor interaction            | CL4442.Contig1_All, CL3641.Contig1_All                                                                                                                                                                                                                                                                                                                                                                                                                                                                                                                                                                                                                                                                                                                                                                                                                                                                                                                                                                                                                                                                                                                                                                                                                                                                                                                                                                                      |
| 66 | D-Arginine and D-ornithine metabolism              | Unigene3239_All, CL8578.Contig1_All                                                                                                                                                                                                                                                                                                                                                                                                                                                                                                                                                                                                                                                                                                                                                                                                                                                                                                                                                                                                                                                                                                                                                                                                                                                                                                                                                                                         |
| 67 | Selenocompound metabolism                          | CL3469.Contig5_All, CL3469.Contig1_All                                                                                                                                                                                                                                                                                                                                                                                                                                                                                                                                                                                                                                                                                                                                                                                                                                                                                                                                                                                                                                                                                                                                                                                                                                                                                                                                                                                      |
| 68 | Toxoplasmosis                                      | CL1096.Contig6_All, CL8146.Contig4_All, CL1096.Contig2_All, CL8738.Contig2_All, Unigene26102_All, Unigene5913_All, CL4520.Contig1_All, CL2702.Contig3_All, CL9189.Contig2_All, CL5497.Contig1_All, Unigene4416_All, CL4294.Contig3_All, CL8520.Contig1_All, CL9189.Contig1_All, Unigene26870_All, Unigene7737_All, CL170.Contig5_All, Unigene636_All, CL3920.Contig3_All, CL342.Contig5_All, CL572.Contig1_All, CL9723.Contig2_All, CL2717.Contig2_All, CL7292.Contig4_All, CL2220.Contig1_All, CL846.Contig2_All, CL554.Contig1_All, CL846.Contig4_All, CL2220.Contig2_All, CL56.Contig2_All, CL56.Contig1_All, CL2170.Contig4_All, CL2170.Contig3_All, CL6826.Contig1_All, CL3382.Contig2_All, CL6826.Contig2_All, CL554.Contig2_All, CL7292.Contig2_All, CL9384.Contig2_All, CL7976.Contig1_All, Unigene7473_All, CL5005.Contig5_All, CL4435.Contig1_All, CL9413.Contig1_All, CL3687.Contig3_All, CL9406.Contig1_All, CL6973.Contig1_All, CL953.Contig1_All, CL4316.Contig2_All, CL3242.Contig2_All, Unigene4061_All, CL4316.Contig1_All, CL6295.Contig2_All, CL7503.Contig1_All, CL7664.Contig1_All, Unigene26882_All, CL4016.Contig2_All, CL9338.Contig1_All, CL2570.Contig3_All, Unigene7583_All, CL9768.Contig1_All, CL9413.Contig1_All, Unigene26750_All, CL6341.Contig2_All, Unigene26882_All, CL4442.Contig1_All, CL9240.Contig1_All, CL4904.Contig1_All, CL4016.Contig2_All, CL4695.Contig3_All, Unigene4852_All |
| 69 | Synaptic vesicle cycle                             | CL3136.Contig3_All, CL986.Contig2_All, CL6637.Contig1_All, CL3136.Contig1_All                                                                                                                                                                                                                                                                                                                                                                                                                                                                                                                                                                                                                                                                                                                                                                                                                                                                                                                                                                                                                                                                                                                                                                                                                                                                                                                                               |
| 70 | Drug metabolism—other enzymes                      | CL9862.Contig1_All, CL5475.Contig3_All, CL7342.Contig1_All, CL4474.Contig1_All                                                                                                                                                                                                                                                                                                                                                                                                                                                                                                                                                                                                                                                                                                                                                                                                                                                                                                                                                                                                                                                                                                                                                                                                                                                                                                                                              |
| 71 | Pyrimidine metabolism                              | Unigene27409_All, CL3833.Contig2_All, Unigene6389_All, Unigene28933_All, CL5462.Contig1_All, Unigene27153_All, Unigene21637_All, CL2476.Contig2_All, CL8338.Contig2_All, CL3833.Contig1_All, Unigene5482_All, Unigene28054_All, CL8622.Contig1_All, CL5638.Contig2_All, Unigene26168_All, CL1922.Contig2_All, Unigene21428_All, CL1922.Contig1_All, Unigene2628_All, CL9723.Contig2_All, CL768.Contig3_All, CL2717.Contig2_All, CL8369.Contig2_All, CL846.Contig3_All, CL554.Contig1_All, CL846.Contig4_All, CL4807.Contig4_All, CL4807.Contig1_All, Unigene2513_All, CL7.Contig1_All, CL3263.Contig2_All, Unigene18599_All, CL9252.Contig1_All, Unigene23556_All, Unigene4416_All, CL2170.Contig4_All, CL1117.Contig2_All, CL2170.Contig3_All, CL6059.Contig2_All, CL170.Contig5_All, CL6826.Contig1_All, CL7.Contig8_All, CL1117.Contig1_All, CL3382.Contig2_All, CL6826.Contig2_All, Unigene5916_All, CL6161.Contig2_All, CL7945.Contig2_All, CL554.Contig2_All, CL7190.Contig1_All                                                                                                                                                                                                                                                                                                                                                                                                                                      |
| 72 | Fatty acid biosynthesis                            | CL2780.Contig3_All, CL200.Contig3_All, CL7505.Contig2_All, CL9247.Contig2_All, CL9247.Contig1_All, Unigene6820_All, Unigene26386_All, Unigene22288_All, CL200.Contig1_All, CL3342.Contig3_All, CL3342.Contig1_All, Unigene28039_All, CL5044.Contig1_All                                                                                                                                                                                                                                                                                                                                                                                                                                                                                                                                                                                                                                                                                                                                                                                                                                                                                                                                                                                                                                                                                                                                                                     |
| 73 | Valine, leucine and isoleucine biosynthesis        | CL5661.Contig1_All, Unigene7838_All, Unigene118_All, Unigene104_All, CL3821.Contig1_All, CL1735.Contig2_All, Unigene6696_All, CL4169.Contig1_All, CL4657.Contig1_All                                                                                                                                                                                                                                                                                                                                                                                                                                                                                                                                                                                                                                                                                                                                                                                                                                                                                                                                                                                                                                                                                                                                                                                                                                                        |
| 74 | Prostate cancer                                    | Unigene27831_All, CL2664.Contig1_All, CL3400.Contig1_All, CL445.Contig1_All, Unigene4235_All                                                                                                                                                                                                                                                                                                                                                                                                                                                                                                                                                                                                                                                                                                                                                                                                                                                                                                                                                                                                                                                                                                                                                                                                                                                                                                                                |
| 75 | Phagosome                                          | CL9173.Contig2_All, CL7944.Contig3_All, CL9025.Contig2_All, CL8152.Contig1_All, CL9173.Contig1_All                                                                                                                                                                                                                                                                                                                                                                                                                                                                                                                                                                                                                                                                                                                                                                                                                                                                                                                                                                                                                                                                                                                                                                                                                                                                                                                          |
| 76 | Amino sugar and nucleotide sugar metabolism        | CL3787.Contig1_All, CL3123.Contig2_All, CL3904.Contig1_All, CL9692.Contig2_All, CL997.Contig1_All, Unigene4221_All, CL7620.Contig1_All, CL785.Contig2_All, Unigene6964_All, CL2070.Contig1_All, CL7620.Contig2_All, Unigene3343_All                                                                                                                                                                                                                                                                                                                                                                                                                                                                                                                                                                                                                                                                                                                                                                                                                                                                                                                                                                                                                                                                                                                                                                                         |
| 77 | Linoleic acid metabolism                           |                                                                                                                                                                                                                                                                                                                                                                                                                                                                                                                                                                                                                                                                                                                                                                                                                                                                                                                                                                                                                                                                                                                                                                                                                                                                                                                                                                                                                             |
| 78 | Other glycan degradation (no map in kegg database) |                                                                                                                                                                                                                                                                                                                                                                                                                                                                                                                                                                                                                                                                                                                                                                                                                                                                                                                                                                                                                                                                                                                                                                                                                                                                                                                                                                                                                             |
| 79 | One carbon pool by folate                          |                                                                                                                                                                                                                                                                                                                                                                                                                                                                                                                                                                                                                                                                                                                                                                                                                                                                                                                                                                                                                                                                                                                                                                                                                                                                                                                                                                                                                             |
| 80 | Protein digestion and absorption                   |                                                                                                                                                                                                                                                                                                                                                                                                                                                                                                                                                                                                                                                                                                                                                                                                                                                                                                                                                                                                                                                                                                                                                                                                                                                                                                                                                                                                                             |

|    |                                                                   |                                                                                                                                                                                                                                                                                                                                                                                                                                                                                                                                                                                                                                                                                                                                                                                                                                                                                                                                                                                                                                                                                                                                                                                                                                                                                                                                                                                                                                                                                                                                                                          |
|----|-------------------------------------------------------------------|--------------------------------------------------------------------------------------------------------------------------------------------------------------------------------------------------------------------------------------------------------------------------------------------------------------------------------------------------------------------------------------------------------------------------------------------------------------------------------------------------------------------------------------------------------------------------------------------------------------------------------------------------------------------------------------------------------------------------------------------------------------------------------------------------------------------------------------------------------------------------------------------------------------------------------------------------------------------------------------------------------------------------------------------------------------------------------------------------------------------------------------------------------------------------------------------------------------------------------------------------------------------------------------------------------------------------------------------------------------------------------------------------------------------------------------------------------------------------------------------------------------------------------------------------------------------------|
| 81 | Dorso-ventral axis formation                                      | CL1573.Contig11_All, CL5253.Contig1_All, CL9932.Contig2_All<br>CL7073.Contig3_All, Unigene643_All, CL7073.Contig1_All,<br>CL2683.Contig2_All                                                                                                                                                                                                                                                                                                                                                                                                                                                                                                                                                                                                                                                                                                                                                                                                                                                                                                                                                                                                                                                                                                                                                                                                                                                                                                                                                                                                                             |
| 82 | Lysine biosynthesis                                               | CL9784.Contig1_All                                                                                                                                                                                                                                                                                                                                                                                                                                                                                                                                                                                                                                                                                                                                                                                                                                                                                                                                                                                                                                                                                                                                                                                                                                                                                                                                                                                                                                                                                                                                                       |
| 83 | Staphylococcus aureus infection                                   | Unigene4416_All                                                                                                                                                                                                                                                                                                                                                                                                                                                                                                                                                                                                                                                                                                                                                                                                                                                                                                                                                                                                                                                                                                                                                                                                                                                                                                                                                                                                                                                                                                                                                          |
| 84 | Epithelial cell signaling in<br>Helicobacter pylori infection     | CL9723.Contig2_All, CL2717.Contig2_All, CL846.Contig2_All,<br>CL554.Contig1_All, CL846.Contig4_All, CL2170.Contig4_All,<br>CL2170.Contig3_All, CL6826.Contig1_All, CL3382.Contig2_All,<br>CL6826.Contig2_All, CL554.Contig2_All<br>CL8738.Contig2_All, Unigene26102_All, CL2444.Contig1_All,<br>CL5497.Contig1_All, Unigene4416_All, CL4294.Contig3_All,<br>CL8906.Contig1_All, Unigene26870_All, Unigene9848_All,<br>Unigene636_All, CL3920.Contig3_All, CL6112.Contig1_All,<br>CL6092.Contig4_All, CL342.Contig5_All, CL572.Contig1_All<br>Unigene2628_All, CL8369.Contig2_All, Unigene258_All,<br>CL2702.Contig3_All, CL9117.Contig2_All, CL7455.Contig2_All,<br>Unigene1029_All, CL1271.Contig1_All, CL3263.Contig2_All,<br>CL924.Contig2_All, CL2139.Contig2_All, CL5962.Contig1_All,<br>CL5634.Contig1_All, CL3691.Contig1_All, CL5962.Contig3_All,<br>CL2896.Contig1_All, Unigene2739_All, CL4380.Contig1_All,<br>Unigene9848_All, Unigene7737_All, CL2896.Contig2_All,<br>Unigene24026_All, CL7455.Contig1_All, Unigene4556_All,<br>Unigene161_All, CL2139.Contig1_All, CL2034.Contig1_All,<br>CL6092.Contig4_All, Unigene3641_All, Unigene5916_All,<br>CL6999.Contig1_All, CL5550.Contig3_All, CL954.Contig1_All,<br>CL8075.Contig1_All, CL8659.Contig2_All, CL3585.Contig1_All,<br>CL5550.Contig1_All, CL9458.Contig1_All, CL1922.Contig2_All,<br>CL1922.Contig1_All, CL179.Contig1_All                                                                                                                                                                        |
| 85 | Amoebiasis                                                        | CL3577.Contig2_All, CL9117.Contig2_All, CL5550.Contig3_All,<br>CL5550.Contig1_All                                                                                                                                                                                                                                                                                                                                                                                                                                                                                                                                                                                                                                                                                                                                                                                                                                                                                                                                                                                                                                                                                                                                                                                                                                                                                                                                                                                                                                                                                        |
| 86 | Protein processing in endoplasmic reticulum                       | CL9384.Contig2_All, CL4435.Contig1_All, CL3687.Contig3_All,<br>CL6295.Contig2_All<br>CL2660.Contig1_All, CL3332.Contig1_All<br>CL3399.Contig3_All, CL954.Contig1_All<br>CL2981.Contig1_All, CL3242.Contig2_All<br>CL6219.Contig1_All, CL9953.Contig1_All<br>CL6377.Contig3_All, CL5436.Contig1_All, CL3010.Contig1_All,<br>CL5436.Contig6_All, CL1060.Contig3_All, CL986.Contig2_All,<br>CL3034.Contig2_All, CL3953.Contig2_All, CL4667.Contig1_All,<br>CL3034.Contig1_All<br>CL8738.Contig2_All, Unigene26102_All, Unigene5913_All,<br>Unigene27409_All, CL817.Contig7_All, CL3833.Contig2_All,<br>Unigene6389_All, CL5374.Contig3_All, Unigene28933_All,<br>CL5462.Contig1_All, Unigene27153_All, CL1925.Contig4_All,<br>CL5497.Contig1_All, Unigene21637_All, CL2476.Contig2_All,<br>Unigene4416_All, CL8338.Contig2_All, CL4294.Contig3_All,<br>Unigene26870_All, CL3833.Contig1_All, Unigene5482_All,<br>Unigene28054_All, CL8622.Contig1_All, CL5638.Contig2_All,<br>CL170.Contig5_All, Unigene636_All, Unigene26168_All,<br>CL3920.Contig3_All, CL8485.Contig1_All, CL342.Contig5_All,<br>CL572.Contig1_All, CL1922.Contig2_All, CL9534.Contig1_All,<br>Unigene21428_All, CL1922.Contig1_All<br>CL8738.Contig2_All, Unigene23921_All, CL1393.Contig2_All,<br>CL834.Contig6_All, CL817.Contig7_All, CL4233.Contig1_All,<br>CL9631.Contig2_All, Unigene18768_All, CL5886.Contig1_All,<br>Unigene23599_All, CL1393.Contig4_All, Unigene4349_All,<br>CL601.Contig1_All, Unigene18266_All, CL9631.Contig1_All,<br>Unigene23556_All, Unigene26416_All, Unigene4416_All, |
| 87 | N-Glycan biosynthesis                                             | CL1117.Contig2_All, CL2891.Contig3_All, CL4294.Contig3_All,<br>Unigene31479_All, Unigene26870_All, CL2986.Contig1_All,<br>CL834.Contig3_All, CL8953.Contig2_All, Unigene6024_All,<br>CL170.Contig5_All, CL2891.Contig1_All, Unigene940_All,<br>CL1117.Contig1_All, Unigene22202_All, CL342.Contig5_All,<br>CL7945.Contig2_All, Unigene4305_All, CL1573.Contig11_All,<br>CL601.Contig2_All                                                                                                                                                                                                                                                                                                                                                                                                                                                                                                                                                                                                                                                                                                                                                                                                                                                                                                                                                                                                                                                                                                                                                                                |
| 88 | Other types of O-glycan biosynthesis<br>(no map in kegg database) |                                                                                                                                                                                                                                                                                                                                                                                                                                                                                                                                                                                                                                                                                                                                                                                                                                                                                                                                                                                                                                                                                                                                                                                                                                                                                                                                                                                                                                                                                                                                                                          |
| 89 | Taurine and hypotaurine metabolism                                |                                                                                                                                                                                                                                                                                                                                                                                                                                                                                                                                                                                                                                                                                                                                                                                                                                                                                                                                                                                                                                                                                                                                                                                                                                                                                                                                                                                                                                                                                                                                                                          |
| 90 | Nucleotide excision repair                                        |                                                                                                                                                                                                                                                                                                                                                                                                                                                                                                                                                                                                                                                                                                                                                                                                                                                                                                                                                                                                                                                                                                                                                                                                                                                                                                                                                                                                                                                                                                                                                                          |
| 91 | Steroid biosynthesis                                              |                                                                                                                                                                                                                                                                                                                                                                                                                                                                                                                                                                                                                                                                                                                                                                                                                                                                                                                                                                                                                                                                                                                                                                                                                                                                                                                                                                                                                                                                                                                                                                          |
| 92 | Folate biosynthesis                                               |                                                                                                                                                                                                                                                                                                                                                                                                                                                                                                                                                                                                                                                                                                                                                                                                                                                                                                                                                                                                                                                                                                                                                                                                                                                                                                                                                                                                                                                                                                                                                                          |
| 93 | Adipocytokine signaling pathway                                   |                                                                                                                                                                                                                                                                                                                                                                                                                                                                                                                                                                                                                                                                                                                                                                                                                                                                                                                                                                                                                                                                                                                                                                                                                                                                                                                                                                                                                                                                                                                                                                          |
| 94 | Pathways in cancer                                                |                                                                                                                                                                                                                                                                                                                                                                                                                                                                                                                                                                                                                                                                                                                                                                                                                                                                                                                                                                                                                                                                                                                                                                                                                                                                                                                                                                                                                                                                                                                                                                          |
| 95 | Dilated cardiomyopathy                                            |                                                                                                                                                                                                                                                                                                                                                                                                                                                                                                                                                                                                                                                                                                                                                                                                                                                                                                                                                                                                                                                                                                                                                                                                                                                                                                                                                                                                                                                                                                                                                                          |

|     |                                                        |                                                                                                                                                                                                                                                                                                                                                                                                                                                                                                                                                                                                                                                                                                                                                                                                                                                                                                               |
|-----|--------------------------------------------------------|---------------------------------------------------------------------------------------------------------------------------------------------------------------------------------------------------------------------------------------------------------------------------------------------------------------------------------------------------------------------------------------------------------------------------------------------------------------------------------------------------------------------------------------------------------------------------------------------------------------------------------------------------------------------------------------------------------------------------------------------------------------------------------------------------------------------------------------------------------------------------------------------------------------|
|     |                                                        | CL8738.Contig2_All, Unigene23921_All, CL1393.Contig2_All, CL834.Contig6_All, CL817.Contig7_All, CL4233.Contig1_All, CL9631.Contig2_All, Unigene18768_All, CL5886.Contig1_All, Unigene23599_All, CL1393.Contig4_All, Unigene4349_All, CL601.Contig1_All, Unigene18266_All, CL9631.Contig1_All, Unigene23556_All, Unigene26416_All, Unigene4416_All, CL1117.Contig2_All, CL2891.Contig3_All, CL4294.Contig3_All, Unigene31479_All, Unigene26870_All, CL2986.Contig1_All, CL834.Contig3_All, CL8953.Contig2_All, Unigene6024_All, CL170.Contig5_All, CL2891.Contig1_All, Unigene940_All, CL1117.Contig1_All, Unigene22202_All, CL342.Contig5_All, CL7945.Contig2_All, Unigene4305_All, CL1573.Contig11_All, CL601.Contig2_All                                                                                                                                                                                    |
| 96  | Hypertrophic cardiomyopathy (HCM)                      | CL8738.Contig2_All, CL5886.Contig1_All, Unigene23556_All, Unigene4416_All, CL1117.Contig2_All, CL2891.Contig3_All, CL4294.Contig3_All, Unigene26870_All, CL170.Contig5_All, CL2891.Contig1_All, CL1117.Contig1_All, CL342.Contig5_All, CL7945.Contig2_All, CL1573.Contig11_All                                                                                                                                                                                                                                                                                                                                                                                                                                                                                                                                                                                                                                |
| 97  | Arrhythmogenic right ventricular cardiomyopathy (ARVC) | CL8998.Contig1_All, Unigene23921_All, CL2444.Contig1_All, CL1393.Contig2_All, CL834.Contig6_All, CL1424.Contig1_All, CL4233.Contig1_All, Unigene18768_All, CL5886.Contig1_All, Unigene26445_All, Unigene23599_All, CL2986.Contig2_All, Unigene5927_All, CL1393.Contig4_All, Unigene4349_All, CL5387.Contig2_All, CL7391.Contig3_All, Unigene18266_All, Unigene9846_All, Unigene23556_All, Unigene26416_All, Unigene4416_All, CL1117.Contig2_All, CL8235.Contig2_All, Unigene15532_All, CL834.Contig3_All, CL8974.Contig1_All, Unigene6024_All, CL1444.Contig2_All, CL8953.Contig1_All, CL170.Contig5_All, CL165.Contig1_All, Unigene940_All, CL1117.Contig1_All, Unigene22202_All, CL5387.Contig1_All, CL8307.Contig1_All, CL7945.Contig2_All, CL165.Contig3_All, CL3904.Contig1_All, CL5108.Contig2_All, CL7299.Contig1_All, CL7299.Contig2_All, CL1573.Contig11_All, CL5253.Contig1_All, CL9932.Contig2_All |
| 98  | Regulation of actin cytoskeleton                       | CL3787.Contig1_All, CL9692.Contig2_All, CL997.Contig1_All, CL8471.Contig1_All, Unigene23556_All, CL234.Contig2_All, CL959.Contig2_All, Unigene6249_All, CL8471.Contig2_All, CL3798.Contig1_All, CL3904.Contig1_All, CL2699.Contig3_All, CL1060.Contig3_All, CL2699.Contig1_All, CL8268.Contig2_All, CL8268.Contig3_All, CL5253.Contig1_All, CL9932.Contig2_All, CL3932.Contig2_All, CL860.Contig3_All, CL9412.Contig2_All, Unigene3383_All, CL7324.Contig1_All, CL8987.Contig2_All, CL3932.Contig1_All, Unigene326_All                                                                                                                                                                                                                                                                                                                                                                                        |
| 99  | Mineral absorption                                     | CL2664.Contig1_All                                                                                                                                                                                                                                                                                                                                                                                                                                                                                                                                                                                                                                                                                                                                                                                                                                                                                            |
| 100 | Hematopoietic cell lineage                             | CL6506.Contig1_All                                                                                                                                                                                                                                                                                                                                                                                                                                                                                                                                                                                                                                                                                                                                                                                                                                                                                            |
| 101 | Proximal tubule bicarbonate reclamation                | CL5576.Contig2_All, CL8538.Contig1_All, CL3037.Contig5_All, CL3037.Contig1_All, CL8538.Contig2_All, CL3471.Contig2_All, CL3471.Contig1_All                                                                                                                                                                                                                                                                                                                                                                                                                                                                                                                                                                                                                                                                                                                                                                    |
| 102 | Primary bile acid biosynthesis                         | CL2459.Contig21_All, CL5886.Contig1_All, CL5005.Contig5_All, Unigene4416_All, Unigene4061_All, CL170.Contig5_All, CL8738.Contig2_All, Unigene23921_All, Unigene5913_All, CL1393.Contig2_All, CL834.Contig6_All, CL4233.Contig1_All, Unigene18768_All, Unigene23599_All, CL1393.Contig4_All, Unigene18266_All, Unigene26416_All, Unigene4416_All, CL1117.Contig2_All, CL4294.Contig3_All, Unigene26870_All, CL834.Contig3_All, Unigene6024_All, Unigene940_All, CL1117.Contig1_All, Unigene22202_All, CL342.Contig5_All, CL7945.Contig2_All                                                                                                                                                                                                                                                                                                                                                                    |
| 103 | Glycosphingolipid biosynthesis—ganglio series          | CL1922.Contig2_All, Unigene21286_All, CL1922.Contig1_All                                                                                                                                                                                                                                                                                                                                                                                                                                                                                                                                                                                                                                                                                                                                                                                                                                                      |
| 104 | Vitamin B6 metabolism                                  | CL1969.Contig11_All, Unigene8638_All, CL9820.Contig2_All, CL9820.Contig1_All                                                                                                                                                                                                                                                                                                                                                                                                                                                                                                                                                                                                                                                                                                                                                                                                                                  |
| 105 | Inositol phosphate metabolism                          | CL4623.Contig1_All, CL4746.Contig3_All, Unigene5441_All, CL7683.Contig1_All, CL8736.Contig1_All, Unigene24991_All, CL1742.Contig1_All, Unigene909_All, CL5903.Contig1_All                                                                                                                                                                                                                                                                                                                                                                                                                                                                                                                                                                                                                                                                                                                                     |
| 106 | Type I diabetes mellitus                               |                                                                                                                                                                                                                                                                                                                                                                                                                                                                                                                                                                                                                                                                                                                                                                                                                                                                                                               |
| 107 | Cell adhesion molecules (CAMs)                         |                                                                                                                                                                                                                                                                                                                                                                                                                                                                                                                                                                                                                                                                                                                                                                                                                                                                                                               |
| 108 | Viral myocarditis                                      |                                                                                                                                                                                                                                                                                                                                                                                                                                                                                                                                                                                                                                                                                                                                                                                                                                                                                                               |
| 109 | NOD-like receptor signaling pathway                    |                                                                                                                                                                                                                                                                                                                                                                                                                                                                                                                                                                                                                                                                                                                                                                                                                                                                                                               |
| 110 | Systemic lupus erythematosus                           |                                                                                                                                                                                                                                                                                                                                                                                                                                                                                                                                                                                                                                                                                                                                                                                                                                                                                                               |
| 111 | Retrograde endocannabinoid signaling                   |                                                                                                                                                                                                                                                                                                                                                                                                                                                                                                                                                                                                                                                                                                                                                                                                                                                                                                               |

|     |                                                        |                                                             |
|-----|--------------------------------------------------------|-------------------------------------------------------------|
|     |                                                        | Unigene22507_All                                            |
|     |                                                        | CL9723.Contig2_All, CL2717.Contig2_All, CL846.Contig2_All,  |
|     |                                                        | CL554.Contig1_All, CL846.Contig4_All, CL2170.Contig4_All,   |
| 112 | Vibrio cholerae infection                              | CL1117.Contig2_All, CL4380.Contig1_All, CL2170.Contig3_All, |
|     |                                                        | CL6826.Contig1_All, CL1117.Contig1_All, CL3382.Contig2_All, |
|     |                                                        | CL6826.Contig2_All, Unigene5916_All, CL7945.Contig2_All,    |
|     |                                                        | CL554.Contig2_All                                           |
| 113 | Sulfur metabolism                                      | CL6328.Contig3_All, CL6328.Contig1_All                      |
| 114 | Pantothenate and CoA biosynthesis                      | CL9413.Contig1_All, CL1660.Contig4_All, CL4016.Contig2_All  |
| 115 | Ether lipid metabolism                                 | CL6227.Contig2_All, CL6227.Contig1_All, CL5345.Contig1_All  |
|     |                                                        | CL8738.Contig2_All, CL8998.Contig1_All, Unigene26102_All,   |
|     |                                                        | CL2444.Contig1_All, CL1167.Contig1_All, Unigene6097_All,    |
|     |                                                        | Unigene28711_All, CL5886.Contig1_All, CL9927.Contig1_All,   |
|     |                                                        | Unigene26445_All, CL2986.Contig2_All, Unigene4349_All,      |
|     |                                                        | CL5497.Contig1_All, Unigene23556_All, Unigene4416_All,      |
| 116 | Focal adhesion                                         | CL1117.Contig2_All, CL4294.Contig3_All, Unigene26870_All,   |
|     |                                                        | CL785.Contig2_All, CL8235.Contig2_All, Unigene15532_All,    |
|     |                                                        | CL8974.Contig1_All, CL2070.Contig1_All, Unigene23665_All,   |
|     |                                                        | CL8953.Contig1_All, CL170.Contig5_All, Unigene636_All,      |
|     |                                                        | CL3920.Contig3_All, CL1117.Contig1_All, CL342.Contig5_All,  |
|     |                                                        | CL7945.Contig2_All, CL572.Contig1_All, CL8274.Contig3_All   |
|     |                                                        | CL2570.Contig3_All, CL9064.Contig1_All, CL3108.Contig1_All, |
|     |                                                        | Unigene7583_All, CL200.Contig3_All, CL9025.Contig2_All,     |
|     |                                                        | CL3033.Contig1_All, CL6973.Contig1_All, CL3108.Contig2_All, |
| 117 | Purine metabolism                                      | CL3070.Contig4_All, CL2764.Contig2_All, CL4316.Contig2_All, |
|     |                                                        | CL200.Contig1_All, CL4316.Contig1_All, CL6129.Contig1_All,  |
|     |                                                        | CL3070.Contig5_All, CL3342.Contig3_All, CL4442.Contig1_All, |
|     |                                                        | CL9064.Contig2_All, CL3342.Contig1_All, CL6382.Contig1_All, |
|     |                                                        | Unigene4852_All                                             |
| 118 | Glycosaminoglycan degradation                          | CL2664.Contig1_All                                          |
| 119 | Autoimmune thyroid disease                             | Unigene4061_All                                             |
| 120 | Caffeine metabolism                                    | Unigene7473_All                                             |
|     |                                                        | CL573.Contig1_All, CL573.Contig2_All, CL6584.Contig1_All,   |
| 121 | Ubiquinone and other<br>terpenoid-quinone biosynthesis | Unigene28629_All, CL222.Contig1_All, CL8754.Contig2_All,    |
|     |                                                        | CL6584.Contig3_All                                          |
|     |                                                        | CL2444.Contig1_All, Unigene5927_All, CL6184.Contig1_All,    |
| 122 | Shigellosis                                            | Unigene9846_All, Unigene23556_All, Unigene4416_All,         |
|     |                                                        | CL1117.Contig2_All, CL170.Contig5_All, CL165.Contig1_All,   |
|     |                                                        | CL1117.Contig1_All, CL7945.Contig2_All, CL165.Contig3_All   |
|     |                                                        | CL7321.Contig2_All, CL2464.Contig3_All, CL4990.Contig2_All, |
| 123 | RNA degradation                                        | Unigene5313_All, Unigene743_All, CL3471.Contig2_All,        |
|     |                                                        | CL4078.Contig3_All, Unigene8351_All, CL2464.Contig2_All,    |
|     |                                                        | CL2667.Contig2_All, CL3471.Contig1_All, CL7321.Contig1_All  |
|     |                                                        | CL9384.Contig2_All, CL4520.Contig1_All, CL3904.Contig1_All, |
|     |                                                        | CL5647.Contig3_All, CL4435.Contig1_All, CL3687.Contig3_All, |
| 124 | Bile secretion                                         | CL5647.Contig4_All, CL5647.Contig1_All, CL6295.Contig2_All, |
|     |                                                        | CL5522.Contig1_All, CL6435.Contig1_All, CL5253.Contig1_All, |
|     |                                                        | CL9932.Contig2_All                                          |
| 125 | Type II diabetes mellitus                              | CL6377.Contig3_All, CL3070.Contig4_All, CL3070.Contig5_All  |
|     |                                                        | CL6235.Contig1_All, Unigene8100_All, Unigene6132_All,       |
|     |                                                        | Unigene985_All, Unigene6155_All, Unigene1584_All,           |
|     |                                                        | Unigene72_All, Unigene518_All, CL4434.Contig2_All,          |
|     |                                                        | CL7042.Contig1_All, CL9310.Contig1_All, Unigene10193_All,   |
|     |                                                        | CL9705.Contig1_All, Unigene3766_All, Unigene6057_All,       |
|     |                                                        | Unigene5292_All, CL9005.Contig2_All, Unigene8017_All,       |
|     |                                                        | Unigene2664_All, CL580.Contig2_All, CL6189.Contig1_All,     |
|     |                                                        | CL10028.Contig2_All, Unigene3663_All, Unigene3962_All,      |
| 126 | Ribosome                                               | Unigene9538_All, CL6235.Contig3_All, CL1933.Contig2_All,    |
|     |                                                        | Unigene6078_All, Unigene3508_All, CL4434.Contig1_All,       |
|     |                                                        | CL6029.Contig1_All, CL5329.Contig5_All, CL5329.Contig2_All, |
|     |                                                        | CL10028.Contig1_All, CL933.Contig2_All, Unigene4454_All,    |
|     |                                                        | Unigene7882_All, Unigene2648_All, CL602.Contig2_All,        |
|     |                                                        | CL7042.Contig2_All, CL2875.Contig1_All, CL5922.Contig1_All, |
|     |                                                        | CL5922.Contig2_All, Unigene2821_All, Unigene6108_All,       |
|     |                                                        | CL9705.Contig2_All, CL1778.Contig2_All, Unigene2668_All     |

|     |                                               |                                                                                                                                                                                                                                                                                                                                                                                                                                                                                                                                                                                                     |
|-----|-----------------------------------------------|-----------------------------------------------------------------------------------------------------------------------------------------------------------------------------------------------------------------------------------------------------------------------------------------------------------------------------------------------------------------------------------------------------------------------------------------------------------------------------------------------------------------------------------------------------------------------------------------------------|
| 127 | Leishmaniasis                                 | Unigene4416_All, CL170.Contig5_All                                                                                                                                                                                                                                                                                                                                                                                                                                                                                                                                                                  |
| 128 | p53 signaling pathway                         | Unigene5913_All, CL9534.Contig1_All<br>Unigene6284_All, CL4520.Contig1_All, CL2702.Contig3_All,<br>CL2220.Contig1_All, CL305.Contig4_All, CL5815.Contig2_All,<br>CL5815.Contig1_All, CL2220.Contig2_All, CL8137.Contig2_All,<br>CL305.Contig1_All, Unigene1552_All, CL4429.Contig3_All,<br>CL5446.Contig2_All, CL4429.Contig1_All, Unigene4013_All,<br>CL56.Contig2_All, CL1389.Contig3_All, CL56.Contig1_All,<br>CL3782.Contig4_All, Unigene7737_All, CL5446.Contig1_All,<br>CL9533.Contig1_All, CL1389.Contig1_All<br>CL7391.Contig3_All, Unigene23556_All, Unigene4416_All,<br>CL170.Contig5_All |
| 129 | Endocytosis                                   | Unigene4416_All                                                                                                                                                                                                                                                                                                                                                                                                                                                                                                                                                                                     |
| 130 | Pertussis                                     | CL3798.Contig1_All                                                                                                                                                                                                                                                                                                                                                                                                                                                                                                                                                                                  |
| 131 | Malaria                                       | Unigene6153_All                                                                                                                                                                                                                                                                                                                                                                                                                                                                                                                                                                                     |
| 132 | D-Glutamine and D-glutamate metabolism        | CL4768.Contig1_All                                                                                                                                                                                                                                                                                                                                                                                                                                                                                                                                                                                  |
| 133 | Sulfur relay system                           | CL2702.Contig3_All, CL924.Contig2_All, Unigene9167_All,<br>CL6127.Contig1_All, Unigene7737_All, CL6446.Contig2_All                                                                                                                                                                                                                                                                                                                                                                                                                                                                                  |
| 134 | Glycosphingolipid biosynthesis - globo series | CL2444.Contig1_All, CL1167.Contig1_All, CL2220.Contig1_All,<br>Unigene5927_All, CL6184.Contig1_All, CL2220.Contig2_All,<br>Unigene23556_All, Unigene4416_All, CL1117.Contig2_All,<br>CL8974.Contig1_All, CL170.Contig5_All, CL1117.Contig1_All,<br>CL7945.Contig2_All                                                                                                                                                                                                                                                                                                                               |
| 135 | Prion diseases                                | CL1188.Contig2_All, CL4290.Contig2_All, CL4290.Contig1_All,<br>CL4251.Contig1_All, CL8007.Contig3_All, CL9490.Contig2_All,<br>CL7377.Contig3_All, CL3142.Contig1_All, CL7988.Contig3_All,<br>CL3484.Contig1_All, CL1188.Contig1_All, CL2950.Contig3_All,<br>CL7988.Contig1_All                                                                                                                                                                                                                                                                                                                      |
| 136 | Bacterial invasion of epithelial cells        | CL3904.Contig1_All, Unigene29100_All, Unigene4471_All,<br>CL5253.Contig1_All, CL9932.Contig2_All                                                                                                                                                                                                                                                                                                                                                                                                                                                                                                    |
| 137 | Proteasome                                    | CL3399.Contig3_All                                                                                                                                                                                                                                                                                                                                                                                                                                                                                                                                                                                  |
| 138 | Carbohydrate digestion and absorption         | CL7008.Contig2_All                                                                                                                                                                                                                                                                                                                                                                                                                                                                                                                                                                                  |
| 139 | Base excision repair                          | Unigene5244_All, Unigene5913_All, Unigene2081_All,<br>Unigene21797_All, Unigene9167_All, Unigene27273_All,<br>CL8520.Contig1_All, Unigene28505_All, CL824.Contig2_All                                                                                                                                                                                                                                                                                                                                                                                                                               |
| 140 | Mucin type O-Glycan biosynthesis              | Unigene23921_All, CL1393.Contig2_All, CL834.Contig6_All,<br>CL4233.Contig1_All, Unigene6097_All, Unigene28711_All,<br>Unigene18768_All, Unigene23599_All, CL4807.Contig4_All,<br>Unigene5927_All, CL4807.Contig1_All, CL1393.Contig4_All,<br>Unigene18266_All, Unigene9846_All, Unigene26416_All,<br>CL1117.Contig2_All, CL834.Contig3_All, Unigene6024_All,<br>Unigene23665_All, CL165.Contig1_All, Unigene940_All,<br>CL1117.Contig1_All, Unigene22202_All, CL7945.Contig2_All,<br>CL165.Contig3_All                                                                                              |
| 141 | Amyotrophic lateral sclerosis (ALS)           | CL8998.Contig1_All, CL213.Contig4_All, CL1962.Contig4_All,<br>CL3136.Contig3_All, CL1962.Contig2_All, CL213.Contig3_All,<br>CL1060.Contig3_All, CL986.Contig2_All, CL6637.Contig1_All,<br>CL5329.Contig5_All, CL8235.Contig2_All, CL5329.Contig2_All,<br>CL3809.Contig2_All, CL3136.Contig1_All, Unigene22681_All                                                                                                                                                                                                                                                                                   |
| 142 | Salmonella infection                          | CL3904.Contig1_All, Unigene21272_All, CL5253.Contig1_All,<br>CL9932.Contig2_All                                                                                                                                                                                                                                                                                                                                                                                                                                                                                                                     |
| 143 | Insulin signaling pathway                     | CL8998.Contig1_All, CL3630.Contig2_All, CL4990.Contig2_All,<br>Unigene584_All, CL2538.Contig1_All, CL710.Contig1_All,<br>CL2538.Contig3_All, CL3630.Contig1_All, CL9523.Contig1_All,<br>CL8235.Contig2_All, Unigene2366_All, CL2667.Contig2_All                                                                                                                                                                                                                                                                                                                                                     |
| 144 | Aldosterone-regulated sodium reabsorption     | CL1619.Contig2_All                                                                                                                                                                                                                                                                                                                                                                                                                                                                                                                                                                                  |
| 145 | mRNA surveillance pathway                     | CL9534.Contig1_All                                                                                                                                                                                                                                                                                                                                                                                                                                                                                                                                                                                  |
| 146 | Vitamin digestion and absorption              | Unigene22058_All, CL924.Contig2_All, CL3028.Contig1_All,<br>CL4477.Contig1_All, Unigene5916_All                                                                                                                                                                                                                                                                                                                                                                                                                                                                                                     |
| 147 | Bladder cancer                                | CL3630.Contig2_All, CL4990.Contig2_All, CL918.Contig3_All,<br>Unigene584_All, CL8571.Contig2_All, CL7369.Contig2_All,<br>CL7369.Contig1_All, Unigene29198_All, CL879.Contig2_All,<br>CL3741.Contig3_All, CL1554.Contig3_All, CL4513.Contig2_All,<br>CL8155.Contig3_All, CL550.Contig1_All, CL5015.Contig1_All,<br>CL457.Contig1_All, CL457.Contig2_All, CL3630.Contig1_All                                                                                                                                                                                                                          |
| 148 | Protein export                                |                                                                                                                                                                                                                                                                                                                                                                                                                                                                                                                                                                                                     |
| 149 | RNA transport                                 |                                                                                                                                                                                                                                                                                                                                                                                                                                                                                                                                                                                                     |



|     |                                                           |                                                                                                                                                                                                                                                                                                                                                                                                        |
|-----|-----------------------------------------------------------|--------------------------------------------------------------------------------------------------------------------------------------------------------------------------------------------------------------------------------------------------------------------------------------------------------------------------------------------------------------------------------------------------------|
|     |                                                           | CL9523.Contig1_All, Unigene2366_All, CL1554.Contig2_All, Unigene4231_All, CL3741.Contig1_All, CL2667.Contig2_All, Unigene5006_All, CL550.Contig2_All, CL9532.Contig2_All, CL4513.Contig1_All                                                                                                                                                                                                           |
| 150 | Calcium signaling pathway                                 | CL5576.Contig2_All, Unigene26445_All, CL9626.Contig1_All, CL2986.Contig2_All, CL9189.Contig2_All, CL477.Contig1_All, Unigene686_All, CL5446.Contig2_All, CL2891.Contig3_All, CL9189.Contig1_All, Unigene15532_All, CL4242.Contig1_All, CL5446.Contig1_All, CL8953.Contig1_All, CL4242.Contig2_All, CL2891.Contig1_All, CL1573.Contig11_All                                                             |
| 151 | Ribosome biogenesis in eukaryotes                         | CL4524.Contig3_All, CL5800.Contig2_All, CL9760.Contig1_All, CL4429.Contig3_All, CL5800.Contig1_All, CL4429.Contig1_All, CL9523.Contig1_All, Unigene703_All, CL9760.Contig2_All                                                                                                                                                                                                                         |
| 152 | Transcriptional misregulation in cancer                   | Unigene3189_All, Unigene8425_All, CL1969.Contig11_All                                                                                                                                                                                                                                                                                                                                                  |
| 153 | Apoptosis                                                 | Unigene5913_All, CL1962.Contig4_All, CL1962.Contig2_All                                                                                                                                                                                                                                                                                                                                                |
| 154 | Legionellosis                                             | Unigene5913_All, CL2702.Contig3_All, Unigene4416_All, CL3471.Contig2_All, Unigene7737_All, CL8483.Contig2_All, CL3471.Contig1_All                                                                                                                                                                                                                                                                      |
| 155 | RIG-I-like receptor signaling pathway                     | CL1181.Contig3_All                                                                                                                                                                                                                                                                                                                                                                                     |
| 156 | Taste transduction                                        | Unigene5441_All                                                                                                                                                                                                                                                                                                                                                                                        |
| 157 | Glycerophospholipid metabolism                            | Unigene1879_All, CL7291.Contig1_All, CL4126.Contig1_All, CL2415.Contig1_All, CL1951.Contig2_All, CL1951.Contig1_All, Unigene601_All                                                                                                                                                                                                                                                                    |
| 158 | Fc gamma R-mediated phagocytosis                          | CL6377.Contig3_All, CL9626.Contig1_All, Unigene5927_All, CL5387.Contig2_All, CL7391.Contig3_All, Unigene1552_All, CL1444.Contig2_All, CL5387.Contig1_All, CL8307.Contig1_All, CL2239.Contig1_All, CL8998.Contig1_All, Unigene5913_All, Unigene29319_All, CL1474.Contig1_All, CL214.Contig3_All, CL8235.Contig2_All, CL4562.Contig4_All                                                                 |
| 159 | Herpes simplex infection                                  | CL5329.Contig5_All, CL5329.Contig2_All                                                                                                                                                                                                                                                                                                                                                                 |
| 160 | mTOR signaling pathway                                    | Unigene8642_All, CL6377.Contig3_All, CL2702.Contig3_All, Unigene7737_All, CL9534.Contig1_All                                                                                                                                                                                                                                                                                                           |
| 161 | Measles                                                   | CL8998.Contig1_All, CL6377.Contig3_All, Unigene23921_All, CL1393.Contig2_All, CL834.Contig6_All, CL4233.Contig1_All, Unigene18768_All, Unigene26445_All, Unigene23599_All, CL2986.Contig2_All, CL1393.Contig4_All, Unigene18266_All, Unigene26416_All, CL8235.Contig2_All, Unigene15532_All, CL834.Contig3_All, Unigene6024_All, CL8953.Contig1_All, Unigene940_All, Unigene22202_All, Unigene2623_All |
| 162 | Vascular smooth muscle contraction                        | CL9534.Contig1_All                                                                                                                                                                                                                                                                                                                                                                                     |
| 163 | Melanoma                                                  | Unigene2628_All, CL5150.Contig2_All, CL8369.Contig2_All, CL9927.Contig1_All, Unigene686_All, CL3263.Contig2_All, CL5150.Contig1_All, Unigene3239_All, Unigene4416_All, CL4242.Contig1_All, CL4242.Contig2_All, CL3399.Contig3_All, CL9534.Contig1_All                                                                                                                                                  |
| 164 | HTLV-I infection                                          | CL3904.Contig1_All, CL2220.Contig1_All, CL2220.Contig2_All, CL56.Contig2_All, CL56.Contig1_All, CL1573.Contig11_All, CL5253.Contig1_All, CL9932.Contig2_All                                                                                                                                                                                                                                            |
| 165 | Endocrine and other factor-regulated calcium reabsorption | CL1424.Contig1_All, CL3904.Contig1_All, Unigene26445_All, CL2986.Contig2_All, CL1117.Contig2_All, Unigene15532_All, CL8953.Contig1_All, CL1117.Contig1_All, CL7945.Contig2_All, CL5253.Contig1_All, CL9932.Contig2_All                                                                                                                                                                                 |
| 166 | Gastric acid secretion                                    | CL4807.Contig4_All, CL4807.Contig1_All, Unigene4171_All, CL2444.Contig1_All, CL1424.Contig1_All, Unigene4349_All, Unigene4416_All, CL1117.Contig2_All, CL8974.Contig1_All, CL170.Contig5_All, CL1117.Contig1_All, CL7945.Contig2_All                                                                                                                                                                   |
| 167 | Vasopressin-regulated water reabsorption                  | CL5374.Contig3_All, CL8485.Contig1_All                                                                                                                                                                                                                                                                                                                                                                 |
| 168 | Leukocyte transendothelial migration                      | CL1925.Contig4_All, CL9534.Contig1_All                                                                                                                                                                                                                                                                                                                                                                 |
| 169 | Renal cell carcinoma                                      | CL817.Contig7_All                                                                                                                                                                                                                                                                                                                                                                                      |
| 170 | Pancreatic cancer                                         | CL8183.Contig3_All, CL4247.Contig1_All, CL701.Contig1_All                                                                                                                                                                                                                                                                                                                                              |
| 171 | Thyroid cancer                                            | CL5661.Contig1_All, Unigene7838_All, Unigene5441_All, CL3821.Contig1_All, Unigene6696_All, CL4169.Contig1_All                                                                                                                                                                                                                                                                                          |
| 172 | ABC transporters                                          | CL8520.Contig1_All                                                                                                                                                                                                                                                                                                                                                                                     |
| 173 | Serotonergic synapse                                      | CL6614.Contig2_All, Unigene5441_All, CL7038.Contig1_All, CL6614.Contig1_All                                                                                                                                                                                                                                                                                                                            |
| 174 | Toll-like receptor signaling pathway                      |                                                                                                                                                                                                                                                                                                                                                                                                        |
| 175 | GABAergic synapse                                         |                                                                                                                                                                                                                                                                                                                                                                                                        |

|     |                                                           |                                                                                                                                                                                                                                                                                                                                                                                                                                                                                                                                                                                                                                                                                                     |
|-----|-----------------------------------------------------------|-----------------------------------------------------------------------------------------------------------------------------------------------------------------------------------------------------------------------------------------------------------------------------------------------------------------------------------------------------------------------------------------------------------------------------------------------------------------------------------------------------------------------------------------------------------------------------------------------------------------------------------------------------------------------------------------------------|
| 176 | Cell cycle                                                | CL5150.Contig2_All, CL5150.Contig1_All, CL3399.Contig3_All, CL9534.Contig1_All                                                                                                                                                                                                                                                                                                                                                                                                                                                                                                                                                                                                                      |
| 177 | NF-kappa B signaling pathway<br>(no map in kegg database) | CL6377.Contig3_All                                                                                                                                                                                                                                                                                                                                                                                                                                                                                                                                                                                                                                                                                  |
| 178 | Jak-STAT signaling pathway                                | CL3782.Contig4_All                                                                                                                                                                                                                                                                                                                                                                                                                                                                                                                                                                                                                                                                                  |
| 179 | VEGF signaling pathway                                    | CL9626.Contig1_All, Unigene9848_All, CL8974.Contig1_All, CL6092.Contig4_All                                                                                                                                                                                                                                                                                                                                                                                                                                                                                                                                                                                                                         |
| 180 | Phototransduction—fly                                     | Unigene5441_All, CL1117.Contig2_All, CL1117.Contig1_All, CL7945.Contig2_All                                                                                                                                                                                                                                                                                                                                                                                                                                                                                                                                                                                                                         |
| 181 | Influenza A                                               | Unigene5913_All, CL2702.Contig3_All, Unigene686_All, CL710.Contig1_All, CL1117.Contig2_All, CL8520.Contig1_All, CL9523.Contig1_All, Unigene7737_All, CL7083.Contig2_All, CL4242.Contig2_All, CL1117.Contig1_All, CL8075.Contig1_All, CL7945.Contig2_All                                                                                                                                                                                                                                                                                                                                                                                                                                             |
| 182 | Alcoholism                                                | CL8998.Contig1_All, Unigene5441_All, CL1969.Contig11_All, CL8235.Contig2_All, Unigene8638_All                                                                                                                                                                                                                                                                                                                                                                                                                                                                                                                                                                                                       |
| 183 | Progesterone-mediated oocyte maturation                   | CL5150.Contig2_All, CL5150.Contig1_All                                                                                                                                                                                                                                                                                                                                                                                                                                                                                                                                                                                                                                                              |
| 184 | Chronic myeloid leukemia                                  | CL9534.Contig1_All                                                                                                                                                                                                                                                                                                                                                                                                                                                                                                                                                                                                                                                                                  |
| 185 | Spliceosome                                               | CL2239.Contig1_All, Unigene4216_All, CL3630.Contig2_All, CL3606.Contig2_All, CL2702.Contig3_All, Unigene29319_All, CL7930.Contig3_All, Unigene584_All, Unigene3189_All, Unigene8425_All, Unigene25931_All, CL166.Contig1_All, CL1474.Contig1_All, CL214.Contig3_All, CL3630.Contig1_All, Unigene2366_All, CL4562.Contig4_All, Unigene7737_All, Unigene5979_All, CL171.Contig2_All, Unigene1550_All, CL3606.Contig8_All                                                                                                                                                                                                                                                                              |
| 186 | Adherens junction                                         | CL2444.Contig1_All, CL6709.Contig2_All, CL1117.Contig2_All, CL1117.Contig1_All, CL7945.Contig2_All                                                                                                                                                                                                                                                                                                                                                                                                                                                                                                                                                                                                  |
| 187 | Tight junction                                            | CL6377.Contig3_All, Unigene23921_All, CL1393.Contig2_All, CL834.Contig6_All, CL4233.Contig1_All, Unigene18768_All, CL2148.Contig1_All, Unigene23599_All, CL2414.Contig2_All, CL6184.Contig1_All, CL1393.Contig4_All, Unigene4349_All, CL7859.Contig1_All, Unigene18266_All, Unigene26416_All, CL1117.Contig2_All, CL2148.Contig2_All, CL834.Contig3_All, Unigene6024_All, Unigene940_All, CL1117.Contig1_All, Unigene22202_All, CL7945.Contig2_All, CL9534.Contig1_All, Unigene6097_All, CL2702.Contig3_All, Unigene28711_All, CL8549.Contig2_All, CL6847.Contig1_All, CL8520.Contig1_All, Unigene4951_All, Unigene9848_All, Unigene7737_All, Unigene23665_All, CL6092.Contig4_All, Unigene2489_All |
| 188 | MAPK signaling pathway                                    | CL1167.Contig1_All                                                                                                                                                                                                                                                                                                                                                                                                                                                                                                                                                                                                                                                                                  |
| 189 | Endometrial cancer                                        | Unigene5913_All                                                                                                                                                                                                                                                                                                                                                                                                                                                                                                                                                                                                                                                                                     |
| 190 | Colorectal cancer                                         | CL1424.Contig1_All, Unigene5927_All, CL6184.Contig1_All, CL7.Contig1_All, Unigene18599_All, Unigene4416_All, CL1117.Contig2_All, CL170.Contig5_All, CL7.Contig8_All, CL1117.Contig1_All, CL7945.Contig2_All                                                                                                                                                                                                                                                                                                                                                                                                                                                                                         |
| 191 | Pathogenic Escherichia coli infection                     | CL8998.Contig1_All, CL8235.Contig2_All                                                                                                                                                                                                                                                                                                                                                                                                                                                                                                                                                                                                                                                              |
| 192 | Amphetamine addiction                                     | CL8998.Contig1_All, CL5150.Contig2_All, CL5150.Contig1_All, CL8235.Contig2_All                                                                                                                                                                                                                                                                                                                                                                                                                                                                                                                                                                                                                      |
| 193 | Oocyte meiosis                                            | CL1188.Contig2_All, CL2702.Contig3_All, CL7377.Contig3_All, CL3142.Contig1_All, CL7988.Contig3_All, CL8520.Contig1_All, Unigene9848_All, Unigene7737_All, CL1188.Contig1_All, CL2950.Contig3_All, CL6092.Contig4_All, CL7988.Contig1_All, CL9534.Contig1_All                                                                                                                                                                                                                                                                                                                                                                                                                                        |
| 194 | Epstein-Barr virus infection                              | CL3904.Contig1_All, CL2891.Contig3_All, CL3242.Contig2_All, CL2891.Contig1_All, CL5253.Contig1_All, CL9932.Contig2_All                                                                                                                                                                                                                                                                                                                                                                                                                                                                                                                                                                              |
| 195 | Non-small cell lung cancer                                | Unigene5441_All                                                                                                                                                                                                                                                                                                                                                                                                                                                                                                                                                                                                                                                                                     |
| 196 | Pancreatic secretion                                      | CL9534.Contig1_All                                                                                                                                                                                                                                                                                                                                                                                                                                                                                                                                                                                                                                                                                  |
| 197 | Morphine addiction                                        | CL7391.Contig3_All, Unigene4416_All, CL170.Contig5_All                                                                                                                                                                                                                                                                                                                                                                                                                                                                                                                                                                                                                                              |
| 198 | Glioma                                                    | CL6377.Contig3_All, CL8520.Contig1_All                                                                                                                                                                                                                                                                                                                                                                                                                                                                                                                                                                                                                                                              |
| 199 | Axon guidance                                             | CL4520.Contig1_All                                                                                                                                                                                                                                                                                                                                                                                                                                                                                                                                                                                                                                                                                  |
| 200 | Fc epsilon RI signaling pathway                           | CL3904.Contig1_All, Unigene27913_All, CL5253.Contig1_All, CL9932.Contig2_All                                                                                                                                                                                                                                                                                                                                                                                                                                                                                                                                                                                                                        |
| 201 | Hepatitis C                                               | CL5150.Contig2_All, CL7930.Contig3_All, CL5150.Contig1_All, Unigene6239_All, Unigene29387_All, CL8485.Contig1_All                                                                                                                                                                                                                                                                                                                                                                                                                                                                                                                                                                                   |
| 202 | Salivary secretion                                        |                                                                                                                                                                                                                                                                                                                                                                                                                                                                                                                                                                                                                                                                                                     |
| 203 | Ubiquitin mediated proteolysis                            |                                                                                                                                                                                                                                                                                                                                                                                                                                                                                                                                                                                                                                                                                                     |

|     |                                           |                                                         |
|-----|-------------------------------------------|---------------------------------------------------------|
| 204 | ErbB signaling pathway                    | CL5446.Contig2_All, CL5446.Contig1_All                  |
| 205 | Long-term potentiation                    | CL8998.Contig1_All, CL8235.Contig2_All                  |
| 206 | Chagas disease (American trypanosomiasis) | CL3263.Contig2_All                                      |
| 207 | Natural killer cell mediated cytotoxicity | Unigene4416_All                                         |
| 208 | Phosphatidylinositol signaling system     | CL5576.Contig2_All                                      |
| 209 | Wnt signaling pathway                     | Unigene8436_All, CL2595.Contig1_All, CL2595.Contig3_All |
| 210 | Neurotrophin signaling pathway            | CL6377.Contig3_All, Unigene4171_All                     |
| 211 | T cell receptor signaling pathway         | CL6377.Contig3_All, CL9534.Contig1_All                  |
| 212 | GnRH signaling pathway                    | CL6377.Contig3_All, CL8520.Contig1_All                  |
| 213 | Gap junction                              | CL7.Contig1_All, Unigene18599_All, CL7.Contig8_All      |
| 214 | Chemokine signaling pathway               | CL6377.Contig3_All, Unigene5441_All, CL8974.Contig1_All |
| 215 | Dopaminergic synapse                      | CL8998.Contig1_All, Unigene5441_All, CL8235.Contig2_All |
| 216 | Glutamatergic synapse                     | Unigene5441_All, CL3469.Contig1_All                     |
| 217 | Cholinergic synapse                       | Unigene5441_All                                         |

Table S7. Primer sequences for qRT-PCR.

| Gene           | Forward Primer (5'–3')  | Reverse Primer (5'–3')   |
|----------------|-------------------------|--------------------------|
| CL8625.Contig1 | ATACATCGGCTTTCACAGGC    | ACAAAACGGCCTACCACTTG     |
| CL8429.Contig1 | TGGCACCTCTAGCCTCAAAT    | GGGGACTCATGGAGAACAGA     |
| CL5894.Contig1 | AAAGAGGAAAATAGCGACGAGTG | GCGACTAGAACCTGTTGGGAGTAT |
| CL5488.Contig2 | TTCCTACCCAGTCAGCGTG     | ACGGGACAGGTTTGTTCACAG    |
| CL5080.Contig2 | CTTGCATCGTGGGAATTCTT    | TGTGCCATTTTCCACTTTCA     |
| CL4567.Contig1 | CACGGGCTTGTTTATTGACC    | CACTCAAACCTGCAGCCACAT    |
| CL3263.Contig1 | AATGGACAAAGTCGTGAGGC    | AACTCGAGGAAAGCAGACCA     |
| CL2270.Contig1 | ATGGGTGCAATGTCACAAGA    | CTTCCTAGCGTAAACAGCGG     |
| CL2264.Contig1 | GCCTATGCATTAAGGGGTCA    | TCTTCCATTGTTTCCCTCG      |
| Unigene2394    | GCTGAGGACTCCAGCATCAT    | TTTGCCAGCGTTGTTTACTG     |
| Uni2628gene    | TGACAACTGGTGGTATGGAAGG  | TGACTGTTACTTTCGTCGTGGC   |
| Unigene7511    | AACAAGCTCAACGGCAAAGT    | AAACTGGTTGCATGGAAAGC     |
| <i>β-tub</i>   | TGACAACGAAGCCCTTTACGAC  | CAGGCATGAAGAAGTGGAGACG   |

**Table S8.** Primer sequences for RNAi. The T7 promoter sequences were underlined.

| Primer Names         | Primer Sequences (5'-3')                            |
|----------------------|-----------------------------------------------------|
| <i>FART7</i> forward | <u>TAATACGACTCACTATAGGG</u> AAAGACTCGGCTCGGA        |
| <i>FAR</i> reverse   | TCTGGTGTAAGATTACATTAA                               |
| <i>FAR</i> forward   | AAAGACTCGGCTCGGA                                    |
| <i>FART7</i> reverse | <u>TAATACGACTCACTATAGGG</u> GTCTGGTGTAAGATTACATTAA  |
| <i>ENG7</i> forward  | <u>TAATACGACTCACTATAGGG</u> TCTTTCATTTCGGATTTCG     |
| <i>ENG</i> reverse   | CGTCCATTGTGGCCTTCT                                  |
| <i>ENG</i> forward   | TCTTTCATTTCGGATTTCG                                 |
| <i>ENG7</i> reverse  | <u>TAATACGACTCACTATAGGG</u> CGTCCATTGTGGCCTTCT      |
| <i>GFPT7</i> forward | <u>TAATACGACTCACTATAGGG</u> AAAGGAGAAGAAGAACTTTTCAC |
| <i>GFP</i> reverse   | CTGTTACAAACTCAAGAAGG                                |
| <i>GFP</i> forward   | AAAGGAGAAGAAGAACTTTTCAC                             |
| <i>GFPT7</i> reverse | <u>TAATACGACTCACTATAGGG</u> CTGTTACAAACTCAAGAAGG    |
| <i>β-tub</i> forward | TGACAACGAAGCCCTTTACGAC                              |
| <i>β-tub</i> reverse | CAGGCATGAAGAAGTGGAGACG                              |
